# Supplementary material for: Allelopathic effects and composition of aqueous extracts from different parts of Galinsoga parviflora Cav. on Medicago sativa L. and Avena sativa L
Source: PeerJ journal article supplement (doi:10.7717/peerj.19378), 2025-05-08
Supplement: Raw_data_20250306.xlsx [file Raw_data_20250306.xlsx]

## Sheet: Metabolite Quantitative Informa
ID	Metabolite	Formula	Retention time(min)	Mass Error (ppm)	m/z	Mode	Adducts	Pubchem_ID	InChiKeys	SMILES	xlogp	KEGG	classA	classB	classC	NXJWHOLE PLANTS	NXJSTEM	NXJLEAF	NXJROOT
6.88_172.0730n	1,4-Cyclohexanedicarboxylic acid	C8H12O4	6.87993	-3.03508	171.066	neg	M-H, 2M-H	14106	PXGZQGDTEZPERC-UHFFFAOYSA-N	C1CC(CCC1C(=O)O)C(=O)O	0.5		Organic acids and derivatives	Carboxylic acids and derivatives	Dicarboxylic acids and derivatives	3.65873e+08	5.30522e+08	3.42577e+08	4.38486e+06
0.79_377.0845m/z	trehalose	C12H22O11	0.793683	-3.23365	377.085	neg	M+Cl	7427	HDTRYLNUVZCQOY-LIZSDCNHSA-N	C([C@@H]1[C@H]([C@@H]([C@H]([C@H](O1)O[C@@H]2[C@@H]([C@H]([C@@H]([C@H](O2)CO)O)O)O)O)O)O)O	-4.2	C01083	Organic oxygen compounds	Organooxygen compounds	Carbohydrates and carbohydrate conjugates	1.0804e+08	9.72577e+07	3.74048e+07	1.1016e+08
5.34_480.0892n	Gossypin	C21H20O13	5.33662	-2.42722	481.097	pos	M+H, M+Na					C10051				6.79017e+07	3.61329e+07	5.24101e+07	7.95721e+06
0.79_342.1151n	alpha,beta-Trehalose	C12H22O11	0.789917	-3.30083	381.078	pos	M+K, 2M+K, M+Na	10871590	HDTRYLNUVZCQOY-BTLHAWITSA-N	C([C@@H]1[C@H]([C@@H]([C@H]([C@H](O1)O[C@H]2[C@@H]([C@H]([C@@H]([C@H](O2)CO)O)O)O)O)O)O)O	-4.2	C01083	Organic oxygen compounds	Organooxygen compounds	Carbohydrates and carbohydrate conjugates	4.48916e+07	7.77802e+07	1.23057e+07	4.98418e+07
1.43_268.1033m/z	Adenosine	C10H13N5O4	1.43417	-2.91788	268.103	pos	M+H	60961	OIRDTQYFTABQOQ-KQYNXXCUSA-N	C1=NC(=C2C(=N1)N(C=N2)[C@H]3[C@@H]([C@@H]([C@H](O3)CO)O)O)N	-1.1	C00212	Nucleosides, nucleotides, and analogues	Purine nucleosides		4.40661e+07	5.30525e+07	4.47887e+07	1.98001e+07
4.66_354.0942n	Cyclohexanecarboxylic acid	C16H18O9	4.66087	-2.61987	355.101	pos	M+H-H2O, M+H, M+K, M+Na, 2M+Na, M+NH4	7413	NZNMSOFKMUBTKW-UHFFFAOYSA-N	C1CCC(CC1)C(=O)O	1.9	C09822	Organic acids and derivatives	Carboxylic acids and derivatives	Carboxylic acids	4.24422e+07	4.65247e+07	1.65082e+07	3.21482e+07
6.17_516.1256n	3,4-Dicaffeoylquinic acid	C25H24O12	6.16993	-2.32534	515.118	neg	M-2H, M-H	5281780	UFCLZKMFXSILNL-PSEXTPKNSA-N	C1[C@H]([C@H]([C@@H](C[C@@]1(C(=O)O)O)OC(=O)/C=C/C2=CC(=C(C=C2)O)O)OC(=O)/C=C/C3=CC(=C(C=C3)O)O)O	1.5		Organic oxygen compounds	Organooxygen compounds	Alcohols and polyols	3.81729e+07	2.44617e+07	2.14387e+07	1.27113e+07
1.20_118.0262n	Succinic acid	C4H6O4	1.2041	-3.74453	117.019	neg	M-H, M+Cl, M-H2O-H	1110	KDYFGRWQOYBRFD-UHFFFAOYSA-N	C(CC(=O)O)C(=O)O	-0.6	C00042	Organic acids and derivatives	Carboxylic acids and derivatives	Dicarboxylic acids and derivatives	2.9678e+07	3.98879e+07	1.54897e+07	2.38442e+07
0.79_539.1374m/z	Raffinose	C18H32O16	0.793683	-2.14831	539.137	neg	M+Cl	439242	MUPFEKGTMRGPLJ-ZQSKZDJDSA-N	C([C@@H]1[C@@H]([C@@H]([C@H]([C@H](O1)OC[C@@H]2[C@H]([C@@H]([C@H]([C@H](O2)O[C@]3([C@H]([C@@H]([C@H](O3)CO)O)O)CO)O)O)O)O)O)O)O	-5.8	C00492	Organic oxygen compounds	Organooxygen compounds	Carbohydrates and carbohydrate conjugates	2.37271e+07	3.56779e+07	3.59933e+06	3.05392e+07
3.64_203.0820m/z	D-Tryptophan	C11H12N2O2	3.63682	-2.73271	203.082	neg	M-H	9060	QIVBCDIJIAJPQS-SECBINFHSA-N	C1=CC=C2C(=C1)C(=CN2)C[C@H](C(=O)O)N	-1.1	C00525	Organoheterocyclic compounds	Indoles and derivatives	Indolyl carboxylic acids and derivatives	2.30583e+07	1.46773e+07	1.17256e+07	1.29421e+07
6.07_516.1257n	Isochlorogenic acid A	C25H24O12	6.0677	-2.17	515.118	neg	M-2H, M-H	6474310	KRZBCHWVBQOTNZ-RDJMKVHDSA-N	C1C(C[C@H](C([C@@H]1OC(=O)/C=C/C2=CC(=C(C=C2)O)O)O)OC(=O)/C=C/C3=CC(=C(C=C3)O)O)(O)C(=O)O	1.5	C10468	Organic oxygen compounds	Organooxygen compounds	Alcohols and polyols	2.30297e+07	2.97887e+06	1.81123e+07	1.74365e+06
0.83_863.2428m/z	Verbascose	C30H52O26	0.834033	-1.5685	863.243	neg	M+Cl					C08252				2.12693e+07	2.98182e+07	5.81256e+06	4.37951e+07
5.72_465.1018m/z	Spiraeoside	C21H20O12	5.72168	-2.04774	465.102	pos	M+H	5320844	OIUBYZLTFSLSBY-HMGRVEAOSA-N	C1=CC(=C(C=C1C2=C(C(=O)C3=C(C=C(C=C3O2)O)O)O)O)O[C@H]4[C@@H]([C@H]([C@@H]([C@H](O4)CO)O)O)O	0.4		Phenylpropanoids and polyketides	Flavonoids	Flavonoid glycosides	1.97331e+07	1.43066e+07	1.53472e+07	2.42453e+06
8.41_361.0906m/z	5,7,3'-Trihydroxy-6,4',5'-trimethoxyflavone	C18H16O8	8.41495	-3.21578	361.091	pos	M+H	5496475	PMBOOVZSTMWOFS-UHFFFAOYSA-N	COC1=CC(=CC(=C1OC)O)C2=CC(=O)C3=C(O2)C=C(C(=C3O)OC)O	2.6	C04552	Phenylpropanoids and polyketides	Flavonoids	O-methylated flavonoids	1.89409e+07	8.18398e+07	1.50614e+07	1.30132e+06
4.66_162.0313n	4-Methylphthalic anhydride	C9H6O3	4.66087	-2.55444	163.039	pos	M+H-H2O, M+H	88069	ZOXBWJMCXHTKNU-UHFFFAOYSA-N	CC1=CC2=C(C=C1)C(=O)OC2=O	1.7		Organoheterocyclic compounds	Benzofurans	Benzofuranones	1.84806e+07	2.16156e+07	8.0962e+06	1.51498e+07
5.97_495.1122m/z	Laricitrin 3-galactoside	C22H22O13	5.97053	-2.22778	495.112	pos	M+H									1.70276e+07	1.81884e+07	1.06057e+07	1.63445e+06
6.18_508.1207n	Syringetin-3-O-galactoside	C23H24O13	6.18157	-1.86264	509.128	pos	M+H, M+Na	20056941	JMFWYRWPJVEZPV-SFBSONLZSA-N	COC1=CC(=CC(=C1O)OC)C2=C(C(=O)C3=C(C=C(C=C3O2)O)O)OC4[C@@H]([C@H]([C@H]([C@H](O4)CO)O)O)O	0.7		Phenylpropanoids and polyketides	Flavonoids	Flavonoid glycosides	1.6929e+07	4.08803e+07	5.43636e+06	3.30613e+06
5.35_959.1720m/z	Myricetin-3-O-galactoside	C21H20O13	5.35247	-1.56168	959.172	neg	2M-H	5491408	FOHXFLPXBUAOJM-MGMURXEASA-N	C1=C(C=C(C(=C1O)O)O)C2=C(C(=O)C3=C(C=C(C=C3O2)O)O)O[C@H]4[C@@H]([C@H]([C@H]([C@H](O4)CO)O)O)O	0		Phenylpropanoids and polyketides	Flavonoids	Flavonoid glycosides	1.6258e+07	8.41296e+06	1.09923e+07	433474
7.35_209.0298m/z	Mucicacid	C6H10O8	7.3489	-2.4988	209.03	neg	M-H	3037582	DSLZVSRJTYRBFB-DUHBMQHGSA-N	[C@@H]([C@@H]([C@H](C(=O)O)O)O)([C@@H](C(=O)O)O)O	-2.5	C00879	Organic oxygen compounds	Organooxygen compounds	Carbohydrates and carbohydrate conjugates	1.60865e+07	1.58253e+07	7.77344e+06	1.14877e+07
3.66_360.1047n	1-O-(3-Hydroxy-4,5-dimethoxybenzoyl)hexopyranose	C15H20O10	3.65662	-2.58236	359.097	neg	M-H, M+Cl									1.56754e+07	9.82686e+06	1.79568e+07	7.08055e+06
6.40_196.1095n	Loliolide	C11H16O3	6.40278	-2.16399	197.117	pos	M+H-H2O, M+H, M+ACN+H, M+H-2H2O	100332	XEVQXKKKAVVSMW-WRWORJQWSA-N	C[C@@]12C[C@H](CC(C1=CC(=O)O2)(C)C)O	1		Organoheterocyclic compounds	Benzofurans		1.48825e+07	6.32771e+06	2.43927e+07	1.52069e+06
1.63_231.0140m/z	Maleic acid	C4H4O4	1.62638	-2.96133	231.014	neg	2M-H	444266	VZCYOOQTPOCHFL-UPHRSURJSA-N	C(=C\C(=O)O)\C(=O)O	-0.3	C01384	Organic acids and derivatives	Carboxylic acids and derivatives	Dicarboxylic acids and derivatives	1.22199e+07	2.09241e+07	2.65373e+06	4.2162e+06
8.06_330.2398n	9S,10S,11R-trihydroxy-12Z-octadecenoic acid	C18H34O5	8.0575	-2.41644	329.233	neg	M-H, 2M-H, M+Cl	16061050	JHGVFGJXFVIYSM-BSHMHQBXSA-N	CCCCC/C=C\[C@H]([C@H]([C@H](CCCCCCCC(=O)O)O)O)O	3.5		Lipids and lipid-like molecules	Fatty Acyls	Fatty acids and conjugates	1.19378e+07	7.68124e+07	2.09876e+07	1.59671e+07
8.80_161.0240m/z	3 Hydroxycoumarin	C9H6O3	8.80318	-2.37124	161.024	neg	M-H	13650	MJKVTPMWOKAVMS-UHFFFAOYSA-N	C1=CC=C2C(=C1)C=C(C(=O)O2)O	1.8		Phenylpropanoids and polyketides	Coumarins and derivatives	Hydroxycoumarins	1.05291e+07	1.35239e+07	6.06626e+06	1.43463e+07
3.04_153.1271m/z	(R)-Camphor	C10H16O	3.04152	-2.09831	153.127	pos	M+H	159055	DSSYKIVIOFKYAU-XCBNKYQSSA-N	C[C@@]12CC[C@@H](C1(C)C)CC2=O	2.2	C00808	Lipids and lipid-like molecules	Prenol lipids	Monoterpenoids	1.02211e+07	1.68881e+07	9.81976e+06	2.19658e+07
1.03_243.0629m/z	Uridine	C9H12N2O6	1.02993	2.73513	243.063	neg	M-H	6029	DRTQHJPVMGBUCF-XVFCMESISA-N	C1=CN(C(=O)NC1=O)[C@H]2[C@@H]([C@@H]([C@H](O2)CO)O)O	-2	C00299	Nucleosides, nucleotides, and analogues	Pyrimidine nucleosides		1.01093e+07	2.52358e+06	1.8301e+07	1.36648e+06
1.90_165.0785n	D-phenylalanine	C9H11NO2	1.90188	-2.71996	164.071	neg	M-H, 2M-H	71567	COLNVLDHVKWLRT-MRVPVSSYSA-N	C1=CC=C(C=C1)C[C@H](C(=O)O)N	-1.5	C02265	Organic acids and derivatives	Carboxylic acids and derivatives	Amino acids, peptides, and analogues	9.85736e+06	9.79086e+06	9.29983e+06	3.19059e+06
0.88_226.9958m/z	D-threo-Isocitric acid	C6H8O7	0.880417	-3.11901	226.996	neg	M+Cl	5318532	ODBLHEXUDAPZAU-ZAFYKAAXSA-N	C([C@@H]([C@H](C(=O)O)O)C(=O)O)C(=O)O	-1.8	C00451	Organic acids and derivatives	Carboxylic acids and derivatives	Tricarboxylic acids and derivatives	8.68998e+06	1.93204e+06	5.7042e+06	2.9832e+06
6.15_505.0979m/z	Quercetin 3-O-beta-glucopyranosyl-6'-acetate	C23H22O13	6.1479	-1.76349	505.098	neg	M-H									8.6074e+06	7.48744e+06	4.26739e+06	1.08247e+06
10.79_519.3315n	PC(18:2/0:0)	C26H50NO7P	10.7931	-1.86819	520.339	pos	M+H, M+K, M+Na	497299	IHNKQIMGVNPMTC-RUZDIDTESA-N	CCCCCCCCCCCCCCCCCC(=O)OC[C@H](COP(=O)([O-])OCC[N+](C)(C)C)O	6.6		Lipids and lipid-like molecules	Glycerophospholipids	Glycerophosphocholines	7.8533e+06	6.60482e+06	3.39497e+06	1.04536e+07
7.04_428.1669n	1-[3-[(4-fluorophenyl)methyl]-4-oxothieno[3,2-d]pyrimidin-2-yl]-N-propylpiperidine-4-carboxamide	C22H25FN4O2S	7.04355	-3.04023	429.174	pos	M+Na, 2M+H, M+K, M+NH4, M+H, M+H-H2O, M+H-2H2O									7.20778e+06	1.83228e+06	9.70977e+06	758099
10.19_517.3158n	PC(18:3/0:0)	C26H48NO7P	10.1864	-1.99308	518.323	pos	M+H, M+Na	24779469	WKQNRCYKYCKESD-YVHLTTHBSA-N	CC/C=C\C/C=C\C/C=C\CCCCCCCC(=O)OC[C@H](COP(=O)([O-])OCC[N+](C)(C)C)O	4.3		Lipids and lipid-like molecules	Glycerophospholipids	Glycerophosphocholines	6.58911e+06	2.78064e+06	3.99933e+06	2.56269e+06
8.85_180.1146n	Dihydroactinidiolide	C11H16O2	8.84733	-2.51107	181.122	pos	M+H, M+ACN+H, M+H-H2O, M+H-2H2O	27209	IMKHDCBNRDRUEB-UHFFFAOYSA-N	CC1(CCCC2(C1=CC(=O)O2)C)C	2.2		Organoheterocyclic compounds	Benzofurans		5.66949e+06	2.43386e+06	1.00977e+07	1.0972e+06
6.15_479.0813m/z	Quercetin 3-O-glucuronide	C21H18O13	6.1472	-1.49902	479.081	pos	M+H	5274585	DUBCCGAQYVUYEU-ZUGPOPFOSA-N	C1=CC(=C(C=C1C2=C(C(=O)C3=C(C=C(C=C3O2)O)O)O[C@H]4[C@@H]([C@H]([C@@H]([C@H](O4)C(=O)O)O)O)O)O)O	0.6		Phenylpropanoids and polyketides	Flavonoids	Flavonoid glycosides	5.08425e+06	1.28214e+06	923891	50047.5
2.30_146.1172m/z	N-Methylisoleucine	C7H15NO2	2.29983	-2.36422	146.117	pos	M+H	560437	KSPIYJQBLVDRRI-UHFFFAOYSA-N	CCC(C)C(C(=O)O)NC	-1.8		Organic acids and derivatives	Carboxylic acids and derivatives	Amino acids, peptides, and analogues	4.70402e+06	4.73167e+06	2.07034e+06	175273
1.23_191.0193m/z	Citrate	C6H8O7	1.2276	-2.38215	191.019	neg	M-H	31348	KRKNYBCHXYNGOX-UHFFFAOYSA-K	C(C(=O)[O-])C(CC(=O)[O-])(C(=O)[O-])O	0.2	C00158	Organic acids and derivatives	Carboxylic acids and derivatives	Tricarboxylic acids and derivatives	4.53815e+06	1.02697e+07	3.72264e+06	4.0153e+06
11.40_834.5282m/z	GPSer(22:6/18:0)	C46H78NO10P	11.4002	-0.967084	834.528	neg	M-H									3.8708e+06	6.27782e+06	3.71309e+06	6.10745e+06
6.16_551.1021m/z	Quercetin 3-O-malonylglucoside	C24H22O15	6.15927	-1.81801	551.102	pos	M+H	5282159	NBQPHANHNTWDML-UJKBSQBPSA-N	C1=CC(=C(C=C1C2=C(C(=O)C3=C(C=C(C=C3O2)O)O)O[C@H]4[C@@H]([C@H]([C@@H]([C@H](O4)COC(=O)CC(=O)O)O)O)O)O)O	0.1	C12638	Phenylpropanoids and polyketides	Flavonoids	Flavonoid glycosides	3.74275e+06	3.59907e+06	2.25618e+06	499271
6.60_493.1331m/z	6-Hydroxyluteolin 6,3'-dimethyl ether 7-glucoside	C23H24O12	6.60338	-1.84436	493.133	pos	M+H	44258501	YFZSQPRYLBGYKE-SLYRBRRESA-N	COC1=C(C=CC(=C1)C2=CC(=O)C3=C(C(=C(C=C3O2)O[C@H]4C([C@H]([C@@H](C(O4)CO)O)O)O)OC)O)O	0.8		Phenylpropanoids and polyketides	Flavonoids	Flavonoid glycosides	3.64115e+06	9.00116e+06	1.62963e+06	227934
5.72_927.1822m/z	Quercetin-3-O-glucoside	C21H20O12	5.7212	-1.56426	927.182	neg	2M-H	22630387	RPVIQWDFJPYNJM-UHFFFAOYSA-N	C1=CC(=C(C=C1C2=C(C(=O)C3=C(C=C(C=C3O2)O)O)OC4C(C(C(C(O4)CO)O)O)O)O)OC5C(C(C(C(O5)CO)O)O)O	-1.4	C05623	Phenylpropanoids and polyketides	Flavonoids	Flavonoid glycosides	3.62225e+06	1.869e+06	2.25747e+06	20500.5
5.76_303.0492m/z	quercetin	C15H10O7	5.75683	-2.36778	303.049	pos	M+H	5280343	REFJWTPEDVJJIY-UHFFFAOYSA-N	C1=CC(=C(C=C1C2=C(C(=O)C3=C(C=C(C=C3O2)O)O)O)O)O	1.5	C00389	Phenylpropanoids and polyketides	Flavonoids	Flavones	3.36681e+06	2.22585e+06	2.04341e+06	350173
10.20_351.2521m/z	(E)-5-(1,2,4a,5-tetramethyl-7-oxo-3,4,8,8a-tetrahydro-2H-naphthalen-1-yl)-3-methylpent-2-enoic acid	C20H30O3	10.1988	-2.80631	351.252	pos	M+CH3OH+H	13918478	SLMFLTPPPXRYHP-JLHYYAGUSA-N	CC1CCC2(C(C1(C)CC/C(=C/C(=O)O)/C)CC(=O)C=C2C)C	4.8		Lipids and lipid-like molecules	Prenol lipids	Diterpenoids	3.34292e+06	1.60728e+06	3.52939e+06	731891
1.03_86.0968m/z	Piperidine	C5H11N	1.03448	4.31138	86.0968	pos	M+H	8082	NQRYJNQNLNOLGT-UHFFFAOYSA-N	C1CCNCC1	0.8	C01746	Organoheterocyclic compounds	Piperidines		3.15115e+06	2.48128e+06	3.48408e+06	2.16173e+06
5.23_626.1471n	Quercetin-3,4'-O-di-beta-glucoside	C27H30O17	5.22565	-1.89696	627.154	pos	M+H, M+Na	22630387	RPVIQWDFJPYNJM-UHFFFAOYSA-N	C1=CC(=C(C=C1C2=C(C(=O)C3=C(C=C(C=C3O2)O)O)OC4C(C(C(C(O4)CO)O)O)O)O)OC5C(C(C(C(O5)CO)O)O)O	-1.4	C05623	Phenylpropanoids and polyketides	Flavonoids	Flavonoid glycosides	3.1011e+06	134666	77583.9	0
11.24_495.3314n	PC(16:0/0:0)	C24H50NO7P	11.2351	-2.13144	496.339	pos	M+H, M+Na	460602	ASWBNKHCZGQVJV-HSZRJFAPSA-N	CCCCCCCCCCCCCCCC(=O)OC[C@H](COP(=O)([O-])OCC[N+](C)(C)C)O	5.6		Lipids and lipid-like molecules	Glycerophospholipids	Glycerophosphocholines	3.08104e+06	1.3626e+06	1.58369e+06	2.34405e+06
3.66_153.0189m/z	Protocatechuic acid	C7H6O4	3.65662	-2.68206	153.019	neg	M-H	72	YQUVCSBJEUQKSH-UHFFFAOYSA-N	C1=CC(=C(C=C1C(=O)O)O)O	1.1	C00230	Benzenoids	Benzene and substituted derivatives	Benzoic acids and derivatives	3.02463e+06	6.42078e+06	5.57092e+06	1.31434e+06
6.23_479.1174m/z	Isorhamnetin-3-galactoside	C22H22O12	6.22755	-2.08289	479.117	pos	M+H	13245586	CQLRUIIRRZYHHS-UHFFFAOYSA-N	COC1=C(C=CC(=C1)C2=C(C(=O)C3=C(C=C(C=C3O2)O)O)OC4C(C(C(C(O4)CO)O)O)O)O	0.7		Phenylpropanoids and polyketides	Flavonoids	Flavonoid glycosides	2.84809e+06	3.14695e+06	1.61035e+06	462888
0.81_133.0739n	N-Methylthreonine	C5H11NO3	0.8108	0.285119	116.071	pos	M+H-H2O, M+H	7010355	CCAIIPMIAFGKSI-DMTCNVIQSA-N	C[C@H]([C@@H](C(=O)O)NC)O	-3.1		Organic acids and derivatives	Carboxylic acids and derivatives	Amino acids, peptides, and analogues	2.6702e+06	1.76953e+06	1.8371e+06	1.87345e+06
5.47_610.1523n	Kaempferol 3-O-gentiobioside	C27H30O16	5.46925	-1.75775	611.16	pos	M+H, M+Na	9960512	BITPRCODIALMOV-DEFKTLOSSA-N	C1=CC(=CC=C1C2=C(C(=O)C3=C(C=C(C=C3O2)O)O)O[C@H]4[C@@H]([C@H]([C@@H]([C@H](O4)CO[C@H]5[C@@H]([C@H]([C@@H]([C@H](O5)CO)O)O)O)O)O)O)O	-1.4		Phenylpropanoids and polyketides	Flavonoids	Flavonoid glycosides	2.61233e+06	64774.4	184668	6076.17
0.91_133.0139m/z	malate	C4H6O5	0.91045	-2.75594	133.014	neg	M-H	525	BJEPYKJPYRNKOW-UHFFFAOYSA-N	C(C(C(=O)O)O)C(=O)O	-1.3	C00711	Organic acids and derivatives	Hydroxy acids and derivatives	Beta hydroxy acids and derivatives	2.59353e+06	5.31688e+06	1.20669e+06	2.40439e+06
5.57_611.1598m/z	RUTIN	C27H30O16	5.56797	-1.3909	611.16	pos	M+H	5280805	IKGXIBQEEMLURG-NVPNHPEKSA-N	C[C@H]1[C@@H]([C@H]([C@H]([C@@H](O1)OC[C@@H]2[C@H]([C@@H]([C@H]([C@@H](O2)OC3=C(OC4=CC(=CC(=C4C3=O)O)O)C5=CC(=C(C=C5)O)O)O)O)O)O)O)O	-1.3	C05625	Phenylpropanoids and polyketides	Flavonoids	Flavonoid glycosides	2.54838e+06	891272	537098	85952
5.91_206.0817m/z	N-acetylphenylalanine	C11H13NO3	5.90983	-2.57456	206.082	neg	M-H	74839	CBQJSKKFNMDLON-JTQLQIEISA-N	CC(=O)N[C@@H](CC1=CC=CC=C1)C(=O)O	0.6		Organic acids and derivatives	Carboxylic acids and derivatives	Amino acids, peptides, and analogues	2.01266e+06	3.03531e+06	1.90167e+06	1.61768e+06
5.47_287.0543m/z	kaempferol	C15H10O6	5.46925	-2.38164	287.054	pos	M+H	5280863	IYRMWMYZSQPJKC-UHFFFAOYSA-N	C1=CC(=CC=C1C2=C(C(=O)C3=C(C=C(C=C3O2)O)O)O)O	1.9	C05903	Phenylpropanoids and polyketides	Flavonoids	Flavones	2.00428e+06	63477.3	150364	12849.9
5.47_172.0975m/z	N-Acetyl-leucine	C8H15NO3	5.46552	-2.29244	172.098	neg	M-H	70912	WXNXCEHXYPACJF-ZETCQYMHSA-N	CC(C)C[C@@H](C(=O)O)NC(=O)C	0.5	C02710	Organic acids and derivatives	Carboxylic acids and derivatives	Amino acids, peptides, and analogues	1.9913e+06	2.52061e+06	1.76952e+06	1.01182e+06
6.48_187.0971m/z	Azelaic acid	C9H16O4	6.4755	-2.75232	187.097	neg	M-H	2266	BDJRBEYXGGNYIS-UHFFFAOYSA-N	C(CCCC(=O)O)CCCC(=O)O	1.6	C08261	Lipids and lipid-like molecules	Fatty Acyls	Fatty acids and conjugates	1.97081e+06	4.6382e+06	1.45673e+06	5.95678e+06
0.86_213.0167m/z	D-(-)-Gulono-gamma-lactone	C6H10O6	0.861783	-2.58163	213.017	neg	M+Cl									1.90054e+06	5.24526e+06	3.39252e+06	2.03733e+06
5.40_165.0189m/z	Phthalic acid	C8H6O4	5.40348	-2.80619	165.019	neg	M-H	1017	XNGIFLGASWRNHJ-UHFFFAOYSA-N	C1=CC=C(C(=C1)C(=O)O)C(=O)O	0.7	C01606	Benzenoids	Benzene and substituted derivatives	Benzoic acids and derivatives	1.77546e+06	1.25724e+06	1.59716e+06	631576
6.21_477.1024m/z	Isorhamnetin-3-O-glucoside	C22H22O12	6.21292	-3.07228	477.102	neg	M-H	5318645	CQLRUIIRRZYHHS-LFXZADKFSA-N	COC1=C(C=CC(=C1)C2=C(C(=O)C3=C(C=C(C=C3O2)O)O)O[C@H]4[C@@H]([C@H]([C@@H]([C@H](O4)CO)O)O)O)O	0.7	C22589	Phenylpropanoids and polyketides	Flavonoids	Flavonoid glycosides	1.54845e+06	2.36215e+06	597965	371547
7.06_163.0761m/z	Isoeugenol	C10H12O2	7.05685	-2.27488	163.076	neg	M-H	853433	BJIOGJUNALELMI-ONEGZZNKSA-N	C/C=C/C1=CC(=C(C=C1)O)OC	2.6	C10469	Benzenoids	Phenols	Methoxyphenols	1.53701e+06	312297	2.19324e+06	184956
6.07_516.1258n	3,5-Di-O-caffeoylquinic acid	C25H24O12	6.06892	-1.89012	517.133	pos	M+H, M+Na	6474310	KRZBCHWVBQOTNZ-RDJMKVHDSA-N	C1C(C[C@H](C([C@@H]1OC(=O)/C=C/C2=CC(=C(C=C2)O)O)O)OC(=O)/C=C/C3=CC(=C(C=C3)O)O)(O)C(=O)O	1.5		Organic oxygen compounds	Organooxygen compounds	Alcohols and polyols	1.29837e+06	169316	1.11096e+06	84343.4
5.09_177.0189m/z	Esculetin	C9H6O4	5.08508	-2.41614	177.019	neg	M-H	5281416	ILEDWLMCKZNDJK-UHFFFAOYSA-N	C1=CC(=O)OC2=CC(=C(C=C21)O)O	1.2	C09263	Phenylpropanoids and polyketides	Coumarins and derivatives	Hydroxycoumarins	1.21407e+06	1.74801e+06	1.02995e+06	1.62368e+06
0.81_103.0637n	gamma-Aminobutyric acid	C4H9NO2	0.8108	3.84825	104.071	pos	M+H-H2O, M+H	119	BTCSSZJGUNDROE-UHFFFAOYSA-N	C(CC(=O)O)CN	-3.2	C00334	Organic acids and derivatives	Carboxylic acids and derivatives	Amino acids, peptides, and analogues	1.19757e+06	962844	1.08866e+06	1.39518e+06
1.34_152.0564m/z	Guanine	C5H5N5O	1.34035	-1.80985	152.056	pos	M+H	135398634	UYTPUPDQBNUYGX-UHFFFAOYSA-N	C1=NC2=C(N1)C(=O)NC(=N2)N	-1.1	C00242	Organoheterocyclic compounds	Imidazopyrimidines	Purines and purine derivatives	1.19348e+06	2.41058e+06	1.78555e+06	201728
3.63_118.0651m/z	2-Aminoacetophenone	C8H9NO	3.6343	0.0660587	118.065	pos	M+H-H2O	11952	HEQOJEGTZCTHCF-UHFFFAOYSA-N	C1=CC=C(C=C1)C(=O)CN	0.8		Organic oxygen compounds	Organooxygen compounds	Carbonyl compounds	1.19181e+06	813736	709961	697592
7.02_297.0760m/z	5-O-Methylbiochanin A	C17H14O5	7.01782	-2.69387	297.076	neg	M-H	14308334	JQQULYXWXRNRAX-UHFFFAOYSA-N	COC1=CC=C(C=C1)C2=COC3=C(C2=O)C(=CC(=C3)O)OC	2.8		Phenylpropanoids and polyketides	Isoflavonoids	O-methylated isoflavonoids	1.15488e+06	183856	109055	2.09342e+07
8.16_467.2265m/z	Glu Arg Tyr	C20H30N6O7	8.15537	3.58334	467.227	pos	M+H	10181671	WVRUKYLYMFGKAN-IHRRRGAJSA-N	C1=CC(=CC=C1C[C@@H](C(=O)N[C@@H](CCC(=O)O)C(=O)N[C@@H](CCC(=O)O)C(=O)O)N)O	-4.8		Organic acids and derivatives	Carboxylic acids and derivatives	Amino acids, peptides, and analogues	1.10614e+06	501845	1.31382e+06	72972.5
1.65_281.1489m/z	Val Tyr	C14H20N2O4	1.65085	-2.28433	281.149	pos	M+H	7009555	VEYJKJORLPYVLO-RYUDHWBXSA-N	CC(C)[C@@H](C(=O)N[C@@H](CC1=CC=C(C=C1)O)C(=O)O)N	-2.5		Organic acids and derivatives	Carboxylic acids and derivatives	Amino acids, peptides, and analogues	1.10192e+06	627355	408504	1.63986e+06
7.81_466.2194n	4-(4-benzyl-2,3-dioxopiperazin-1-yl)-N-(2,5-dimethoxyphenyl)piperidine-1-carboxamide	C25H30N4O5	7.80528	-4.81793	467.227	pos	M+H-2H2O, M+H-H2O, M+H									1.09166e+06	660372	1.44352e+06	103931
1.57_283.0676m/z	xanthosine	C10H12N4O6	1.57432	-2.90081	283.068	neg	M-H	64959	UBORTCNDUKBEOP-UUOKFMHZSA-N	C1=NC2=C(N1[C@H]3[C@@H]([C@@H]([C@H](O3)CO)O)O)NC(=O)NC2=O	-2.4	C01762	Nucleosides, nucleotides, and analogues	Purine nucleosides		1.08067e+06	456129	396332	751565
4.76_403.1598m/z	Diethyloxalpropionate	C9H14O5	4.76215	-2.79586	403.16	neg	2M-H	97750	OQOCQBJWOCRPQY-UHFFFAOYSA-N	CCOC(=O)C(C)C(=O)C(=O)OCC	1.3	C04067	Organic acids and derivatives	Keto acids and derivatives	Beta-keto acids and derivatives	1.05683e+06	2.21628e+06	3.7345e+06	2.92379e+06
10.87_310.2136n	13S-Hydroperoxy-9Z,11E,15Z-octadecatrienoic acid	C18H30O4	10.8661	-2.47823	293.21	pos	M+H-H2O, M+H, M+ACN+H	5497123	UYQGVDXDXBAABN-FQSPHKRJSA-N	CC/C=C\C[C@@H](/C=C/C=C\CCCCCCCC(=O)O)OO	4.8		Lipids and lipid-like molecules	Fatty Acyls	Lineolic acids and derivatives	1.05319e+06	2.78093e+06	1.09889e+06	1.03723e+06
2.52_218.1027m/z	Pantothenic acid	C9H17NO5	2.52208	-2.97234	218.103	neg	M-H	6613	GHOKWGTUZJEAQD-ZETCQYMHSA-N	CC(C)(CO)[C@H](C(=O)NCCC(=O)O)O	-1.1	C00864	Organic oxygen compounds	Organooxygen compounds	Alcohols and polyols	967857	1.17698e+06	488507	1.20744e+06
6.17_449.1068m/z	Cynaroside	C21H20O11	6.16943	-2.30575	449.107	pos	M+H	5280637	PEFNSGRTCBGNAN-QNDFHXLGSA-N	C1=CC(=C(C=C1C2=CC(=O)C3=C(C=C(C=C3O2)O[C@H]4[C@@H]([C@H]([C@@H]([C@H](O4)CO)O)O)O)O)O)O	0.5	C03951	Phenylpropanoids and polyketides	Flavonoids	Flavonoid glycosides	931841	565670	794104	137466
4.62_160.0521n	2,6-Dihydroxynaphthalene	C10H8O2	4.6153	-2.1384	193.086	pos	M+H, 2M+ACN+H, M+CH3OH+H	93552	MNZMMCVIXORAQL-UHFFFAOYSA-N	C1=CC2=C(C=CC(=C2)O)C=C1O	2.3	C16213	Benzenoids	Naphthalenes	Naphthols and derivatives	925483	1.4666e+06	488401	228919
6.13_299.0189m/z	Irigenol	C15H10O8	6.12753	-2.71522	299.019	neg	M-H2O-H									904435	904383	151485	388530
8.58_235.1687m/z	Curcumenol	C15H22O2	8.5798	-2.27386	235.169	pos	M+H	167812	ISFMXVMWEWLJGJ-NZBPQXDJSA-N	C[C@H]1CC[C@@H]2[C@]13CC(=C(C)C)[C@](O3)(C=C2C)O	2.2	C16942	Lipids and lipid-like molecules	Prenol lipids	Sesquiterpenoids	891443	480939	1.3266e+06	835773
9.77_312.2293n	9-Hydroxy-10,12-octadecadienoic acid	C18H32O4	9.76813	-2.333	311.222	neg	M-H2O-H, M-H	5282945	NPDSHTNEKLQQIJ-SIGMCMEVSA-N	CCCCC/C=C/C=C/C(CCCCCCCC(=O)O)O	5.3	C21923	Lipids and lipid-like molecules	Fatty Acyls	Lineolic acids and derivatives	867232	1.90147e+06	1.45145e+06	733668
5.05_377.1447m/z	Flavin mononucleotide	C17H20N4O6	5.05055	-2.40482	377.145	pos	M+H	643976	FVTCRASFADXXNN-SCRDCRAPSA-N	CC1=CC2=C(C=C1C)N(C3=NC(=O)NC(=O)C3=N2)C[C@@H]([C@@H]([C@@H](COP(=O)(O)O)O)O)O	-2.6	C00061	Nucleosides, nucleotides, and analogues	Flavin nucleotides		858758	1.13145e+06	1.13413e+06	703227
7.09_359.0763m/z	Centaureidin	C18H16O8	7.08875	-2.50687	359.076	neg	M-H	5315773	BZXULYMZYPRZOG-UHFFFAOYSA-N	COC1=C(C=C(C=C1)C2=C(C(=O)C3=C(O2)C=C(C(=C3O)OC)O)OC)O	2.8		Phenylpropanoids and polyketides	Flavonoids	O-methylated flavonoids	831439	2.21322e+06	372124	448952
2.58_282.1191m/z	2'-O-Methyladenosine	C11H15N5O4	2.58262	-2.20729	282.119	pos	M+H	102213	FPUGCISOLXNPPC-IOSLPCCCSA-N	CO[C@@H]1[C@@H]([C@H](O[C@H]1N2C=NC3=C(N=CN=C32)N)CO)O	-0.5		Nucleosides, nucleotides, and analogues	Purine nucleosides		812387	2.76471e+06	2.30076e+06	203760
4.21_179.0346m/z	caffeic acid	C9H8O4	4.20835	-2.33571	179.035	neg	M-H	689043	QAIPRVGONGVQAS-DUXPYHPUSA-N	C1=CC(=C(C=C1/C=C/C(=O)O)O)O	1.2	C01481	Phenylpropanoids and polyketides	Cinnamic acids and derivatives	Hydroxycinnamic acids and derivatives	804797	655216	1.25306e+06	249591
1.03_284.0983m/z	Guanosine	C10H13N5O5	1.03448	-2.41588	284.098	pos	M+H	135398635	NYHBQMYGNKIUIF-UUOKFMHZSA-N	C1=NC2=C(N1[C@H]3[C@@H]([C@@H]([C@H](O3)CO)O)O)N=C(NC2=O)N	-1.9	C00387	Nucleosides, nucleotides, and analogues	Purine nucleosides		804290	1.45432e+06	1.2109e+06	162729
6.11_163.0396m/z	Phenylpyruvic acid	C9H8O3	6.10918	-2.62419	163.04	neg	M-H	997	BTNMPGBKDVTSJY-UHFFFAOYSA-N	C1=CC=C(C=C1)CC(=O)C(=O)O	1.3	C00166	Benzenoids	Benzene and substituted derivatives	Phenylpyruvic acid derivatives	738813	490455	617629	117735
5.10_581.1490m/z	4-(3,4-Dihydroxyphenyl)-7-hydroxy-2-oxo-2H-chromen-5-yl 6-O-D-xylopyranosyl-beta-D-glucopyranoside	C26H28O15	5.09542	-1.84828	581.149	pos	M+H									717173	0	0	4227.51
7.27_303.0491m/z	Tricetin	C15H10O7	7.27465	-2.59982	303.049	pos	M+H	5281701	ARSRJFRKVXALTF-UHFFFAOYSA-N	C1=C(C=C(C(=C1O)O)O)C2=CC(=O)C3=C(C=C(C=C3O2)O)O	1	C10192	Phenylpropanoids and polyketides	Flavonoids	Flavones	623447	1.83287e+06	145725	46932.2
7.92_230.2474m/z	N,N-Dimethyldodecylamine N-oxide	C14H31NO	7.92032	-2.07058	230.247	pos	M+H	15433	SYELZBGXAIXKHU-UHFFFAOYSA-N	CCCCCCCCCCCC[N+](C)(C)[O-]	5.3		Organic nitrogen compounds	Organonitrogen compounds	Aminoxides	622472	1.39896e+06	642368	1.0678e+06
6.43_133.1010m/z	Cumic alcohol	C10H14O	6.42505	-1.33619	133.101	pos	M+H-H2O	325	OIGWAXDAPKFNCQ-UHFFFAOYSA-N	CC(C)C1=CC=C(C=C1)CO	2.3	C06576	Lipids and lipid-like molecules	Prenol lipids	Monoterpenoids	619803	284865	929773	361427
6.74_238.1928n	4(15)-Selinene-11,12-diol	C15H26O2	6.74138	-2.00886	221.19	pos	M+H-H2O, M+H									619200	244941	842271	30796
5.47_449.1073m/z	Luteolin 4'-glucoside	C21H20O11	5.46925	-1.19107	449.107	pos	M+H	12304737	UHNXUSWGOJMEFO-UHFFFAOYSA-N	C1=CC(=C(C=C1C2=CC(=O)C3=C(C=C(C=C3O2)O)O)O)OC4C(C(C(C(O4)CO)O)O)O	0.5		Phenylpropanoids and polyketides	Flavonoids	Flavonoid glycosides	612683	28560.8	73072.4	20641.4
3.67_197.0450m/z	Syringic acid	C9H10O5	3.66838	-2.68812	197.045	neg	M-H	10742	JMSVCTWVEWCHDZ-UHFFFAOYSA-N	COC1=CC(=CC(=C1O)OC)C(=O)O	1	C10833	Benzenoids	Benzene and substituted derivatives	Benzoic acids and derivatives	594468	401415	669301	336837
2.27_156.0662m/z	N-Acetyl-proline	C7H11NO3	2.26707	-2.45606	156.066	neg	M-H	322640	GNMSLDIYJOSUSW-UHFFFAOYSA-N	CC(=O)N1CCCC1C(=O)O	-0.7		Organic acids and derivatives	Carboxylic acids and derivatives	Amino acids, peptides, and analogues	594399	487210	581698	238910
5.85_151.0397m/z	Vanillin	C8H8O3	5.85038	-2.53617	151.04	neg	M-H	1183	MWOOGOJBHIARFG-UHFFFAOYSA-N	COC1=C(C=CC(=C1)C=O)O	1.2	C00755	Benzenoids	Phenols	Methoxyphenols	575642	807957	298769	1.39355e+06
1.03_181.0735n	L-Tyrosine	C9H11NO3	1.02993	-2.38027	180.066	neg	M-H, M+Cl	6057	OUYCCCASQSFEME-QMMMGPOBSA-N	C1=CC(=CC=C1C[C@@H](C(=O)O)N)O	-2.3	C00082	Organic acids and derivatives	Carboxylic acids and derivatives	Amino acids, peptides, and analogues	572694	465967	443568	343351
11.69_294.2187n	9-Oxo-10E,12Z-octadecadienoic acid	C18H30O3	11.6911	-2.54018	295.226	pos	M+H, M+Na	9839084	LUZSWWYKKLTDHU-ZJHFMPGASA-N	CCCCC/C=C\C=C\C(=O)CCCCCCCC(=O)O	5.2		Lipids and lipid-like molecules	Fatty Acyls	Lineolic acids and derivatives	567947	1.20133e+06	516298	781336
4.98_251.1385m/z	Feruloyl allylamine	C13H15NO3	4.9849	-2.11476	251.139	pos	M+NH4	139291976	NAYMCRXFMBIDTH-FNORWQNLSA-N	COC1=C(C=CC(=C1)/C=C/C(=O)NCC=C)O	1.9					550801	24412.9	30250.2	0
10.75_476.2772m/z	PE(18:2/0:0)	C23H44NO7P	10.7501	-2.16845	476.277	neg	M-H	9547068	BBYWOYAFBUOUFP-JOCHJYFZSA-N	CCCCCCCCCCCCCCCCCC(=O)OC[C@H](COP(=O)(O)OCCN)O	3.4		Lipids and lipid-like molecules	Glycerophospholipids	Glycerophosphoethanolamines	537741	557562	487512	706048
6.33_291.0968m/z	Malonyltryptophan	C14H14N2O5	6.32682	-2.50433	291.097	pos	M+H	5199636	OVEAWSPZRGBTSS-UHFFFAOYSA-N	C1=CC=C2C(=C1)C(=CN2)CC(C(=O)O)NC(=O)CC(=O)O	0.3		Organic acids and derivatives	Carboxylic acids and derivatives	Amino acids, peptides, and analogues	537171	637176	145248	25893.4
1.19_129.0425n	L-Pyroglutamic acid	C5H7NO3	1.19307	-0.717222	130.05	pos	M+H, M+ACN+H	7405	ODHCTXKNWHHXJC-VKHMYHEASA-N	C1CC(=O)N[C@@H]1C(=O)O	-0.8	C01879	Organic acids and derivatives	Carboxylic acids and derivatives	Amino acids, peptides, and analogues	527710	701083	372392	1.97774e+06
3.63_174.0790n	Indole-3-acetamide	C10H10N2O	3.6343	-1.91949	175.086	pos	M+H-H2O, M+H	397	ZOAMBXDOGPRZLP-UHFFFAOYSA-N	C1=CC=C2C(=C1)C(=CN2)CC(=O)N	0.8	C02693	Organoheterocyclic compounds	Indoles and derivatives	Indoles	502670	494888	414063	548204
0.82_243.0850n	Cytidine	C9H13N3O5	0.821567	-1.985	244.092	pos	M+H, 2M+Na, 2M+H	6175	UHDGCWIWMRVCDJ-XVFCMESISA-N	C1=CN(C(=O)N=C1N)[C@H]2[C@@H]([C@@H]([C@H](O2)CO)O)O	-2.1	C00475	Nucleosides, nucleotides, and analogues	Pyrimidine nucleosides		499985	1.28547e+06	855177	971251
6.69_137.0240m/z	p-Hydroxybenzoic acid	C7H6O3	6.6949	-2.71861	137.024	neg	M-H	135	FJKROLUGYXJWQN-UHFFFAOYSA-N	C1=CC(=CC=C1C(=O)O)O	1.6	C00156	Benzenoids	Benzene and substituted derivatives	Benzoic acids and derivatives	484925	665866	1.13699e+06	295408
3.94_197.0450m/z	2-Hydroxy-3,4-Dimethoxybenzoic Acid	C9H10O5	3.93693	-2.6734	197.045	neg	M-H	79737	CJFQIVAOBBTJCI-UHFFFAOYSA-N	COC1=C(C(=C(C=C1)C(=O)O)O)OC	1.9		Benzenoids	Benzene and substituted derivatives	Benzoic acids and derivatives	479593	363294	646693	300035
5.65_503.1901m/z	Olivil 4'-O-Glucoside	C26H34O12	5.64507	-2.08259	503.19	pos	M+H-2H2O	14033815	SXGSYHDLSPXCMU-CTQTXEDXSA-N	COC1=C(C=CC(=C1)C[C@]2(CO[C@@H]([C@H]2CO)C3=CC(=C(C=C3)O)OC)O)O[C@H]4[C@@H]([C@H]([C@@H]([C@H](O4)CO)O)O)O	0.1		Lignans, neolignans and related compounds	Lignan glycosides		476680	351967	112141	151781
6.53_160.1096n	(R)-2-Hydroxycaprylic acid	C8H16O3	6.53118	-1.97647	141.092	neg	M-H2O-H, M-H	5312860	JKRDADVRIYVCCY-SSDOTTSWSA-N	CCCCCC[C@H](C(=O)O)O	2		Lipids and lipid-like molecules	Fatty Acyls	Fatty acids and conjugates	460868	465033	505964	80129
5.10_167.0345m/z	Vanillic acid	C8H8O4	5.0956	-2.59883	167.035	neg	M-H	8468	WKOLLVMJNQIZCI-UHFFFAOYSA-N	COC1=C(C=CC(=C1)C(=O)O)O	1.4	C06672	Benzenoids	Benzene and substituted derivatives	Benzoic acids and derivatives	459867	587822	973534	481185
8.92_160.0521n	4-Methylcoumarin	C10H8O2	8.91708	-2.06434	193.086	pos	M+H, M+CH3OH+H	11833	PSGQCCSGKGJLRL-UHFFFAOYSA-N	CC1=CC(=O)OC2=CC=CC=C12	2.3		Phenylpropanoids and polyketides	Coumarins and derivatives		445089	84273.8	45252.9	2.08661e+06
7.60_233.1531m/z	Costunolide	C15H20O2	7.6033	-2.29773	233.153	pos	M+H	5281437	HRYLQFBHBWLLLL-AHNJNIBGSA-N	C/C/1=C\CC/C(=C/[C@@H]2[C@@H](CC1)C(=C)C(=O)O2)/C	2.1	C09382	Lipids and lipid-like molecules	Prenol lipids	Terpene lactones	434302	239960	669636	239846
3.46_346.1254n	4-Hydroxy-3,5-dimethoxybenzyl -D-glucopyranoside	C15H22O9	3.4634	-2.80323	369.115	pos	M+Na, 2M+Na, M+NH4									416278	426012	697340	137572
6.30_461.0717m/z	Kaempferol 3-glucuronoside	C21H18O12	6.30258	-1.88778	461.072	neg	M-H	22846027	FNTJVYCFNVUBOL-MBIBTLSJSA-N	C1=CC(=CC=C1C2=C(C(=O)C3=C(C=C(C=C3O2)O)O)OC4[C@@H]([C@H]([C@@H]([C@H](O4)C(=O)O)O)O)O)O	1		Phenylpropanoids and polyketides	Flavonoids	Flavonoid glycosides	391694	133048	16666.5	43291.9
1.53_252.1086m/z	Cordycepin	C10H13N5O3	1.53248	-1.95947	252.109	pos	M+H	6303	OFEZSBMBBKLLBJ-BAJZRUMYSA-N	C1[C@H](O[C@H]([C@@H]1O)N2C=NC3=C(N=CN=C32)N)CO	-1.2	C08431	Nucleosides, nucleotides, and analogues	Purine nucleosides	Purine 3'-deoxyribonucleosides	388174	492530	484670	88527.6
5.69_507.1123m/z	Quercetin 3-(6-O-acetyl-beta-glucoside)	C23H22O13	5.68698	-2.0337	507.112	pos	M+H	10006384	IGLUNMMNDNWZOA-LNNZMUSMSA-N	CC(=O)OC[C@@H]1[C@H]([C@@H]([C@H]([C@@H](O1)OC2=C(OC3=CC(=CC(=C3C2=O)O)O)C4=CC(=C(C=C4)O)O)O)O)O	0.4		Phenylpropanoids and polyketides	Flavonoids	Flavonoid glycosides	380504	102486	14458.7	4218.71
5.01_491.1175m/z	Cyanidin 3-(6''-acetylglucoside)	C23H22O12	5.00887	-1.78009	491.118	pos	M+H									376779	481701	2180.16	2991.77
5.61_207.0657m/z	Sinapaldehyde	C11H12O4	5.60717	-2.61742	207.066	neg	M-H	5280802	CDICDSOGTRCHMG-ONEGZZNKSA-N	COC1=CC(=CC(=C1O)OC)/C=C/C=O	1.4	C05610	Benzenoids	Phenols	Methoxyphenols	374329	821962	432090	229123
6.60_313.0710m/z	Dipteryxin	C17H14O6	6.6025	-2.44908	313.071	neg	M-H	44257265	BSXFDHHTXOAUGB-UHFFFAOYSA-N	COC1=CC=C(C=C1)C2=COC3=C(C(=C(C=C3C2=O)OC)O)O	2.4		Phenylpropanoids and polyketides	Isoflavonoids	O-methylated isoflavonoids	368710	484835	130428	2.95456e+06
5.23_281.1386m/z	Lactarorufin B	C15H22O5	5.22843	-3.03743	281.139	neg	M-H	182703	DBKIEMOKQWYZOA-UHFFFAOYSA-N	CC1(CC2C(C1)C(CC3=C(C2O)COC3=O)(C)O)CO	-0.5		Lipids and lipid-like molecules	Prenol lipids	Terpene lactones	365357	344509	268841	120137
1.03_123.0440m/z	4-Hydroxybenzaldehyde	C7H6O2	1.02553	-0.111172	123.044	pos	M+H	126	RGHHSNMVTDWUBI-UHFFFAOYSA-N	C1=CC(=CC=C1C=O)O	1.4	C00633	Organic oxygen compounds	Organooxygen compounds	Carbonyl compounds	341531	368037	306708	218210
6.40_135.1166m/z	Perilla alcohol	C10H16O	6.40278	-1.47049	135.117	pos	M+H-H2O	10819	NDTYTMIUWGWIMO-UHFFFAOYSA-N	CC(=C)C1CCC(=CC1)CO	2.1		Lipids and lipid-like molecules	Prenol lipids	Monoterpenoids	341319	167590	539490	140955
4.83_287.0542m/z	Scutellarein	C15H10O6	4.82712	-2.77809	287.054	pos	M+H	5281697	JVXZRQGOGOXCEC-UHFFFAOYSA-N	C1=CC(=CC=C1C2=CC(=O)C3=C(O2)C=C(C(=C3O)O)O)O	1.4	C10184	Phenylpropanoids and polyketides	Flavonoids	Flavones	326420	787496	18156.4	200952
1.36_126.0315n	1,3,5-Trihydroxybenzene	C6H6O3	1.36178	-1.7858	144.065	pos	M+NH4, M+ACN+H	359	QCDYQQDYXPDABM-UHFFFAOYSA-N	C1=C(C=C(C=C1O)O)O	0.2	C02183	Benzenoids	Phenols	Benzenetriols and derivatives	321445	246739	235050	293225
4.43_339.0712m/z	Esculin	C15H16O9	4.4256	-2.78897	339.071	neg	M-H	5281417	XHCADAYNFIFUHF-TVKJYDDYSA-N	C1=CC(=O)OC2=CC(=C(C=C21)O[C@H]3[C@@H]([C@H]([C@@H]([C@H](O3)CO)O)O)O)O	-0.6	C09264	Phenylpropanoids and polyketides	Coumarins and derivatives	Coumarin glycosides	312635	75528.6	246646	48812.7
5.14_427.1590m/z	N-methyl-N-(2-(pyridin-2-yl)ethyl)-2-(2,3,5-trimethyl-7-oxo-7H-furo[3,2-g]chromen-6-yl)acetamide	C24H24N2O4	5.13593	-9.58635	427.159	pos	M+Na									306713	19107.8	327535	3846.23
10.14_474.2617m/z	PE(18:3/0:0)	C23H42NO7P	10.1425	-2.00421	474.262	neg	M-H	9547068	BBYWOYAFBUOUFP-JOCHJYFZSA-N	CCCCCCCCCCCCCCCCCC(=O)OC[C@H](COP(=O)(O)OCCN)O	3.4		Lipids and lipid-like molecules	Glycerophospholipids	Glycerophosphoethanolamines	302690	110530	307834	114276
5.98_181.0502m/z	Syringaldehyde	C9H10O4	5.97972	-2.17245	181.05	neg	M-H	8655	KCDXJAYRVLXPFO-UHFFFAOYSA-N	COC1=CC(=CC(=C1O)OC)C=O	0		Benzenoids	Phenols	Methoxyphenols	298279	667200	570579	590484
0.85_174.1121m/z	swainsonine	C8H15NO3	0.848983	-1.88655	174.112	pos	M+H	51683	FXUAIOOAOAVCGD-WCTZXXKLSA-N	C1C[C@H]([C@@H]2[C@@H]([C@@H](CN2C1)O)O)O	-1.3	C10173	Organoheterocyclic compounds	Indolizidines		297973	294084	119313	212806
0.88_208.9853m/z	Dehydroascorbic acid	C6H6O6	0.880417	-3.21876	208.985	neg	M+Cl	440667	SBJKKFFYIZUCET-JLAZNSOCSA-N	C([C@@H]([C@@H]1C(=O)C(=O)C(=O)O1)O)O	-1	C05422	Organoheterocyclic compounds	Lactones	Gamma butyrolactones	291599	53045	209033	67252.9
7.16_263.1282m/z	(+)-Abscisic acid	C15H20O4	7.15988	-2.6738	263.128	neg	M-H	5280896	JLIDBLDQVAYHNE-YKALOCIXSA-N	CC1=CC(=O)CC([C@]1(/C=C/C(=C\C(=O)O)/C)O)(C)C	1.6	C06082	Lipids and lipid-like molecules	Prenol lipids	Sesquiterpenoids	287987	359858	167686	139807
14.81_857.5163n	GPSer(22:6/20:3)	C48H76NO10P	14.8067	-5.16601	858.524	pos	M+H, M+Na									285156	365382	247192	459536
3.65_109.0292m/z	Pyrocatechol	C6H6O2	3.64662	-3.08043	109.029	neg	M-H	289	YCIMNLLNPGFGHC-UHFFFAOYSA-N	C1=CC=C(C(=C1)O)O	0.9	C00090	Benzenoids	Phenols	Benzenediols	284243	500416	404072	212248
6.60_329.0659m/z	Jaceosidin	C17H14O7	6.6025	-2.48081	329.066	neg	M-H	5379096	GLAAQZFBFGEBPS-UHFFFAOYSA-N	COC1=C(C=CC(=C1)C2=CC(=O)C3=C(O2)C=C(C(=C3O)OC)O)O	1.7		Phenylpropanoids and polyketides	Flavonoids	O-methylated flavonoids	270769	559504	127991	89941.7
4.60_360.2119m/z	Leu Glu Val	C16H29N3O6	4.6033	-2.85705	360.212	pos	M+H	145456420	HVJVUYQWFYMGJS-GVXVVHGQSA-N	CC(C)C[C@@H](C(=O)N[C@@H](CCC(=O)O)C(=O)N[C@@H](C(C)C)C(=O)O)N	-3.4		Organic acids and derivatives	Carboxylic acids and derivatives	Amino acids, peptides, and analogues	266226	477679	634862	33740.2
8.13_325.2001m/z	(2E,4E)-12-hydroxy-13-(hydroxymethyl)-3,5,7-trimethyltetradeca-2,4-dienedioic acid	C18H30O6	8.1322	-2.43931	325.2	pos	M+H-H2O	10405119	QFZISQBFEIXWDM-UTLPMFLDSA-N	CC(CCCCC(C(CO)C(=O)O)O)C/C(=C/C(=C/C(=O)O)/C)/C	3.2		Lipids and lipid-like molecules	Fatty Acyls	Fatty acids and conjugates	264496	413177	504114	240741
1.90_346.0539m/z	3',5'-cyclic GMP	C10H12N5O7P	1.90113	-2.3812	346.054	pos	M+H	135398570	ZOOGRGPOEVQQDX-UUOKFMHZSA-N	C1[C@@H]2[C@H]([C@H]([C@@H](O2)N3C=NC4=C3N=C(NC4=O)N)O)OP(=O)(O1)O	-3.4	C00942	Nucleosides, nucleotides, and analogues	Purine nucleotides	Cyclic purine nucleotides	258921	352242	122125	36165.2
6.15_301.0336m/z	myricetin	C15H10O8	6.1472	-2.10564	301.034	pos	M+H-H2O	5281672	IKMDFBPHZNJCSN-UHFFFAOYSA-N	C1=C(C=C(C(=C1O)O)O)C2=C(C(=O)C3=C(C=C(C=C3O2)O)O)O	1.2	C10107	Phenylpropanoids and polyketides	Flavonoids	Flavones	256349	252568	68128.8	35724.2
5.84_227.0910m/z	Isoferulic Acid	C10H10O4	5.83575	-2.30847	227.091	pos	M+CH3OH+H	736186	QURCVMIEKCOAJU-HWKANZROSA-N	COC1=C(C=C(C=C1)/C=C/C(=O)O)O	1.5	C10470	Phenylpropanoids and polyketides	Cinnamic acids and derivatives	Hydroxycinnamic acids and derivatives	253948	363304	196376	349637
3.81_229.1541m/z	Leu Pro	C11H20N2O3	3.81435	-2.33177	229.154	pos	M+H									241192	632647	348452	66753.1
5.98_183.0649m/z	4-Hydroxy-3,5-dimethoxybenzaldehyde	C9H10O4	5.98267	-1.77566	183.065	pos	M+H	8655	KCDXJAYRVLXPFO-UHFFFAOYSA-N	COC1=CC(=CC(=C1O)OC)C=O	0	C02201	Benzenoids	Phenols	Methoxyphenols	240623	467663	471671	433796
8.27_248.1407n	1-Hydroxy-4(15),11(13)-eudesmadien-12,6-olide	C15H20O3	8.27448	-2.15154	249.148	pos	M+H, M+CH3OH+H									228090	159478	327944	185735
6.66_439.2294m/z	Thr Arg Tyr	C19H30N6O6	6.6587	-1.18485	439.229	pos	M+H									228026	255970	287391	0
5.27_289.1176m/z	Honokiol	C18H18O2	5.2673	-8.56735	289.118	pos	M+Na	72303	FVYXIJYOAGAUQK-UHFFFAOYSA-N	C=CCC1=CC(=C(C=C1)O)C2=CC(=C(C=C2)O)CC=C	5	C10630	Benzenoids	Benzene and substituted derivatives	Biphenyls and derivatives	226209	165506	198279	5111.32
10.79_303.1583m/z	Nordihydroguaiaretic acid	C18H22O4	10.7931	-2.54267	303.158	pos	M+H	4534	HCZKYJDFEPMADG-UHFFFAOYSA-N	CC(CC1=CC(=C(C=C1)O)O)C(C)CC2=CC(=C(C=C2)O)O	4.3	C10719	Lignans, neolignans and related compounds	Dibenzylbutane lignans		223748	135420	44047.4	986577
0.83_221.0896n	N-Acetyl-D-Glucosamine	C8H15NO6	0.831017	-1.70479	222.097	pos	M+H, M+H-2H2O	439174	OVRNDRQMDRJTHS-RTRLPJTCSA-N	CC(=O)N[C@@H]1[C@H]([C@@H]([C@H](OC1O)CO)O)O	-1.7	C00140	Organic oxygen compounds	Organooxygen compounds	Carbohydrates and carbohydrate conjugates	218641	432372	224284	225779
11.58_522.3543m/z	PC(18:1/0:0)	C26H52NO7P	11.5786	-2.06931	522.354	pos	M+H	16081932	YAMUFBLWGFFICM-PTGWMXDISA-N	CCCCCCCC/C=C\CCCCCCCC(=O)OC[C@H](COP(=O)([O-])OCC[N+](C)(C)C)O	5.7		Lipids and lipid-like molecules	Glycerophospholipids	Glycerophosphocholines	211948	148100	95960.6	289424
5.99_174.0556m/z	Indoleacetic acid	C10H9NO2	5.98958	-2.67928	174.056	neg	M-H	802	SEOVTRFCIGRIMH-UHFFFAOYSA-N	C1=CC=C2C(=C1)C(=CN2)CC(=O)O	1.4	C00954	Organoheterocyclic compounds	Indoles and derivatives	Indolyl carboxylic acids and derivatives	202855	403159	397333	141176
10.15_480.3076m/z	PC(15:1/0:0)	C23H46NO7P	10.1516	-1.7664	480.308	pos	M+H	24779458	RJZVWDTYEWCUAR-JOCHJYFZSA-N	CCCCCCCCCCCCCCC(=O)OC[C@H](COP(=O)([O-])OCC[N+](C)(C)C)O	5		Lipids and lipid-like molecules	Glycerophospholipids	Glycerophosphocholines	202717	211965	32855.6	315621
4.31_465.1026m/z	Glucodistylin	C21H22O12	4.31108	-2.68753	465.103	neg	M-H	14187088	FVQOMEDMFUMIMO-UHFFFAOYSA-N	C1=CC(=C(C=C1C2C(C(=O)C3=C(C=C(C=C3O2)O)O)OC4C(C(C(C(O4)CO)O)O)O)O)O	-0.1		Phenylpropanoids and polyketides	Flavonoids	Flavonoid glycosides	199861	421374	13134.1	87995.4
6.31_345.1465m/z	[4-(4-chlorophenyl)piperazin-1-yl]-(5,6,7,8-tetrahydroimidazo[1,2-a]pyridin-2-yl)methanone	C18H21ClN4O	6.31398	-3.29401	345.147	pos	M+H									196265	5619.49	445256	94270.9
5.16_344.2535m/z	Leu Val Leu	C17H33N3O4	5.1575	-2.49802	344.254	pos	M+H	11515702	FPPCCQGECVKLDY-IHRRRGAJSA-N	CC(C)C[C@@H](C(=O)N[C@@H](C(C)C)C(=O)N[C@@H](CC(C)C)C(=O)O)N	-1.6		Organic acids and derivatives	Carboxylic acids and derivatives	Amino acids, peptides, and analogues	194361	295784	320676	16452.9
8.00_317.0648m/z	Isorhamnetin	C16H12O7	8.00352	-2.45512	317.065	pos	M+H	5281654	IZQSVPBOUDKVDZ-UHFFFAOYSA-N	COC1=C(C=CC(=C1)C2=C(C(=O)C3=C(C=C(C=C3O2)O)O)O)O	1.9	C10084	Phenylpropanoids and polyketides	Flavonoids	Flavones	193627	485383	27166.2	16399.1
4.74_263.1385m/z	Phe Pro	C14H18N2O3	4.73788	-2.14883	263.138	pos	M+H	7020642	WEQJQNWXCSUVMA-RYUDHWBXSA-N	C1C[C@H](N(C1)C(=O)[C@H](CC2=CC=CC=C2)N)C(=O)O	-1.4		Organic acids and derivatives	Carboxylic acids and derivatives	Amino acids, peptides, and analogues	187448	343640	223851	54641.1
0.82_112.0506m/z	Cytosine	C4H5N3O	0.821567	0.87657	112.051	pos	M+H	597	OPTASPLRGRRNAP-UHFFFAOYSA-N	C1=C(NC(=O)N=C1)N	-1.7	C00380	Organoheterocyclic compounds	Diazines	Pyrimidines and pyrimidine derivatives	186574	519334	413791	52118.9
5.76_242.1745m/z	1,2,4-Trideoxy-3-C-methyl-4-{[(2E,4E)-2-methyl-2,4-hexadienoyl]amino}pentitol	C13H23NO3	5.75683	-2.2095	242.175	pos	M+H									180938	133241	173304	170503
0.84_146.0921m/z	4-Guanidinobutanoic acid	C5H11N3O2	0.840283	-2.31742	146.092	pos	M+H	500	TUHVEAJXIMEOSA-UHFFFAOYSA-N	C(CC(=O)O)CN=C(N)N	-1.5		Organic acids and derivatives	Carboxylic acids and derivatives	Amino acids, peptides, and analogues	180759	220027	165879	937193
4.32_295.1646m/z	Tyr Leu	C15H22N2O4	4.3232	-2.02224	295.165	pos	M+H	4466134	AUEJLPRZGVVDNU-UHFFFAOYSA-N	CC(C)CC(C(=O)O)NC(=O)C(CC1=CC=C(C=C1)O)N	-1.8		Organic acids and derivatives	Carboxylic acids and derivatives	Amino acids, peptides, and analogues	178065	428777	357003	21206.9
6.44_243.1230m/z	4-Oxododecanedioic acid	C12H20O5	6.43565	-3.17996	243.123	neg	M-H	13213508	HHXMOTDTSDYYEI-UHFFFAOYSA-N	C(CCCC(=O)CCC(=O)O)CCCC(=O)O	1.1		Organic acids and derivatives	Keto acids and derivatives	Medium-chain keto acids and derivatives	177623	213693	251490	351520
5.10_190.0495m/z	Kynurenic acid	C10H7NO3	5.09542	-1.93646	190.05	pos	M+H	3845	HCZHHEIFKROPDY-UHFFFAOYSA-N	C1=CC=C2C(=C1)C(=O)C=C(N2)C(=O)O	1.3	C01717	Organoheterocyclic compounds	Quinolines and derivatives	Quinoline carboxylic acids	175928	116124	160065	63791.9
0.84_99.0443m/z	Tulipalin A	C5H6O2	0.840283	2.51506	99.0443	pos	M+H	68352	GSLDEZOOOSBFGP-UHFFFAOYSA-N	C=C1CCOC1=O	0.8	C20578	Organoheterocyclic compounds	Lactones	Gamma butyrolactones	174638	415016	123447	355979
5.50_433.1130m/z	Hemiphloin	C21H22O10	5.49628	-2.4104	433.113	neg	M-H	160711	QKPKGDDHOGIEOO-JVVVWQBKSA-N	C1[C@H](OC2=C(C1=O)C(=C(C(=C2)O)[C@H]3[C@@H]([C@H]([C@@H]([C@H](O3)CO)O)O)O)O)C4=CC=C(C=C4)O	-0.1		Phenylpropanoids and polyketides	Flavonoids	Flavonoid glycosides	173613	931136	2575.31	95301.7
0.82_360.1491m/z	-Gentiobiose	C12H22O11	0.821567	-2.78675	360.149	pos	M+NH4	441422	DLRVVLDZNNYCBX-LIZSDCNHSA-N	C([C@@H]1[C@H]([C@@H]([C@H]([C@@H](O1)OC[C@@H]2[C@H]([C@@H]([C@H]([C@@H](O2)O)O)O)O)O)O)O)O	-4.7	C08240	Organic oxygen compounds	Organooxygen compounds	Carbohydrates and carbohydrate conjugates	172686	211331	146239	433487
8.71_302.3046m/z	Sphinganine	C18H39NO2	8.70905	-2.35934	302.305	pos	M+H	91486	OTKJDMGTUTTYMP-ZWKOTPCHSA-N	CCCCCCCCCCCCCCC[C@H]([C@H](CO)N)O	5.8	C00836	Organic nitrogen compounds	Organonitrogen compounds	Amines	170993	281650	269974	307285
4.23_261.1438m/z	gamma-Glutamylleucine	C11H20N2O5	4.2333	-2.54579	261.144	pos	M+H	151023	MYFMARDICOWMQP-YUMQZZPRSA-N	CC(C)C[C@@H](C(=O)O)NC(=O)CC[C@@H](C(=O)O)N	-2.4		Organic acids and derivatives	Carboxylic acids and derivatives	Amino acids, peptides, and analogues	170978	81332.3	80943.8	1.00023e+06
10.04_468.3074m/z	PC(14:0/0:0)	C22H46NO7P	10.0355	-2.31023	468.307	pos	M+H	24779456	JXGLGTFMAQOJBB-HEDKFQSOSA-N	CCCC/C=C\CCCCCCCC(=O)OC[C@H](COP(=O)([O-])OCC[N+](C)(C)C)O	3.5		Lipids and lipid-like molecules	Glycerophospholipids	Glycerophosphocholines	168607	91543.7	62470.4	151256
7.49_317.0649m/z	3-O-Methylquercetin	C16H12O7	7.48722	-2.24022	317.065	pos	M+H	5280681	WEPBGSIAWZTEJR-UHFFFAOYSA-N	COC1=C(OC2=CC(=CC(=C2C1=O)O)O)C3=CC(=C(C=C3)O)O	2.5	C04443	Phenylpropanoids and polyketides	Flavonoids	O-methylated flavonoids	164211	693874	87400.7	10913.5
8.55_257.0814m/z	2',4',6'-Trihydroxydihydrochalcone	C15H14O4	8.55238	-2.17529	257.081	neg	M-H	1226045	QWQGMMRHTWIOGH-UHFFFAOYSA-N	C1=CC=C(C=C1)CCC(=O)C2=C(C=C(C=C2O)O)O	3	C09618	Phenylpropanoids and polyketides	Linear 1,3-diarylpropanoids	Chalcones and dihydrochalcones	163742	339996	97914	45803
8.37_221.1895m/z	Caryophyllene epoxide	C15H24O	8.3666	-2.23875	221.189	pos	M+H	14350	NVEQFIOZRFFVFW-UHFFFAOYSA-N	CC1(CC2C1CCC3(C(O3)CCC2=C)C)C	3.6	C16908	Lipids and lipid-like molecules	Prenol lipids	Sesquiterpenoids	163594	171976	199342	38378.2
4.70_337.1017m/z	N-[4-(dimethylsulfamoyl)phenyl]-2-(4-fluorophenyl)acetamide	C16H17FN2O3S	4.6955	0.00232897	337.102	pos	M+H									157666	39947.2	23993.4	653052
7.32_492.2431m/z	N-cyclohexyl-4-[4-(1,2-dihydroacenaphthylen-3-ylsulfonyl)piperazin-1-yl]-6-methylpyrimidin-2-amine	C27H33N5O2S	7.32263	0.693174	492.243	pos	M+H									157635	7837.37	348069	33885.2
4.41_332.2172m/z	Val Thr Leu	C15H29N3O5	4.41345	-2.37852	332.217	pos	M+H	101986938	LCHZBEUVGAVMKS-RHYQMDGZSA-N	C[C@H]([C@@H](C(=O)N[C@@H](CC(C)C)C(=O)O)NC(=O)[C@H](C(C)C)N)O	-2		Organic acids and derivatives	Carboxylic acids and derivatives	Amino acids, peptides, and analogues	157204	310639	289308	8687.42
5.40_378.2378m/z	Val Leu Phe	C20H31N3O4	5.4035	-2.39486	378.238	pos	M+H	101750924	ZZGPVSZDZQRJQY-ULQDDVLXSA-N	CC(C)C[C@@H](C(=O)N[C@@H](CC1=CC=CC=C1)C(=O)O)NC(=O)[C@H](C(C)C)N	-1.3		Organic acids and derivatives	Carboxylic acids and derivatives	Amino acids, peptides, and analogues	156651	86657.8	311217	2424.25
2.36_122.0964m/z	Phenethylamine	C8H11N	2.36202	-0.248526	122.096	pos	M+H					C05332				153293	83151.8	78549.9	19929.4
4.74_149.0595m/z	(E)-Cinnamic acid	C9H8O2	4.73788	-1.69515	149.059	pos	M+H	444539	WBYWAXJHAXSJNI-VOTSOKGWSA-N	C1=CC=C(C=C1)/C=C/C(=O)O	2.1	C10438	Phenylpropanoids and polyketides	Cinnamic acids and derivatives	Cinnamic acids	151159	303586	215973	374043
9.23_328.2299m/z	Altrenogest	C21H26O2	9.23203	8.94887	328.23	pos	M+NH4									150981	278701	130804	337968
6.22_99.0807m/z	2-Hexenal	C6H10O	6.21638	2.54059	99.0807	pos	M+H					C08497				149787	205197	134220	263341
1.69_260.1599m/z	Gln Ile	C11H21N3O4	1.69367	-2.35077	260.16	pos	M+H	7020102	CNPNWGHRMBQHBZ-ZKWXMUAHSA-N	CC[C@H](C)[C@@H](C(=O)N[C@@H](CCC(=O)N)C(=O)O)N	-4.2		Organic acids and derivatives	Carboxylic acids and derivatives	Amino acids, peptides, and analogues	148155	513544	292550	11230
0.84_160.0965m/z	Acetyl-Valine	C7H13NO3	0.840283	-2.05566	160.096	pos	M+H									147532	165854	125249	127965
5.95_161.0594m/z	6-Methylcoumarin	C10H8O2	5.94685	-1.96934	161.059	pos	M+H	7092	FXFYOPQLGGEACP-UHFFFAOYSA-N	CC1=CC2=C(C=C1)OC(=O)C=C2	1.8		Phenylpropanoids and polyketides	Coumarins and derivatives		144761	172654	84892.7	329712
4.46_318.2016m/z	Ser Val Leu	C14H27N3O5	4.45763	-2.31123	318.202	pos	M+H	145457935	YEDSOSIKVUMIJE-DCAQKATOSA-N	CC(C)C[C@@H](C(=O)O)NC(=O)[C@H](C(C)C)NC(=O)[C@H](CO)N	-2.3		Organic acids and derivatives	Carboxylic acids and derivatives	Amino acids, peptides, and analogues	144736	330904	217666	18297.9
10.61_311.2207m/z	9-Oxo-12,13-Epoxy-10-Octadecenoic acid	C18H30O4	10.6101	-3.17293	311.221	pos	M+H	5283007	RCMABBHQYMBYKV-BUHFOSPRSA-N	CCCCCC1C(O1)/C=C/C(=O)CCCCCCCC(=O)O	4		Lipids and lipid-like molecules	Fatty Acyls	Fatty acids and conjugates	143847	302614	136402	197492
9.87_233.1103m/z	N-Cyclohexyl-2-benzothiazol-amine	C13H16N2S	9.86887	-1.76127	233.11	pos	M+H	591790	UPWPIFMHSFSVLE-UHFFFAOYSA-N	C1CCC(CC1)NC2=NC3=CC=CC=C3S2	4.4		Organoheterocyclic compounds	Benzothiazoles		143147	516473	115574	307249
6.92_339.1228m/z	alpha-guaiaconic acid	C20H20O5	6.92015	-2.89214	339.123	neg	M-H	165795	OIXPKFRMEUTHOG-UHFFFAOYSA-N	CC1=C(OC(=C1C)C2=CC(=C(C=C2)O)OC)C3=CC(=C(C=C3)O)OC	4.3		Organoheterocyclic compounds	Furans	Diphenylfurans	137547	93959.8	35371	1.10794e+06
5.39_369.1173m/z	3-O-Feruloylquinic acid	C17H20O9	5.3928	-1.94776	369.117	pos	M+H	9799386	RAGZUCNPTLULOL-KJJWLSQTSA-N	COC1=C(C=CC(=C1)/C=C/C(=O)O[C@@H]2C[C@@](C[C@H]([C@H]2O)O)(C(=O)O)O)O	-0.1	C02572	Organic oxygen compounds	Organooxygen compounds	Alcohols and polyols	131095	158721	20492.3	139714
1.34_267.0725m/z	Inosine	C10H12N4O5	1.34272	-3.79398	267.072	neg	M-H	135398641	UGQMRVRMYYASKQ-KQYNXXCUSA-N	C1=NC2=C(C(=O)N1)N=CN2[C@H]3[C@@H]([C@@H]([C@H](O3)CO)O)O	-1.3	C00294	Nucleosides, nucleotides, and analogues	Purine nucleosides		126656	100888	112700	116576
5.89_289.1540m/z	Indole-3-acetyl-L-leucine	C16H20N2O3	5.8911	-2.4074	289.154	pos	M+H	3945661	HCZNPUHZYPPINM-UHFFFAOYSA-N	CC(C)CC(C(=O)O)NC(=O)CC1=CNC2=CC=CC=C21	2.5		Organic acids and derivatives	Carboxylic acids and derivatives	Amino acids, peptides, and analogues	125943	107697	214992	50201.1
11.16_452.2772m/z	PE(16:0/0:0)	C21H44NO7P	11.1572	-2.42875	452.277	neg	M-H	9547069	YVYMBNSKXOXSKW-HXUWFJFHSA-N	CCCCCCCCCCCCCCCC(=O)OC[C@H](COP(=O)(O)OCCN)O	2.4		Lipids and lipid-like molecules	Glycerophospholipids	Glycerophosphoethanolamines	122623	78508.5	91745.8	108142
0.89_348.0695m/z	3'-AMP	C10H14N5O7P	0.89425	-2.50979	348.069	pos	M+H	41211	LNQVTSROQXJCDD-KQYNXXCUSA-N	C1=NC(=C2C(=N1)N(C=N2)[C@H]3[C@@H]([C@@H]([C@H](O3)CO)OP(=O)(O)O)O)N	-2.7	C01367	Nucleosides, nucleotides, and analogues	Ribonucleoside 3'-phosphates		120867	130443	13737.2	500048
8.57_309.2064m/z	9S-Hydroperoxy-10E,12Z,15Z-octadecatrienoic acid	C18H30O4	8.57472	-2.47921	309.206	neg	M-H	6450029	RWKJTIHNYSIIHW-MEBVTJQTSA-N	CC/C=C\C/C=C\C=C\[C@H](CCCCCCCC(=O)O)OO	4.7		Lipids and lipid-like molecules	Fatty Acyls	Lineolic acids and derivatives	118802	193515	459658	23049.1
5.53_177.0553m/z	Coniferaldehyde	C10H10O3	5.52565	-2.53857	177.055	neg	M-H	5280536	DKZBBWMURDFHNE-NSCUHMNNSA-N	COC1=C(C=CC(=C1)/C=C/C=O)O	1.5	C02666	Benzenoids	Phenols	Methoxyphenols	117027	411781	99744.9	387371
5.76_301.0336m/z	Isodemethylwedelolactone	C15H8O7	5.75683	-2.21423	301.034	pos	M+H	5318547	OBEHELRBTWMPHI-UHFFFAOYSA-N	C1=C(C=C(C2=C1C3=C(C4=CC(=C(C=C4O3)O)O)C(=O)O2)O)O	2.1		Phenylpropanoids and polyketides	Isoflavonoids	Coumestans	116024	295729	107130	81259
8.85_201.1634m/z	Alpha-Calacorene	C15H20	8.84733	-1.94323	201.163	pos	M+H	12302243	CUUMXRBKJIDIAY-ZDUSSCGKSA-N	CC1=CC[C@H](C2=C1C=CC(=C2)C)C(C)C	4.4		Lipids and lipid-like molecules	Prenol lipids	Sesquiterpenoids	112525	152656	217705	36845.5
5.56_434.1206n	Naringenin 5-O-beta-D-glucopyranoside	C21H22O10	5.55783	-1.50029	435.128	pos	M+H-H2O, M+H	3083618	MFQIWHVVFBCURA-KYSZGLPYSA-N	C1[C@@H](OC2=C(C1=O)C(=CC(=C2)O)O[C@H]3[C@@H]([C@H]([C@@H]([C@H](O3)CO)O)O)O)C4=CC=C(C=C4)O	0		Phenylpropanoids and polyketides	Flavonoids	Flavonoid glycosides	112473	632631	0	39996.4
0.91_383.1183m/z	Quinic acid	C7H12O6	0.91045	-3.07894	383.118	neg	2M-H	6508	AAWZDTNXLSGCEK-LNVDRNJUSA-N	C1[C@H](C([C@@H](CC1(C(=O)O)O)O)O)O	-2.4	C00296	Organic oxygen compounds	Organooxygen compounds	Alcohols and polyols	111946	204043	35673.3	222948
8.80_218.9616m/z	2,4-Dichlorophenoxyacetic acid	C8H6Cl2O3	8.80318	-2.51552	218.962	neg	M-H	1486	OVSKIKFHRZPJSS-UHFFFAOYSA-N	C1=CC(=C(C=C1Cl)Cl)OCC(=O)O	2.8	C03664	Benzenoids	Benzene and substituted derivatives	Phenoxyacetic acid derivatives	109611	355574	45287.1	19562.2
4.40_345.2125m/z	Val Asn Ile	C15H28N4O5	4.40257	-2.21376	345.212	pos	M+H	145458953	VHRLUTIMTDOVCG-PEDHHIEDSA-N	CC[C@H](C)[C@@H](C(=O)N[C@@H]([C@@H](C)CC)C(=O)O)NC(=O)[C@H](C(C)C)N	-2.1		Organic acids and derivatives	Carboxylic acids and derivatives	Amino acids, peptides, and analogues	109179	273067	212026	10379.1
6.55_168.1016m/z	p-Synephrine	C9H13NO2	6.54805	-2.03726	168.102	pos	M+H	7172	YRCWQPVGYLYSOX-UHFFFAOYSA-N	CNCC(C1=CC=C(C=C1)O)O	-0.6	C01869	Benzenoids	Phenols	1-hydroxy-2-unsubstituted benzenoids	107987	124160	126774	99179.3
6.39_424.1271m/z	1-(4-oxo-4h-chromen-3-yl)-2,3,4,9-tetrahydro-1h-beta-carboline-3-carboxylic acid	C21H16N2O4	6.39213	0.994421	424.127	pos	M+ACN+Na									107504	399408	19495	2337.82
11.53_219.1739m/z	Muurolladie-3-One	C15H22O	11.5287	-2.1023	219.174	pos	M+H	3989419	LMILVXQXGKTFSZ-UHFFFAOYSA-N	CC1=CCC(C2C1CC(=O)C(=C2)C)C(C)C	3.2		Lipids and lipid-like molecules	Prenol lipids	Sesquiterpenoids	107368	56544.5	55324.9	939485
5.46_133.0646m/z	cinnamaldehyde	C9H8O	5.45875	-1.45893	133.065	pos	M+H	637511	KJPRLNWUNMBNBZ-QPJJXVBHSA-N	C1=CC=C(C=C1)/C=C/C=O	1.9	C00903	Phenylpropanoids and polyketides	Cinnamaldehydes		106257	158115	75751.5	245010
4.78_330.2379m/z	Leu Val Val	C16H31N3O4	4.78375	-2.51762	330.238	pos	M+H	11559237	FTKXYXACXYOHND-XUXIUFHCSA-N	CC[C@H](C)[C@@H](C(=O)N[C@@H](CC(C)C)C(=O)O)NC(=O)[C@H](C(C)C)N	0		Organic acids and derivatives	Carboxylic acids and derivatives	Amino acids, peptides, and analogues	102375	188895	201834	13296
4.94_359.2279m/z	Ile Asn Ile	C16H30N4O5	4.9398	-2.7189	359.228	pos	M+H	145457149	KIEPQOIQHFKQLK-PCBIJLKTSA-N	CC[C@H](C)[C@@H](C(=O)O)NC(=O)[C@H](CC(=O)N)NC(=O)[C@H](CC1=CC=CC=C1)N	-2.9		Organic acids and derivatives	Carboxylic acids and derivatives	Amino acids, peptides, and analogues	101101	212409	145095	8094.01
11.22_315.1932m/z	7-oxodehydroabietic acid	C20H26O3	11.2223	-7.23012	315.193	pos	M+H	29212	MSWJSDLNPCSSNW-MISYRCLQSA-N	CC(C)C1=CC2=C(C=C1)[C@]3(CCC[C@@]([C@@H]3CC2=O)(C)C(=O)O)C	4.5		Lipids and lipid-like molecules	Prenol lipids	Diterpenoids	100203	89493.8	117446	72470.1
10.95_313.2376m/z	9,10-Dihydroxy-12Z-octadecenoic acid	C18H34O4	10.9524	-2.53894	313.238	neg	M-H	9966640	XEBKSQSGNGRGDW-YFHOEESVSA-N	CCCCC/C=C\CC(C(CCCCCCCC(=O)O)O)O	4.6		Lipids and lipid-like molecules	Fatty Acyls	Fatty acids and conjugates	99198.1	186683	90085.7	26059.7
5.71_303.1331m/z	(5R)-trans-1,7-diphenyl-5-hydroxy-6-hepten-3-one	C19H20O2	5.71025	-8.57766	303.133	pos	M+Na	13347321	NEQGOKAKPXXESR-ACCUITESSA-N	C1=CC=C(C=C1)CCC(=O)CC(/C=C/C2=CC=CC=C2)O	3.3		Phenylpropanoids and polyketides	Diarylheptanoids	Linear diarylheptanoids	98470.7	44393.6	126794	45677.8
3.60_312.1295m/z	N2,N2-Dimethylguanosine	C12H17N5O5	3.60143	-2.51607	312.129	pos	M+H	135501639	RSPURTUNRHNVGF-IOSLPCCCSA-N	CN(C)C1=NC2=C(C(=O)N1)N=CN2[C@H]3[C@@H]([C@@H]([C@H](O3)CO)O)O	-1.3		Nucleosides, nucleotides, and analogues	Purine nucleosides		98403.3	325558	259227	17463.6
0.81_90.0553m/z	Alanine	C3H7NO2	0.8108	3.88351	90.0553	pos	M+H	602	QNAYBMKLOCPYGJ-UHFFFAOYSA-N	CC(C(=O)O)N	-3	C01401	Organic acids and derivatives	Carboxylic acids and derivatives	Amino acids, peptides, and analogues	93552.3	58362.8	111824	119136
10.60_451.2832m/z	Celastrol	C29H38O4	10.5979	-2.32685	451.283	pos	M+H	122724	KQJSQWZMSAGSHN-JJWQIEBTSA-N	CC1=C(C(=O)C=C2C1=CC=C3[C@]2(CC[C@@]4([C@@]3(CC[C@@]5([C@H]4C[C@](CC5)(C)C(=O)O)C)C)C)C)O	5.9		Lipids and lipid-like molecules	Prenol lipids	Triterpenoids	93498.8	19091.1	185606	11253.6
10.61_482.3234m/z	PC(15:0/0:0)	C23H48NO7P	10.6101	-1.56104	482.323	pos	M+H	24779458	RJZVWDTYEWCUAR-JOCHJYFZSA-N	CCCCCCCCCCCCCCC(=O)OC[C@H](COP(=O)([O-])OCC[N+](C)(C)C)O	5		Lipids and lipid-like molecules	Glycerophospholipids	Glycerophosphocholines	93371.8	50320.4	33100.4	128875
5.18_325.0911m/z	Skimmin	C15H16O8	5.17893	-1.99345	325.091	pos	M+H	99693	VPAOSFFTKWUGAD-TVKJYDDYSA-N	C1=CC(=CC2=C1C=CC(=O)O2)O[C@H]3[C@@H]([C@H]([C@@H]([C@H](O3)CO)O)O)O	-0.7		Phenylpropanoids and polyketides	Coumarins and derivatives	Coumarin glycosides	93220	110551	103010	10270.7
4.87_346.1964m/z	Asp Val Leu	C15H27N3O6	4.87192	-2.39953	346.196	pos	M+H	145454616	GIKOVDMXBAFXDF-NHCYSSNCSA-N	CC(C)C[C@@H](C(=O)O)NC(=O)[C@H](C(C)C)NC(=O)[C@H](CC(=O)O)N	-3.8		Organic acids and derivatives	Carboxylic acids and derivatives	Amino acids, peptides, and analogues	93114	215530	126375	10752.6
5.22_225.0763m/z	Ethyl syringate	C11H14O5	5.21757	-2.35332	225.076	neg	M-H	19845	WKUVKFZZCHINKG-UHFFFAOYSA-N	CCOC(=O)C1=CC(=C(C(=C1)OC)O)OC	1.7		Benzenoids	Benzene and substituted derivatives	Benzoic acids and derivatives	92895.5	144148	93899.1	213817
2.93_295.1646m/z	Ile Tyr	C15H22N2O4	2.93335	-2.26329	295.165	pos	M+H	7408195	MUFXDFWAJSPHIQ-XDTLVQLUSA-N	CC[C@H](C)[C@@H](C(=O)N[C@@H](CC1=CC=C(C=C1)O)C(=O)O)N	-2.2		Organic acids and derivatives	Carboxylic acids and derivatives	Amino acids, peptides, and analogues	92450.8	293800	194622	4361
7.50_315.0503m/z	6-Methoxyluteolin	C16H12O7	7.49582	-2.19427	315.05	neg	M-H	5317284	FHHSEFRSDKWJKJ-UHFFFAOYSA-N	COC1=C(C2=C(C=C1O)OC(=CC2=O)C3=CC(=C(C=C3)O)O)O	1.4		Phenylpropanoids and polyketides	Flavonoids	O-methylated flavonoids	92428.6	388344	46259.9	80378.2
6.82_311.1271m/z	15,16-Dihydrotanshinone I	C18H14O3	6.81825	-2.54853	311.127	pos	M+CH3OH+H	11425923	HARGZZNYNSYSGJ-JTQLQIEISA-N	C[C@H]1COC2=C1C(=O)C(=O)C3=C2C=CC4=C(C=CC=C43)C	3.2		Lipids and lipid-like molecules	Prenol lipids	Diterpenoids	91304.3	116757	3746.95	91816.4
7.17_327.1220m/z	7-Acetoxy-2-methylisoflavone	C18H14O4	7.17002	-2.53229	327.122	pos	M+CH3OH+H									90915.8	19274	1790.99	810939
7.83_303.1595m/z	2,6-dihydroxy-7-methoxy-1,1,4a-trimethyl-3,4,10,10a-tetrahydro-2H-phenanthren-9-one	C18H24O4	7.83223	-2.40858	303.159	neg	M-H									90740.6	168164	62782.5	16218.8
10.53_249.1480m/z	Atractylenolide III	C15H20O3	10.525	-1.96416	249.148	pos	M+H	155948	FBMORZZOJSDNRQ-GLQYFDAESA-N	CC1=C2C[C@H]3C(=C)CCC[C@@]3(C[C@@]2(OC1=O)O)C	2.1	C17887	Lipids and lipid-like molecules	Prenol lipids	Terpene lactones	89495.8	59359.7	164522	55223.9
0.86_323.0277m/z	Uridine 5'-monophosphate	C9H13N2O9P	0.861783	-2.8557	323.028	neg	M-H	6030	DJJCXFVJDGTHFX-XVFCMESISA-N	C1=CN(C(=O)NC1=O)[C@H]2[C@@H]([C@@H]([C@H](O2)COP(=O)(O)O)O)O	-3.6	C00105	Nucleosides, nucleotides, and analogues	Pyrimidine nucleotides	Pyrimidine ribonucleotides	88809.9	44857.8	29382	339956
2.63_223.1073m/z	Gly Phe	C11H14N2O3	2.62638	-2.08951	223.107	pos	M+H	6992304	GLUBLISJVJFHQS-VIFPVBQESA-N	C1=CC=C(C=C1)C[C@@H](C(=O)NCC(=O)O)N	-2.5		Organic acids and derivatives	Carboxylic acids and derivatives	Amino acids, peptides, and analogues	85320.5	211296	112395	10985.5
5.17_244.0878n	biotin	C10H16N2O3S	5.16785	-1.49061	245.095	pos	M+H-H2O, M+H	171548	YBJHBAHKTGYVGT-ZKWXMUAHSA-N	C1[C@H]2[C@@H]([C@@H](S1)CCCCC(=O)O)NC(=O)N2	0.3	C00120	Organoheterocyclic compounds	Biotin and derivatives		84967.6	58887.5	69964.2	16753.3
7.35_359.0765m/z	Jaceidin	C18H16O8	7.3489	-2.0693	359.076	neg	M-H	5464461	XUWTZJRCCPNNJR-UHFFFAOYSA-N	COC1=C(C=CC(=C1)C2=C(C(=O)C3=C(O2)C=C(C(=C3O)OC)O)OC)O	2.8		Phenylpropanoids and polyketides	Flavonoids	O-methylated flavonoids	84881.7	249324	43549.4	44811.9
3.18_149.0240m/z	3-Hydroxymandelic acid	C8H8O4	3.18133	-2.53531	149.024	neg	M-H2O-H	86957	OLSDAJRAVOVKLG-UHFFFAOYSA-N	C1=CC(=CC(=C1)O)C(C(=O)O)O	-0.1	C11527	Benzenoids	Phenols	1-hydroxy-4-unsubstituted benzenoids	81580.2	69958.2	124946	42288.2
5.45_275.1383m/z	IAA-Val	C15H18N2O3	5.44825	-2.58177	275.138	pos	M+H	446641	AZEGJHGXTSUPPG-AWEZNQCLSA-N	CC(C)[C@@H](C(=O)O)NC(=O)CC1=CNC2=CC=CC=C21	2.1		Organic acids and derivatives	Carboxylic acids and derivatives	Amino acids, peptides, and analogues	79749.6	72905.5	145481	27669.3
7.55_213.1127m/z	2,2'-(3-Methylcyclohexane-1,1-diyl)diacetic acid	C11H18O4	7.54962	-2.54241	213.113	neg	M-H	220370	HJPDHTDUPWGUHP-UHFFFAOYSA-N	CC1CCCC(C1)(CC(=O)O)CC(=O)O	2.1		Organic acids and derivatives	Carboxylic acids and derivatives	Dicarboxylic acids and derivatives	79734	110187	127309	64184.1
7.99_315.0504m/z	Rhamnetin	C16H12O7	7.99383	-1.89989	315.05	neg	M-H	5281691	JGUZGNYPMHHYRK-UHFFFAOYSA-N	COC1=CC(=C2C(=C1)OC(=C(C2=O)O)C3=CC(=C(C=C3)O)O)O	1.9	C10176	Phenylpropanoids and polyketides	Flavonoids	Flavones	77230.2	225050	20609.3	8562.58
6.09_191.0699m/z	6-Methoxy-4-methylcoumarin	C11H10O3	6.09282	-2.09148	191.07	pos	M+H	223821	KNGPIBWCWOQBEK-UHFFFAOYSA-N	CC1=CC(=O)OC2=C1C=C(C=C2)OC	2.2		Phenylpropanoids and polyketides	Coumarins and derivatives		76125.4	140741	29089.5	224465
7.91_331.0804m/z	3,7-Di-O-methylquercetin	C17H14O7	7.90968	-2.40999	331.08	pos	M+H	5280417	LUJAXSNNYBCFEE-UHFFFAOYSA-N	COC1=CC(=C2C(=C1)OC(=C(C2=O)OC)C3=CC(=C(C=C3)O)O)O	2.8	C01265	Phenylpropanoids and polyketides	Flavonoids	O-methylated flavonoids	76032.2	40230.8	17239.6	908305
8.67_211.1324m/z	Jasmonic acid	C12H18O3	8.67458	-2.04791	211.132	pos	M+H	5281166	ZNJFBWYDHIGLCU-HWKXXFMVSA-N	CC/C=C\C[C@@H]1[C@H](CCC1=O)CC(=O)O	1.6	C08491	Lipids and lipid-like molecules	Fatty Acyls	Lineolic acids and derivatives	75397.6	255453	114889	102211
4.34_359.2279m/z	Gln Val Leu	C16H30N4O5	4.34452	-2.64717	359.228	pos	M+H	145455275	VEYGCDYMOXHJLS-GVXVVHGQSA-N	CC(C)C[C@@H](C(=O)O)NC(=O)[C@H](C(C)C)NC(=O)[C@H](CCC(=O)N)N	-4.1		Organic acids and derivatives	Carboxylic acids and derivatives	Amino acids, peptides, and analogues	73401.1	108239	124683	11153.6
4.26_326.0993n	Melilotoside	C15H18O8	4.26128	-2.55402	325.092	neg	M-H, M+Cl	5280759	GVRIYIMNJGULCZ-ZMKUSUEASA-N	C1=CC=C(C(=C1)/C=C/C(=O)O)O[C@H]2[C@@H]([C@H]([C@@H]([C@H](O2)CO)O)O)O	-0.4		Organic oxygen compounds	Organooxygen compounds	Carbohydrates and carbohydrate conjugates	73079.5	37107.6	455063	50662.7
10.80_359.1116m/z	Gardenin B	C19H18O7	10.8045	-2.72598	359.112	pos	M+H	96539	LXEVSYZNYDZSOB-UHFFFAOYSA-N	COC1=CC=C(C=C1)C2=CC(=O)C3=C(C(=C(C(=C3O2)OC)OC)OC)O	3.3	C15109	Phenylpropanoids and polyketides	Flavonoids	O-methylated flavonoids	72714.5	75900.1	40038.4	70321.1
5.05_410.1912m/z	Tyr Asp Ile	C19H27N3O7	5.05055	-2.3766	410.191	pos	M+H	145454476	RTXQQDVBACBSCW-CFMVVWHZSA-N	CC[C@H](C)[C@@H](C(=O)N[C@@H](CC1=CC=C(C=C1)O)C(=O)O)NC(=O)[C@H](CC(=O)O)N	-2.9		Organic acids and derivatives	Carboxylic acids and derivatives	Amino acids, peptides, and analogues	71714.6	103697	148825	0
4.38_222.0764m/z	Acetyl-Tyrosine	C11H13NO4	4.37607	-3.4315	222.076	neg	M-H	68310	CAHKINHBCWCHCF-JTQLQIEISA-N	CC(=O)N[C@@H](CC1=CC=C(C=C1)O)C(=O)O	-0.2		Organic acids and derivatives	Carboxylic acids and derivatives	Amino acids, peptides, and analogues	70618.6	51124.6	52724.3	26901.3
1.92_298.1138m/z	3'-O-Methylguanosine	C11H15N5O5	1.92273	-2.67994	298.114	pos	M+H	135742509	UYARPHAXAJAZLU-KQYNXXCUSA-N	CO[C@@H]1[C@H](O[C@H]([C@@H]1O)N2C=NC3=C2N=C(NC3=O)N)CO	-1.9		Nucleosides, nucleotides, and analogues	Purine nucleosides		70526.9	261181	210936	34692.9
7.37_207.0648m/z	Scoparone	C11H10O4	7.36903	-2.0089	207.065	pos	M+H	8417	GUAFOGOEJLSQBT-UHFFFAOYSA-N	COC1=C(C=C2C(=C1)C=CC(=O)O2)OC	1.9	C09311	Phenylpropanoids and polyketides	Coumarins and derivatives		69966.6	224183	68352.5	175712
10.08_170.0727n	2-Hyroxybiphenyl	C12H10O	10.0821	-2.9801	171.08	pos	M+H, M+ACN+H, M+H-H2O					C02499				66963.3	29888.5	8513.43	243822
6.43_323.1382m/z	Indole-3-acetyl-L-phenylalanine	C19H18N2O3	6.42505	-2.58382	323.138	pos	M+H	644227	BUGQHORRADGONS-KRWDZBQOSA-N	C1=CC=C(C=C1)C[C@@H](C(=O)O)NC(=O)CC2=CNC3=CC=CC=C32	2		Organic acids and derivatives	Carboxylic acids and derivatives	Amino acids, peptides, and analogues	66043	128734	126720	8281.19
9.80_299.1998m/z	14-Deoxyandrographolide	C20H30O4	9.79925	-2.21486	299.2	pos	M+H-2H2O	11624161	GVRNTWSGBWPJGS-YSDSKTICSA-N	C[C@@]12CC[C@H]([C@@]([C@H]1CCC(=C)[C@H]2CCC3=CCOC3=O)(C)CO)O	3.4		Lipids and lipid-like molecules	Prenol lipids	Terpene lactones	64887.7	29626	59016.1	28208.2
1.03_188.0560m/z	N-Acetyl-L-glutamic acid	C7H11NO5	1.02993	-2.54333	188.056	neg	M-H	70914	RFMMMVDNIPUKGG-YFKPBYRVSA-N	CC(=O)N[C@@H](CCC(=O)O)C(=O)O	-1.8	C00624	Organic acids and derivatives	Carboxylic acids and derivatives	Amino acids, peptides, and analogues	64880.6	30742.9	27818	67392
15.03_218.0154m/z	Arecoline hydrobromide	C8H14BrNO2	15.0281	-9.03877	218.015	pos	M+H-H2O									64868.9	74982.6	49114.8	110522
6.14_247.1071m/z	N-Acetyl-tryptophan	C13H14N2O3	6.13697	-2.39291	247.107	pos	M+H	700653	DZTHIGRZJZPRDV-LBPRGKRZSA-N	CC(=O)N[C@@H](CC1=CNC2=CC=CC=C21)C(=O)O	1.1	C03137	Organic acids and derivatives	Carboxylic acids and derivatives	Amino acids, peptides, and analogues	63314.7	34482.8	29609.8	16639
8.13_333.2063m/z	5(S)-HpEPE	C20H30O4	8.13115	-2.5685	333.206	neg	M-H	5283184	NKXYOIJDQPQELO-GHWNLOBHSA-N	CC/C=C\C/C=C\C/C=C\C/C=C\C=C\[C@H](CCCC(=O)O)OO	4.6		Lipids and lipid-like molecules	Fatty Acyls	Eicosanoids	59978.5	14.6836	109477	2323.92
5.19_243.1333m/z	Glutamylleucine	C11H20N2O5	5.19045	-2.37703	243.133	pos	M+H-H2O	9856500	YBAFDPFAUTYYRW-YUMQZZPRSA-N	CC(C)C[C@@H](C(=O)O)NC(=O)[C@H](CCC(=O)O)N	-3.3		Organic acids and derivatives	Carboxylic acids and derivatives	Amino acids, peptides, and analogues	58968.8	151571	158594	16045.7
4.67_225.0864m/z	Hydroxykynurenine	C10H12N2O4	4.6731	-2.47593	225.086	pos	M+H	89	VCKPUUFAIGNJHC-UHFFFAOYSA-N	C1=CC(=C(C(=C1)O)N)C(=O)CC(C(=O)O)N	-2.5	C02794	Organic oxygen compounds	Organooxygen compounds	Carbonyl compounds	58774.1	36656.9	81175	11677.3
3.55_294.1209n	Glu Phe	C14H18N2O5	3.55045	-2.26396	295.128	pos	M+H-H2O, M+H	19365626	XMBSYZWANAQXEV-UHFFFAOYSA-N	C1=CC=C(C=C1)CC(C(=O)O)NC(=O)C(CCC(=O)O)N	-3	C01425	Organic acids and derivatives	Carboxylic acids and derivatives	Amino acids, peptides, and analogues	57019.6	260464	115210	4534.25
11.49_198.1041n	o-Methylbenzhydrol	C14H14O	11.4919	-2.07245	181.101	pos	M+H-H2O, M+H	95659	MXHXXJOHFRHBFB-UHFFFAOYSA-N	CC1=CC=CC=C1C(C2=CC=CC=C2)O	3.1		Benzenoids	Benzene and substituted derivatives	Diphenylmethanes	56565.1	53611.7	13781.9	181567
6.75_353.1827n	4-(butan-2-yl)phenyl 2-(acetylamino)-2-deoxy-beta-D-glucopyranoside	C18H27NO6	6.75292	-3.1243	354.19	pos	M+H-H2O, M+H	16398230	NZLBBWKRFWAHOK-NTCFCCFRSA-N	CCC(C)C1=CC=C(C=C1)O[C@H]2[C@@H]([C@H]([C@@H]([C@H](O2)CO)O)O)NC(=O)C	1.8		Organic oxygen compounds	Organooxygen compounds	Carbohydrates and carbohydrate conjugates	56307.7	110105	210838	17017.6
4.70_401.1069m/z	4-(4-chlorophenoxy)-N-[5-methyl-4-(4-methylphenyl)-1,3-thiazol-2-yl]butanamide	C21H21ClN2O2S	4.6955	-4.00735	401.107	pos	M+H									54257.9	19211.8	1214.88	461752
1.89_207.1125m/z	(S)-alpha-Amino-beta-phenylpropionicacid	C9H11NO2	1.89043	-1.71084	207.113	pos	M+ACN+H					C00079				54144.6	53976.4	47563.8	9268.85
8.26_423.1289m/z	Campestrinoside	C20H24O10	8.25885	-1.79317	423.129	neg	M-H									53558.6	76936.4	93272.3	14545.9
0.77_118.0507m/z	Threonine	C4H9NO3	0.765683	-2.41894	118.051	neg	M-H	6288	AYFVYJQAPQTCCC-GBXIJSLDSA-N	C[C@H]([C@@H](C(=O)O)N)O	-2.9	C00188	Organic acids and derivatives	Carboxylic acids and derivatives	Amino acids, peptides, and analogues	50896.1	26427.4	44049.2	49089.2
7.55_345.0606m/z	5,7,3',4'-Tetrahydroxy-6,8-dimethoxyflavone	C17H14O8	7.54962	-2.86808	345.061	neg	M-H	5321859	GLMWHQIFJIURES-UHFFFAOYSA-N	COC1=C(C(=C2C(=C1O)C(=O)C=C(O2)C3=CC(=C(C=C3)O)O)OC)O	2.3	C04581	Phenylpropanoids and polyketides	Flavonoids	O-methylated flavonoids	49135	147942	27872.8	0
8.18_175.0396m/z	4-Methylumbelliferone	C10H8O3	8.18495	-2.50269	175.04	neg	M-H	5280567	HSHNITRMYYLLCV-UHFFFAOYSA-N	CC1=CC(=O)OC2=C1C=CC(=C2)O	1.9	C03081	Phenylpropanoids and polyketides	Coumarins and derivatives	Hydroxycoumarins	49114.2	126938	17026.9	127107
6.49_357.1336m/z	Pinoresinol	C20H22O6	6.48685	-2.23956	357.134	neg	M-H	73399	HGXBRUKMWQGOIE-AFHBHXEDSA-N	COC1=C(C=CC(=C1)[C@@H]2[C@H]3CO[C@@H]([C@H]3CO2)C4=CC(=C(C=C4)O)OC)O	2.3	C05366	Lignans, neolignans and related compounds	Furanoid lignans		48665.9	51385.2	0	242506
4.78_148.9522m/z	Trifluoromethanesulfonic acid	CHF3O3S	4.78298	-2.68289	148.952	neg	M-H									48585.5	618.247	130649	710.115
5.53_360.2119m/z	Asp Ile Ile	C16H29N3O6	5.5345	-2.68238	360.212	pos	M+H	145454467	NHSDEZURHWEZPN-SXTJYALSSA-N	CC[C@H](C)[C@@H](C(=O)N[C@@H]([C@@H](C)CC)C(=O)O)NC(=O)[C@H](CC(=O)O)N	-3.3		Organic acids and derivatives	Carboxylic acids and derivatives	Amino acids, peptides, and analogues	48255.7	153403	59756.4	7509.54
0.90_187.0720m/z	NAlpha-Acetyl-L-glutamine	C7H12N2O4	0.899833	-2.51338	187.072	neg	M-H	182230	KSMRODHGGIIXDV-YFKPBYRVSA-N	CC(=O)N[C@@H](CCC(=O)N)C(=O)O	-1.4		Organic acids and derivatives	Carboxylic acids and derivatives	Amino acids, peptides, and analogues	48097.2	10896.2	32652.5	178580
1.07_211.0595m/z	7,8-Dihydroxycoumarin	C9H6O4	1.07498	-3.28826	211.06	pos	M+CH3OH+H	5280569	ATEFPOUAMCWAQS-UHFFFAOYSA-N	C1=CC(=C(C2=C1C=CC(=O)O2)O)O	1.2	C03093	Phenylpropanoids and polyketides	Coumarins and derivatives	Hydroxycoumarins	47397.8	91501.6	41852.1	48730.8
3.74_282.1190m/z	N6-Methyladenosine	C11H15N5O4	3.73987	-2.30331	282.119	pos	M+H	102175	VQAYFKKCNSOZKM-IOSLPCCCSA-N	CNC1=C2C(=NC=N1)N(C=N2)[C@H]3[C@@H]([C@@H]([C@H](O3)CO)O)O	-0.4		Nucleosides, nucleotides, and analogues	Purine nucleosides		47000.9	178553	23363.6	0
12.78_169.0140m/z	Gallic acid	C7H6O5	12.776	-1.45982	169.014	neg	M-H	370	LNTHITQWFMADLM-UHFFFAOYSA-N	C1=C(C=C(C(=C1O)O)O)C(=O)O	0.7	C01424	Benzenoids	Benzene and substituted derivatives	Benzoic acids and derivatives	44965.2	64732.7	33361.6	48512.9
4.59_341.1376m/z	Clemaphenol A	C20H22O6	4.59303	-2.12413	341.138	pos	M+H-H2O	46173999	VRHZMFGDDGFRLP-AFHBHXEDSA-N	COC1=C(C=C(C=C1)[C@@H]2[C@H]3CO[C@@H]([C@H]3CO2)C4=CC(=C(C=C4)OC)O)O	2.3	C17808	Lignans, neolignans and related compounds	Furanoid lignans		43908.8	18566.7	60878.2	0
5.60_401.1081m/z	Gentiopicroside	C16H20O9	5.59642	-2.32703	401.108	neg	M+FA-H	88708	DUAGQYUORDTXOR-GPQRQXLASA-N	C=C[C@H]1[C@@H](OC=C2C1=CCOC2=O)O[C@H]3[C@@H]([C@H]([C@@H]([C@H](O3)CO)O)O)O	-1.2	C09782	Organic oxygen compounds	Organooxygen compounds	Carbohydrates and carbohydrate conjugates	43864.8	0	1445.65	841190
1.54_293.0540m/z	1-Methylpseudouridine	C10H14N2O6	1.5421	-2.32785	293.054	neg	M+Cl	99543	UVBYMVOUBXYSFV-XUTVFYLZSA-N	CN1C=C(C(=O)NC1=O)[C@H]2[C@@H]([C@@H]([C@H](O2)CO)O)O	-2.6		Nucleosides, nucleotides, and analogues	Nucleoside and nucleotide analogues		43529.9	91382	138160	33438.1
7.01_195.1012m/z	Methoxyeugenol	C11H14O3	7.01192	-1.69032	195.101	pos	M+H	226486	FWMPKHMKIJDEMJ-UHFFFAOYSA-N	COC1=CC(=CC(=C1O)OC)CC=C	2.6		Benzenoids	Phenols	Methoxyphenols	43442.3	30448.5	42099	71332.1
8.31_261.1115m/z	7-O-Prenylscopoletin	C15H16O4	8.30978	-2.28276	261.112	pos	M+H	1764914	ZLPLFUBVEZVYDX-UHFFFAOYSA-N	CC(=CCOC1=C(C=C2C=CC(=O)OC2=C1)OC)C	3.4		Phenylpropanoids and polyketides	Coumarins and derivatives		43144.5	17781.2	10754.2	802341
6.59_245.1379m/z	9-(2,3-Dihydroxypropoxy)-9-oxononanoic acid	C12H22O6	6.59313	-1.74935	245.138	pos	M+H-H2O	45783154	BQRISQXLSXCXSC-UHFFFAOYSA-N	C(CCCC(=O)O)CCCC(=O)OCC(CO)O	0.8		Lipids and lipid-like molecules	Fatty Acyls	Fatty acids and conjugates	42923	75974.6	102460	36701.8
4.17_374.2277m/z	Ile Leu Glu	C17H31N3O6	4.16655	-2.26851	374.228	pos	M+H	145456189	HUORUFRRJHELPD-MNXVOIDGSA-N	CC[C@H](C)[C@@H](C(=O)N[C@@H](CC(C)C)C(=O)N[C@@H](CCC(=O)O)C(=O)O)N	-1.7		Organic acids and derivatives	Carboxylic acids and derivatives	Amino acids, peptides, and analogues	42348.4	123695	8596.05	0
8.08_177.0542m/z	ferulic acid	C10H10O4	8.07818	-1.91609	177.054	pos	M+H-H2O	445858	KSEBMYQBYZTDHS-HWKANZROSA-N	COC1=C(C=CC(=C1)/C=C/C(=O)O)O	1.5	C01494	Phenylpropanoids and polyketides	Cinnamic acids and derivatives	Hydroxycinnamic acids and derivatives	41793.8	47568.1	12009.6	138779
9.34_287.1385m/z	(2-methoxyphenyl)-[2-(5-methyl-1,2-oxazol-3-yl)pyrrolidin-1-yl]methanone	C16H18N2O3	9.33643	-1.76233	287.139	pos	M+H									41439	19097	45194	0
4.74_429.1327m/z	Morroniside	C17H26O11	4.73788	-9.89381	429.133	pos	M+Na	11228693	YTZSBJLNMIQROD-SFBCHFHNSA-N	C[C@H]1[C@@H]2[C@H](C[C@@H](O1)O)C(=CO[C@H]2O[C@H]3[C@@H]([C@H]([C@@H]([C@H](O3)CO)O)O)O)C(=O)OC	-1.8	C17000	Organic oxygen compounds	Organooxygen compounds	Carbohydrates and carbohydrate conjugates	41002.2	112506	100242	172335
7.01_138.0193m/z	2-Nitrophenol	C6H5NO3	7.00763	-2.38461	138.019	neg	M-H	6947	IQUPABOKLQSFBK-UHFFFAOYSA-N	C1=CC=C(C(=C1)[N+](=O)[O-])O	1.8	C01988	Benzenoids	Phenols	Nitrophenols	40204.3	53565.2	78196.5	77773.4
0.72_147.0528n	L-glutamic acid	C5H9NO4	0.717533	-2.32084	146.046	neg	M-H, M+K-2H	33032	WHUUTDBJXJRKMK-VKHMYHEASA-N	C(CC(=O)O)[C@@H](C(=O)O)N	-3.7	C00025	Organic acids and derivatives	Carboxylic acids and derivatives	Amino acids, peptides, and analogues	39777.4	30715.9	14667.1	117920
3.97_280.1053n	Asp Phe	C13H16N2O5	3.96703	-2.28402	281.113	pos	M+H, M+Na									39050.4	165391	69170.9	8560.63
7.79_247.1334m/z	Pechueloic Acid	C15H20O3	7.79167	-2.40411	247.133	neg	M-H	24094149	ZFHSKBJBODQVBX-AXTRIDKLSA-N	C[C@H]1CC[C@H](CC2=C(C(=O)C[C@@H]12)C)C(=C)C(=O)O	2.4		Lipids and lipid-like molecules	Prenol lipids	Sesquiterpenoids	38612.1	20744.5	24399.9	162579
7.92_137.1322m/z	beta-Myrcene	C10H16	7.92032	-2.11185	137.132	pos	M+H	31253	UAHWPYUMFXYFJY-UHFFFAOYSA-N	CC(=CCCC(=C)C=C)C	4.3	C06074	Lipids and lipid-like molecules	Prenol lipids	Monoterpenoids	38521.4	21131.3	50243.1	31753.3
10.77_277.2163m/z	13-Hydroxy-9Z,11E-octadecadienoic acid	C18H32O3	10.7738	-3.32933	277.216	neg	M-H2O-H	5282947	HNICUWMFWZBIFP-BSZOFBHHSA-N	CCCCCC(/C=C/C=C\CCCCCCCC(=O)O)O	5.3	C04056	Lipids and lipid-like molecules	Fatty Acyls	Lineolic acids and derivatives	38240.5	25297.5	55170.3	12198.1
9.10_387.2269m/z	MDL 72832 HCL	C22H30N2O4	9.10157	-2.29669	387.227	pos	M+H									37460.6	35975.9	34112.7	443406
4.47_160.1329m/z	DL-2-Aminooctanoic acid	C8H17NO2	4.46777	-1.66601	160.133	pos	M+H	69522	AKVBCGQVQXPRLD-UHFFFAOYSA-N	CCCCCCC(C(=O)O)N	-0.5		Organic acids and derivatives	Carboxylic acids and derivatives	Amino acids, peptides, and analogues	37191.8	24281.1	14731.2	6290.38
8.48_369.1324m/z	Isopsoralidin	C20H16O5	8.48395	-2.51488	369.132	pos	M+CH3OH+H	12304285	JWCDJOWFOVBBCP-UHFFFAOYSA-N	CC1(CCC2=CC3=C(C=C2O1)OC(=O)C4=C3OC5=C4C=CC(=C5)O)C	4.1		Phenylpropanoids and polyketides	Isoflavonoids	Coumestans	36724.6	44051.2	4138.14	418765
4.53_293.1139m/z	Glutamylphenylalanine	C14H18N2O5	4.52912	-1.50468	293.114	neg	M-H	111299	XHHOHZPNYFQJKL-QWRGUYRKSA-N	C1=CC=C(C=C1)C[C@@H](C(=O)O)NC(=O)CC[C@@H](C(=O)O)N	-3		Organic acids and derivatives	Carboxylic acids and derivatives	Amino acids, peptides, and analogues	36625.2	40794.8	49833.7	273983
5.81_397.1487m/z	[3-[2-(4-fluoroanilino)pyrimidin-4-yl]piperidin-1-yl]-(5-methylthiophen-2-yl)methanone	C21H21FN4OS	5.81235	-1.48132	397.149	pos	M+H									35891.5	13420	23196.5	123028
11.77_365.2677m/z	16,16-dimethyl-PGE1	C22H38O5	11.7668	-2.37795	365.268	pos	M+H-H2O	5283058	RQOFITYRYPQNLL-ZWSAOQBFSA-N	CCCCC(C)(C)[C@@H](/C=C/[C@H]1[C@@H](CC(=O)[C@@H]1CCCCCCC(=O)O)O)O	4		Lipids and lipid-like molecules	Fatty Acyls	Eicosanoids	34964.5	123305	68389.1	15799.3
5.77_165.0543m/z	4-Hydroxycinnamic acid	C9H8O3	5.76893	-1.96814	165.054	pos	M+H	637542	NGSWKAQJJWESNS-ZZXKWVIFSA-N	C1=CC(=CC=C1/C=C/C(=O)O)O	1.5	C00811	Phenylpropanoids and polyketides	Cinnamic acids and derivatives	Hydroxycinnamic acids and derivatives	34626.7	57521.9	35325.4	100991
11.60_365.2678m/z	1a,1b-dihomo PGF2Alpha	C22H38O5	11.6036	-2.24441	365.268	pos	M+H-H2O	6443812	ZCTAOAWRUXSOQF-GWSKAPOCSA-N	CCCCC[C@@H](/C=C/[C@H]1[C@@H](C[C@@H]([C@@H]1C/C=C\CCCCCC(=O)O)O)O)O	3.8		Lipids and lipid-like molecules	Fatty Acyls	Eicosanoids	34277.2	150389	73505.1	25884.3
6.38_306.1362m/z	Brevicarine	C17H21N3	6.37967	-1.89249	306.136	pos	M+K	5490034	OMGIBPZQATWNBX-UHFFFAOYSA-N	CC1=NC=C(C2=C1NC3=CC=CC=C32)CCCCNC	3.3		Alkaloids and derivatives	Harmala alkaloids		33913.7	7738.68	2.26382	345717
4.27_346.2329m/z	Ile Leu Thr	C16H31N3O5	4.26653	-2.23864	346.233	pos	M+H	145456197	PHRWFSFCNJPWRO-PPCPHDFISA-N	CC[C@H](C)[C@@H](C(=O)N[C@@H](CC(C)C)C(=O)N[C@@H]([C@@H](C)O)C(=O)O)N	-2.1		Organic acids and derivatives	Carboxylic acids and derivatives	Amino acids, peptides, and analogues	33135.9	101035	145434	0
3.94_314.2068m/z	Pro Val Val	C15H27N3O4	3.94425	-2.07209	314.207	pos	M+H	15199694	FHJQROWZEJFZPO-SRVKXCTJSA-N	CC(C)[C@@H](C(=O)N[C@@H](C(C)C)C(=O)O)NC(=O)[C@@H]1CCCN1	-2.2		Organic acids and derivatives	Carboxylic acids and derivatives	Amino acids, peptides, and analogues	32383	72614.1	5361.88	0
10.39_263.2363m/z	Farnesyl acetone	C18H30O	10.3907	-2.33539	263.236	pos	M+H	1711945	LTUMRKDLVGQMJU-IUBLYSDUSA-N	CC(=CCC/C(=C/CC/C(=C/CCC(=O)C)/C)/C)C	5.6		Lipids and lipid-like molecules	Prenol lipids	Diterpenoids	28245	16820.2	22804.5	35725.3
10.10_247.1334m/z	5,9-dihydroxy-5,7,7-trimethyl-4,5a,6,8,8a,9-hexahydro-1H-azuleno[5,6-c]furan-3-one	C15H22O4	10.0972	-1.9485	247.133	neg	M-H2O-H	156145	MWDNWQAVYQDZQI-UHFFFAOYSA-N	CC1(CC2C(C1)C(CC3=C(C2O)C(OC3=O)O)(C)O)C	0.2		Lipids and lipid-like molecules	Prenol lipids	Terpene lactones	27534.3	35957.8	9043.05	107336
1.79_201.1240m/z	Alanylisoleucine	C9H18N2O3	1.78603	-2.51522	201.124	neg	M-H									27451.7	91056.6	84058.4	1048.76
9.67_193.0492m/z	scopoletin	C10H8O4	9.66895	-1.72739	193.049	pos	M+H	5280460	RODXRVNMMDRFIK-UHFFFAOYSA-N	COC1=C(C=C2C(=C1)C=CC(=O)O2)O	1.5	C01752	Phenylpropanoids and polyketides	Coumarins and derivatives	Hydroxycoumarins	26844.4	14550	11553.3	13290.4
3.73_318.2016m/z	Ser Leu Val	C14H27N3O5	3.72937	-2.29113	318.202	pos	M+H	101769071	IXZHZUGGKLRHJD-DCAQKATOSA-N	CC(C)C[C@@H](C(=O)N[C@@H](C(C)C)C(=O)O)NC(=O)[C@H](CO)N	-2.3		Organic acids and derivatives	Carboxylic acids and derivatives	Amino acids, peptides, and analogues	26638	33904.5	83476.3	0
6.37_160.0400m/z	2-Indolecarboxylic acid	C9H7NO2	6.3669	-2.73444	160.04	neg	M-H	72899	HCUARRIEZVDMPT-UHFFFAOYSA-N	C1=CC=C2C(=C1)C=C(N2)C(=O)O	2.3		Organoheterocyclic compounds	Indoles and derivatives	Indolecarboxylic acids and derivatives	26081.8	95522.1	68760.2	78526.2
8.93_255.1584m/z	Gliocladic acid	C14H22O4	8.92902	-2.56588	255.158	pos	M+H	6439616	SLVSUVFUFJKMCV-MZGZCWAVSA-N	CC(C)[C@@H]1CCC(=C[C@H]1/C=C(\CO)/C(=O)O)CO	1.1		Lipids and lipid-like molecules	Prenol lipids	Monoterpenoids	25887.7	44196.4	36971.5	13666.9
11.38_296.2577m/z	linolenic acid	C18H30O2	11.3811	-2.47055	296.258	pos	M+NH4	5280934	DTOSIQBPPRVQHS-PDBXOOCHSA-N	CC/C=C\C/C=C\C/C=C\CCCCCCCC(=O)O	5.9	C01595	Lipids and lipid-like molecules	Fatty Acyls	Lineolic acids and derivatives	25332.2	68468.4	26189.2	55688.1
14.79_192.1378m/z	N-Ethyl-N-Methylcathinone	C12H17NO	14.7949	-2.41443	192.138	pos	M+H	43794825	LOQPFJRCXJZNQV-UHFFFAOYSA-N	CCN(C)C(C)C(=O)C1=CC=CC=C1	2.4		Organic oxygen compounds	Organooxygen compounds	Carbonyl compounds	24269.7	37023.8	20781.3	43689.1
9.59_177.0543m/z	Monoethyl phthalate	C10H10O4	9.5857	-1.74231	177.054	pos	M+H-H2O	75318	YWWHKOHZGJFMIE-UHFFFAOYSA-N	CCOC(=O)C1=CC=CC=C1C(=O)O	1.8		Benzenoids	Benzene and substituted derivatives	Benzoic acids and derivatives	24225.9	30433.9	14545.3	58027.6
14.87_175.1186m/z	L-Arginine	C6H14N4O2	14.8731	-1.82563	175.119	pos	M+H	6322	ODKSFYDXXFIFQN-BYPYZUCNSA-N	C(C[C@@H](C(=O)O)N)CN=C(N)N	-4.2	C00062	Organic acids and derivatives	Carboxylic acids and derivatives	Amino acids, peptides, and analogues	24204	31644	18202.6	36763.2
5.67_433.1126m/z	Vitexin	C21H20O10	5.66643	-0.732791	433.113	pos	M+H	5280441	SGEWCQFRYRRZDC-VPRICQMDSA-N	C1=CC(=CC=C1C2=CC(=O)C3=C(O2)C(=C(C=C3O)O)[C@H]4[C@@H]([C@H]([C@@H]([C@H](O4)CO)O)O)O)O	0.2	C01460	Phenylpropanoids and polyketides	Flavonoids	Flavonoid glycosides	22861.8	8483.89	17418	324905
5.36_206.0808m/z	Indolelactic acid	C11H11NO3	5.35922	-1.70684	206.081	pos	M+H	92904	XGILAAMKEQUXLS-UHFFFAOYSA-N	C1=CC=C2C(=C1)C(=CN2)CC(C(=O)O)O	1.5		Organoheterocyclic compounds	Indoles and derivatives	Indolyl carboxylic acids and derivatives	22406.3	22792.6	10073.5	156028
10.08_158.0729n	1-Naphthylmethanol	C11H10O	10.0821	-1.9841	141.07	pos	M+H-H2O, M+H									20978.1	10166.9	6079.37	70488.7
5.19_565.1554m/z	Corymboside	C26H28O14	5.19045	0.300749	565.155	pos	M+H	13644660	OVMFOVNOXASTPA-UHFFFAOYSA-N	C1C(C(C(C(O1)C2=C(C(=C3C(=C2O)C(=O)C=C(O3)C4=CC=C(C=C4)O)C5C(C(C(C(O5)CO)O)O)O)O)O)O)O	-2.2		Phenylpropanoids and polyketides	Flavonoids	Flavonoid glycosides	20858.8	0	42317	365976
7.53_269.0812m/z	2',5'-Dihydroxy-4-methoxychalcone	C16H14O4	7.52822	-2.64447	269.081	neg	M-H									18366.1	473.538	1327.13	153084
5.29_447.0922m/z	Isoorientin	C21H20O11	5.28958	-2.32403	447.092	neg	M-H	114776	ODBRNZZJSYPIDI-VJXVFPJBSA-N	C1=CC(=C(C=C1C2=CC(=O)C3=C(O2)C=C(C(=C3O)[C@H]4[C@@H]([C@H]([C@@H]([C@H](O4)CO)O)O)O)O)O)O	-0.2	C01821	Phenylpropanoids and polyketides	Flavonoids	Flavonoid glycosides	17660.9	18174.5	19670.7	722507
13.41_271.2271m/z	2-hydroxyhexadecanoic acid	C16H32O3	13.4103	-2.77141	271.227	neg	M-H	92836	JGHSBPIZNUXPLA-UHFFFAOYSA-N	CCCCCCCCCCCCCCC(C(=O)O)O	6.4		Lipids and lipid-like molecules	Fatty Acyls	Fatty acids and conjugates	16996.4	61150.7	14889.3	49139.5
0.71_132.0299m/z	L-aspartic acid	C4H7NO4	0.706783	-2.2517	132.03	neg	M-H	5960	CKLJMWTZIZZHCS-REOHCLBHSA-N	C([C@@H](C(=O)O)N)C(=O)O	-2.8	C00049	Organic acids and derivatives	Carboxylic acids and derivatives	Amino acids, peptides, and analogues	15720.5	42544.1	8779.04	43970.8
12.48_205.1947m/z	gamma-Cadinene	C15H24	12.4766	-2.08135	205.195	pos	M+H	92313	WRHGORWNJGOVQY-RBSFLKMASA-N	CC1=C[C@H]2[C@H](CC1)C(=C)CC[C@@H]2C(C)C	4.3	C19738	Lipids and lipid-like molecules	Prenol lipids	Sesquiterpenoids	12695.2	13665.3	18406	2821.23
7.89_329.0659m/z	3,6-Dimethoxyapigenin	C17H14O7	7.88715	-2.33255	329.066	neg	M-H									11838	5529.51	2139.61	183617
7.99_339.1218m/z	Coniferyl ferulate	C20H20O6	7.99103	-2.56014	339.122	pos	M+H-H2O					C17855				8927.43	9077.69	0	71193.9
4.13_382.1712m/z	Trans-Zeatin-o-glucoside	C16H23N5O6	4.1318	-2.51039	382.171	pos	M+H	5461146	UUPDCCPAOMDMPT-HNVSNYHQSA-N	C/C(=C\CNC1=NC=NC2=C1NC=N2)/CO[C@H]3[C@@H]([C@H]([C@@H]([C@H](O3)CO)O)O)O	-0.9	C03423	Lipids and lipid-like molecules	Fatty Acyls	Fatty acyl glycosides	8346.08	7332.51	43024.8	95749
14.78_311.1256m/z	Cl-Amidine	C14H19ClN4O2	14.7823	-4.40048	311.126	pos	M+H					C06060				8082.34	20853.2	8857.19	16233.9
7.86_353.1373m/z	Corylin	C20H16O4	7.86372	-3.1972	353.137	pos	M+CH3OH+H	5316097	PWAACAMQKVIVPZ-UHFFFAOYSA-N	CC1(C=CC2=C(O1)C=CC(=C2)C3=COC4=C(C3=O)C=CC(=C4)O)C	3.7		Phenylpropanoids and polyketides	Isoflavonoids	Pyranoisoflavonoids	7657.84	16035	937.002	179641
16.64_99.0449m/z	Tiglic acid	C5H8O2	16.6389	-2.16172	99.0449	neg	M-H	125468	UIERETOOQGIECD-ONEGZZNKSA-N	C/C=C(\C)/C(=O)O	1	C08279	Lipids and lipid-like molecules	Fatty Acyls	Fatty acids and conjugates	5446.84	6815.19	4017.85	5892.97
6.35_147.0449m/z	3-Isochromanone	C9H8O2	6.35462	-2.03498	147.045	neg	M-H					C07728				5277.17	3831.04	1215.74	43343.5
4.66_182.0455m/z	4-Pyridoxic acid	C8H9NO4	4.65563	-2.28415	182.045	neg	M-H	6723	HXACOUQIXZGNBF-UHFFFAOYSA-N	CC1=NC=C(C(=C1O)C(=O)O)CO	0.1	C00847	Organoheterocyclic compounds	Pyridines and derivatives	Pyridinecarboxylic acids and derivatives	3669.53	18980.3	38824.5	9368.03
6.82_593.1854m/z	Acaciin	C28H32O14	6.81825	-1.88757	593.185	pos	M+H	5317025	YFVGIJBUXMQFOF-PJOVQGMDSA-N	C[C@H]1[C@@H]([C@H]([C@H]([C@@H](O1)OC[C@@H]2[C@H]([C@@H]([C@H]([C@@H](O2)OC3=CC(=C4C(=C3)OC(=CC4=O)C5=CC=C(C=C5)OC)O)O)O)O)O)O)O	-0.5		Phenylpropanoids and polyketides	Flavonoids	Flavonoid glycosides	489.837	1643.82	0	3.23468e+06
5.65_431.0972m/z	Saponaretin	C21H20O10	5.64888	-2.63019	431.097	neg	M-H					C01714				0	0	0	228091
5.35_463.1227m/z	Swertiajaponin	C22H22O11	5.34753	-1.63817	463.123	pos	M+H	442659	DLVLXOYLQKCAME-DGHBBABESA-N	COC1=C(C(=C2C(=C1)OC(=CC2=O)C3=CC(=C(C=C3)O)O)O)[C@H]4[C@@H]([C@H]([C@@H]([C@H](O4)CO)O)O)O	0.2	C10187	Phenylpropanoids and polyketides	Flavonoids	Flavonoid glycosides	0	0	0	168344
6.81_283.0604m/z	Glycitein	C16H12O5	6.81237	-2.69205	283.06	neg	M-H	5317750	DXYUAIFZCFRPTH-UHFFFAOYSA-N	COC1=C(C=C2C(=C1)C(=O)C(=CO2)C3=CC=C(C=C3)O)O	2.4	C14536	Phenylpropanoids and polyketides	Isoflavonoids	Isoflav-2-enes	0	0	0	123648
6.82_285.0750m/z	Genkwanin	C16H12O5	6.81825	-2.57415	285.075	pos	M+H	5281617	JPMYFOBNRRGFNO-UHFFFAOYSA-N	COC1=CC(=C2C(=C1)OC(=CC2=O)C3=CC=C(C=C3)O)O	2.1	C10046	Phenylpropanoids and polyketides	Flavonoids	O-methylated flavonoids	0	0	0	89805.1

## Sheet: Fig5 Root
ID	Metabolite	Formula	Retention time(min)	Mass Error (ppm)	m/z	Mode	Adducts	Pubchem_ID	InChiKeys	SMILES	xlogp	KEGG	classA	classB	classC	NXJG
0.79_377.0845m/z	Trehalose	C12H22O11	0.793683	-3.23365	377.085	neg	M+Cl	7427	HDTRYLNUVZCQOY-LIZSDCNHSA-N	C([C@@H]1[C@H]([C@@H]([C@H]([C@H](O1)O[C@@H]2[C@@H]([C@H]([C@@H]([C@H](O2)CO)O)O)O)O)O)O)O	-4.2	C01083	Organic oxygen compounds	Organooxygen compounds	Carbohydrates and carbohydrate conjugates	1.1016e+08
0.79_342.1151n	α，β-Trehalose	C12H22O11	0.789917	-3.30083	381.078	pos	M+K, 2M+K, M+Na	10871590	HDTRYLNUVZCQOY-BTLHAWITSA-N	C([C@@H]1[C@H]([C@@H]([C@H]([C@H](O1)O[C@H]2[C@@H]([C@H]([C@@H]([C@H](O2)CO)O)O)O)O)O)O)O	-4.2	C01083	Organic oxygen compounds	Organooxygen compounds	Carbohydrates and carbohydrate conjugates	4.98418e+07
0.83_863.2428m/z	Verbascose	C30H52O26	0.834033	-1.5685	863.243	neg	M+Cl					C08252				4.37951e+07
4.66_354.0942n	Cyclohexanecarboxylic acid	C16H18O9	4.66087	-2.61987	355.101	pos	M+H-H2O, M+H, M+K, M+Na, 2M+Na, M+NH4	7413	NZNMSOFKMUBTKW-UHFFFAOYSA-N	C1CCC(CC1)C(=O)O	1.9	C09822	Organic acids and derivatives	Carboxylic acids and derivatives	Carboxylic acids	3.21482e+07
0.79_539.1374m/z	Raffinose	C18H32O16	0.793683	-2.14831	539.137	neg	M+Cl	439242	MUPFEKGTMRGPLJ-ZQSKZDJDSA-N	C([C@@H]1[C@@H]([C@@H]([C@H]([C@H](O1)OC[C@@H]2[C@H]([C@@H]([C@H]([C@H](O2)O[C@]3([C@H]([C@@H]([C@H](O3)CO)O)O)CO)O)O)O)O)O)O)O	-5.8	C00492	Organic oxygen compounds	Organooxygen compounds	Carbohydrates and carbohydrate conjugates	3.05392e+07
1.20_118.0262n	Succinic acid	C4H6O4	1.2041	-3.74453	117.019	neg	M-H, M+Cl, M-H2O-H	1110	KDYFGRWQOYBRFD-UHFFFAOYSA-N	C(CC(=O)O)C(=O)O	-0.6	C00042	Organic acids and derivatives	Carboxylic acids and derivatives	Dicarboxylic acids and derivatives	2.38442e+07
3.04_153.1271m/z	(R)-Camphor	C10H16O	3.04152	-2.09831	153.127	pos	M+H	159055	DSSYKIVIOFKYAU-XCBNKYQSSA-N	C[C@@]12CC[C@@H](C1(C)C)CC2=O	2.2	C00808	Lipids and lipid-like molecules	Prenol lipids	Monoterpenoids	2.19658e+07
7.02_297.0760m/z	5-O-Methylbiochanin A	C17H14O5	7.01782	-2.69387	297.076	neg	M-H	14308334	JQQULYXWXRNRAX-UHFFFAOYSA-N	COC1=CC=C(C=C1)C2=COC3=C(C2=O)C(=CC(=C3)O)OC	2.8		Phenylpropanoids and polyketides	Isoflavonoids	O-methylated isoflavonoids	2.09342e+07
1.43_268.1033m/z	Adenosine	C10H13N5O4	1.43417	-2.91788	268.103	pos	M+H	60961	OIRDTQYFTABQOQ-KQYNXXCUSA-N	C1=NC(=C2C(=N1)N(C=N2)[C@H]3[C@@H]([C@@H]([C@H](O3)CO)O)O)N	-1.1	C00212	Nucleosides, nucleotides, and analogues	Purine nucleosides		1.98001e+07
8.06_330.2398n	9S,10S,11R-trihydroxy-12Z-octadecenoic acid	C18H34O5	8.0575	-2.41644	329.233	neg	M-H, 2M-H, M+Cl	16061050	JHGVFGJXFVIYSM-BSHMHQBXSA-N	CCCCC/C=C\[C@H]([C@H]([C@H](CCCCCCCC(=O)O)O)O)O	3.5		Lipids and lipid-like molecules	Fatty Acyls	Fatty acids and conjugates	1.59671e+07
4.66_162.0313n	4-Methylphthalic anhydride	C9H6O3	4.66087	-2.55444	163.039	pos	M+H-H2O, M+H	88069	ZOXBWJMCXHTKNU-UHFFFAOYSA-N	CC1=CC2=C(C=C1)C(=O)OC2=O	1.7		Organoheterocyclic compounds	Benzofurans	Benzofuranones	1.51498e+07
8.80_161.0240m/z	3 Hydroxycoumarin	C9H6O3	8.80318	-2.37124	161.024	neg	M-H	13650	MJKVTPMWOKAVMS-UHFFFAOYSA-N	C1=CC=C2C(=C1)C=C(C(=O)O2)O	1.8		Phenylpropanoids and polyketides	Coumarins and derivatives	Hydroxycoumarins	1.43463e+07
3.64_203.0820m/z	D-Tryptophan	C11H12N2O2	3.63682	-2.73271	203.082	neg	M-H	9060	QIVBCDIJIAJPQS-SECBINFHSA-N	C1=CC=C2C(=C1)C(=CN2)C[C@H](C(=O)O)N	-1.1	C00525	Organoheterocyclic compounds	Indoles and derivatives	Indolyl carboxylic acids and derivatives	1.29421e+07
6.17_516.1256n	3,4-Dicaffeoylquinic acid	C25H24O12	6.16993	-2.32534	515.118	neg	M-2H, M-H	5281780	UFCLZKMFXSILNL-PSEXTPKNSA-N	C1[C@H]([C@H]([C@@H](C[C@@]1(C(=O)O)O)OC(=O)/C=C/C2=CC(=C(C=C2)O)O)OC(=O)/C=C/C3=CC(=C(C=C3)O)O)O	1.5		Organic oxygen compounds	Organooxygen compounds	Alcohols and polyols	1.27113e+07
7.35_209.0298m/z	Mucicacid	C6H10O8	7.3489	-2.4988	209.03	neg	M-H	3037582	DSLZVSRJTYRBFB-DUHBMQHGSA-N	[C@@H]([C@@H]([C@H](C(=O)O)O)O)([C@@H](C(=O)O)O)O	-2.5	C00879	Organic oxygen compounds	Organooxygen compounds	Carbohydrates and carbohydrate conjugates	1.14877e+07
10.79_519.3315n	PC(18:2/0:0)	C26H50NO7P	10.7931	-1.86819	520.339	pos	M+H, M+K, M+Na	497299	IHNKQIMGVNPMTC-RUZDIDTESA-N	CCCCCCCCCCCCCCCCCC(=O)OC[C@H](COP(=O)([O-])OCC[N+](C)(C)C)O	6.6		Lipids and lipid-like molecules	Glycerophospholipids	Glycerophosphocholines	1.04536e+07
5.34_480.0892n	Gossypin	C21H20O13	5.33662	-2.42722	481.097	pos	M+H, M+Na					C10051				7.95721e+06
3.66_360.1047n	1-O-(3-Hydroxy-4,5-dimethoxybenzoyl)hexopyranose	C15H20O10	3.65662	-2.58236	359.097	neg	M-H, M+Cl									7.08055e+06
11.40_834.5282m/z	GPSer(22:6/18:0)	C46H78NO10P	11.4002	-0.967084	834.528	neg	M-H									6.10745e+06
6.48_187.0971m/z	Azelaic acid	C9H16O4	6.4755	-2.75232	187.097	neg	M-H	2266	BDJRBEYXGGNYIS-UHFFFAOYSA-N	C(CCCC(=O)O)CCCC(=O)O	1.6	C08261	Lipids and lipid-like molecules	Fatty Acyls	Fatty acids and conjugates	5.95678e+06
6.88_172.0730n	1,4-Cyclohexanedicarboxylic acid	C8H12O4	6.87993	-3.03508	171.066	neg	M-H, 2M-H	14106	PXGZQGDTEZPERC-UHFFFAOYSA-N	C1CC(CCC1C(=O)O)C(=O)O	0.5		Organic acids and derivatives	Carboxylic acids and derivatives	Dicarboxylic acids and derivatives	4.38486e+06
1.63_231.0140m/z	Maleic acid	C4H4O4	1.62638	-2.96133	231.014	neg	2M-H	444266	VZCYOOQTPOCHFL-UPHRSURJSA-N	C(=C\C(=O)O)\C(=O)O	-0.3	C01384	Organic acids and derivatives	Carboxylic acids and derivatives	Dicarboxylic acids and derivatives	4.2162e+06
1.23_191.0193m/z	Citrate	C6H8O7	1.2276	-2.38215	191.019	neg	M-H	31348	KRKNYBCHXYNGOX-UHFFFAOYSA-K	C(C(=O)[O-])C(CC(=O)[O-])(C(=O)[O-])O	0.2	C00158	Organic acids and derivatives	Carboxylic acids and derivatives	Tricarboxylic acids and derivatives	4.0153e+06
6.18_508.1207n	Syringetin-3-O-galactoside	C23H24O13	6.18157	-1.86264	509.128	pos	M+H, M+Na	20056941	JMFWYRWPJVEZPV-SFBSONLZSA-N	COC1=CC(=CC(=C1O)OC)C2=C(C(=O)C3=C(C=C(C=C3O2)O)O)OC4[C@@H]([C@H]([C@H]([C@H](O4)CO)O)O)O	0.7		Phenylpropanoids and polyketides	Flavonoids	Flavonoid glycosides	3.30613e+06
6.82_593.1854m/z	Acaciin	C28H32O14	6.81825	-1.88757	593.185	pos	M+H	5317025	YFVGIJBUXMQFOF-PJOVQGMDSA-N	C[C@H]1[C@@H]([C@H]([C@H]([C@@H](O1)OC[C@@H]2[C@H]([C@@H]([C@H]([C@@H](O2)OC3=CC(=C4C(=C3)OC(=CC4=O)C5=CC=C(C=C5)OC)O)O)O)O)O)O)O	-0.5		Phenylpropanoids and polyketides	Flavonoids	Flavonoid glycosides	3.23468e+06
1.90_165.0785n	D-phenylalanine	C9H11NO2	1.90188	-2.71996	164.071	neg	M-H, 2M-H	71567	COLNVLDHVKWLRT-MRVPVSSYSA-N	C1=CC=C(C=C1)C[C@H](C(=O)O)N	-1.5	C02265	Organic acids and derivatives	Carboxylic acids and derivatives	Amino acids, peptides, and analogues	3.19059e+06
0.88_226.9958m/z	D-threo-Isocitric acid	C6H8O7	0.880417	-3.11901	226.996	neg	M+Cl	5318532	ODBLHEXUDAPZAU-ZAFYKAAXSA-N	C([C@@H]([C@H](C(=O)O)O)C(=O)O)C(=O)O	-1.8	C00451	Organic acids and derivatives	Carboxylic acids and derivatives	Tricarboxylic acids and derivatives	2.9832e+06
6.60_313.0710m/z	Dipteryxin	C17H14O6	6.6025	-2.44908	313.071	neg	M-H	44257265	BSXFDHHTXOAUGB-UHFFFAOYSA-N	COC1=CC=C(C=C1)C2=COC3=C(C(=C(C=C3C2=O)OC)O)O	2.4		Phenylpropanoids and polyketides	Isoflavonoids	O-methylated isoflavonoids	2.95456e+06
4.76_403.1598m/z	Diethyloxalpropionate	C9H14O5	4.76215	-2.79586	403.16	neg	2M-H	97750	OQOCQBJWOCRPQY-UHFFFAOYSA-N	CCOC(=O)C(C)C(=O)C(=O)OCC	1.3	C04067	Organic acids and derivatives	Keto acids and derivatives	Beta-keto acids and derivatives	2.92379e+06
10.19_517.3158n	PC(18:3/0:0)	C26H48NO7P	10.1864	-1.99308	518.323	pos	M+H, M+Na	24779469	WKQNRCYKYCKESD-YVHLTTHBSA-N	CC/C=C\C/C=C\C/C=C\CCCCCCCC(=O)OC[C@H](COP(=O)([O-])OCC[N+](C)(C)C)O	4.3		Lipids and lipid-like molecules	Glycerophospholipids	Glycerophosphocholines	2.56269e+06
5.72_465.1018m/z	Spiraeoside	C21H20O12	5.72168	-2.04774	465.102	pos	M+H	5320844	OIUBYZLTFSLSBY-HMGRVEAOSA-N	C1=CC(=C(C=C1C2=C(C(=O)C3=C(C=C(C=C3O2)O)O)O)O)O[C@H]4[C@@H]([C@H]([C@@H]([C@H](O4)CO)O)O)O	0.4		Phenylpropanoids and polyketides	Flavonoids	Flavonoid glycosides	2.42453e+06
0.91_133.0139m/z	malate	C4H6O5	0.91045	-2.75594	133.014	neg	M-H	525	BJEPYKJPYRNKOW-UHFFFAOYSA-N	C(C(C(=O)O)O)C(=O)O	-1.3	C00711	Organic acids and derivatives	Hydroxy acids and derivatives	Beta hydroxy acids and derivatives	2.40439e+06
11.24_495.3314n	PC(16:0/0:0)	C24H50NO7P	11.2351	-2.13144	496.339	pos	M+H, M+Na	460602	ASWBNKHCZGQVJV-HSZRJFAPSA-N	CCCCCCCCCCCCCCCC(=O)OC[C@H](COP(=O)([O-])OCC[N+](C)(C)C)O	5.6		Lipids and lipid-like molecules	Glycerophospholipids	Glycerophosphocholines	2.34405e+06
1.03_86.0968m/z	Piperidine	C5H11N	1.03448	4.31138	86.0968	pos	M+H	8082	NQRYJNQNLNOLGT-UHFFFAOYSA-N	C1CCNCC1	0.8	C01746	Organoheterocyclic compounds	Piperidines		2.16173e+06
8.92_160.0521n	4-Methylcoumarin	C10H8O2	8.91708	-2.06434	193.086	pos	M+H, M+CH3OH+H	11833	PSGQCCSGKGJLRL-UHFFFAOYSA-N	CC1=CC(=O)OC2=CC=CC=C12	2.3		Phenylpropanoids and polyketides	Coumarins and derivatives		2.08661e+06
0.86_213.0167m/z	D-(-)-Gulono-gamma-lactone	C6H10O6	0.861783	-2.58163	213.017	neg	M+Cl									2.03733e+06
1.19_129.0425n	L-Pyroglutamic acid	C5H7NO3	1.19307	-0.717222	130.05	pos	M+H, M+ACN+H	7405	ODHCTXKNWHHXJC-VKHMYHEASA-N	C1CC(=O)N[C@@H]1C(=O)O	-0.8	C01879	Organic acids and derivatives	Carboxylic acids and derivatives	Amino acids, peptides, and analogues	1.97774e+06
0.81_133.0739n	N-Methylthreonine	C5H11NO3	0.8108	0.285119	116.071	pos	M+H-H2O, M+H	7010355	CCAIIPMIAFGKSI-DMTCNVIQSA-N	C[C@H]([C@@H](C(=O)O)NC)O	-3.1		Organic acids and derivatives	Carboxylic acids and derivatives	Amino acids, peptides, and analogues	1.87345e+06
6.07_516.1257n	Isochlorogenic acid A	C25H24O12	6.0677	-2.17	515.118	neg	M-2H, M-H	6474310	KRZBCHWVBQOTNZ-RDJMKVHDSA-N	C1C(C[C@H](C([C@@H]1OC(=O)/C=C/C2=CC(=C(C=C2)O)O)O)OC(=O)/C=C/C3=CC(=C(C=C3)O)O)(O)C(=O)O	1.5	C10468	Organic oxygen compounds	Organooxygen compounds	Alcohols and polyols	1.74365e+06
1.65_281.1489m/z	Val Tyr	C14H20N2O4	1.65085	-2.28433	281.149	pos	M+H	7009555	VEYJKJORLPYVLO-RYUDHWBXSA-N	CC(C)[C@@H](C(=O)N[C@@H](CC1=CC=C(C=C1)O)C(=O)O)N	-2.5		Organic acids and derivatives	Carboxylic acids and derivatives	Amino acids, peptides, and analogues	1.63986e+06
5.97_495.1122m/z	Laricitrin 3-galactoside	C22H22O13	5.97053	-2.22778	495.112	pos	M+H									1.63445e+06
5.09_177.0189m/z	Esculetin	C9H6O4	5.08508	-2.41614	177.019	neg	M-H	5281416	ILEDWLMCKZNDJK-UHFFFAOYSA-N	C1=CC(=O)OC2=CC(=C(C=C21)O)O	1.2	C09263	Phenylpropanoids and polyketides	Coumarins and derivatives	Hydroxycoumarins	1.62368e+06
5.91_206.0817m/z	N-acetylphenylalanine	C11H13NO3	5.90983	-2.57456	206.082	neg	M-H	74839	CBQJSKKFNMDLON-JTQLQIEISA-N	CC(=O)N[C@@H](CC1=CC=CC=C1)C(=O)O	0.6		Organic acids and derivatives	Carboxylic acids and derivatives	Amino acids, peptides, and analogues	1.61768e+06
6.40_196.1095n	Loliolide	C11H16O3	6.40278	-2.16399	197.117	pos	M+H-H2O, M+H, M+ACN+H, M+H-2H2O	100332	XEVQXKKKAVVSMW-WRWORJQWSA-N	C[C@@]12C[C@H](CC(C1=CC(=O)O2)(C)C)O	1		Organoheterocyclic compounds	Benzofurans		1.52069e+06
0.81_103.0637n	gamma-Aminobutyric acid	C4H9NO2	0.8108	3.84825	104.071	pos	M+H-H2O, M+H	119	BTCSSZJGUNDROE-UHFFFAOYSA-N	C(CC(=O)O)CN	-3.2	C00334	Organic acids and derivatives	Carboxylic acids and derivatives	Amino acids, peptides, and analogues	1.39518e+06
5.85_151.0397m/z	Vanillin	C8H8O3	5.85038	-2.53617	151.04	neg	M-H	1183	MWOOGOJBHIARFG-UHFFFAOYSA-N	COC1=C(C=CC(=C1)C=O)O	1.2	C00755	Benzenoids	Phenols	Methoxyphenols	1.39355e+06
1.03_243.0629m/z	Uridine	C9H12N2O6	1.02993	2.73513	243.063	neg	M-H	6029	DRTQHJPVMGBUCF-XVFCMESISA-N	C1=CN(C(=O)NC1=O)[C@H]2[C@@H]([C@@H]([C@H](O2)CO)O)O	-2	C00299	Nucleosides, nucleotides, and analogues	Pyrimidine nucleosides		1.36648e+06
3.66_153.0189m/z	Protocatechuic acid	C7H6O4	3.65662	-2.68206	153.019	neg	M-H	72	YQUVCSBJEUQKSH-UHFFFAOYSA-N	C1=CC(=C(C=C1C(=O)O)O)O	1.1	C00230	Benzenoids	Benzene and substituted derivatives	Benzoic acids and derivatives	1.31434e+06
8.41_361.0906m/z	5,7,3'-Trihydroxy-6,4',5'-trimethoxyflavone	C18H16O8	8.41495	-3.21578	361.091	pos	M+H	5496475	PMBOOVZSTMWOFS-UHFFFAOYSA-N	COC1=CC(=CC(=C1OC)O)C2=CC(=O)C3=C(O2)C=C(C(=C3O)OC)O	2.6	C04552	Phenylpropanoids and polyketides	Flavonoids	O-methylated flavonoids	1.30132e+06
2.52_218.1027m/z	Pantothenic acid	C9H17NO5	2.52208	-2.97234	218.103	neg	M-H	6613	GHOKWGTUZJEAQD-ZETCQYMHSA-N	CC(C)(CO)[C@H](C(=O)NCCC(=O)O)O	-1.1	C00864	Organic oxygen compounds	Organooxygen compounds	Alcohols and polyols	1.20744e+06
6.92_339.1228m/z	alpha-guaiaconic acid	C20H20O5	6.92015	-2.89214	339.123	neg	M-H	165795	OIXPKFRMEUTHOG-UHFFFAOYSA-N	CC1=C(OC(=C1C)C2=CC(=C(C=C2)O)OC)C3=CC(=C(C=C3)O)OC	4.3		Organoheterocyclic compounds	Furans	Diphenylfurans	1.10794e+06
8.85_180.1146n	Dihydroactinidiolide	C11H16O2	8.84733	-2.51107	181.122	pos	M+H, M+ACN+H, M+H-H2O, M+H-2H2O	27209	IMKHDCBNRDRUEB-UHFFFAOYSA-N	CC1(CCCC2(C1=CC(=O)O2)C)C	2.2		Organoheterocyclic compounds	Benzofurans		1.0972e+06
6.15_505.0979m/z	Quercetin 3-O-beta-glucopyranosyl-6'-acetate	C23H22O13	6.1479	-1.76349	505.098	neg	M-H									1.08247e+06
7.92_230.2474m/z	N,N-Dimethyldodecylamine N-oxide	C14H31NO	7.92032	-2.07058	230.247	pos	M+H	15433	SYELZBGXAIXKHU-UHFFFAOYSA-N	CCCCCCCCCCCC[N+](C)(C)[O-]	5.3		Organic nitrogen compounds	Organonitrogen compounds	Aminoxides	1.0678e+06
10.87_310.2136n	13S-Hydroperoxy-9Z,11E,15Z-octadecatrienoic acid	C18H30O4	10.8661	-2.47823	293.21	pos	M+H-H2O, M+H, M+ACN+H	5497123	UYQGVDXDXBAABN-FQSPHKRJSA-N	CC/C=C\C[C@@H](/C=C/C=C\CCCCCCCC(=O)O)OO	4.8		Lipids and lipid-like molecules	Fatty Acyls	Lineolic acids and derivatives	1.03723e+06
5.47_172.0975m/z	N-Acetyl-leucine	C8H15NO3	5.46552	-2.29244	172.098	neg	M-H	70912	WXNXCEHXYPACJF-ZETCQYMHSA-N	CC(C)C[C@@H](C(=O)O)NC(=O)C	0.5	C02710	Organic acids and derivatives	Carboxylic acids and derivatives	Amino acids, peptides, and analogues	1.01182e+06
4.23_261.1438m/z	gamma-Glutamylleucine	C11H20N2O5	4.2333	-2.54579	261.144	pos	M+H	151023	MYFMARDICOWMQP-YUMQZZPRSA-N	CC(C)C[C@@H](C(=O)O)NC(=O)CC[C@@H](C(=O)O)N	-2.4		Organic acids and derivatives	Carboxylic acids and derivatives	Amino acids, peptides, and analogues	1.00023e+06
10.79_303.1583m/z	Nordihydroguaiaretic acid	C18H22O4	10.7931	-2.54267	303.158	pos	M+H	4534	HCZKYJDFEPMADG-UHFFFAOYSA-N	CC(CC1=CC(=C(C=C1)O)O)C(C)CC2=CC(=C(C=C2)O)O	4.3	C10719	Lignans, neolignans and related compounds	Dibenzylbutane lignans		986577
0.82_243.0850n	Cytidine	C9H13N3O5	0.821567	-1.985	244.092	pos	M+H, 2M+Na, 2M+H	6175	UHDGCWIWMRVCDJ-XVFCMESISA-N	C1=CN(C(=O)N=C1N)[C@H]2[C@@H]([C@@H]([C@H](O2)CO)O)O	-2.1	C00475	Nucleosides, nucleotides, and analogues	Pyrimidine nucleosides		971251
11.53_219.1739m/z	Muurolladie-3-One	C15H22O	11.5287	-2.1023	219.174	pos	M+H	3989419	LMILVXQXGKTFSZ-UHFFFAOYSA-N	CC1=CCC(C2C1CC(=O)C(=C2)C)C(C)C	3.2		Lipids and lipid-like molecules	Prenol lipids	Sesquiterpenoids	939485
0.84_146.0921m/z	4-Guanidinobutanoic acid	C5H11N3O2	0.840283	-2.31742	146.092	pos	M+H	500	TUHVEAJXIMEOSA-UHFFFAOYSA-N	C(CC(=O)O)CN=C(N)N	-1.5		Organic acids and derivatives	Carboxylic acids and derivatives	Amino acids, peptides, and analogues	937193
7.91_331.0804m/z	3,7-Di-O-methylquercetin	C17H14O7	7.90968	-2.40999	331.08	pos	M+H	5280417	LUJAXSNNYBCFEE-UHFFFAOYSA-N	COC1=CC(=C2C(=C1)OC(=C(C2=O)OC)C3=CC(=C(C=C3)O)O)O	2.8	C01265	Phenylpropanoids and polyketides	Flavonoids	O-methylated flavonoids	908305
5.60_401.1081m/z	Gentiopicroside	C16H20O9	5.59642	-2.32703	401.108	neg	M+FA-H	88708	DUAGQYUORDTXOR-GPQRQXLASA-N	C=C[C@H]1[C@@H](OC=C2C1=CCOC2=O)O[C@H]3[C@@H]([C@H]([C@@H]([C@H](O3)CO)O)O)O	-1.2	C09782	Organic oxygen compounds	Organooxygen compounds	Carbohydrates and carbohydrate conjugates	841190
8.58_235.1687m/z	Curcumenol	C15H22O2	8.5798	-2.27386	235.169	pos	M+H	167812	ISFMXVMWEWLJGJ-NZBPQXDJSA-N	C[C@H]1CC[C@@H]2[C@]13CC(=C(C)C)[C@](O3)(C=C2C)O	2.2	C16942	Lipids and lipid-like molecules	Prenol lipids	Sesquiterpenoids	835773
7.17_327.1220m/z	7-Acetoxy-2-methylisoflavone	C18H14O4	7.17002	-2.53229	327.122	pos	M+CH3OH+H									810939
8.31_261.1115m/z	7-O-Prenylscopoletin	C15H16O4	8.30978	-2.28276	261.112	pos	M+H	1764914	ZLPLFUBVEZVYDX-UHFFFAOYSA-N	CC(=CCOC1=C(C=C2C=CC(=O)OC2=C1)OC)C	3.4		Phenylpropanoids and polyketides	Coumarins and derivatives		802341
11.69_294.2187n	9-Oxo-10E,12Z-octadecadienoic acid	C18H30O3	11.6911	-2.54018	295.226	pos	M+H, M+Na	9839084	LUZSWWYKKLTDHU-ZJHFMPGASA-N	CCCCC/C=C\C=C\C(=O)CCCCCCCC(=O)O	5.2		Lipids and lipid-like molecules	Fatty Acyls	Lineolic acids and derivatives	781336
7.04_428.1669n	1-[3-[(4-fluorophenyl)methyl]-4-oxothieno[3,2-d]pyrimidin-2-yl]-N-propylpiperidine-4-carboxamide	C22H25FN4O2S	7.04355	-3.04023	429.174	pos	M+Na, 2M+H, M+K, M+NH4, M+H, M+H-H2O, M+H-2H2O									758099
1.57_283.0676m/z	xanthosine	C10H12N4O6	1.57432	-2.90081	283.068	neg	M-H	64959	UBORTCNDUKBEOP-UUOKFMHZSA-N	C1=NC2=C(N1[C@H]3[C@@H]([C@@H]([C@H](O3)CO)O)O)NC(=O)NC2=O	-2.4	C01762	Nucleosides, nucleotides, and analogues	Purine nucleosides		751565
9.77_312.2293n	9-Hydroxy-10,12-octadecadienoic acid	C18H32O4	9.76813	-2.333	311.222	neg	M-H2O-H, M-H	5282945	NPDSHTNEKLQQIJ-SIGMCMEVSA-N	CCCCC/C=C/C=C/C(CCCCCCCC(=O)O)O	5.3	C21923	Lipids and lipid-like molecules	Fatty Acyls	Lineolic acids and derivatives	733668
10.20_351.2521m/z	(E)-5-(1,2,4a,5-tetramethyl-7-oxo-3,4,8,8a-tetrahydro-2H-naphthalen-1-yl)-3-methylpent-2-enoic acid	C20H30O3	10.1988	-2.80631	351.252	pos	M+CH3OH+H	13918478	SLMFLTPPPXRYHP-JLHYYAGUSA-N	CC1CCC2(C(C1(C)CC/C(=C/C(=O)O)/C)CC(=O)C=C2C)C	4.8		Lipids and lipid-like molecules	Prenol lipids	Diterpenoids	731891
5.29_447.0922m/z	Isoorientin	C21H20O11	5.28958	-2.32403	447.092	neg	M-H	114776	ODBRNZZJSYPIDI-VJXVFPJBSA-N	C1=CC(=C(C=C1C2=CC(=O)C3=C(O2)C=C(C(=C3O)[C@H]4[C@@H]([C@H]([C@@H]([C@H](O4)CO)O)O)O)O)O)O	-0.2	C01821	Phenylpropanoids and polyketides	Flavonoids	Flavonoid glycosides	722507
10.75_476.2772m/z	PE(18:2/0:0)	C23H44NO7P	10.7501	-2.16845	476.277	neg	M-H	9547068	BBYWOYAFBUOUFP-JOCHJYFZSA-N	CCCCCCCCCCCCCCCCCC(=O)OC[C@H](COP(=O)(O)OCCN)O	3.4		Lipids and lipid-like molecules	Glycerophospholipids	Glycerophosphoethanolamines	706048
5.05_377.1447m/z	Flavin mononucleotide	C17H20N4O6	5.05055	-2.40482	377.145	pos	M+H	643976	FVTCRASFADXXNN-SCRDCRAPSA-N	CC1=CC2=C(C=C1C)N(C3=NC(=O)NC(=O)C3=N2)C[C@@H]([C@@H]([C@@H](COP(=O)(O)O)O)O)O	-2.6	C00061	Nucleosides, nucleotides, and analogues	Flavin nucleotides		703227
3.63_118.0651m/z	2-Aminoacetophenone	C8H9NO	3.6343	0.0660587	118.065	pos	M+H-H2O	11952	HEQOJEGTZCTHCF-UHFFFAOYSA-N	C1=CC=C(C=C1)C(=O)CN	0.8		Organic oxygen compounds	Organooxygen compounds	Carbonyl compounds	697592
4.70_337.1017m/z	N-[4-(dimethylsulfamoyl)phenyl]-2-(4-fluorophenyl)acetamide	C16H17FN2O3S	4.6955	0.00232897	337.102	pos	M+H									653052
5.40_165.0189m/z	Phthalic acid	C8H6O4	5.40348	-2.80619	165.019	neg	M-H	1017	XNGIFLGASWRNHJ-UHFFFAOYSA-N	C1=CC=C(C(=C1)C(=O)O)C(=O)O	0.7	C01606	Benzenoids	Benzene and substituted derivatives	Benzoic acids and derivatives	631576
5.98_181.0502m/z	Syringaldehyde	C9H10O4	5.97972	-2.17245	181.05	neg	M-H	8655	KCDXJAYRVLXPFO-UHFFFAOYSA-N	COC1=CC(=CC(=C1O)OC)C=O	0		Benzenoids	Phenols	Methoxyphenols	590484
3.63_174.0790n	Indole-3-acetamide	C10H10N2O	3.6343	-1.91949	175.086	pos	M+H-H2O, M+H	397	ZOAMBXDOGPRZLP-UHFFFAOYSA-N	C1=CC=C2C(=C1)C(=CN2)CC(=O)N	0.8	C02693	Organoheterocyclic compounds	Indoles and derivatives	Indoles	548204
0.89_348.0695m/z	3'-AMP	C10H14N5O7P	0.89425	-2.50979	348.069	pos	M+H	41211	LNQVTSROQXJCDD-KQYNXXCUSA-N	C1=NC(=C2C(=N1)N(C=N2)[C@H]3[C@@H]([C@@H]([C@H](O3)CO)OP(=O)(O)O)O)N	-2.7	C01367	Nucleosides, nucleotides, and analogues	Ribonucleoside 3'-phosphates		500048
6.16_551.1021m/z	Quercetin 3-O-malonylglucoside	C24H22O15	6.15927	-1.81801	551.102	pos	M+H	5282159	NBQPHANHNTWDML-UJKBSQBPSA-N	C1=CC(=C(C=C1C2=C(C(=O)C3=C(C=C(C=C3O2)O)O)O[C@H]4[C@@H]([C@H]([C@@H]([C@H](O4)COC(=O)CC(=O)O)O)O)O)O)O	0.1	C12638	Phenylpropanoids and polyketides	Flavonoids	Flavonoid glycosides	499271
5.10_167.0345m/z	Vanillic acid	C8H8O4	5.0956	-2.59883	167.035	neg	M-H	8468	WKOLLVMJNQIZCI-UHFFFAOYSA-N	COC1=C(C=CC(=C1)C(=O)O)O	1.4	C06672	Benzenoids	Benzene and substituted derivatives	Benzoic acids and derivatives	481185
6.23_479.1174m/z	Isorhamnetin-3-galactoside	C22H22O12	6.22755	-2.08289	479.117	pos	M+H	13245586	CQLRUIIRRZYHHS-UHFFFAOYSA-N	COC1=C(C=CC(=C1)C2=C(C(=O)C3=C(C=C(C=C3O2)O)O)OC4C(C(C(C(O4)CO)O)O)O)O	0.7		Phenylpropanoids and polyketides	Flavonoids	Flavonoid glycosides	462888
4.70_401.1069m/z	4-(4-chlorophenoxy)-N-[5-methyl-4-(4-methylphenyl)-1,3-thiazol-2-yl]butanamide	C21H21ClN2O2S	4.6955	-4.00735	401.107	pos	M+H									461752
14.81_857.5163n	GPSer(22:6/20:3)	C48H76NO10P	14.8067	-5.16601	858.524	pos	M+H, M+Na									459536
7.09_359.0763m/z	Centaureidin	C18H16O8	7.08875	-2.50687	359.076	neg	M-H	5315773	BZXULYMZYPRZOG-UHFFFAOYSA-N	COC1=C(C=C(C=C1)C2=C(C(=O)C3=C(O2)C=C(C(=C3O)OC)O)OC)O	2.8		Phenylpropanoids and polyketides	Flavonoids	O-methylated flavonoids	448952
9.10_387.2269m/z	MDL 72832 HCL	C22H30N2O4	9.10157	-2.29669	387.227	pos	M+H									443406
5.98_183.0649m/z	4-Hydroxy-3,5-dimethoxybenzaldehyde	C9H10O4	5.98267	-1.77566	183.065	pos	M+H	8655	KCDXJAYRVLXPFO-UHFFFAOYSA-N	COC1=CC(=CC(=C1O)OC)C=O	0	C02201	Benzenoids	Phenols	Methoxyphenols	433796
0.82_360.1491m/z	-Gentiobiose	C12H22O11	0.821567	-2.78675	360.149	pos	M+NH4	441422	DLRVVLDZNNYCBX-LIZSDCNHSA-N	C([C@@H]1[C@H]([C@@H]([C@H]([C@@H](O1)OC[C@@H]2[C@H]([C@@H]([C@H]([C@@H](O2)O)O)O)O)O)O)O)O	-4.7	C08240	Organic oxygen compounds	Organooxygen compounds	Carbohydrates and carbohydrate conjugates	433487
5.35_959.1720m/z	Myricetin-3-O-galactoside	C21H20O13	5.35247	-1.56168	959.172	neg	2M-H	5491408	FOHXFLPXBUAOJM-MGMURXEASA-N	C1=C(C=C(C(=C1O)O)O)C2=C(C(=O)C3=C(C=C(C=C3O2)O)O)O[C@H]4[C@@H]([C@H]([C@H]([C@H](O4)CO)O)O)O	0		Phenylpropanoids and polyketides	Flavonoids	Flavonoid glycosides	433474
8.48_369.1324m/z	Isopsoralidin	C20H16O5	8.48395	-2.51488	369.132	pos	M+CH3OH+H	12304285	JWCDJOWFOVBBCP-UHFFFAOYSA-N	CC1(CCC2=CC3=C(C=C2O1)OC(=O)C4=C3OC5=C4C=CC(=C5)O)C	4.1		Phenylpropanoids and polyketides	Isoflavonoids	Coumestans	418765
6.13_299.0189m/z	Irigenol	C15H10O8	6.12753	-2.71522	299.019	neg	M-H2O-H									388530
5.53_177.0553m/z	Coniferaldehyde	C10H10O3	5.52565	-2.53857	177.055	neg	M-H	5280536	DKZBBWMURDFHNE-NSCUHMNNSA-N	COC1=C(C=CC(=C1)/C=C/C=O)O	1.5	C02666	Benzenoids	Phenols	Methoxyphenols	387371
4.74_149.0595m/z	(E)-Cinnamic acid	C9H8O2	4.73788	-1.69515	149.059	pos	M+H	444539	WBYWAXJHAXSJNI-VOTSOKGWSA-N	C1=CC=C(C=C1)/C=C/C(=O)O	2.1	C10438	Phenylpropanoids and polyketides	Cinnamic acids and derivatives	Cinnamic acids	374043
6.21_477.1024m/z	Isorhamnetin-3-O-glucoside	C22H22O12	6.21292	-3.07228	477.102	neg	M-H	5318645	CQLRUIIRRZYHHS-LFXZADKFSA-N	COC1=C(C=CC(=C1)C2=C(C(=O)C3=C(C=C(C=C3O2)O)O)O[C@H]4[C@@H]([C@H]([C@@H]([C@H](O4)CO)O)O)O)O	0.7	C22589	Phenylpropanoids and polyketides	Flavonoids	Flavonoid glycosides	371547
5.19_565.1554m/z	Corymboside	C26H28O14	5.19045	0.300749	565.155	pos	M+H	13644660	OVMFOVNOXASTPA-UHFFFAOYSA-N	C1C(C(C(C(O1)C2=C(C(=C3C(=C2O)C(=O)C=C(O3)C4=CC=C(C=C4)O)C5C(C(C(C(O5)CO)O)O)O)O)O)O)O	-2.2		Phenylpropanoids and polyketides	Flavonoids	Flavonoid glycosides	365976
6.43_133.1010m/z	Cumic alcohol	C10H14O	6.42505	-1.33619	133.101	pos	M+H-H2O	325	OIGWAXDAPKFNCQ-UHFFFAOYSA-N	CC(C)C1=CC=C(C=C1)CO	2.3	C06576	Lipids and lipid-like molecules	Prenol lipids	Monoterpenoids	361427
0.84_99.0443m/z	Tulipalin A	C5H6O2	0.840283	2.51506	99.0443	pos	M+H	68352	GSLDEZOOOSBFGP-UHFFFAOYSA-N	C=C1CCOC1=O	0.8	C20578	Organoheterocyclic compounds	Lactones	Gamma butyrolactones	355979
6.44_243.1230m/z	4-Oxododecanedioic acid	C12H20O5	6.43565	-3.17996	243.123	neg	M-H	13213508	HHXMOTDTSDYYEI-UHFFFAOYSA-N	C(CCCC(=O)CCC(=O)O)CCCC(=O)O	1.1		Organic acids and derivatives	Keto acids and derivatives	Medium-chain keto acids and derivatives	351520
5.76_303.0492m/z	quercetin	C15H10O7	5.75683	-2.36778	303.049	pos	M+H	5280343	REFJWTPEDVJJIY-UHFFFAOYSA-N	C1=CC(=C(C=C1C2=C(C(=O)C3=C(C=C(C=C3O2)O)O)O)O)O	1.5	C00389	Phenylpropanoids and polyketides	Flavonoids	Flavones	350173
5.84_227.0910m/z	Isoferulic Acid	C10H10O4	5.83575	-2.30847	227.091	pos	M+CH3OH+H	736186	QURCVMIEKCOAJU-HWKANZROSA-N	COC1=C(C=C(C=C1)/C=C/C(=O)O)O	1.5	C10470	Phenylpropanoids and polyketides	Cinnamic acids and derivatives	Hydroxycinnamic acids and derivatives	349637
6.38_306.1362m/z	Brevicarine	C17H21N3	6.37967	-1.89249	306.136	pos	M+K	5490034	OMGIBPZQATWNBX-UHFFFAOYSA-N	CC1=NC=C(C2=C1NC3=CC=CC=C32)CCCCNC	3.3		Alkaloids and derivatives	Harmala alkaloids		345717
1.03_181.0735n	L-Tyrosine	C9H11NO3	1.02993	-2.38027	180.066	neg	M-H, M+Cl	6057	OUYCCCASQSFEME-QMMMGPOBSA-N	C1=CC(=CC=C1C[C@@H](C(=O)O)N)O	-2.3	C00082	Organic acids and derivatives	Carboxylic acids and derivatives	Amino acids, peptides, and analogues	343351
0.86_323.0277m/z	Uridine 5'-monophosphate	C9H13N2O9P	0.861783	-2.8557	323.028	neg	M-H	6030	DJJCXFVJDGTHFX-XVFCMESISA-N	C1=CN(C(=O)NC1=O)[C@H]2[C@@H]([C@@H]([C@H](O2)COP(=O)(O)O)O)O	-3.6	C00105	Nucleosides, nucleotides, and analogues	Pyrimidine nucleotides	Pyrimidine ribonucleotides	339956
9.23_328.2299m/z	Altrenogest	C21H26O2	9.23203	8.94887	328.23	pos	M+NH4									337968
3.67_197.0450m/z	Syringic acid	C9H10O5	3.66838	-2.68812	197.045	neg	M-H	10742	JMSVCTWVEWCHDZ-UHFFFAOYSA-N	COC1=CC(=CC(=C1O)OC)C(=O)O	1	C10833	Benzenoids	Benzene and substituted derivatives	Benzoic acids and derivatives	336837
5.95_161.0594m/z	6-Methylcoumarin	C10H8O2	5.94685	-1.96934	161.059	pos	M+H	7092	FXFYOPQLGGEACP-UHFFFAOYSA-N	CC1=CC2=C(C=C1)OC(=O)C=C2	1.8		Phenylpropanoids and polyketides	Coumarins and derivatives		329712
5.67_433.1126m/z	Vitexin	C21H20O10	5.66643	-0.732791	433.113	pos	M+H	5280441	SGEWCQFRYRRZDC-VPRICQMDSA-N	C1=CC(=CC=C1C2=CC(=O)C3=C(O2)C(=C(C=C3O)O)[C@H]4[C@@H]([C@H]([C@@H]([C@H](O4)CO)O)O)O)O	0.2	C01460	Phenylpropanoids and polyketides	Flavonoids	Flavonoid glycosides	324905
10.15_480.3076m/z	PC(15:1/0:0)	C23H46NO7P	10.1516	-1.7664	480.308	pos	M+H	24779458	RJZVWDTYEWCUAR-JOCHJYFZSA-N	CCCCCCCCCCCCCCC(=O)OC[C@H](COP(=O)([O-])OCC[N+](C)(C)C)O	5		Lipids and lipid-like molecules	Glycerophospholipids	Glycerophosphocholines	315621
8.71_302.3046m/z	Sphinganine	C18H39NO2	8.70905	-2.35934	302.305	pos	M+H	91486	OTKJDMGTUTTYMP-ZWKOTPCHSA-N	CCCCCCCCCCCCCCC[C@H]([C@H](CO)N)O	5.8	C00836	Organic nitrogen compounds	Organonitrogen compounds	Amines	307285
9.87_233.1103m/z	N-Cyclohexyl-2-benzothiazol-amine	C13H16N2S	9.86887	-1.76127	233.11	pos	M+H	591790	UPWPIFMHSFSVLE-UHFFFAOYSA-N	C1CCC(CC1)NC2=NC3=CC=CC=C3S2	4.4		Organoheterocyclic compounds	Benzothiazoles		307249
3.94_197.0450m/z	2-Hydroxy-3,4-Dimethoxybenzoic Acid	C9H10O5	3.93693	-2.6734	197.045	neg	M-H	79737	CJFQIVAOBBTJCI-UHFFFAOYSA-N	COC1=C(C(=C(C=C1)C(=O)O)O)OC	1.9		Benzenoids	Benzene and substituted derivatives	Benzoic acids and derivatives	300035
6.69_137.0240m/z	p-Hydroxybenzoic acid	C7H6O3	6.6949	-2.71861	137.024	neg	M-H	135	FJKROLUGYXJWQN-UHFFFAOYSA-N	C1=CC(=CC=C1C(=O)O)O	1.6	C00156	Benzenoids	Benzene and substituted derivatives	Benzoic acids and derivatives	295408
1.36_126.0315n	1,3,5-Trihydroxybenzene	C6H6O3	1.36178	-1.7858	144.065	pos	M+NH4, M+ACN+H	359	QCDYQQDYXPDABM-UHFFFAOYSA-N	C1=C(C=C(C=C1O)O)O	0.2	C02183	Benzenoids	Phenols	Benzenetriols and derivatives	293225
11.58_522.3543m/z	PC(18:1/0:0)	C26H52NO7P	11.5786	-2.06931	522.354	pos	M+H	16081932	YAMUFBLWGFFICM-PTGWMXDISA-N	CCCCCCCC/C=C\CCCCCCCC(=O)OC[C@H](COP(=O)([O-])OCC[N+](C)(C)C)O	5.7		Lipids and lipid-like molecules	Glycerophospholipids	Glycerophosphocholines	289424
4.53_293.1139m/z	Glutamylphenylalanine	C14H18N2O5	4.52912	-1.50468	293.114	neg	M-H	111299	XHHOHZPNYFQJKL-QWRGUYRKSA-N	C1=CC=C(C=C1)C[C@@H](C(=O)O)NC(=O)CC[C@@H](C(=O)O)N	-3		Organic acids and derivatives	Carboxylic acids and derivatives	Amino acids, peptides, and analogues	273983
6.22_99.0807m/z	2-Hexenal	C6H10O	6.21638	2.54059	99.0807	pos	M+H					C08497				263341
4.21_179.0346m/z	caffeic acid	C9H8O4	4.20835	-2.33571	179.035	neg	M-H	689043	QAIPRVGONGVQAS-DUXPYHPUSA-N	C1=CC(=C(C=C1/C=C/C(=O)O)O)O	1.2	C01481	Phenylpropanoids and polyketides	Cinnamic acids and derivatives	Hydroxycinnamic acids and derivatives	249591
5.46_133.0646m/z	cinnamaldehyde	C9H8O	5.45875	-1.45893	133.065	pos	M+H	637511	KJPRLNWUNMBNBZ-QPJJXVBHSA-N	C1=CC=C(C=C1)/C=C/C=O	1.9	C00903	Phenylpropanoids and polyketides	Cinnamaldehydes		245010
10.08_170.0727n	2-Hyroxybiphenyl	C12H10O	10.0821	-2.9801	171.08	pos	M+H, M+ACN+H, M+H-H2O					C02499				243822
6.49_357.1336m/z	Pinoresinol	C20H22O6	6.48685	-2.23956	357.134	neg	M-H	73399	HGXBRUKMWQGOIE-AFHBHXEDSA-N	COC1=C(C=CC(=C1)[C@@H]2[C@H]3CO[C@@H]([C@H]3CO2)C4=CC(=C(C=C4)O)OC)O	2.3	C05366	Lignans, neolignans and related compounds	Furanoid lignans		242506
8.13_325.2001m/z	(2E,4E)-12-hydroxy-13-(hydroxymethyl)-3,5,7-trimethyltetradeca-2,4-dienedioic acid	C18H30O6	8.1322	-2.43931	325.2	pos	M+H-H2O	10405119	QFZISQBFEIXWDM-UTLPMFLDSA-N	CC(CCCCC(C(CO)C(=O)O)O)C/C(=C/C(=C/C(=O)O)/C)/C	3.2		Lipids and lipid-like molecules	Fatty Acyls	Fatty acids and conjugates	240741
7.60_233.1531m/z	Costunolide	C15H20O2	7.6033	-2.29773	233.153	pos	M+H	5281437	HRYLQFBHBWLLLL-AHNJNIBGSA-N	C/C/1=C\CC/C(=C/[C@@H]2[C@@H](CC1)C(=C)C(=O)O2)/C	2.1	C09382	Lipids and lipid-like molecules	Prenol lipids	Terpene lactones	239846
2.27_156.0662m/z	N-Acetyl-proline	C7H11NO3	2.26707	-2.45606	156.066	neg	M-H	322640	GNMSLDIYJOSUSW-UHFFFAOYSA-N	CC(=O)N1CCCC1C(=O)O	-0.7		Organic acids and derivatives	Carboxylic acids and derivatives	Amino acids, peptides, and analogues	238910
5.61_207.0657m/z	Sinapaldehyde	C11H12O4	5.60717	-2.61742	207.066	neg	M-H	5280802	CDICDSOGTRCHMG-ONEGZZNKSA-N	COC1=CC(=CC(=C1O)OC)/C=C/C=O	1.4	C05610	Benzenoids	Phenols	Methoxyphenols	229123
4.62_160.0521n	2,6-Dihydroxynaphthalene	C10H8O2	4.6153	-2.1384	193.086	pos	M+H, 2M+ACN+H, M+CH3OH+H	93552	MNZMMCVIXORAQL-UHFFFAOYSA-N	C1=CC2=C(C=CC(=C2)O)C=C1O	2.3	C16213	Benzenoids	Naphthalenes	Naphthols and derivatives	228919
5.65_431.0972m/z	Saponaretin	C21H20O10	5.64888	-2.63019	431.097	neg	M-H					C01714				228091
6.60_493.1331m/z	6-Hydroxyluteolin 6,3'-dimethyl ether 7-glucoside	C23H24O12	6.60338	-1.84436	493.133	pos	M+H	44258501	YFZSQPRYLBGYKE-SLYRBRRESA-N	COC1=C(C=CC(=C1)C2=CC(=O)C3=C(C(=C(C=C3O2)O[C@H]4C([C@H]([C@@H](C(O4)CO)O)O)O)OC)O)O	0.8		Phenylpropanoids and polyketides	Flavonoids	Flavonoid glycosides	227934
0.83_221.0896n	N-Acetyl-D-Glucosamine	C8H15NO6	0.831017	-1.70479	222.097	pos	M+H, M+H-2H2O	439174	OVRNDRQMDRJTHS-RTRLPJTCSA-N	CC(=O)N[C@@H]1[C@H]([C@@H]([C@H](OC1O)CO)O)O	-1.7	C00140	Organic oxygen compounds	Organooxygen compounds	Carbohydrates and carbohydrate conjugates	225779
6.09_191.0699m/z	6-Methoxy-4-methylcoumarin	C11H10O3	6.09282	-2.09148	191.07	pos	M+H	223821	KNGPIBWCWOQBEK-UHFFFAOYSA-N	CC1=CC(=O)OC2=C1C=C(C=C2)OC	2.2		Phenylpropanoids and polyketides	Coumarins and derivatives		224465
0.91_383.1183m/z	Quinic acid	C7H12O6	0.91045	-3.07894	383.118	neg	2M-H	6508	AAWZDTNXLSGCEK-LNVDRNJUSA-N	C1[C@H](C([C@@H](CC1(C(=O)O)O)O)O)O	-2.4	C00296	Organic oxygen compounds	Organooxygen compounds	Alcohols and polyols	222948
1.03_123.0440m/z	4-Hydroxybenzaldehyde	C7H6O2	1.02553	-0.111172	123.044	pos	M+H	126	RGHHSNMVTDWUBI-UHFFFAOYSA-N	C1=CC(=CC=C1C=O)O	1.4	C00633	Organic oxygen compounds	Organooxygen compounds	Carbonyl compounds	218210
5.22_225.0763m/z	Ethyl syringate	C11H14O5	5.21757	-2.35332	225.076	neg	M-H	19845	WKUVKFZZCHINKG-UHFFFAOYSA-N	CCOC(=O)C1=CC(=C(C(=C1)OC)O)OC	1.7		Benzenoids	Benzene and substituted derivatives	Benzoic acids and derivatives	213817
0.85_174.1121m/z	swainsonine	C8H15NO3	0.848983	-1.88655	174.112	pos	M+H	51683	FXUAIOOAOAVCGD-WCTZXXKLSA-N	C1C[C@H]([C@@H]2[C@@H]([C@@H](CN2C1)O)O)O	-1.3	C10173	Organoheterocyclic compounds	Indolizidines		212806
3.65_109.0292m/z	Pyrocatechol	C6H6O2	3.64662	-3.08043	109.029	neg	M-H	289	YCIMNLLNPGFGHC-UHFFFAOYSA-N	C1=CC=C(C(=C1)O)O	0.9	C00090	Benzenoids	Phenols	Benzenediols	212248
2.58_282.1191m/z	2'-O-Methyladenosine	C11H15N5O4	2.58262	-2.20729	282.119	pos	M+H	102213	FPUGCISOLXNPPC-IOSLPCCCSA-N	CO[C@@H]1[C@@H]([C@H](O[C@H]1N2C=NC3=C(N=CN=C32)N)CO)O	-0.5		Nucleosides, nucleotides, and analogues	Purine nucleosides		203760
1.34_152.0564m/z	Guanine	C5H5N5O	1.34035	-1.80985	152.056	pos	M+H	135398634	UYTPUPDQBNUYGX-UHFFFAOYSA-N	C1=NC2=C(N1)C(=O)NC(=N2)N	-1.1	C00242	Organoheterocyclic compounds	Imidazopyrimidines	Purines and purine derivatives	201728
4.83_287.0542m/z	Scutellarein	C15H10O6	4.82712	-2.77809	287.054	pos	M+H	5281697	JVXZRQGOGOXCEC-UHFFFAOYSA-N	C1=CC(=CC=C1C2=CC(=O)C3=C(O2)C=C(C(=C3O)O)O)O	1.4	C10184	Phenylpropanoids and polyketides	Flavonoids	Flavones	200952
10.61_311.2207m/z	9-Oxo-12,13-Epoxy-10-Octadecenoic acid	C18H30O4	10.6101	-3.17293	311.221	pos	M+H	5283007	RCMABBHQYMBYKV-BUHFOSPRSA-N	CCCCCC1C(O1)/C=C/C(=O)CCCCCCCC(=O)O	4		Lipids and lipid-like molecules	Fatty Acyls	Fatty acids and conjugates	197492
8.27_248.1407n	1-Hydroxy-4(15),11(13)-eudesmadien-12,6-olide	C15H20O3	8.27448	-2.15154	249.148	pos	M+H, M+CH3OH+H									185735
7.06_163.0761m/z	Isoeugenol	C10H12O2	7.05685	-2.27488	163.076	neg	M-H	853433	BJIOGJUNALELMI-ONEGZZNKSA-N	C/C=C/C1=CC(=C(C=C1)O)OC	2.6	C10469	Benzenoids	Phenols	Methoxyphenols	184956
7.89_329.0659m/z	3,6-Dimethoxyapigenin	C17H14O7	7.88715	-2.33255	329.066	neg	M-H									183617
11.49_198.1041n	o-Methylbenzhydrol	C14H14O	11.4919	-2.07245	181.101	pos	M+H-H2O, M+H	95659	MXHXXJOHFRHBFB-UHFFFAOYSA-N	CC1=CC=CC=C1C(C2=CC=CC=C2)O	3.1		Benzenoids	Benzene and substituted derivatives	Diphenylmethanes	181567
7.86_353.1373m/z	Corylin	C20H16O4	7.86372	-3.1972	353.137	pos	M+CH3OH+H	5316097	PWAACAMQKVIVPZ-UHFFFAOYSA-N	CC1(C=CC2=C(O1)C=CC(=C2)C3=COC4=C(C3=O)C=CC(=C4)O)C	3.7		Phenylpropanoids and polyketides	Isoflavonoids	Pyranoisoflavonoids	179641
0.90_187.0720m/z	NAlpha-Acetyl-L-glutamine	C7H12N2O4	0.899833	-2.51338	187.072	neg	M-H	182230	KSMRODHGGIIXDV-YFKPBYRVSA-N	CC(=O)N[C@@H](CCC(=O)N)C(=O)O	-1.4		Organic acids and derivatives	Carboxylic acids and derivatives	Amino acids, peptides, and analogues	178580
7.37_207.0648m/z	Scoparone	C11H10O4	7.36903	-2.0089	207.065	pos	M+H	8417	GUAFOGOEJLSQBT-UHFFFAOYSA-N	COC1=C(C=C2C(=C1)C=CC(=O)O2)OC	1.9	C09311	Phenylpropanoids and polyketides	Coumarins and derivatives		175712
2.30_146.1172m/z	N-Methylisoleucine	C7H15NO2	2.29983	-2.36422	146.117	pos	M+H	560437	KSPIYJQBLVDRRI-UHFFFAOYSA-N	CCC(C)C(C(=O)O)NC	-1.8		Organic acids and derivatives	Carboxylic acids and derivatives	Amino acids, peptides, and analogues	175273
4.74_429.1327m/z	Morroniside	C17H26O11	4.73788	-9.89381	429.133	pos	M+Na	11228693	YTZSBJLNMIQROD-SFBCHFHNSA-N	C[C@H]1[C@@H]2[C@H](C[C@@H](O1)O)C(=CO[C@H]2O[C@H]3[C@@H]([C@H]([C@@H]([C@H](O3)CO)O)O)O)C(=O)OC	-1.8	C17000	Organic oxygen compounds	Organooxygen compounds	Carbohydrates and carbohydrate conjugates	172335
5.76_242.1745m/z	1,2,4-Trideoxy-3-C-methyl-4-{[(2E,4E)-2-methyl-2,4-hexadienoyl]amino}pentitol	C13H23NO3	5.75683	-2.2095	242.175	pos	M+H									170503
5.35_463.1227m/z	Swertiajaponin	C22H22O11	5.34753	-1.63817	463.123	pos	M+H	442659	DLVLXOYLQKCAME-DGHBBABESA-N	COC1=C(C(=C2C(=C1)OC(=CC2=O)C3=CC(=C(C=C3)O)O)O)[C@H]4[C@@H]([C@H]([C@@H]([C@H](O4)CO)O)O)O	0.2	C10187	Phenylpropanoids and polyketides	Flavonoids	Flavonoid glycosides	168344
1.03_284.0983m/z	Guanosine	C10H13N5O5	1.03448	-2.41588	284.098	pos	M+H	135398635	NYHBQMYGNKIUIF-UUOKFMHZSA-N	C1=NC2=C(N1[C@H]3[C@@H]([C@@H]([C@H](O3)CO)O)O)N=C(NC2=O)N	-1.9	C00387	Nucleosides, nucleotides, and analogues	Purine nucleosides		162729
7.79_247.1334m/z	Pechueloic Acid	C15H20O3	7.79167	-2.40411	247.133	neg	M-H	24094149	ZFHSKBJBODQVBX-AXTRIDKLSA-N	C[C@H]1CC[C@H](CC2=C(C(=O)C[C@@H]12)C)C(=C)C(=O)O	2.4		Lipids and lipid-like molecules	Prenol lipids	Sesquiterpenoids	162579
5.36_206.0808m/z	Indolelactic acid	C11H11NO3	5.35922	-1.70684	206.081	pos	M+H	92904	XGILAAMKEQUXLS-UHFFFAOYSA-N	C1=CC=C2C(=C1)C(=CN2)CC(C(=O)O)O	1.5		Organoheterocyclic compounds	Indoles and derivatives	Indolyl carboxylic acids and derivatives	156028
7.53_269.0812m/z	2',5'-Dihydroxy-4-methoxychalcone	C16H14O4	7.52822	-2.64447	269.081	neg	M-H									153084
5.65_503.1901m/z	Olivil 4'-O-Glucoside	C26H34O12	5.64507	-2.08259	503.19	pos	M+H-2H2O	14033815	SXGSYHDLSPXCMU-CTQTXEDXSA-N	COC1=C(C=CC(=C1)C[C@]2(CO[C@@H]([C@H]2CO)C3=CC(=C(C=C3)O)OC)O)O[C@H]4[C@@H]([C@H]([C@@H]([C@H](O4)CO)O)O)O	0.1		Lignans, neolignans and related compounds	Lignan glycosides		151781
10.04_468.3074m/z	PC(14:0/0:0)	C22H46NO7P	10.0355	-2.31023	468.307	pos	M+H	24779456	JXGLGTFMAQOJBB-HEDKFQSOSA-N	CCCC/C=C\CCCCCCCC(=O)OC[C@H](COP(=O)([O-])OCC[N+](C)(C)C)O	3.5		Lipids and lipid-like molecules	Glycerophospholipids	Glycerophosphocholines	151256
5.99_174.0556m/z	Indoleacetic acid	C10H9NO2	5.98958	-2.67928	174.056	neg	M-H	802	SEOVTRFCIGRIMH-UHFFFAOYSA-N	C1=CC=C2C(=C1)C(=CN2)CC(=O)O	1.4	C00954	Organoheterocyclic compounds	Indoles and derivatives	Indolyl carboxylic acids and derivatives	141176
6.40_135.1166m/z	Perilla alcohol	C10H16O	6.40278	-1.47049	135.117	pos	M+H-H2O	10819	NDTYTMIUWGWIMO-UHFFFAOYSA-N	CC(=C)C1CCC(=CC1)CO	2.1		Lipids and lipid-like molecules	Prenol lipids	Monoterpenoids	140955
7.16_263.1282m/z	(+)-Abscisic acid	C15H20O4	7.15988	-2.6738	263.128	neg	M-H	5280896	JLIDBLDQVAYHNE-YKALOCIXSA-N	CC1=CC(=O)CC([C@]1(/C=C/C(=C\C(=O)O)/C)O)(C)C	1.6	C06082	Lipids and lipid-like molecules	Prenol lipids	Sesquiterpenoids	139807
5.39_369.1173m/z	3-O-Feruloylquinic acid	C17H20O9	5.3928	-1.94776	369.117	pos	M+H	9799386	RAGZUCNPTLULOL-KJJWLSQTSA-N	COC1=C(C=CC(=C1)/C=C/C(=O)O[C@@H]2C[C@@](C[C@H]([C@H]2O)O)(C(=O)O)O)O	-0.1	C02572	Organic oxygen compounds	Organooxygen compounds	Alcohols and polyols	139714
8.08_177.0542m/z	ferulic acid	C10H10O4	8.07818	-1.91609	177.054	pos	M+H-H2O	445858	KSEBMYQBYZTDHS-HWKANZROSA-N	COC1=C(C=CC(=C1)/C=C/C(=O)O)O	1.5	C01494	Phenylpropanoids and polyketides	Cinnamic acids and derivatives	Hydroxycinnamic acids and derivatives	138779
3.46_346.1254n	4-Hydroxy-3,5-dimethoxybenzyl -D-glucopyranoside	C15H22O9	3.4634	-2.80323	369.115	pos	M+Na, 2M+Na, M+NH4									137572
6.17_449.1068m/z	Cynaroside	C21H20O11	6.16943	-2.30575	449.107	pos	M+H	5280637	PEFNSGRTCBGNAN-QNDFHXLGSA-N	C1=CC(=C(C=C1C2=CC(=O)C3=C(C=C(C=C3O2)O[C@H]4[C@@H]([C@H]([C@@H]([C@H](O4)CO)O)O)O)O)O)O	0.5	C03951	Phenylpropanoids and polyketides	Flavonoids	Flavonoid glycosides	137466
10.61_482.3234m/z	PC(15:0/0:0)	C23H48NO7P	10.6101	-1.56104	482.323	pos	M+H	24779458	RJZVWDTYEWCUAR-JOCHJYFZSA-N	CCCCCCCCCCCCCCC(=O)OC[C@H](COP(=O)([O-])OCC[N+](C)(C)C)O	5		Lipids and lipid-like molecules	Glycerophospholipids	Glycerophosphocholines	128875
0.84_160.0965m/z	Acetyl-Valine	C7H13NO3	0.840283	-2.05566	160.096	pos	M+H									127965
8.18_175.0396m/z	4-Methylumbelliferone	C10H8O3	8.18495	-2.50269	175.04	neg	M-H	5280567	HSHNITRMYYLLCV-UHFFFAOYSA-N	CC1=CC(=O)OC2=C1C=CC(=C2)O	1.9	C03081	Phenylpropanoids and polyketides	Coumarins and derivatives	Hydroxycoumarins	127107
6.81_283.0604m/z	Glycitein	C16H12O5	6.81237	-2.69205	283.06	neg	M-H	5317750	DXYUAIFZCFRPTH-UHFFFAOYSA-N	COC1=C(C=C2C(=C1)C(=O)C(=CO2)C3=CC=C(C=C3)O)O	2.4	C14536	Phenylpropanoids and polyketides	Isoflavonoids	Isoflav-2-enes	123648
5.81_397.1487m/z	[3-[2-(4-fluoroanilino)pyrimidin-4-yl]piperidin-1-yl]-(5-methylthiophen-2-yl)methanone	C21H21FN4OS	5.81235	-1.48132	397.149	pos	M+H									123028
5.23_281.1386m/z	Lactarorufin B	C15H22O5	5.22843	-3.03743	281.139	neg	M-H	182703	DBKIEMOKQWYZOA-UHFFFAOYSA-N	CC1(CC2C(C1)C(CC3=C(C2O)COC3=O)(C)O)CO	-0.5		Lipids and lipid-like molecules	Prenol lipids	Terpene lactones	120137
0.81_90.0553m/z	Alanine	C3H7NO2	0.8108	3.88351	90.0553	pos	M+H	602	QNAYBMKLOCPYGJ-UHFFFAOYSA-N	CC(C(=O)O)N	-3	C01401	Organic acids and derivatives	Carboxylic acids and derivatives	Amino acids, peptides, and analogues	119136
0.72_147.0528n	L-glutamic acid	C5H9NO4	0.717533	-2.32084	146.046	neg	M-H, M+K-2H	33032	WHUUTDBJXJRKMK-VKHMYHEASA-N	C(CC(=O)O)[C@@H](C(=O)O)N	-3.7	C00025	Organic acids and derivatives	Carboxylic acids and derivatives	Amino acids, peptides, and analogues	117920
6.11_163.0396m/z	Phenylpyruvic acid	C9H8O3	6.10918	-2.62419	163.04	neg	M-H	997	BTNMPGBKDVTSJY-UHFFFAOYSA-N	C1=CC=C(C=C1)CC(=O)C(=O)O	1.3	C00166	Benzenoids	Benzene and substituted derivatives	Phenylpyruvic acid derivatives	117735
1.34_267.0725m/z	Inosine	C10H12N4O5	1.34272	-3.79398	267.072	neg	M-H	135398641	UGQMRVRMYYASKQ-KQYNXXCUSA-N	C1=NC2=C(C(=O)N1)N=CN2[C@H]3[C@@H]([C@@H]([C@H](O3)CO)O)O	-1.3	C00294	Nucleosides, nucleotides, and analogues	Purine nucleosides		116576
10.14_474.2617m/z	PE(18:3/0:0)	C23H42NO7P	10.1425	-2.00421	474.262	neg	M-H	9547068	BBYWOYAFBUOUFP-JOCHJYFZSA-N	CCCCCCCCCCCCCCCCCC(=O)OC[C@H](COP(=O)(O)OCCN)O	3.4		Lipids and lipid-like molecules	Glycerophospholipids	Glycerophosphoethanolamines	114276
15.03_218.0154m/z	Arecoline hydrobromide	C8H14BrNO2	15.0281	-9.03877	218.015	pos	M+H-H2O									110522
11.16_452.2772m/z	PE(16:0/0:0)	C21H44NO7P	11.1572	-2.42875	452.277	neg	M-H	9547069	YVYMBNSKXOXSKW-HXUWFJFHSA-N	CCCCCCCCCCCCCCCC(=O)OC[C@H](COP(=O)(O)OCCN)O	2.4		Lipids and lipid-like molecules	Glycerophospholipids	Glycerophosphoethanolamines	108142
10.10_247.1334m/z	5,9-dihydroxy-5,7,7-trimethyl-4,5a,6,8,8a,9-hexahydro-1H-azuleno[5,6-c]furan-3-one	C15H22O4	10.0972	-1.9485	247.133	neg	M-H2O-H	156145	MWDNWQAVYQDZQI-UHFFFAOYSA-N	CC1(CC2C(C1)C(CC3=C(C2O)C(OC3=O)O)(C)O)C	0.2		Lipids and lipid-like molecules	Prenol lipids	Terpene lactones	107336
7.81_466.2194n	4-(4-benzyl-2,3-dioxopiperazin-1-yl)-N-(2,5-dimethoxyphenyl)piperidine-1-carboxamide	C25H30N4O5	7.80528	-4.81793	467.227	pos	M+H-2H2O, M+H-H2O, M+H									103931
8.67_211.1324m/z	Jasmonic acid	C12H18O3	8.67458	-2.04791	211.132	pos	M+H	5281166	ZNJFBWYDHIGLCU-HWKXXFMVSA-N	CC/C=C\C[C@@H]1[C@H](CCC1=O)CC(=O)O	1.6	C08491	Lipids and lipid-like molecules	Fatty Acyls	Lineolic acids and derivatives	102211
5.77_165.0543m/z	4-Hydroxycinnamic acid	C9H8O3	5.76893	-1.96814	165.054	pos	M+H	637542	NGSWKAQJJWESNS-ZZXKWVIFSA-N	C1=CC(=CC=C1/C=C/C(=O)O)O	1.5	C00811	Phenylpropanoids and polyketides	Cinnamic acids and derivatives	Hydroxycinnamic acids and derivatives	100991
6.55_168.1016m/z	p-Synephrine	C9H13NO2	6.54805	-2.03726	168.102	pos	M+H	7172	YRCWQPVGYLYSOX-UHFFFAOYSA-N	CNCC(C1=CC=C(C=C1)O)O	-0.6	C01869	Benzenoids	Phenols	1-hydroxy-2-unsubstituted benzenoids	99179.3
4.13_382.1712m/z	Trans-Zeatin-o-glucoside	C16H23N5O6	4.1318	-2.51039	382.171	pos	M+H	5461146	UUPDCCPAOMDMPT-HNVSNYHQSA-N	C/C(=C\CNC1=NC=NC2=C1NC=N2)/CO[C@H]3[C@@H]([C@H]([C@@H]([C@H](O3)CO)O)O)O	-0.9	C03423	Lipids and lipid-like molecules	Fatty Acyls	Fatty acyl glycosides	95749
5.50_433.1130m/z	Hemiphloin	C21H22O10	5.49628	-2.4104	433.113	neg	M-H	160711	QKPKGDDHOGIEOO-JVVVWQBKSA-N	C1[C@H](OC2=C(C1=O)C(=C(C(=C2)O)[C@H]3[C@@H]([C@H]([C@@H]([C@H](O3)CO)O)O)O)O)C4=CC=C(C=C4)O	-0.1		Phenylpropanoids and polyketides	Flavonoids	Flavonoid glycosides	95301.7
6.31_345.1465m/z	[4-(4-chlorophenyl)piperazin-1-yl]-(5,6,7,8-tetrahydroimidazo[1,2-a]pyridin-2-yl)methanone	C18H21ClN4O	6.31398	-3.29401	345.147	pos	M+H									94270.9
6.82_311.1271m/z	15,16-Dihydrotanshinone I	C18H14O3	6.81825	-2.54853	311.127	pos	M+CH3OH+H	11425923	HARGZZNYNSYSGJ-JTQLQIEISA-N	C[C@H]1COC2=C1C(=O)C(=O)C3=C2C=CC4=C(C=CC=C43)C	3.2		Lipids and lipid-like molecules	Prenol lipids	Diterpenoids	91816.4
6.60_329.0659m/z	Jaceosidin	C17H14O7	6.6025	-2.48081	329.066	neg	M-H	5379096	GLAAQZFBFGEBPS-UHFFFAOYSA-N	COC1=C(C=CC(=C1)C2=CC(=O)C3=C(O2)C=C(C(=C3O)OC)O)O	1.7		Phenylpropanoids and polyketides	Flavonoids	O-methylated flavonoids	89941.7
6.82_285.0750m/z	Genkwanin	C16H12O5	6.81825	-2.57415	285.075	pos	M+H	5281617	JPMYFOBNRRGFNO-UHFFFAOYSA-N	COC1=CC(=C2C(=C1)OC(=CC2=O)C3=CC=C(C=C3)O)O	2.1	C10046	Phenylpropanoids and polyketides	Flavonoids	O-methylated flavonoids	89805.1
1.53_252.1086m/z	Cordycepin	C10H13N5O3	1.53248	-1.95947	252.109	pos	M+H	6303	OFEZSBMBBKLLBJ-BAJZRUMYSA-N	C1[C@H](O[C@H]([C@@H]1O)N2C=NC3=C(N=CN=C32)N)CO	-1.2	C08431	Nucleosides, nucleotides, and analogues	Purine nucleosides	Purine 3'-deoxyribonucleosides	88527.6
4.31_465.1026m/z	Glucodistylin	C21H22O12	4.31108	-2.68753	465.103	neg	M-H	14187088	FVQOMEDMFUMIMO-UHFFFAOYSA-N	C1=CC(=C(C=C1C2C(C(=O)C3=C(C=C(C=C3O2)O)O)OC4C(C(C(C(O4)CO)O)O)O)O)O	-0.1		Phenylpropanoids and polyketides	Flavonoids	Flavonoid glycosides	87995.4
5.57_611.1598m/z	RUTIN	C27H30O16	5.56797	-1.3909	611.16	pos	M+H	5280805	IKGXIBQEEMLURG-NVPNHPEKSA-N	C[C@H]1[C@@H]([C@H]([C@H]([C@@H](O1)OC[C@@H]2[C@H]([C@@H]([C@H]([C@@H](O2)OC3=C(OC4=CC(=CC(=C4C3=O)O)O)C5=CC(=C(C=C5)O)O)O)O)O)O)O)O	-1.3	C05625	Phenylpropanoids and polyketides	Flavonoids	Flavonoid glycosides	85952
6.07_516.1258n	3,5-Di-O-caffeoylquinic acid	C25H24O12	6.06892	-1.89012	517.133	pos	M+H, M+Na	6474310	KRZBCHWVBQOTNZ-RDJMKVHDSA-N	C1C(C[C@H](C([C@@H]1OC(=O)/C=C/C2=CC(=C(C=C2)O)O)O)OC(=O)/C=C/C3=CC(=C(C=C3)O)O)(O)C(=O)O	1.5		Organic oxygen compounds	Organooxygen compounds	Alcohols and polyols	84343.4
5.76_301.0336m/z	Isodemethylwedelolactone	C15H8O7	5.75683	-2.21423	301.034	pos	M+H	5318547	OBEHELRBTWMPHI-UHFFFAOYSA-N	C1=C(C=C(C2=C1C3=C(C4=CC(=C(C=C4O3)O)O)C(=O)O2)O)O	2.1		Phenylpropanoids and polyketides	Isoflavonoids	Coumestans	81259
7.50_315.0503m/z	6-Methoxyluteolin	C16H12O7	7.49582	-2.19427	315.05	neg	M-H	5317284	FHHSEFRSDKWJKJ-UHFFFAOYSA-N	COC1=C(C2=C(C=C1O)OC(=CC2=O)C3=CC(=C(C=C3)O)O)O	1.4		Phenylpropanoids and polyketides	Flavonoids	O-methylated flavonoids	80378.2
6.53_160.1096n	(R)-2-Hydroxycaprylic acid	C8H16O3	6.53118	-1.97647	141.092	neg	M-H2O-H, M-H	5312860	JKRDADVRIYVCCY-SSDOTTSWSA-N	CCCCCC[C@H](C(=O)O)O	2		Lipids and lipid-like molecules	Fatty Acyls	Fatty acids and conjugates	80129
6.37_160.0400m/z	2-Indolecarboxylic acid	C9H7NO2	6.3669	-2.73444	160.04	neg	M-H	72899	HCUARRIEZVDMPT-UHFFFAOYSA-N	C1=CC=C2C(=C1)C=C(N2)C(=O)O	2.3		Organoheterocyclic compounds	Indoles and derivatives	Indolecarboxylic acids and derivatives	78526.2
7.01_138.0193m/z	2-Nitrophenol	C6H5NO3	7.00763	-2.38461	138.019	neg	M-H	6947	IQUPABOKLQSFBK-UHFFFAOYSA-N	C1=CC=C(C(=C1)[N+](=O)[O-])O	1.8	C01988	Benzenoids	Phenols	Nitrophenols	77773.4
8.16_467.2265m/z	Glu Arg Tyr	C20H30N6O7	8.15537	3.58334	467.227	pos	M+H	10181671	WVRUKYLYMFGKAN-IHRRRGAJSA-N	C1=CC(=CC=C1C[C@@H](C(=O)N[C@@H](CCC(=O)O)C(=O)N[C@@H](CCC(=O)O)C(=O)O)N)O	-4.8		Organic acids and derivatives	Carboxylic acids and derivatives	Amino acids, peptides, and analogues	72972.5
11.22_315.1932m/z	7-oxodehydroabietic acid	C20H26O3	11.2223	-7.23012	315.193	pos	M+H	29212	MSWJSDLNPCSSNW-MISYRCLQSA-N	CC(C)C1=CC2=C(C=C1)[C@]3(CCC[C@@]([C@@H]3CC2=O)(C)C(=O)O)C	4.5		Lipids and lipid-like molecules	Prenol lipids	Diterpenoids	72470.1
7.01_195.1012m/z	Methoxyeugenol	C11H14O3	7.01192	-1.69032	195.101	pos	M+H	226486	FWMPKHMKIJDEMJ-UHFFFAOYSA-N	COC1=CC(=CC(=C1O)OC)CC=C	2.6		Benzenoids	Phenols	Methoxyphenols	71332.1
7.99_339.1218m/z	Coniferyl ferulate	C20H20O6	7.99103	-2.56014	339.122	pos	M+H-H2O					C17855				71193.9
10.08_158.0729n	1-Naphthylmethanol	C11H10O	10.0821	-1.9841	141.07	pos	M+H-H2O, M+H									70488.7
10.80_359.1116m/z	Gardenin B	C19H18O7	10.8045	-2.72598	359.112	pos	M+H	96539	LXEVSYZNYDZSOB-UHFFFAOYSA-N	COC1=CC=C(C=C1)C2=CC(=O)C3=C(C(=C(C(=C3O2)OC)OC)OC)O	3.3	C15109	Phenylpropanoids and polyketides	Flavonoids	O-methylated flavonoids	70321.1
1.03_188.0560m/z	N-Acetyl-L-glutamic acid	C7H11NO5	1.02993	-2.54333	188.056	neg	M-H	70914	RFMMMVDNIPUKGG-YFKPBYRVSA-N	CC(=O)N[C@@H](CCC(=O)O)C(=O)O	-1.8	C00624	Organic acids and derivatives	Carboxylic acids and derivatives	Amino acids, peptides, and analogues	67392
0.88_208.9853m/z	Dehydroascorbic acid	C6H6O6	0.880417	-3.21876	208.985	neg	M+Cl	440667	SBJKKFFYIZUCET-JLAZNSOCSA-N	C([C@@H]([C@@H]1C(=O)C(=O)C(=O)O1)O)O	-1	C05422	Organoheterocyclic compounds	Lactones	Gamma butyrolactones	67252.9
3.81_229.1541m/z	Leu Pro	C11H20N2O3	3.81435	-2.33177	229.154	pos	M+H									66753.1
7.55_213.1127m/z	2,2'-(3-Methylcyclohexane-1,1-diyl)diacetic acid	C11H18O4	7.54962	-2.54241	213.113	neg	M-H	220370	HJPDHTDUPWGUHP-UHFFFAOYSA-N	CC1CCCC(C1)(CC(=O)O)CC(=O)O	2.1		Organic acids and derivatives	Carboxylic acids and derivatives	Dicarboxylic acids and derivatives	64184.1
5.10_190.0495m/z	Kynurenic acid	C10H7NO3	5.09542	-1.93646	190.05	pos	M+H	3845	HCZHHEIFKROPDY-UHFFFAOYSA-N	C1=CC=C2C(=C1)C(=O)C=C(N2)C(=O)O	1.3	C01717	Organoheterocyclic compounds	Quinolines and derivatives	Quinoline carboxylic acids	63791.9
9.59_177.0543m/z	Monoethyl phthalate	C10H10O4	9.5857	-1.74231	177.054	pos	M+H-H2O	75318	YWWHKOHZGJFMIE-UHFFFAOYSA-N	CCOC(=O)C1=CC=CC=C1C(=O)O	1.8		Benzenoids	Benzene and substituted derivatives	Benzoic acids and derivatives	58027.6
11.38_296.2577m/z	linolenic acid	C18H30O2	11.3811	-2.47055	296.258	pos	M+NH4	5280934	DTOSIQBPPRVQHS-PDBXOOCHSA-N	CC/C=C\C/C=C\C/C=C\CCCCCCCC(=O)O	5.9	C01595	Lipids and lipid-like molecules	Fatty Acyls	Lineolic acids and derivatives	55688.1
10.53_249.1480m/z	Atractylenolide III	C15H20O3	10.525	-1.96416	249.148	pos	M+H	155948	FBMORZZOJSDNRQ-GLQYFDAESA-N	CC1=C2C[C@H]3C(=C)CCC[C@@]3(C[C@@]2(OC1=O)O)C	2.1	C17887	Lipids and lipid-like molecules	Prenol lipids	Terpene lactones	55223.9
4.74_263.1385m/z	Phe Pro	C14H18N2O3	4.73788	-2.14883	263.138	pos	M+H	7020642	WEQJQNWXCSUVMA-RYUDHWBXSA-N	C1C[C@H](N(C1)C(=O)[C@H](CC2=CC=CC=C2)N)C(=O)O	-1.4		Organic acids and derivatives	Carboxylic acids and derivatives	Amino acids, peptides, and analogues	54641.1
0.82_112.0506m/z	Cytosine	C4H5N3O	0.821567	0.87657	112.051	pos	M+H	597	OPTASPLRGRRNAP-UHFFFAOYSA-N	C1=C(NC(=O)N=C1)N	-1.7	C00380	Organoheterocyclic compounds	Diazines	Pyrimidines and pyrimidine derivatives	52118.9
4.26_326.0993n	Melilotoside	C15H18O8	4.26128	-2.55402	325.092	neg	M-H, M+Cl	5280759	GVRIYIMNJGULCZ-ZMKUSUEASA-N	C1=CC=C(C(=C1)/C=C/C(=O)O)O[C@H]2[C@@H]([C@H]([C@@H]([C@H](O2)CO)O)O)O	-0.4		Organic oxygen compounds	Organooxygen compounds	Carbohydrates and carbohydrate conjugates	50662.7
5.89_289.1540m/z	Indole-3-acetyl-L-leucine	C16H20N2O3	5.8911	-2.4074	289.154	pos	M+H	3945661	HCZNPUHZYPPINM-UHFFFAOYSA-N	CC(C)CC(C(=O)O)NC(=O)CC1=CNC2=CC=CC=C21	2.5		Organic acids and derivatives	Carboxylic acids and derivatives	Amino acids, peptides, and analogues	50201.1
6.15_479.0813m/z	Quercetin 3-O-glucuronide	C21H18O13	6.1472	-1.49902	479.081	pos	M+H	5274585	DUBCCGAQYVUYEU-ZUGPOPFOSA-N	C1=CC(=C(C=C1C2=C(C(=O)C3=C(C=C(C=C3O2)O)O)O[C@H]4[C@@H]([C@H]([C@@H]([C@H](O4)C(=O)O)O)O)O)O)O	0.6		Phenylpropanoids and polyketides	Flavonoids	Flavonoid glycosides	50047.5
13.41_271.2271m/z	2-hydroxyhexadecanoic acid	C16H32O3	13.4103	-2.77141	271.227	neg	M-H	92836	JGHSBPIZNUXPLA-UHFFFAOYSA-N	CCCCCCCCCCCCCCC(C(=O)O)O	6.4		Lipids and lipid-like molecules	Fatty Acyls	Fatty acids and conjugates	49139.5
0.77_118.0507m/z	Threonine	C4H9NO3	0.765683	-2.41894	118.051	neg	M-H	6288	AYFVYJQAPQTCCC-GBXIJSLDSA-N	C[C@H]([C@@H](C(=O)O)N)O	-2.9	C00188	Organic acids and derivatives	Carboxylic acids and derivatives	Amino acids, peptides, and analogues	49089.2
4.43_339.0712m/z	Esculin	C15H16O9	4.4256	-2.78897	339.071	neg	M-H	5281417	XHCADAYNFIFUHF-TVKJYDDYSA-N	C1=CC(=O)OC2=CC(=C(C=C21)O[C@H]3[C@@H]([C@H]([C@@H]([C@H](O3)CO)O)O)O)O	-0.6	C09264	Phenylpropanoids and polyketides	Coumarins and derivatives	Coumarin glycosides	48812.7
1.07_211.0595m/z	7,8-Dihydroxycoumarin	C9H6O4	1.07498	-3.28826	211.06	pos	M+CH3OH+H	5280569	ATEFPOUAMCWAQS-UHFFFAOYSA-N	C1=CC(=C(C2=C1C=CC(=O)O2)O)O	1.2	C03093	Phenylpropanoids and polyketides	Coumarins and derivatives	Hydroxycoumarins	48730.8
12.78_169.0140m/z	Gallic acid	C7H6O5	12.776	-1.45982	169.014	neg	M-H	370	LNTHITQWFMADLM-UHFFFAOYSA-N	C1=C(C=C(C(=C1O)O)O)C(=O)O	0.7	C01424	Benzenoids	Benzene and substituted derivatives	Benzoic acids and derivatives	48512.9
7.27_303.0491m/z	Tricetin	C15H10O7	7.27465	-2.59982	303.049	pos	M+H	5281701	ARSRJFRKVXALTF-UHFFFAOYSA-N	C1=C(C=C(C(=C1O)O)O)C2=CC(=O)C3=C(C=C(C=C3O2)O)O	1	C10192	Phenylpropanoids and polyketides	Flavonoids	Flavones	46932.2
8.55_257.0814m/z	2',4',6'-Trihydroxydihydrochalcone	C15H14O4	8.55238	-2.17529	257.081	neg	M-H	1226045	QWQGMMRHTWIOGH-UHFFFAOYSA-N	C1=CC=C(C=C1)CCC(=O)C2=C(C=C(C=C2O)O)O	3	C09618	Phenylpropanoids and polyketides	Linear 1,3-diarylpropanoids	Chalcones and dihydrochalcones	45803
5.71_303.1331m/z	(5R)-trans-1,7-diphenyl-5-hydroxy-6-hepten-3-one	C19H20O2	5.71025	-8.57766	303.133	pos	M+Na	13347321	NEQGOKAKPXXESR-ACCUITESSA-N	C1=CC=C(C=C1)CCC(=O)CC(/C=C/C2=CC=CC=C2)O	3.3		Phenylpropanoids and polyketides	Diarylheptanoids	Linear diarylheptanoids	45677.8
7.35_359.0765m/z	Jaceidin	C18H16O8	7.3489	-2.0693	359.076	neg	M-H	5464461	XUWTZJRCCPNNJR-UHFFFAOYSA-N	COC1=C(C=CC(=C1)C2=C(C(=O)C3=C(O2)C=C(C(=C3O)OC)O)OC)O	2.8		Phenylpropanoids and polyketides	Flavonoids	O-methylated flavonoids	44811.9
0.71_132.0299m/z	L-aspartic acid	C4H7NO4	0.706783	-2.2517	132.03	neg	M-H	5960	CKLJMWTZIZZHCS-REOHCLBHSA-N	C([C@@H](C(=O)O)N)C(=O)O	-2.8	C00049	Organic acids and derivatives	Carboxylic acids and derivatives	Amino acids, peptides, and analogues	43970.8
14.79_192.1378m/z	N-Ethyl-N-Methylcathinone	C12H17NO	14.7949	-2.41443	192.138	pos	M+H	43794825	LOQPFJRCXJZNQV-UHFFFAOYSA-N	CCN(C)C(C)C(=O)C1=CC=CC=C1	2.4		Organic oxygen compounds	Organooxygen compounds	Carbonyl compounds	43689.1
6.35_147.0449m/z	3-Isochromanone	C9H8O2	6.35462	-2.03498	147.045	neg	M-H					C07728				43343.5
6.30_461.0717m/z	Kaempferol 3-glucuronoside	C21H18O12	6.30258	-1.88778	461.072	neg	M-H	22846027	FNTJVYCFNVUBOL-MBIBTLSJSA-N	C1=CC(=CC=C1C2=C(C(=O)C3=C(C=C(C=C3O2)O)O)OC4[C@@H]([C@H]([C@@H]([C@H](O4)C(=O)O)O)O)O)O	1		Phenylpropanoids and polyketides	Flavonoids	Flavonoid glycosides	43291.9
3.18_149.0240m/z	3-Hydroxymandelic acid	C8H8O4	3.18133	-2.53531	149.024	neg	M-H2O-H	86957	OLSDAJRAVOVKLG-UHFFFAOYSA-N	C1=CC(=CC(=C1)O)C(C(=O)O)O	-0.1	C11527	Benzenoids	Phenols	1-hydroxy-4-unsubstituted benzenoids	42288.2
5.56_434.1206n	Naringenin 5-O-beta-D-glucopyranoside	C21H22O10	5.55783	-1.50029	435.128	pos	M+H-H2O, M+H	3083618	MFQIWHVVFBCURA-KYSZGLPYSA-N	C1[C@@H](OC2=C(C1=O)C(=CC(=C2)O)O[C@H]3[C@@H]([C@H]([C@@H]([C@H](O3)CO)O)O)O)C4=CC=C(C=C4)O	0		Phenylpropanoids and polyketides	Flavonoids	Flavonoid glycosides	39996.4
8.37_221.1895m/z	Caryophyllene epoxide	C15H24O	8.3666	-2.23875	221.189	pos	M+H	14350	NVEQFIOZRFFVFW-UHFFFAOYSA-N	CC1(CC2C1CCC3(C(O3)CCC2=C)C)C	3.6	C16908	Lipids and lipid-like molecules	Prenol lipids	Sesquiterpenoids	38378.2
8.85_201.1634m/z	Alpha-Calacorene	C15H20	8.84733	-1.94323	201.163	pos	M+H	12302243	CUUMXRBKJIDIAY-ZDUSSCGKSA-N	CC1=CC[C@H](C2=C1C=CC(=C2)C)C(C)C	4.4		Lipids and lipid-like molecules	Prenol lipids	Sesquiterpenoids	36845.5
14.87_175.1186m/z	L-Arginine	C6H14N4O2	14.8731	-1.82563	175.119	pos	M+H	6322	ODKSFYDXXFIFQN-BYPYZUCNSA-N	C(C[C@@H](C(=O)O)N)CN=C(N)N	-4.2	C00062	Organic acids and derivatives	Carboxylic acids and derivatives	Amino acids, peptides, and analogues	36763.2
6.59_245.1379m/z	9-(2,3-Dihydroxypropoxy)-9-oxononanoic acid	C12H22O6	6.59313	-1.74935	245.138	pos	M+H-H2O	45783154	BQRISQXLSXCXSC-UHFFFAOYSA-N	C(CCCC(=O)O)CCCC(=O)OCC(CO)O	0.8		Lipids and lipid-like molecules	Fatty Acyls	Fatty acids and conjugates	36701.8
1.90_346.0539m/z	3',5'-cyclic GMP	C10H12N5O7P	1.90113	-2.3812	346.054	pos	M+H	135398570	ZOOGRGPOEVQQDX-UUOKFMHZSA-N	C1[C@@H]2[C@H]([C@H]([C@@H](O2)N3C=NC4=C3N=C(NC4=O)N)O)OP(=O)(O1)O	-3.4	C00942	Nucleosides, nucleotides, and analogues	Purine nucleotides	Cyclic purine nucleotides	36165.2
10.39_263.2363m/z	Farnesyl acetone	C18H30O	10.3907	-2.33539	263.236	pos	M+H	1711945	LTUMRKDLVGQMJU-IUBLYSDUSA-N	CC(=CCC/C(=C/CC/C(=C/CCC(=O)C)/C)/C)C	5.6		Lipids and lipid-like molecules	Prenol lipids	Diterpenoids	35725.3
6.15_301.0336m/z	myricetin	C15H10O8	6.1472	-2.10564	301.034	pos	M+H-H2O	5281672	IKMDFBPHZNJCSN-UHFFFAOYSA-N	C1=C(C=C(C(=C1O)O)O)C2=C(C(=O)C3=C(C=C(C=C3O2)O)O)O	1.2	C10107	Phenylpropanoids and polyketides	Flavonoids	Flavones	35724.2
1.92_298.1138m/z	3'-O-Methylguanosine	C11H15N5O5	1.92273	-2.67994	298.114	pos	M+H	135742509	UYARPHAXAJAZLU-KQYNXXCUSA-N	CO[C@@H]1[C@H](O[C@H]([C@@H]1O)N2C=NC3=C2N=C(NC3=O)N)CO	-1.9		Nucleosides, nucleotides, and analogues	Purine nucleosides		34692.9
7.32_492.2431m/z	N-cyclohexyl-4-[4-(1,2-dihydroacenaphthylen-3-ylsulfonyl)piperazin-1-yl]-6-methylpyrimidin-2-amine	C27H33N5O2S	7.32263	0.693174	492.243	pos	M+H									33885.2
4.60_360.2119m/z	Leu Glu Val	C16H29N3O6	4.6033	-2.85705	360.212	pos	M+H	145456420	HVJVUYQWFYMGJS-GVXVVHGQSA-N	CC(C)C[C@@H](C(=O)N[C@@H](CCC(=O)O)C(=O)N[C@@H](C(C)C)C(=O)O)N	-3.4		Organic acids and derivatives	Carboxylic acids and derivatives	Amino acids, peptides, and analogues	33740.2
1.54_293.0540m/z	1-Methylpseudouridine	C10H14N2O6	1.5421	-2.32785	293.054	neg	M+Cl	99543	UVBYMVOUBXYSFV-XUTVFYLZSA-N	CN1C=C(C(=O)NC1=O)[C@H]2[C@@H]([C@@H]([C@H](O2)CO)O)O	-2.6		Nucleosides, nucleotides, and analogues	Nucleoside and nucleotide analogues		33438.1
7.92_137.1322m/z	beta-Myrcene	C10H16	7.92032	-2.11185	137.132	pos	M+H	31253	UAHWPYUMFXYFJY-UHFFFAOYSA-N	CC(=CCCC(=C)C=C)C	4.3	C06074	Lipids and lipid-like molecules	Prenol lipids	Monoterpenoids	31753.3
6.74_238.1928n	4(15)-Selinene-11,12-diol	C15H26O2	6.74138	-2.00886	221.19	pos	M+H-H2O, M+H									30796
9.80_299.1998m/z	14-Deoxyandrographolide	C20H30O4	9.79925	-2.21486	299.2	pos	M+H-2H2O	11624161	GVRNTWSGBWPJGS-YSDSKTICSA-N	C[C@@]12CC[C@H]([C@@]([C@H]1CCC(=C)[C@H]2CCC3=CCOC3=O)(C)CO)O	3.4		Lipids and lipid-like molecules	Prenol lipids	Terpene lactones	28208.2
5.45_275.1383m/z	IAA-Val	C15H18N2O3	5.44825	-2.58177	275.138	pos	M+H	446641	AZEGJHGXTSUPPG-AWEZNQCLSA-N	CC(C)[C@@H](C(=O)O)NC(=O)CC1=CNC2=CC=CC=C21	2.1		Organic acids and derivatives	Carboxylic acids and derivatives	Amino acids, peptides, and analogues	27669.3
4.38_222.0764m/z	Acetyl-Tyrosine	C11H13NO4	4.37607	-3.4315	222.076	neg	M-H	68310	CAHKINHBCWCHCF-JTQLQIEISA-N	CC(=O)N[C@@H](CC1=CC=C(C=C1)O)C(=O)O	-0.2		Organic acids and derivatives	Carboxylic acids and derivatives	Amino acids, peptides, and analogues	26901.3
10.95_313.2376m/z	9,10-Dihydroxy-12Z-octadecenoic acid	C18H34O4	10.9524	-2.53894	313.238	neg	M-H	9966640	XEBKSQSGNGRGDW-YFHOEESVSA-N	CCCCC/C=C\CC(C(CCCCCCCC(=O)O)O)O	4.6		Lipids and lipid-like molecules	Fatty Acyls	Fatty acids and conjugates	26059.7
6.33_291.0968m/z	Malonyltryptophan	C14H14N2O5	6.32682	-2.50433	291.097	pos	M+H	5199636	OVEAWSPZRGBTSS-UHFFFAOYSA-N	C1=CC=C2C(=C1)C(=CN2)CC(C(=O)O)NC(=O)CC(=O)O	0.3		Organic acids and derivatives	Carboxylic acids and derivatives	Amino acids, peptides, and analogues	25893.4
11.60_365.2678m/z	1a,1b-dihomo PGF2Alpha	C22H38O5	11.6036	-2.24441	365.268	pos	M+H-H2O	6443812	ZCTAOAWRUXSOQF-GWSKAPOCSA-N	CCCCC[C@@H](/C=C/[C@H]1[C@@H](C[C@@H]([C@@H]1C/C=C\CCCCCC(=O)O)O)O)O	3.8		Lipids and lipid-like molecules	Fatty Acyls	Eicosanoids	25884.3
8.57_309.2064m/z	9S-Hydroperoxy-10E,12Z,15Z-octadecatrienoic acid	C18H30O4	8.57472	-2.47921	309.206	neg	M-H	6450029	RWKJTIHNYSIIHW-MEBVTJQTSA-N	CC/C=C\C/C=C\C=C\[C@H](CCCCCCCC(=O)O)OO	4.7		Lipids and lipid-like molecules	Fatty Acyls	Lineolic acids and derivatives	23049.1
4.32_295.1646m/z	Tyr Leu	C15H22N2O4	4.3232	-2.02224	295.165	pos	M+H	4466134	AUEJLPRZGVVDNU-UHFFFAOYSA-N	CC(C)CC(C(=O)O)NC(=O)C(CC1=CC=C(C=C1)O)N	-1.8		Organic acids and derivatives	Carboxylic acids and derivatives	Amino acids, peptides, and analogues	21206.9
5.47_449.1073m/z	Luteolin 4'-glucoside	C21H20O11	5.46925	-1.19107	449.107	pos	M+H	12304737	UHNXUSWGOJMEFO-UHFFFAOYSA-N	C1=CC(=C(C=C1C2=CC(=O)C3=C(C=C(C=C3O2)O)O)O)OC4C(C(C(C(O4)CO)O)O)O	0.5		Phenylpropanoids and polyketides	Flavonoids	Flavonoid glycosides	20641.4
5.72_927.1822m/z	Quercetin-3-O-glucoside	C21H20O12	5.7212	-1.56426	927.182	neg	2M-H	22630387	RPVIQWDFJPYNJM-UHFFFAOYSA-N	C1=CC(=C(C=C1C2=C(C(=O)C3=C(C=C(C=C3O2)O)O)OC4C(C(C(C(O4)CO)O)O)O)O)OC5C(C(C(C(O5)CO)O)O)O	-1.4	C05623	Phenylpropanoids and polyketides	Flavonoids	Flavonoid glycosides	20500.5
2.36_122.0964m/z	Phenethylamine	C8H11N	2.36202	-0.248526	122.096	pos	M+H					C05332				19929.4
8.80_218.9616m/z	2,4-Dichlorophenoxyacetic acid	C8H6Cl2O3	8.80318	-2.51552	218.962	neg	M-H	1486	OVSKIKFHRZPJSS-UHFFFAOYSA-N	C1=CC(=C(C=C1Cl)Cl)OCC(=O)O	2.8	C03664	Benzenoids	Benzene and substituted derivatives	Phenoxyacetic acid derivatives	19562.2
4.46_318.2016m/z	Ser Val Leu	C14H27N3O5	4.45763	-2.31123	318.202	pos	M+H	145457935	YEDSOSIKVUMIJE-DCAQKATOSA-N	CC(C)C[C@@H](C(=O)O)NC(=O)[C@H](C(C)C)NC(=O)[C@H](CO)N	-2.3		Organic acids and derivatives	Carboxylic acids and derivatives	Amino acids, peptides, and analogues	18297.9
3.60_312.1295m/z	N2,N2-Dimethylguanosine	C12H17N5O5	3.60143	-2.51607	312.129	pos	M+H	135501639	RSPURTUNRHNVGF-IOSLPCCCSA-N	CN(C)C1=NC2=C(C(=O)N1)N=CN2[C@H]3[C@@H]([C@@H]([C@H](O3)CO)O)O	-1.3		Nucleosides, nucleotides, and analogues	Purine nucleosides		17463.6
6.75_353.1827n	4-(butan-2-yl)phenyl 2-(acetylamino)-2-deoxy-beta-D-glucopyranoside	C18H27NO6	6.75292	-3.1243	354.19	pos	M+H-H2O, M+H	16398230	NZLBBWKRFWAHOK-NTCFCCFRSA-N	CCC(C)C1=CC=C(C=C1)O[C@H]2[C@@H]([C@H]([C@@H]([C@H](O2)CO)O)O)NC(=O)C	1.8		Organic oxygen compounds	Organooxygen compounds	Carbohydrates and carbohydrate conjugates	17017.6
5.17_244.0878n	biotin	C10H16N2O3S	5.16785	-1.49061	245.095	pos	M+H-H2O, M+H	171548	YBJHBAHKTGYVGT-ZKWXMUAHSA-N	C1[C@H]2[C@@H]([C@@H](S1)CCCCC(=O)O)NC(=O)N2	0.3	C00120	Organoheterocyclic compounds	Biotin and derivatives		16753.3
6.14_247.1071m/z	N-Acetyl-tryptophan	C13H14N2O3	6.13697	-2.39291	247.107	pos	M+H	700653	DZTHIGRZJZPRDV-LBPRGKRZSA-N	CC(=O)N[C@@H](CC1=CNC2=CC=CC=C21)C(=O)O	1.1	C03137	Organic acids and derivatives	Carboxylic acids and derivatives	Amino acids, peptides, and analogues	16639
5.16_344.2535m/z	Leu Val Leu	C17H33N3O4	5.1575	-2.49802	344.254	pos	M+H	11515702	FPPCCQGECVKLDY-IHRRRGAJSA-N	CC(C)C[C@@H](C(=O)N[C@@H](C(C)C)C(=O)N[C@@H](CC(C)C)C(=O)O)N	-1.6		Organic acids and derivatives	Carboxylic acids and derivatives	Amino acids, peptides, and analogues	16452.9
8.00_317.0648m/z	Isorhamnetin	C16H12O7	8.00352	-2.45512	317.065	pos	M+H	5281654	IZQSVPBOUDKVDZ-UHFFFAOYSA-N	COC1=C(C=CC(=C1)C2=C(C(=O)C3=C(C=C(C=C3O2)O)O)O)O	1.9	C10084	Phenylpropanoids and polyketides	Flavonoids	Flavones	16399.1
14.78_311.1256m/z	Cl-Amidine	C14H19ClN4O2	14.7823	-4.40048	311.126	pos	M+H					C06060				16233.9
7.83_303.1595m/z	2,6-dihydroxy-7-methoxy-1,1,4a-trimethyl-3,4,10,10a-tetrahydro-2H-phenanthren-9-one	C18H24O4	7.83223	-2.40858	303.159	neg	M-H									16218.8
5.19_243.1333m/z	Glutamylleucine	C11H20N2O5	5.19045	-2.37703	243.133	pos	M+H-H2O	9856500	YBAFDPFAUTYYRW-YUMQZZPRSA-N	CC(C)C[C@@H](C(=O)O)NC(=O)[C@H](CCC(=O)O)N	-3.3		Organic acids and derivatives	Carboxylic acids and derivatives	Amino acids, peptides, and analogues	16045.7
11.77_365.2677m/z	16,16-dimethyl-PGE1	C22H38O5	11.7668	-2.37795	365.268	pos	M+H-H2O	5283058	RQOFITYRYPQNLL-ZWSAOQBFSA-N	CCCCC(C)(C)[C@@H](/C=C/[C@H]1[C@@H](CC(=O)[C@@H]1CCCCCCC(=O)O)O)O	4		Lipids and lipid-like molecules	Fatty Acyls	Eicosanoids	15799.3
8.26_423.1289m/z	Campestrinoside	C20H24O10	8.25885	-1.79317	423.129	neg	M-H									14545.9
8.93_255.1584m/z	Gliocladic acid	C14H22O4	8.92902	-2.56588	255.158	pos	M+H	6439616	SLVSUVFUFJKMCV-MZGZCWAVSA-N	CC(C)[C@@H]1CCC(=C[C@H]1/C=C(\CO)/C(=O)O)CO	1.1		Lipids and lipid-like molecules	Prenol lipids	Monoterpenoids	13666.9
4.78_330.2379m/z	Leu Val Val	C16H31N3O4	4.78375	-2.51762	330.238	pos	M+H	11559237	FTKXYXACXYOHND-XUXIUFHCSA-N	CC[C@H](C)[C@@H](C(=O)N[C@@H](CC(C)C)C(=O)O)NC(=O)[C@H](C(C)C)N	0		Organic acids and derivatives	Carboxylic acids and derivatives	Amino acids, peptides, and analogues	13296
9.67_193.0492m/z	scopoletin	C10H8O4	9.66895	-1.72739	193.049	pos	M+H	5280460	RODXRVNMMDRFIK-UHFFFAOYSA-N	COC1=C(C=C2C(=C1)C=CC(=O)O2)O	1.5	C01752	Phenylpropanoids and polyketides	Coumarins and derivatives	Hydroxycoumarins	13290.4
5.47_287.0543m/z	kaempferol	C15H10O6	5.46925	-2.38164	287.054	pos	M+H	5280863	IYRMWMYZSQPJKC-UHFFFAOYSA-N	C1=CC(=CC=C1C2=C(C(=O)C3=C(C=C(C=C3O2)O)O)O)O	1.9	C05903	Phenylpropanoids and polyketides	Flavonoids	Flavones	12849.9
10.77_277.2163m/z	13-Hydroxy-9Z,11E-octadecadienoic acid	C18H32O3	10.7738	-3.32933	277.216	neg	M-H2O-H	5282947	HNICUWMFWZBIFP-BSZOFBHHSA-N	CCCCCC(/C=C/C=C\CCCCCCCC(=O)O)O	5.3	C04056	Lipids and lipid-like molecules	Fatty Acyls	Lineolic acids and derivatives	12198.1
4.67_225.0864m/z	Hydroxykynurenine	C10H12N2O4	4.6731	-2.47593	225.086	pos	M+H	89	VCKPUUFAIGNJHC-UHFFFAOYSA-N	C1=CC(=C(C(=C1)O)N)C(=O)CC(C(=O)O)N	-2.5	C02794	Organic oxygen compounds	Organooxygen compounds	Carbonyl compounds	11677.3
10.60_451.2832m/z	Celastrol	C29H38O4	10.5979	-2.32685	451.283	pos	M+H	122724	KQJSQWZMSAGSHN-JJWQIEBTSA-N	CC1=C(C(=O)C=C2C1=CC=C3[C@]2(CC[C@@]4([C@@]3(CC[C@@]5([C@H]4C[C@](CC5)(C)C(=O)O)C)C)C)C)O	5.9		Lipids and lipid-like molecules	Prenol lipids	Triterpenoids	11253.6
1.69_260.1599m/z	Gln Ile	C11H21N3O4	1.69367	-2.35077	260.16	pos	M+H	7020102	CNPNWGHRMBQHBZ-ZKWXMUAHSA-N	CC[C@H](C)[C@@H](C(=O)N[C@@H](CCC(=O)N)C(=O)O)N	-4.2		Organic acids and derivatives	Carboxylic acids and derivatives	Amino acids, peptides, and analogues	11230
4.34_359.2279m/z	Gln Val Leu	C16H30N4O5	4.34452	-2.64717	359.228	pos	M+H	145455275	VEYGCDYMOXHJLS-GVXVVHGQSA-N	CC(C)C[C@@H](C(=O)O)NC(=O)[C@H](C(C)C)NC(=O)[C@H](CCC(=O)N)N	-4.1		Organic acids and derivatives	Carboxylic acids and derivatives	Amino acids, peptides, and analogues	11153.6
2.63_223.1073m/z	Gly Phe	C11H14N2O3	2.62638	-2.08951	223.107	pos	M+H	6992304	GLUBLISJVJFHQS-VIFPVBQESA-N	C1=CC=C(C=C1)C[C@@H](C(=O)NCC(=O)O)N	-2.5		Organic acids and derivatives	Carboxylic acids and derivatives	Amino acids, peptides, and analogues	10985.5
7.49_317.0649m/z	3-O-Methylquercetin	C16H12O7	7.48722	-2.24022	317.065	pos	M+H	5280681	WEPBGSIAWZTEJR-UHFFFAOYSA-N	COC1=C(OC2=CC(=CC(=C2C1=O)O)O)C3=CC(=C(C=C3)O)O	2.5	C04443	Phenylpropanoids and polyketides	Flavonoids	O-methylated flavonoids	10913.5
4.87_346.1964m/z	Asp Val Leu	C15H27N3O6	4.87192	-2.39953	346.196	pos	M+H	145454616	GIKOVDMXBAFXDF-NHCYSSNCSA-N	CC(C)C[C@@H](C(=O)O)NC(=O)[C@H](C(C)C)NC(=O)[C@H](CC(=O)O)N	-3.8		Organic acids and derivatives	Carboxylic acids and derivatives	Amino acids, peptides, and analogues	10752.6
4.40_345.2125m/z	Val Asn Ile	C15H28N4O5	4.40257	-2.21376	345.212	pos	M+H	145458953	VHRLUTIMTDOVCG-PEDHHIEDSA-N	CC[C@H](C)[C@@H](C(=O)N[C@@H]([C@@H](C)CC)C(=O)O)NC(=O)[C@H](C(C)C)N	-2.1		Organic acids and derivatives	Carboxylic acids and derivatives	Amino acids, peptides, and analogues	10379.1
5.18_325.0911m/z	Skimmin	C15H16O8	5.17893	-1.99345	325.091	pos	M+H	99693	VPAOSFFTKWUGAD-TVKJYDDYSA-N	C1=CC(=CC2=C1C=CC(=O)O2)O[C@H]3[C@@H]([C@H]([C@@H]([C@H](O3)CO)O)O)O	-0.7		Phenylpropanoids and polyketides	Coumarins and derivatives	Coumarin glycosides	10270.7
4.66_182.0455m/z	4-Pyridoxic acid	C8H9NO4	4.65563	-2.28415	182.045	neg	M-H	6723	HXACOUQIXZGNBF-UHFFFAOYSA-N	CC1=NC=C(C(=C1O)C(=O)O)CO	0.1	C00847	Organoheterocyclic compounds	Pyridines and derivatives	Pyridinecarboxylic acids and derivatives	9368.03
1.89_207.1125m/z	(S)-alpha-Amino-beta-phenylpropionicacid	C9H11NO2	1.89043	-1.71084	207.113	pos	M+ACN+H					C00079				9268.85
4.41_332.2172m/z	Val Thr Leu	C15H29N3O5	4.41345	-2.37852	332.217	pos	M+H	101986938	LCHZBEUVGAVMKS-RHYQMDGZSA-N	C[C@H]([C@@H](C(=O)N[C@@H](CC(C)C)C(=O)O)NC(=O)[C@H](C(C)C)N)O	-2		Organic acids and derivatives	Carboxylic acids and derivatives	Amino acids, peptides, and analogues	8687.42
7.99_315.0504m/z	Rhamnetin	C16H12O7	7.99383	-1.89989	315.05	neg	M-H	5281691	JGUZGNYPMHHYRK-UHFFFAOYSA-N	COC1=CC(=C2C(=C1)OC(=C(C2=O)O)C3=CC(=C(C=C3)O)O)O	1.9	C10176	Phenylpropanoids and polyketides	Flavonoids	Flavones	8562.58
3.97_280.1053n	Asp Phe	C13H16N2O5	3.96703	-2.28402	281.113	pos	M+H, M+Na									8560.63
6.43_323.1382m/z	Indole-3-acetyl-L-phenylalanine	C19H18N2O3	6.42505	-2.58382	323.138	pos	M+H	644227	BUGQHORRADGONS-KRWDZBQOSA-N	C1=CC=C(C=C1)C[C@@H](C(=O)O)NC(=O)CC2=CNC3=CC=CC=C32	2		Organic acids and derivatives	Carboxylic acids and derivatives	Amino acids, peptides, and analogues	8281.19
4.94_359.2279m/z	Ile Asn Ile	C16H30N4O5	4.9398	-2.7189	359.228	pos	M+H	145457149	KIEPQOIQHFKQLK-PCBIJLKTSA-N	CC[C@H](C)[C@@H](C(=O)O)NC(=O)[C@H](CC(=O)N)NC(=O)[C@H](CC1=CC=CC=C1)N	-2.9		Organic acids and derivatives	Carboxylic acids and derivatives	Amino acids, peptides, and analogues	8094.01
5.53_360.2119m/z	Asp Ile Ile	C16H29N3O6	5.5345	-2.68238	360.212	pos	M+H	145454467	NHSDEZURHWEZPN-SXTJYALSSA-N	CC[C@H](C)[C@@H](C(=O)N[C@@H]([C@@H](C)CC)C(=O)O)NC(=O)[C@H](CC(=O)O)N	-3.3		Organic acids and derivatives	Carboxylic acids and derivatives	Amino acids, peptides, and analogues	7509.54
4.47_160.1329m/z	DL-2-Aminooctanoic acid	C8H17NO2	4.46777	-1.66601	160.133	pos	M+H	69522	AKVBCGQVQXPRLD-UHFFFAOYSA-N	CCCCCCC(C(=O)O)N	-0.5		Organic acids and derivatives	Carboxylic acids and derivatives	Amino acids, peptides, and analogues	6290.38
5.47_610.1523n	Kaempferol 3-O-gentiobioside	C27H30O16	5.46925	-1.75775	611.16	pos	M+H, M+Na	9960512	BITPRCODIALMOV-DEFKTLOSSA-N	C1=CC(=CC=C1C2=C(C(=O)C3=C(C=C(C=C3O2)O)O)O[C@H]4[C@@H]([C@H]([C@@H]([C@H](O4)CO[C@H]5[C@@H]([C@H]([C@@H]([C@H](O5)CO)O)O)O)O)O)O)O	-1.4		Phenylpropanoids and polyketides	Flavonoids	Flavonoid glycosides	6076.17
16.64_99.0449m/z	Tiglic acid	C5H8O2	16.6389	-2.16172	99.0449	neg	M-H	125468	UIERETOOQGIECD-ONEGZZNKSA-N	C/C=C(\C)/C(=O)O	1	C08279	Lipids and lipid-like molecules	Fatty Acyls	Fatty acids and conjugates	5892.97
5.27_289.1176m/z	Honokiol	C18H18O2	5.2673	-8.56735	289.118	pos	M+Na	72303	FVYXIJYOAGAUQK-UHFFFAOYSA-N	C=CCC1=CC(=C(C=C1)O)C2=CC(=C(C=C2)O)CC=C	5	C10630	Benzenoids	Benzene and substituted derivatives	Biphenyls and derivatives	5111.32
3.55_294.1209n	Glu Phe	C14H18N2O5	3.55045	-2.26396	295.128	pos	M+H-H2O, M+H	19365626	XMBSYZWANAQXEV-UHFFFAOYSA-N	C1=CC=C(C=C1)CC(C(=O)O)NC(=O)C(CCC(=O)O)N	-3	C01425	Organic acids and derivatives	Carboxylic acids and derivatives	Amino acids, peptides, and analogues	4534.25
2.93_295.1646m/z	Ile Tyr	C15H22N2O4	2.93335	-2.26329	295.165	pos	M+H	7408195	MUFXDFWAJSPHIQ-XDTLVQLUSA-N	CC[C@H](C)[C@@H](C(=O)N[C@@H](CC1=CC=C(C=C1)O)C(=O)O)N	-2.2		Organic acids and derivatives	Carboxylic acids and derivatives	Amino acids, peptides, and analogues	4361
5.10_581.1490m/z	4-(3,4-Dihydroxyphenyl)-7-hydroxy-2-oxo-2H-chromen-5-yl 6-O-D-xylopyranosyl-beta-D-glucopyranoside	C26H28O15	5.09542	-1.84828	581.149	pos	M+H									4227.51
5.69_507.1123m/z	Quercetin 3-(6-O-acetyl-beta-glucoside)	C23H22O13	5.68698	-2.0337	507.112	pos	M+H	10006384	IGLUNMMNDNWZOA-LNNZMUSMSA-N	CC(=O)OC[C@@H]1[C@H]([C@@H]([C@H]([C@@H](O1)OC2=C(OC3=CC(=CC(=C3C2=O)O)O)C4=CC(=C(C=C4)O)O)O)O)O	0.4		Phenylpropanoids and polyketides	Flavonoids	Flavonoid glycosides	4218.71
5.14_427.1590m/z	N-methyl-N-(2-(pyridin-2-yl)ethyl)-2-(2,3,5-trimethyl-7-oxo-7H-furo[3,2-g]chromen-6-yl)acetamide	C24H24N2O4	5.13593	-9.58635	427.159	pos	M+Na									3846.23
5.01_491.1175m/z	Cyanidin 3-(6''-acetylglucoside)	C23H22O12	5.00887	-1.78009	491.118	pos	M+H									2991.77
12.48_205.1947m/z	gamma-Cadinene	C15H24	12.4766	-2.08135	205.195	pos	M+H	92313	WRHGORWNJGOVQY-RBSFLKMASA-N	CC1=C[C@H]2[C@H](CC1)C(=C)CC[C@@H]2C(C)C	4.3	C19738	Lipids and lipid-like molecules	Prenol lipids	Sesquiterpenoids	2821.23
5.40_378.2378m/z	Val Leu Phe	C20H31N3O4	5.4035	-2.39486	378.238	pos	M+H	101750924	ZZGPVSZDZQRJQY-ULQDDVLXSA-N	CC(C)C[C@@H](C(=O)N[C@@H](CC1=CC=CC=C1)C(=O)O)NC(=O)[C@H](C(C)C)N	-1.3		Organic acids and derivatives	Carboxylic acids and derivatives	Amino acids, peptides, and analogues	2424.25
6.39_424.1271m/z	1-(4-oxo-4h-chromen-3-yl)-2,3,4,9-tetrahydro-1h-beta-carboline-3-carboxylic acid	C21H16N2O4	6.39213	0.994421	424.127	pos	M+ACN+Na									2337.82
8.13_333.2063m/z	5(S)-HpEPE	C20H30O4	8.13115	-2.5685	333.206	neg	M-H	5283184	NKXYOIJDQPQELO-GHWNLOBHSA-N	CC/C=C\C/C=C\C/C=C\C/C=C\C=C\[C@H](CCCC(=O)O)OO	4.6		Lipids and lipid-like molecules	Fatty Acyls	Eicosanoids	2323.92
1.79_201.1240m/z	Alanylisoleucine	C9H18N2O3	1.78603	-2.51522	201.124	neg	M-H									1048.76
4.78_148.9522m/z	Trifluoromethanesulfonic acid	CHF3O3S	4.78298	-2.68289	148.952	neg	M-H									710.115
6.66_439.2294m/z	Thr Arg Tyr	C19H30N6O6	6.6587	-1.18485	439.229	pos	M+H									0
5.05_410.1912m/z	Tyr Asp Ile	C19H27N3O7	5.05055	-2.3766	410.191	pos	M+H	145454476	RTXQQDVBACBSCW-CFMVVWHZSA-N	CC[C@H](C)[C@@H](C(=O)N[C@@H](CC1=CC=C(C=C1)O)C(=O)O)NC(=O)[C@H](CC(=O)O)N	-2.9		Organic acids and derivatives	Carboxylic acids and derivatives	Amino acids, peptides, and analogues	0
4.27_346.2329m/z	Ile Leu Thr	C16H31N3O5	4.26653	-2.23864	346.233	pos	M+H	145456197	PHRWFSFCNJPWRO-PPCPHDFISA-N	CC[C@H](C)[C@@H](C(=O)N[C@@H](CC(C)C)C(=O)N[C@@H]([C@@H](C)O)C(=O)O)N	-2.1		Organic acids and derivatives	Carboxylic acids and derivatives	Amino acids, peptides, and analogues	0
3.73_318.2016m/z	Ser Leu Val	C14H27N3O5	3.72937	-2.29113	318.202	pos	M+H	101769071	IXZHZUGGKLRHJD-DCAQKATOSA-N	CC(C)C[C@@H](C(=O)N[C@@H](C(C)C)C(=O)O)NC(=O)[C@H](CO)N	-2.3		Organic acids and derivatives	Carboxylic acids and derivatives	Amino acids, peptides, and analogues	0
5.23_626.1471n	Quercetin-3,4'-O-di-beta-glucoside	C27H30O17	5.22565	-1.89696	627.154	pos	M+H, M+Na	22630387	RPVIQWDFJPYNJM-UHFFFAOYSA-N	C1=CC(=C(C=C1C2=C(C(=O)C3=C(C=C(C=C3O2)O)O)OC4C(C(C(C(O4)CO)O)O)O)O)OC5C(C(C(C(O5)CO)O)O)O	-1.4	C05623	Phenylpropanoids and polyketides	Flavonoids	Flavonoid glycosides	0
4.59_341.1376m/z	Clemaphenol A	C20H22O6	4.59303	-2.12413	341.138	pos	M+H-H2O	46173999	VRHZMFGDDGFRLP-AFHBHXEDSA-N	COC1=C(C=C(C=C1)[C@@H]2[C@H]3CO[C@@H]([C@H]3CO2)C4=CC(=C(C=C4)OC)O)O	2.3	C17808	Lignans, neolignans and related compounds	Furanoid lignans		0
9.34_287.1385m/z	(2-methoxyphenyl)-[2-(5-methyl-1,2-oxazol-3-yl)pyrrolidin-1-yl]methanone	C16H18N2O3	9.33643	-1.76233	287.139	pos	M+H									0
4.98_251.1385m/z	Feruloyl allylamine	C13H15NO3	4.9849	-2.11476	251.139	pos	M+NH4	139291976	NAYMCRXFMBIDTH-FNORWQNLSA-N	COC1=C(C=CC(=C1)/C=C/C(=O)NCC=C)O	1.9					0
7.55_345.0606m/z	5,7,3',4'-Tetrahydroxy-6,8-dimethoxyflavone	C17H14O8	7.54962	-2.86808	345.061	neg	M-H	5321859	GLMWHQIFJIURES-UHFFFAOYSA-N	COC1=C(C(=C2C(=C1O)C(=O)C=C(O2)C3=CC(=C(C=C3)O)O)OC)O	2.3	C04581	Phenylpropanoids and polyketides	Flavonoids	O-methylated flavonoids	0
3.74_282.1190m/z	N6-Methyladenosine	C11H15N5O4	3.73987	-2.30331	282.119	pos	M+H	102175	VQAYFKKCNSOZKM-IOSLPCCCSA-N	CNC1=C2C(=NC=N1)N(C=N2)[C@H]3[C@@H]([C@@H]([C@H](O3)CO)O)O	-0.4		Nucleosides, nucleotides, and analogues	Purine nucleosides		0
4.17_374.2277m/z	Ile Leu Glu	C17H31N3O6	4.16655	-2.26851	374.228	pos	M+H	145456189	HUORUFRRJHELPD-MNXVOIDGSA-N	CC[C@H](C)[C@@H](C(=O)N[C@@H](CC(C)C)C(=O)N[C@@H](CCC(=O)O)C(=O)O)N	-1.7		Organic acids and derivatives	Carboxylic acids and derivatives	Amino acids, peptides, and analogues	0
3.94_314.2068m/z	Pro Val Val	C15H27N3O4	3.94425	-2.07209	314.207	pos	M+H	15199694	FHJQROWZEJFZPO-SRVKXCTJSA-N	CC(C)[C@@H](C(=O)N[C@@H](C(C)C)C(=O)O)NC(=O)[C@@H]1CCCN1	-2.2		Organic acids and derivatives	Carboxylic acids and derivatives	Amino acids, peptides, and analogues	0

## Sheet: Fig5 Stem
ID	Metabolite	Formula	Retention time(min)	Mass Error (ppm)	m/z	Mode	Adducts	Pubchem_ID	InChiKeys	SMILES	xlogp	KEGG	classA	classB	classC	NXJJ
6.88_172.0730n	1,4-Cyclohexanedicarboxylic acid	C8H12O4	6.87993	-3.03508	171.066	neg	M-H, 2M-H	14106	PXGZQGDTEZPERC-UHFFFAOYSA-N	C1CC(CCC1C(=O)O)C(=O)O	0.5		Organic acids and derivatives	Carboxylic acids and derivatives	Dicarboxylic acids and derivatives	5.30522e+08
0.79_377.0845m/z	Trehalose	C12H22O11	0.793683	-3.23365	377.085	neg	M+Cl	7427	HDTRYLNUVZCQOY-LIZSDCNHSA-N	C([C@@H]1[C@H]([C@@H]([C@H]([C@H](O1)O[C@@H]2[C@@H]([C@H]([C@@H]([C@H](O2)CO)O)O)O)O)O)O)O	-4.2	C01083	Organic oxygen compounds	Organooxygen compounds	Carbohydrates and carbohydrate conjugates	9.72577e+07
8.41_361.0906m/z	5,7,3'-Trihydroxy-6,4',5'-trimethoxyflavone	C18H16O8	8.41495	-3.21578	361.091	pos	M+H	5496475	PMBOOVZSTMWOFS-UHFFFAOYSA-N	COC1=CC(=CC(=C1OC)O)C2=CC(=O)C3=C(O2)C=C(C(=C3O)OC)O	2.6	C04552	Phenylpropanoids and polyketides	Flavonoids	O-methylated flavonoids	8.18398e+07
0.79_342.1151n	α，β-Trehalose	C12H22O11	0.789917	-3.30083	381.078	pos	M+K, 2M+K, M+Na	10871590	HDTRYLNUVZCQOY-BTLHAWITSA-N	C([C@@H]1[C@H]([C@@H]([C@H]([C@H](O1)O[C@H]2[C@@H]([C@H]([C@@H]([C@H](O2)CO)O)O)O)O)O)O)O	-4.2	C01083	Organic oxygen compounds	Organooxygen compounds	Carbohydrates and carbohydrate conjugates	7.77802e+07
8.06_330.2398n	9S,10S,11R-trihydroxy-12Z-octadecenoic acid	C18H34O5	8.0575	-2.41644	329.233	neg	M-H, 2M-H, M+Cl	16061050	JHGVFGJXFVIYSM-BSHMHQBXSA-N	CCCCC/C=C\[C@H]([C@H]([C@H](CCCCCCCC(=O)O)O)O)O	3.5		Lipids and lipid-like molecules	Fatty Acyls	Fatty acids and conjugates	7.68124e+07
1.43_268.1033m/z	Adenosine	C10H13N5O4	1.43417	-2.91788	268.103	pos	M+H	60961	OIRDTQYFTABQOQ-KQYNXXCUSA-N	C1=NC(=C2C(=N1)N(C=N2)[C@H]3[C@@H]([C@@H]([C@H](O3)CO)O)O)N	-1.1	C00212	Nucleosides, nucleotides, and analogues	Purine nucleosides		5.30525e+07
4.66_354.0942n	Cyclohexanecarboxylic acid	C16H18O9	4.66087	-2.61987	355.101	pos	M+H-H2O, M+H, M+K, M+Na, 2M+Na, M+NH4	7413	NZNMSOFKMUBTKW-UHFFFAOYSA-N	C1CCC(CC1)C(=O)O	1.9	C09822	Organic acids and derivatives	Carboxylic acids and derivatives	Carboxylic acids	4.65247e+07
6.18_508.1207n	Syringetin-3-O-galactoside	C23H24O13	6.18157	-1.86264	509.128	pos	M+H, M+Na	20056941	JMFWYRWPJVEZPV-SFBSONLZSA-N	COC1=CC(=CC(=C1O)OC)C2=C(C(=O)C3=C(C=C(C=C3O2)O)O)OC4[C@@H]([C@H]([C@H]([C@H](O4)CO)O)O)O	0.7		Phenylpropanoids and polyketides	Flavonoids	Flavonoid glycosides	4.08803e+07
1.20_118.0262n	Succinic acid	C4H6O4	1.2041	-3.74453	117.019	neg	M-H, M+Cl, M-H2O-H	1110	KDYFGRWQOYBRFD-UHFFFAOYSA-N	C(CC(=O)O)C(=O)O	-0.6	C00042	Organic acids and derivatives	Carboxylic acids and derivatives	Dicarboxylic acids and derivatives	3.98879e+07
5.34_480.0892n	Gossypin	C21H20O13	5.33662	-2.42722	481.097	pos	M+H, M+Na					C10051				3.61329e+07
0.79_539.1374m/z	Raffinose	C18H32O16	0.793683	-2.14831	539.137	neg	M+Cl	439242	MUPFEKGTMRGPLJ-ZQSKZDJDSA-N	C([C@@H]1[C@@H]([C@@H]([C@H]([C@H](O1)OC[C@@H]2[C@H]([C@@H]([C@H]([C@H](O2)O[C@]3([C@H]([C@@H]([C@H](O3)CO)O)O)CO)O)O)O)O)O)O)O	-5.8	C00492	Organic oxygen compounds	Organooxygen compounds	Carbohydrates and carbohydrate conjugates	3.56779e+07
0.83_863.2428m/z	Verbascose	C30H52O26	0.834033	-1.5685	863.243	neg	M+Cl					C08252				2.98182e+07
6.17_516.1256n	3,4-Dicaffeoylquinic acid	C25H24O12	6.16993	-2.32534	515.118	neg	M-2H, M-H	5281780	UFCLZKMFXSILNL-PSEXTPKNSA-N	C1[C@H]([C@H]([C@@H](C[C@@]1(C(=O)O)O)OC(=O)/C=C/C2=CC(=C(C=C2)O)O)OC(=O)/C=C/C3=CC(=C(C=C3)O)O)O	1.5		Organic oxygen compounds	Organooxygen compounds	Alcohols and polyols	2.44617e+07
4.66_162.0313n	4-Methylphthalic anhydride	C9H6O3	4.66087	-2.55444	163.039	pos	M+H-H2O, M+H	88069	ZOXBWJMCXHTKNU-UHFFFAOYSA-N	CC1=CC2=C(C=C1)C(=O)OC2=O	1.7		Organoheterocyclic compounds	Benzofurans	Benzofuranones	2.16156e+07
1.63_231.0140m/z	Maleic acid	C4H4O4	1.62638	-2.96133	231.014	neg	2M-H	444266	VZCYOOQTPOCHFL-UPHRSURJSA-N	C(=C\C(=O)O)\C(=O)O	-0.3	C01384	Organic acids and derivatives	Carboxylic acids and derivatives	Dicarboxylic acids and derivatives	2.09241e+07
5.97_495.1122m/z	Laricitrin 3-galactoside	C22H22O13	5.97053	-2.22778	495.112	pos	M+H									1.81884e+07
3.04_153.1271m/z	(R)-Camphor	C10H16O	3.04152	-2.09831	153.127	pos	M+H	159055	DSSYKIVIOFKYAU-XCBNKYQSSA-N	C[C@@]12CC[C@@H](C1(C)C)CC2=O	2.2	C00808	Lipids and lipid-like molecules	Prenol lipids	Monoterpenoids	1.68881e+07
7.35_209.0298m/z	Mucicacid	C6H10O8	7.3489	-2.4988	209.03	neg	M-H	3037582	DSLZVSRJTYRBFB-DUHBMQHGSA-N	[C@@H]([C@@H]([C@H](C(=O)O)O)O)([C@@H](C(=O)O)O)O	-2.5	C00879	Organic oxygen compounds	Organooxygen compounds	Carbohydrates and carbohydrate conjugates	1.58253e+07
3.64_203.0820m/z	D-Tryptophan	C11H12N2O2	3.63682	-2.73271	203.082	neg	M-H	9060	QIVBCDIJIAJPQS-SECBINFHSA-N	C1=CC=C2C(=C1)C(=CN2)C[C@H](C(=O)O)N	-1.1	C00525	Organoheterocyclic compounds	Indoles and derivatives	Indolyl carboxylic acids and derivatives	1.46773e+07
5.72_465.1018m/z	Spiraeoside	C21H20O12	5.72168	-2.04774	465.102	pos	M+H	5320844	OIUBYZLTFSLSBY-HMGRVEAOSA-N	C1=CC(=C(C=C1C2=C(C(=O)C3=C(C=C(C=C3O2)O)O)O)O)O[C@H]4[C@@H]([C@H]([C@@H]([C@H](O4)CO)O)O)O	0.4		Phenylpropanoids and polyketides	Flavonoids	Flavonoid glycosides	1.43066e+07
8.80_161.0240m/z	3 Hydroxycoumarin	C9H6O3	8.80318	-2.37124	161.024	neg	M-H	13650	MJKVTPMWOKAVMS-UHFFFAOYSA-N	C1=CC=C2C(=C1)C=C(C(=O)O2)O	1.8		Phenylpropanoids and polyketides	Coumarins and derivatives	Hydroxycoumarins	1.35239e+07
1.23_191.0193m/z	Citrate	C6H8O7	1.2276	-2.38215	191.019	neg	M-H	31348	KRKNYBCHXYNGOX-UHFFFAOYSA-K	C(C(=O)[O-])C(CC(=O)[O-])(C(=O)[O-])O	0.2	C00158	Organic acids and derivatives	Carboxylic acids and derivatives	Tricarboxylic acids and derivatives	1.02697e+07
3.66_360.1047n	1-O-(3-Hydroxy-4,5-dimethoxybenzoyl)hexopyranose	C15H20O10	3.65662	-2.58236	359.097	neg	M-H, M+Cl									9.82686e+06
1.90_165.0785n	D-phenylalanine	C9H11NO2	1.90188	-2.71996	164.071	neg	M-H, 2M-H	71567	COLNVLDHVKWLRT-MRVPVSSYSA-N	C1=CC=C(C=C1)C[C@H](C(=O)O)N	-1.5	C02265	Organic acids and derivatives	Carboxylic acids and derivatives	Amino acids, peptides, and analogues	9.79086e+06
6.60_493.1331m/z	6-Hydroxyluteolin 6,3'-dimethyl ether 7-glucoside	C23H24O12	6.60338	-1.84436	493.133	pos	M+H	44258501	YFZSQPRYLBGYKE-SLYRBRRESA-N	COC1=C(C=CC(=C1)C2=CC(=O)C3=C(C(=C(C=C3O2)O[C@H]4C([C@H]([C@@H](C(O4)CO)O)O)O)OC)O)O	0.8		Phenylpropanoids and polyketides	Flavonoids	Flavonoid glycosides	9.00116e+06
5.35_959.1720m/z	Myricetin-3-O-galactoside	C21H20O13	5.35247	-1.56168	959.172	neg	2M-H	5491408	FOHXFLPXBUAOJM-MGMURXEASA-N	C1=C(C=C(C(=C1O)O)O)C2=C(C(=O)C3=C(C=C(C=C3O2)O)O)O[C@H]4[C@@H]([C@H]([C@H]([C@H](O4)CO)O)O)O	0		Phenylpropanoids and polyketides	Flavonoids	Flavonoid glycosides	8.41296e+06
6.15_505.0979m/z	Quercetin 3-O-beta-glucopyranosyl-6'-acetate	C23H22O13	6.1479	-1.76349	505.098	neg	M-H									7.48744e+06
10.79_519.3315n	PC(18:2/0:0)	C26H50NO7P	10.7931	-1.86819	520.339	pos	M+H, M+K, M+Na	497299	IHNKQIMGVNPMTC-RUZDIDTESA-N	CCCCCCCCCCCCCCCCCC(=O)OC[C@H](COP(=O)([O-])OCC[N+](C)(C)C)O	6.6		Lipids and lipid-like molecules	Glycerophospholipids	Glycerophosphocholines	6.60482e+06
3.66_153.0189m/z	Protocatechuic acid	C7H6O4	3.65662	-2.68206	153.019	neg	M-H	72	YQUVCSBJEUQKSH-UHFFFAOYSA-N	C1=CC(=C(C=C1C(=O)O)O)O	1.1	C00230	Benzenoids	Benzene and substituted derivatives	Benzoic acids and derivatives	6.42078e+06
6.40_196.1095n	Loliolide	C11H16O3	6.40278	-2.16399	197.117	pos	M+H-H2O, M+H, M+ACN+H, M+H-2H2O	100332	XEVQXKKKAVVSMW-WRWORJQWSA-N	C[C@@]12C[C@H](CC(C1=CC(=O)O2)(C)C)O	1		Organoheterocyclic compounds	Benzofurans		6.32771e+06
11.40_834.5282m/z	GPSer(22:6/18:0)	C46H78NO10P	11.4002	-0.967084	834.528	neg	M-H									6.27782e+06
0.91_133.0139m/z	malate	C4H6O5	0.91045	-2.75594	133.014	neg	M-H	525	BJEPYKJPYRNKOW-UHFFFAOYSA-N	C(C(C(=O)O)O)C(=O)O	-1.3	C00711	Organic acids and derivatives	Hydroxy acids and derivatives	Beta hydroxy acids and derivatives	5.31688e+06
0.86_213.0167m/z	D-(-)-Gulono-gamma-lactone	C6H10O6	0.861783	-2.58163	213.017	neg	M+Cl									5.24526e+06
2.30_146.1172m/z	N-Methylisoleucine	C7H15NO2	2.29983	-2.36422	146.117	pos	M+H	560437	KSPIYJQBLVDRRI-UHFFFAOYSA-N	CCC(C)C(C(=O)O)NC	-1.8		Organic acids and derivatives	Carboxylic acids and derivatives	Amino acids, peptides, and analogues	4.73167e+06
6.48_187.0971m/z	Azelaic acid	C9H16O4	6.4755	-2.75232	187.097	neg	M-H	2266	BDJRBEYXGGNYIS-UHFFFAOYSA-N	C(CCCC(=O)O)CCCC(=O)O	1.6	C08261	Lipids and lipid-like molecules	Fatty Acyls	Fatty acids and conjugates	4.6382e+06
6.16_551.1021m/z	Quercetin 3-O-malonylglucoside	C24H22O15	6.15927	-1.81801	551.102	pos	M+H	5282159	NBQPHANHNTWDML-UJKBSQBPSA-N	C1=CC(=C(C=C1C2=C(C(=O)C3=C(C=C(C=C3O2)O)O)O[C@H]4[C@@H]([C@H]([C@@H]([C@H](O4)COC(=O)CC(=O)O)O)O)O)O)O	0.1	C12638	Phenylpropanoids and polyketides	Flavonoids	Flavonoid glycosides	3.59907e+06
6.23_479.1174m/z	Isorhamnetin-3-galactoside	C22H22O12	6.22755	-2.08289	479.117	pos	M+H	13245586	CQLRUIIRRZYHHS-UHFFFAOYSA-N	COC1=C(C=CC(=C1)C2=C(C(=O)C3=C(C=C(C=C3O2)O)O)OC4C(C(C(C(O4)CO)O)O)O)O	0.7		Phenylpropanoids and polyketides	Flavonoids	Flavonoid glycosides	3.14695e+06
5.91_206.0817m/z	N-acetylphenylalanine	C11H13NO3	5.90983	-2.57456	206.082	neg	M-H	74839	CBQJSKKFNMDLON-JTQLQIEISA-N	CC(=O)N[C@@H](CC1=CC=CC=C1)C(=O)O	0.6		Organic acids and derivatives	Carboxylic acids and derivatives	Amino acids, peptides, and analogues	3.03531e+06
6.07_516.1257n	Isochlorogenic acid A	C25H24O12	6.0677	-2.17	515.118	neg	M-2H, M-H	6474310	KRZBCHWVBQOTNZ-RDJMKVHDSA-N	C1C(C[C@H](C([C@@H]1OC(=O)/C=C/C2=CC(=C(C=C2)O)O)O)OC(=O)/C=C/C3=CC(=C(C=C3)O)O)(O)C(=O)O	1.5	C10468	Organic oxygen compounds	Organooxygen compounds	Alcohols and polyols	2.97887e+06
10.87_310.2136n	13S-Hydroperoxy-9Z,11E,15Z-octadecatrienoic acid	C18H30O4	10.8661	-2.47823	293.21	pos	M+H-H2O, M+H, M+ACN+H	5497123	UYQGVDXDXBAABN-FQSPHKRJSA-N	CC/C=C\C[C@@H](/C=C/C=C\CCCCCCCC(=O)O)OO	4.8		Lipids and lipid-like molecules	Fatty Acyls	Lineolic acids and derivatives	2.78093e+06
10.19_517.3158n	PC(18:3/0:0)	C26H48NO7P	10.1864	-1.99308	518.323	pos	M+H, M+Na	24779469	WKQNRCYKYCKESD-YVHLTTHBSA-N	CC/C=C\C/C=C\C/C=C\CCCCCCCC(=O)OC[C@H](COP(=O)([O-])OCC[N+](C)(C)C)O	4.3		Lipids and lipid-like molecules	Glycerophospholipids	Glycerophosphocholines	2.78064e+06
2.58_282.1191m/z	2'-O-Methyladenosine	C11H15N5O4	2.58262	-2.20729	282.119	pos	M+H	102213	FPUGCISOLXNPPC-IOSLPCCCSA-N	CO[C@@H]1[C@@H]([C@H](O[C@H]1N2C=NC3=C(N=CN=C32)N)CO)O	-0.5		Nucleosides, nucleotides, and analogues	Purine nucleosides		2.76471e+06
1.03_243.0629m/z	Uridine	C9H12N2O6	1.02993	2.73513	243.063	neg	M-H	6029	DRTQHJPVMGBUCF-XVFCMESISA-N	C1=CN(C(=O)NC1=O)[C@H]2[C@@H]([C@@H]([C@H](O2)CO)O)O	-2	C00299	Nucleosides, nucleotides, and analogues	Pyrimidine nucleosides		2.52358e+06
5.47_172.0975m/z	N-Acetyl-leucine	C8H15NO3	5.46552	-2.29244	172.098	neg	M-H	70912	WXNXCEHXYPACJF-ZETCQYMHSA-N	CC(C)C[C@@H](C(=O)O)NC(=O)C	0.5	C02710	Organic acids and derivatives	Carboxylic acids and derivatives	Amino acids, peptides, and analogues	2.52061e+06
1.03_86.0968m/z	Piperidine	C5H11N	1.03448	4.31138	86.0968	pos	M+H	8082	NQRYJNQNLNOLGT-UHFFFAOYSA-N	C1CCNCC1	0.8	C01746	Organoheterocyclic compounds	Piperidines		2.48128e+06
8.85_180.1146n	Dihydroactinidiolide	C11H16O2	8.84733	-2.51107	181.122	pos	M+H, M+ACN+H, M+H-H2O, M+H-2H2O	27209	IMKHDCBNRDRUEB-UHFFFAOYSA-N	CC1(CCCC2(C1=CC(=O)O2)C)C	2.2		Organoheterocyclic compounds	Benzofurans		2.43386e+06
1.34_152.0564m/z	Guanine	C5H5N5O	1.34035	-1.80985	152.056	pos	M+H	135398634	UYTPUPDQBNUYGX-UHFFFAOYSA-N	C1=NC2=C(N1)C(=O)NC(=N2)N	-1.1	C00242	Organoheterocyclic compounds	Imidazopyrimidines	Purines and purine derivatives	2.41058e+06
6.21_477.1024m/z	Isorhamnetin-3-O-glucoside	C22H22O12	6.21292	-3.07228	477.102	neg	M-H	5318645	CQLRUIIRRZYHHS-LFXZADKFSA-N	COC1=C(C=CC(=C1)C2=C(C(=O)C3=C(C=C(C=C3O2)O)O)O[C@H]4[C@@H]([C@H]([C@@H]([C@H](O4)CO)O)O)O)O	0.7	C22589	Phenylpropanoids and polyketides	Flavonoids	Flavonoid glycosides	2.36215e+06
5.76_303.0492m/z	quercetin	C15H10O7	5.75683	-2.36778	303.049	pos	M+H	5280343	REFJWTPEDVJJIY-UHFFFAOYSA-N	C1=CC(=C(C=C1C2=C(C(=O)C3=C(C=C(C=C3O2)O)O)O)O)O	1.5	C00389	Phenylpropanoids and polyketides	Flavonoids	Flavones	2.22585e+06
4.76_403.1598m/z	Diethyloxalpropionate	C9H14O5	4.76215	-2.79586	403.16	neg	2M-H	97750	OQOCQBJWOCRPQY-UHFFFAOYSA-N	CCOC(=O)C(C)C(=O)C(=O)OCC	1.3	C04067	Organic acids and derivatives	Keto acids and derivatives	Beta-keto acids and derivatives	2.21628e+06
7.09_359.0763m/z	Centaureidin	C18H16O8	7.08875	-2.50687	359.076	neg	M-H	5315773	BZXULYMZYPRZOG-UHFFFAOYSA-N	COC1=C(C=C(C=C1)C2=C(C(=O)C3=C(O2)C=C(C(=C3O)OC)O)OC)O	2.8		Phenylpropanoids and polyketides	Flavonoids	O-methylated flavonoids	2.21322e+06
0.88_226.9958m/z	D-threo-Isocitric acid	C6H8O7	0.880417	-3.11901	226.996	neg	M+Cl	5318532	ODBLHEXUDAPZAU-ZAFYKAAXSA-N	C([C@@H]([C@H](C(=O)O)O)C(=O)O)C(=O)O	-1.8	C00451	Organic acids and derivatives	Carboxylic acids and derivatives	Tricarboxylic acids and derivatives	1.93204e+06
9.77_312.2293n	9-Hydroxy-10,12-octadecadienoic acid	C18H32O4	9.76813	-2.333	311.222	neg	M-H2O-H, M-H	5282945	NPDSHTNEKLQQIJ-SIGMCMEVSA-N	CCCCC/C=C/C=C/C(CCCCCCCC(=O)O)O	5.3	C21923	Lipids and lipid-like molecules	Fatty Acyls	Lineolic acids and derivatives	1.90147e+06
5.72_927.1822m/z	Quercetin-3-O-glucoside	C21H20O12	5.7212	-1.56426	927.182	neg	2M-H	22630387	RPVIQWDFJPYNJM-UHFFFAOYSA-N	C1=CC(=C(C=C1C2=C(C(=O)C3=C(C=C(C=C3O2)O)O)OC4C(C(C(C(O4)CO)O)O)O)O)OC5C(C(C(C(O5)CO)O)O)O	-1.4	C05623	Phenylpropanoids and polyketides	Flavonoids	Flavonoid glycosides	1.869e+06
7.27_303.0491m/z	Tricetin	C15H10O7	7.27465	-2.59982	303.049	pos	M+H	5281701	ARSRJFRKVXALTF-UHFFFAOYSA-N	C1=C(C=C(C(=C1O)O)O)C2=CC(=O)C3=C(C=C(C=C3O2)O)O	1	C10192	Phenylpropanoids and polyketides	Flavonoids	Flavones	1.83287e+06
7.04_428.1669n	1-[3-[(4-fluorophenyl)methyl]-4-oxothieno[3,2-d]pyrimidin-2-yl]-N-propylpiperidine-4-carboxamide	C22H25FN4O2S	7.04355	-3.04023	429.174	pos	M+Na, 2M+H, M+K, M+NH4, M+H, M+H-H2O, M+H-2H2O									1.83228e+06
0.81_133.0739n	N-Methylthreonine	C5H11NO3	0.8108	0.285119	116.071	pos	M+H-H2O, M+H	7010355	CCAIIPMIAFGKSI-DMTCNVIQSA-N	C[C@H]([C@@H](C(=O)O)NC)O	-3.1		Organic acids and derivatives	Carboxylic acids and derivatives	Amino acids, peptides, and analogues	1.76953e+06
5.09_177.0189m/z	Esculetin	C9H6O4	5.08508	-2.41614	177.019	neg	M-H	5281416	ILEDWLMCKZNDJK-UHFFFAOYSA-N	C1=CC(=O)OC2=CC(=C(C=C21)O)O	1.2	C09263	Phenylpropanoids and polyketides	Coumarins and derivatives	Hydroxycoumarins	1.74801e+06
10.20_351.2521m/z	(E)-5-(1,2,4a,5-tetramethyl-7-oxo-3,4,8,8a-tetrahydro-2H-naphthalen-1-yl)-3-methylpent-2-enoic acid	C20H30O3	10.1988	-2.80631	351.252	pos	M+CH3OH+H	13918478	SLMFLTPPPXRYHP-JLHYYAGUSA-N	CC1CCC2(C(C1(C)CC/C(=C/C(=O)O)/C)CC(=O)C=C2C)C	4.8		Lipids and lipid-like molecules	Prenol lipids	Diterpenoids	1.60728e+06
4.62_160.0521n	2,6-Dihydroxynaphthalene	C10H8O2	4.6153	-2.1384	193.086	pos	M+H, 2M+ACN+H, M+CH3OH+H	93552	MNZMMCVIXORAQL-UHFFFAOYSA-N	C1=CC2=C(C=CC(=C2)O)C=C1O	2.3	C16213	Benzenoids	Naphthalenes	Naphthols and derivatives	1.4666e+06
1.03_284.0983m/z	Guanosine	C10H13N5O5	1.03448	-2.41588	284.098	pos	M+H	135398635	NYHBQMYGNKIUIF-UUOKFMHZSA-N	C1=NC2=C(N1[C@H]3[C@@H]([C@@H]([C@H](O3)CO)O)O)N=C(NC2=O)N	-1.9	C00387	Nucleosides, nucleotides, and analogues	Purine nucleosides		1.45432e+06
7.92_230.2474m/z	N,N-Dimethyldodecylamine N-oxide	C14H31NO	7.92032	-2.07058	230.247	pos	M+H	15433	SYELZBGXAIXKHU-UHFFFAOYSA-N	CCCCCCCCCCCC[N+](C)(C)[O-]	5.3		Organic nitrogen compounds	Organonitrogen compounds	Aminoxides	1.39896e+06
11.24_495.3314n	PC(16:0/0:0)	C24H50NO7P	11.2351	-2.13144	496.339	pos	M+H, M+Na	460602	ASWBNKHCZGQVJV-HSZRJFAPSA-N	CCCCCCCCCCCCCCCC(=O)OC[C@H](COP(=O)([O-])OCC[N+](C)(C)C)O	5.6		Lipids and lipid-like molecules	Glycerophospholipids	Glycerophosphocholines	1.3626e+06
0.82_243.0850n	Cytidine	C9H13N3O5	0.821567	-1.985	244.092	pos	M+H, 2M+Na, 2M+H	6175	UHDGCWIWMRVCDJ-XVFCMESISA-N	C1=CN(C(=O)N=C1N)[C@H]2[C@@H]([C@@H]([C@H](O2)CO)O)O	-2.1	C00475	Nucleosides, nucleotides, and analogues	Pyrimidine nucleosides		1.28547e+06
6.15_479.0813m/z	Quercetin 3-O-glucuronide	C21H18O13	6.1472	-1.49902	479.081	pos	M+H	5274585	DUBCCGAQYVUYEU-ZUGPOPFOSA-N	C1=CC(=C(C=C1C2=C(C(=O)C3=C(C=C(C=C3O2)O)O)O[C@H]4[C@@H]([C@H]([C@@H]([C@H](O4)C(=O)O)O)O)O)O)O	0.6		Phenylpropanoids and polyketides	Flavonoids	Flavonoid glycosides	1.28214e+06
5.40_165.0189m/z	Phthalic acid	C8H6O4	5.40348	-2.80619	165.019	neg	M-H	1017	XNGIFLGASWRNHJ-UHFFFAOYSA-N	C1=CC=C(C(=C1)C(=O)O)C(=O)O	0.7	C01606	Benzenoids	Benzene and substituted derivatives	Benzoic acids and derivatives	1.25724e+06
11.69_294.2187n	9-Oxo-10E,12Z-octadecadienoic acid	C18H30O3	11.6911	-2.54018	295.226	pos	M+H, M+Na	9839084	LUZSWWYKKLTDHU-ZJHFMPGASA-N	CCCCC/C=C\C=C\C(=O)CCCCCCCC(=O)O	5.2		Lipids and lipid-like molecules	Fatty Acyls	Lineolic acids and derivatives	1.20133e+06
2.52_218.1027m/z	Pantothenic acid	C9H17NO5	2.52208	-2.97234	218.103	neg	M-H	6613	GHOKWGTUZJEAQD-ZETCQYMHSA-N	CC(C)(CO)[C@H](C(=O)NCCC(=O)O)O	-1.1	C00864	Organic oxygen compounds	Organooxygen compounds	Alcohols and polyols	1.17698e+06
5.05_377.1447m/z	Flavin mononucleotide	C17H20N4O6	5.05055	-2.40482	377.145	pos	M+H	643976	FVTCRASFADXXNN-SCRDCRAPSA-N	CC1=CC2=C(C=C1C)N(C3=NC(=O)NC(=O)C3=N2)C[C@@H]([C@@H]([C@@H](COP(=O)(O)O)O)O)O	-2.6	C00061	Nucleosides, nucleotides, and analogues	Flavin nucleotides		1.13145e+06
0.81_103.0637n	gamma-Aminobutyric acid	C4H9NO2	0.8108	3.84825	104.071	pos	M+H-H2O, M+H	119	BTCSSZJGUNDROE-UHFFFAOYSA-N	C(CC(=O)O)CN	-3.2	C00334	Organic acids and derivatives	Carboxylic acids and derivatives	Amino acids, peptides, and analogues	962844
5.50_433.1130m/z	Hemiphloin	C21H22O10	5.49628	-2.4104	433.113	neg	M-H	160711	QKPKGDDHOGIEOO-JVVVWQBKSA-N	C1[C@H](OC2=C(C1=O)C(=C(C(=C2)O)[C@H]3[C@@H]([C@H]([C@@H]([C@H](O3)CO)O)O)O)O)C4=CC=C(C=C4)O	-0.1		Phenylpropanoids and polyketides	Flavonoids	Flavonoid glycosides	931136
6.13_299.0189m/z	Irigenol	C15H10O8	6.12753	-2.71522	299.019	neg	M-H2O-H									904383
5.57_611.1598m/z	RUTIN	C27H30O16	5.56797	-1.3909	611.16	pos	M+H	5280805	IKGXIBQEEMLURG-NVPNHPEKSA-N	C[C@H]1[C@@H]([C@H]([C@H]([C@@H](O1)OC[C@@H]2[C@H]([C@@H]([C@H]([C@@H](O2)OC3=C(OC4=CC(=CC(=C4C3=O)O)O)C5=CC(=C(C=C5)O)O)O)O)O)O)O)O	-1.3	C05625	Phenylpropanoids and polyketides	Flavonoids	Flavonoid glycosides	891272
5.61_207.0657m/z	Sinapaldehyde	C11H12O4	5.60717	-2.61742	207.066	neg	M-H	5280802	CDICDSOGTRCHMG-ONEGZZNKSA-N	COC1=CC(=CC(=C1O)OC)/C=C/C=O	1.4	C05610	Benzenoids	Phenols	Methoxyphenols	821962
3.63_118.0651m/z	2-Aminoacetophenone	C8H9NO	3.6343	0.0660587	118.065	pos	M+H-H2O	11952	HEQOJEGTZCTHCF-UHFFFAOYSA-N	C1=CC=C(C=C1)C(=O)CN	0.8		Organic oxygen compounds	Organooxygen compounds	Carbonyl compounds	813736
5.85_151.0397m/z	Vanillin	C8H8O3	5.85038	-2.53617	151.04	neg	M-H	1183	MWOOGOJBHIARFG-UHFFFAOYSA-N	COC1=C(C=CC(=C1)C=O)O	1.2	C00755	Benzenoids	Phenols	Methoxyphenols	807957
4.83_287.0542m/z	Scutellarein	C15H10O6	4.82712	-2.77809	287.054	pos	M+H	5281697	JVXZRQGOGOXCEC-UHFFFAOYSA-N	C1=CC(=CC=C1C2=CC(=O)C3=C(O2)C=C(C(=C3O)O)O)O	1.4	C10184	Phenylpropanoids and polyketides	Flavonoids	Flavones	787496
1.19_129.0425n	L-Pyroglutamic acid	C5H7NO3	1.19307	-0.717222	130.05	pos	M+H, M+ACN+H	7405	ODHCTXKNWHHXJC-VKHMYHEASA-N	C1CC(=O)N[C@@H]1C(=O)O	-0.8	C01879	Organic acids and derivatives	Carboxylic acids and derivatives	Amino acids, peptides, and analogues	701083
7.49_317.0649m/z	3-O-Methylquercetin	C16H12O7	7.48722	-2.24022	317.065	pos	M+H	5280681	WEPBGSIAWZTEJR-UHFFFAOYSA-N	COC1=C(OC2=CC(=CC(=C2C1=O)O)O)C3=CC(=C(C=C3)O)O	2.5	C04443	Phenylpropanoids and polyketides	Flavonoids	O-methylated flavonoids	693874
5.98_181.0502m/z	Syringaldehyde	C9H10O4	5.97972	-2.17245	181.05	neg	M-H	8655	KCDXJAYRVLXPFO-UHFFFAOYSA-N	COC1=CC(=CC(=C1O)OC)C=O	0		Benzenoids	Phenols	Methoxyphenols	667200
6.69_137.0240m/z	p-Hydroxybenzoic acid	C7H6O3	6.6949	-2.71861	137.024	neg	M-H	135	FJKROLUGYXJWQN-UHFFFAOYSA-N	C1=CC(=CC=C1C(=O)O)O	1.6	C00156	Benzenoids	Benzene and substituted derivatives	Benzoic acids and derivatives	665866
7.81_466.2194n	4-(4-benzyl-2,3-dioxopiperazin-1-yl)-N-(2,5-dimethoxyphenyl)piperidine-1-carboxamide	C25H30N4O5	7.80528	-4.81793	467.227	pos	M+H-2H2O, M+H-H2O, M+H									660372
4.21_179.0346m/z	caffeic acid	C9H8O4	4.20835	-2.33571	179.035	neg	M-H	689043	QAIPRVGONGVQAS-DUXPYHPUSA-N	C1=CC(=C(C=C1/C=C/C(=O)O)O)O	1.2	C01481	Phenylpropanoids and polyketides	Cinnamic acids and derivatives	Hydroxycinnamic acids and derivatives	655216
6.33_291.0968m/z	Malonyltryptophan	C14H14N2O5	6.32682	-2.50433	291.097	pos	M+H	5199636	OVEAWSPZRGBTSS-UHFFFAOYSA-N	C1=CC=C2C(=C1)C(=CN2)CC(C(=O)O)NC(=O)CC(=O)O	0.3		Organic acids and derivatives	Carboxylic acids and derivatives	Amino acids, peptides, and analogues	637176
3.81_229.1541m/z	Leu Pro	C11H20N2O3	3.81435	-2.33177	229.154	pos	M+H									632647
5.56_434.1206n	Naringenin 5-O-beta-D-glucopyranoside	C21H22O10	5.55783	-1.50029	435.128	pos	M+H-H2O, M+H	3083618	MFQIWHVVFBCURA-KYSZGLPYSA-N	C1[C@@H](OC2=C(C1=O)C(=CC(=C2)O)O[C@H]3[C@@H]([C@H]([C@@H]([C@H](O3)CO)O)O)O)C4=CC=C(C=C4)O	0		Phenylpropanoids and polyketides	Flavonoids	Flavonoid glycosides	632631
1.65_281.1489m/z	Val Tyr	C14H20N2O4	1.65085	-2.28433	281.149	pos	M+H	7009555	VEYJKJORLPYVLO-RYUDHWBXSA-N	CC(C)[C@@H](C(=O)N[C@@H](CC1=CC=C(C=C1)O)C(=O)O)N	-2.5		Organic acids and derivatives	Carboxylic acids and derivatives	Amino acids, peptides, and analogues	627355
5.10_167.0345m/z	Vanillic acid	C8H8O4	5.0956	-2.59883	167.035	neg	M-H	8468	WKOLLVMJNQIZCI-UHFFFAOYSA-N	COC1=C(C=CC(=C1)C(=O)O)O	1.4	C06672	Benzenoids	Benzene and substituted derivatives	Benzoic acids and derivatives	587822
6.17_449.1068m/z	Cynaroside	C21H20O11	6.16943	-2.30575	449.107	pos	M+H	5280637	PEFNSGRTCBGNAN-QNDFHXLGSA-N	C1=CC(=C(C=C1C2=CC(=O)C3=C(C=C(C=C3O2)O[C@H]4[C@@H]([C@H]([C@@H]([C@H](O4)CO)O)O)O)O)O)O	0.5	C03951	Phenylpropanoids and polyketides	Flavonoids	Flavonoid glycosides	565670
6.60_329.0659m/z	Jaceosidin	C17H14O7	6.6025	-2.48081	329.066	neg	M-H	5379096	GLAAQZFBFGEBPS-UHFFFAOYSA-N	COC1=C(C=CC(=C1)C2=CC(=O)C3=C(O2)C=C(C(=C3O)OC)O)O	1.7		Phenylpropanoids and polyketides	Flavonoids	O-methylated flavonoids	559504
10.75_476.2772m/z	PE(18:2/0:0)	C23H44NO7P	10.7501	-2.16845	476.277	neg	M-H	9547068	BBYWOYAFBUOUFP-JOCHJYFZSA-N	CCCCCCCCCCCCCCCCCC(=O)OC[C@H](COP(=O)(O)OCCN)O	3.4		Lipids and lipid-like molecules	Glycerophospholipids	Glycerophosphoethanolamines	557562
0.82_112.0506m/z	Cytosine	C4H5N3O	0.821567	0.87657	112.051	pos	M+H	597	OPTASPLRGRRNAP-UHFFFAOYSA-N	C1=C(NC(=O)N=C1)N	-1.7	C00380	Organoheterocyclic compounds	Diazines	Pyrimidines and pyrimidine derivatives	519334
9.87_233.1103m/z	N-Cyclohexyl-2-benzothiazol-amine	C13H16N2S	9.86887	-1.76127	233.11	pos	M+H	591790	UPWPIFMHSFSVLE-UHFFFAOYSA-N	C1CCC(CC1)NC2=NC3=CC=CC=C3S2	4.4		Organoheterocyclic compounds	Benzothiazoles		516473
1.69_260.1599m/z	Gln Ile	C11H21N3O4	1.69367	-2.35077	260.16	pos	M+H	7020102	CNPNWGHRMBQHBZ-ZKWXMUAHSA-N	CC[C@H](C)[C@@H](C(=O)N[C@@H](CCC(=O)N)C(=O)O)N	-4.2		Organic acids and derivatives	Carboxylic acids and derivatives	Amino acids, peptides, and analogues	513544
8.16_467.2265m/z	Glu Arg Tyr	C20H30N6O7	8.15537	3.58334	467.227	pos	M+H	10181671	WVRUKYLYMFGKAN-IHRRRGAJSA-N	C1=CC(=CC=C1C[C@@H](C(=O)N[C@@H](CCC(=O)O)C(=O)N[C@@H](CCC(=O)O)C(=O)O)N)O	-4.8		Organic acids and derivatives	Carboxylic acids and derivatives	Amino acids, peptides, and analogues	501845
3.65_109.0292m/z	Pyrocatechol	C6H6O2	3.64662	-3.08043	109.029	neg	M-H	289	YCIMNLLNPGFGHC-UHFFFAOYSA-N	C1=CC=C(C(=C1)O)O	0.9	C00090	Benzenoids	Phenols	Benzenediols	500416
3.63_174.0790n	Indole-3-acetamide	C10H10N2O	3.6343	-1.91949	175.086	pos	M+H-H2O, M+H	397	ZOAMBXDOGPRZLP-UHFFFAOYSA-N	C1=CC=C2C(=C1)C(=CN2)CC(=O)N	0.8	C02693	Organoheterocyclic compounds	Indoles and derivatives	Indoles	494888
1.53_252.1086m/z	Cordycepin	C10H13N5O3	1.53248	-1.95947	252.109	pos	M+H	6303	OFEZSBMBBKLLBJ-BAJZRUMYSA-N	C1[C@H](O[C@H]([C@@H]1O)N2C=NC3=C(N=CN=C32)N)CO	-1.2	C08431	Nucleosides, nucleotides, and analogues	Purine nucleosides	Purine 3'-deoxyribonucleosides	492530
6.11_163.0396m/z	Phenylpyruvic acid	C9H8O3	6.10918	-2.62419	163.04	neg	M-H	997	BTNMPGBKDVTSJY-UHFFFAOYSA-N	C1=CC=C(C=C1)CC(=O)C(=O)O	1.3	C00166	Benzenoids	Benzene and substituted derivatives	Phenylpyruvic acid derivatives	490455
2.27_156.0662m/z	N-Acetyl-proline	C7H11NO3	2.26707	-2.45606	156.066	neg	M-H	322640	GNMSLDIYJOSUSW-UHFFFAOYSA-N	CC(=O)N1CCCC1C(=O)O	-0.7		Organic acids and derivatives	Carboxylic acids and derivatives	Amino acids, peptides, and analogues	487210
8.00_317.0648m/z	Isorhamnetin	C16H12O7	8.00352	-2.45512	317.065	pos	M+H	5281654	IZQSVPBOUDKVDZ-UHFFFAOYSA-N	COC1=C(C=CC(=C1)C2=C(C(=O)C3=C(C=C(C=C3O2)O)O)O)O	1.9	C10084	Phenylpropanoids and polyketides	Flavonoids	Flavones	485383
6.60_313.0710m/z	Dipteryxin	C17H14O6	6.6025	-2.44908	313.071	neg	M-H	44257265	BSXFDHHTXOAUGB-UHFFFAOYSA-N	COC1=CC=C(C=C1)C2=COC3=C(C(=C(C=C3C2=O)OC)O)O	2.4		Phenylpropanoids and polyketides	Isoflavonoids	O-methylated isoflavonoids	484835
5.01_491.1175m/z	Cyanidin 3-(6''-acetylglucoside)	C23H22O12	5.00887	-1.78009	491.118	pos	M+H									481701
8.58_235.1687m/z	Curcumenol	C15H22O2	8.5798	-2.27386	235.169	pos	M+H	167812	ISFMXVMWEWLJGJ-NZBPQXDJSA-N	C[C@H]1CC[C@@H]2[C@]13CC(=C(C)C)[C@](O3)(C=C2C)O	2.2	C16942	Lipids and lipid-like molecules	Prenol lipids	Sesquiterpenoids	480939
4.60_360.2119m/z	Leu Glu Val	C16H29N3O6	4.6033	-2.85705	360.212	pos	M+H	145456420	HVJVUYQWFYMGJS-GVXVVHGQSA-N	CC(C)C[C@@H](C(=O)N[C@@H](CCC(=O)O)C(=O)N[C@@H](C(C)C)C(=O)O)N	-3.4		Organic acids and derivatives	Carboxylic acids and derivatives	Amino acids, peptides, and analogues	477679
5.98_183.0649m/z	4-Hydroxy-3,5-dimethoxybenzaldehyde	C9H10O4	5.98267	-1.77566	183.065	pos	M+H	8655	KCDXJAYRVLXPFO-UHFFFAOYSA-N	COC1=CC(=CC(=C1O)OC)C=O	0	C02201	Benzenoids	Phenols	Methoxyphenols	467663
1.03_181.0735n	L-Tyrosine	C9H11NO3	1.02993	-2.38027	180.066	neg	M-H, M+Cl	6057	OUYCCCASQSFEME-QMMMGPOBSA-N	C1=CC(=CC=C1C[C@@H](C(=O)O)N)O	-2.3	C00082	Organic acids and derivatives	Carboxylic acids and derivatives	Amino acids, peptides, and analogues	465967
6.53_160.1096n	(R)-2-Hydroxycaprylic acid	C8H16O3	6.53118	-1.97647	141.092	neg	M-H2O-H, M-H	5312860	JKRDADVRIYVCCY-SSDOTTSWSA-N	CCCCCC[C@H](C(=O)O)O	2		Lipids and lipid-like molecules	Fatty Acyls	Fatty acids and conjugates	465033
1.57_283.0676m/z	xanthosine	C10H12N4O6	1.57432	-2.90081	283.068	neg	M-H	64959	UBORTCNDUKBEOP-UUOKFMHZSA-N	C1=NC2=C(N1[C@H]3[C@@H]([C@@H]([C@H](O3)CO)O)O)NC(=O)NC2=O	-2.4	C01762	Nucleosides, nucleotides, and analogues	Purine nucleosides		456129
0.83_221.0896n	N-Acetyl-D-Glucosamine	C8H15NO6	0.831017	-1.70479	222.097	pos	M+H, M+H-2H2O	439174	OVRNDRQMDRJTHS-RTRLPJTCSA-N	CC(=O)N[C@@H]1[C@H]([C@@H]([C@H](OC1O)CO)O)O	-1.7	C00140	Organic oxygen compounds	Organooxygen compounds	Carbohydrates and carbohydrate conjugates	432372
4.32_295.1646m/z	Tyr Leu	C15H22N2O4	4.3232	-2.02224	295.165	pos	M+H	4466134	AUEJLPRZGVVDNU-UHFFFAOYSA-N	CC(C)CC(C(=O)O)NC(=O)C(CC1=CC=C(C=C1)O)N	-1.8		Organic acids and derivatives	Carboxylic acids and derivatives	Amino acids, peptides, and analogues	428777
3.46_346.1254n	4-Hydroxy-3,5-dimethoxybenzyl -D-glucopyranoside	C15H22O9	3.4634	-2.80323	369.115	pos	M+Na, 2M+Na, M+NH4									426012
4.31_465.1026m/z	Glucodistylin	C21H22O12	4.31108	-2.68753	465.103	neg	M-H	14187088	FVQOMEDMFUMIMO-UHFFFAOYSA-N	C1=CC(=C(C=C1C2C(C(=O)C3=C(C=C(C=C3O2)O)O)OC4C(C(C(C(O4)CO)O)O)O)O)O	-0.1		Phenylpropanoids and polyketides	Flavonoids	Flavonoid glycosides	421374
0.84_99.0443m/z	Tulipalin A	C5H6O2	0.840283	2.51506	99.0443	pos	M+H	68352	GSLDEZOOOSBFGP-UHFFFAOYSA-N	C=C1CCOC1=O	0.8	C20578	Organoheterocyclic compounds	Lactones	Gamma butyrolactones	415016
8.13_325.2001m/z	(2E,4E)-12-hydroxy-13-(hydroxymethyl)-3,5,7-trimethyltetradeca-2,4-dienedioic acid	C18H30O6	8.1322	-2.43931	325.2	pos	M+H-H2O	10405119	QFZISQBFEIXWDM-UTLPMFLDSA-N	CC(CCCCC(C(CO)C(=O)O)O)C/C(=C/C(=C/C(=O)O)/C)/C	3.2		Lipids and lipid-like molecules	Fatty Acyls	Fatty acids and conjugates	413177
5.53_177.0553m/z	Coniferaldehyde	C10H10O3	5.52565	-2.53857	177.055	neg	M-H	5280536	DKZBBWMURDFHNE-NSCUHMNNSA-N	COC1=C(C=CC(=C1)/C=C/C=O)O	1.5	C02666	Benzenoids	Phenols	Methoxyphenols	411781
5.99_174.0556m/z	Indoleacetic acid	C10H9NO2	5.98958	-2.67928	174.056	neg	M-H	802	SEOVTRFCIGRIMH-UHFFFAOYSA-N	C1=CC=C2C(=C1)C(=CN2)CC(=O)O	1.4	C00954	Organoheterocyclic compounds	Indoles and derivatives	Indolyl carboxylic acids and derivatives	403159
3.67_197.0450m/z	Syringic acid	C9H10O5	3.66838	-2.68812	197.045	neg	M-H	10742	JMSVCTWVEWCHDZ-UHFFFAOYSA-N	COC1=CC(=CC(=C1O)OC)C(=O)O	1	C10833	Benzenoids	Benzene and substituted derivatives	Benzoic acids and derivatives	401415
6.39_424.1271m/z	1-(4-oxo-4h-chromen-3-yl)-2,3,4,9-tetrahydro-1h-beta-carboline-3-carboxylic acid	C21H16N2O4	6.39213	0.994421	424.127	pos	M+ACN+Na									399408
7.50_315.0503m/z	6-Methoxyluteolin	C16H12O7	7.49582	-2.19427	315.05	neg	M-H	5317284	FHHSEFRSDKWJKJ-UHFFFAOYSA-N	COC1=C(C2=C(C=C1O)OC(=CC2=O)C3=CC(=C(C=C3)O)O)O	1.4		Phenylpropanoids and polyketides	Flavonoids	O-methylated flavonoids	388344
1.03_123.0440m/z	4-Hydroxybenzaldehyde	C7H6O2	1.02553	-0.111172	123.044	pos	M+H	126	RGHHSNMVTDWUBI-UHFFFAOYSA-N	C1=CC(=CC=C1C=O)O	1.4	C00633	Organic oxygen compounds	Organooxygen compounds	Carbonyl compounds	368037
14.81_857.5163n	GPSer(22:6/20:3)	C48H76NO10P	14.8067	-5.16601	858.524	pos	M+H, M+Na									365382
5.84_227.0910m/z	Isoferulic Acid	C10H10O4	5.83575	-2.30847	227.091	pos	M+CH3OH+H	736186	QURCVMIEKCOAJU-HWKANZROSA-N	COC1=C(C=C(C=C1)/C=C/C(=O)O)O	1.5	C10470	Phenylpropanoids and polyketides	Cinnamic acids and derivatives	Hydroxycinnamic acids and derivatives	363304
3.94_197.0450m/z	2-Hydroxy-3,4-Dimethoxybenzoic Acid	C9H10O5	3.93693	-2.6734	197.045	neg	M-H	79737	CJFQIVAOBBTJCI-UHFFFAOYSA-N	COC1=C(C(=C(C=C1)C(=O)O)O)OC	1.9		Benzenoids	Benzene and substituted derivatives	Benzoic acids and derivatives	363294
7.16_263.1282m/z	(+)-Abscisic acid	C15H20O4	7.15988	-2.6738	263.128	neg	M-H	5280896	JLIDBLDQVAYHNE-YKALOCIXSA-N	CC1=CC(=O)CC([C@]1(/C=C/C(=C\C(=O)O)/C)O)(C)C	1.6	C06082	Lipids and lipid-like molecules	Prenol lipids	Sesquiterpenoids	359858
8.80_218.9616m/z	2,4-Dichlorophenoxyacetic acid	C8H6Cl2O3	8.80318	-2.51552	218.962	neg	M-H	1486	OVSKIKFHRZPJSS-UHFFFAOYSA-N	C1=CC(=C(C=C1Cl)Cl)OCC(=O)O	2.8	C03664	Benzenoids	Benzene and substituted derivatives	Phenoxyacetic acid derivatives	355574
1.90_346.0539m/z	3',5'-cyclic GMP	C10H12N5O7P	1.90113	-2.3812	346.054	pos	M+H	135398570	ZOOGRGPOEVQQDX-UUOKFMHZSA-N	C1[C@@H]2[C@H]([C@H]([C@@H](O2)N3C=NC4=C3N=C(NC4=O)N)O)OP(=O)(O1)O	-3.4	C00942	Nucleosides, nucleotides, and analogues	Purine nucleotides	Cyclic purine nucleotides	352242
5.65_503.1901m/z	Olivil 4'-O-Glucoside	C26H34O12	5.64507	-2.08259	503.19	pos	M+H-2H2O	14033815	SXGSYHDLSPXCMU-CTQTXEDXSA-N	COC1=C(C=CC(=C1)C[C@]2(CO[C@@H]([C@H]2CO)C3=CC(=C(C=C3)O)OC)O)O[C@H]4[C@@H]([C@H]([C@@H]([C@H](O4)CO)O)O)O	0.1		Lignans, neolignans and related compounds	Lignan glycosides		351967
5.23_281.1386m/z	Lactarorufin B	C15H22O5	5.22843	-3.03743	281.139	neg	M-H	182703	DBKIEMOKQWYZOA-UHFFFAOYSA-N	CC1(CC2C(C1)C(CC3=C(C2O)COC3=O)(C)O)CO	-0.5		Lipids and lipid-like molecules	Prenol lipids	Terpene lactones	344509
4.74_263.1385m/z	Phe Pro	C14H18N2O3	4.73788	-2.14883	263.138	pos	M+H	7020642	WEQJQNWXCSUVMA-RYUDHWBXSA-N	C1C[C@H](N(C1)C(=O)[C@H](CC2=CC=CC=C2)N)C(=O)O	-1.4		Organic acids and derivatives	Carboxylic acids and derivatives	Amino acids, peptides, and analogues	343640
8.55_257.0814m/z	2',4',6'-Trihydroxydihydrochalcone	C15H14O4	8.55238	-2.17529	257.081	neg	M-H	1226045	QWQGMMRHTWIOGH-UHFFFAOYSA-N	C1=CC=C(C=C1)CCC(=O)C2=C(C=C(C=C2O)O)O	3	C09618	Phenylpropanoids and polyketides	Linear 1,3-diarylpropanoids	Chalcones and dihydrochalcones	339996
4.46_318.2016m/z	Ser Val Leu	C14H27N3O5	4.45763	-2.31123	318.202	pos	M+H	145457935	YEDSOSIKVUMIJE-DCAQKATOSA-N	CC(C)C[C@@H](C(=O)O)NC(=O)[C@H](C(C)C)NC(=O)[C@H](CO)N	-2.3		Organic acids and derivatives	Carboxylic acids and derivatives	Amino acids, peptides, and analogues	330904
3.60_312.1295m/z	N2,N2-Dimethylguanosine	C12H17N5O5	3.60143	-2.51607	312.129	pos	M+H	135501639	RSPURTUNRHNVGF-IOSLPCCCSA-N	CN(C)C1=NC2=C(C(=O)N1)N=CN2[C@H]3[C@@H]([C@@H]([C@H](O3)CO)O)O	-1.3		Nucleosides, nucleotides, and analogues	Purine nucleosides		325558
7.06_163.0761m/z	Isoeugenol	C10H12O2	7.05685	-2.27488	163.076	neg	M-H	853433	BJIOGJUNALELMI-ONEGZZNKSA-N	C/C=C/C1=CC(=C(C=C1)O)OC	2.6	C10469	Benzenoids	Phenols	Methoxyphenols	312297
4.41_332.2172m/z	Val Thr Leu	C15H29N3O5	4.41345	-2.37852	332.217	pos	M+H	101986938	LCHZBEUVGAVMKS-RHYQMDGZSA-N	C[C@H]([C@@H](C(=O)N[C@@H](CC(C)C)C(=O)O)NC(=O)[C@H](C(C)C)N)O	-2		Organic acids and derivatives	Carboxylic acids and derivatives	Amino acids, peptides, and analogues	310639
4.74_149.0595m/z	(E)-Cinnamic acid	C9H8O2	4.73788	-1.69515	149.059	pos	M+H	444539	WBYWAXJHAXSJNI-VOTSOKGWSA-N	C1=CC=C(C=C1)/C=C/C(=O)O	2.1	C10438	Phenylpropanoids and polyketides	Cinnamic acids and derivatives	Cinnamic acids	303586
10.61_311.2207m/z	9-Oxo-12,13-Epoxy-10-Octadecenoic acid	C18H30O4	10.6101	-3.17293	311.221	pos	M+H	5283007	RCMABBHQYMBYKV-BUHFOSPRSA-N	CCCCCC1C(O1)/C=C/C(=O)CCCCCCCC(=O)O	4		Lipids and lipid-like molecules	Fatty Acyls	Fatty acids and conjugates	302614
5.16_344.2535m/z	Leu Val Leu	C17H33N3O4	5.1575	-2.49802	344.254	pos	M+H	11515702	FPPCCQGECVKLDY-IHRRRGAJSA-N	CC(C)C[C@@H](C(=O)N[C@@H](C(C)C)C(=O)N[C@@H](CC(C)C)C(=O)O)N	-1.6		Organic acids and derivatives	Carboxylic acids and derivatives	Amino acids, peptides, and analogues	295784
5.76_301.0336m/z	Isodemethylwedelolactone	C15H8O7	5.75683	-2.21423	301.034	pos	M+H	5318547	OBEHELRBTWMPHI-UHFFFAOYSA-N	C1=C(C=C(C2=C1C3=C(C4=CC(=C(C=C4O3)O)O)C(=O)O2)O)O	2.1		Phenylpropanoids and polyketides	Isoflavonoids	Coumestans	295729
0.85_174.1121m/z	swainsonine	C8H15NO3	0.848983	-1.88655	174.112	pos	M+H	51683	FXUAIOOAOAVCGD-WCTZXXKLSA-N	C1C[C@H]([C@@H]2[C@@H]([C@@H](CN2C1)O)O)O	-1.3	C10173	Organoheterocyclic compounds	Indolizidines		294084
2.93_295.1646m/z	Ile Tyr	C15H22N2O4	2.93335	-2.26329	295.165	pos	M+H	7408195	MUFXDFWAJSPHIQ-XDTLVQLUSA-N	CC[C@H](C)[C@@H](C(=O)N[C@@H](CC1=CC=C(C=C1)O)C(=O)O)N	-2.2		Organic acids and derivatives	Carboxylic acids and derivatives	Amino acids, peptides, and analogues	293800
6.43_133.1010m/z	Cumic alcohol	C10H14O	6.42505	-1.33619	133.101	pos	M+H-H2O	325	OIGWAXDAPKFNCQ-UHFFFAOYSA-N	CC(C)C1=CC=C(C=C1)CO	2.3	C06576	Lipids and lipid-like molecules	Prenol lipids	Monoterpenoids	284865
8.71_302.3046m/z	Sphinganine	C18H39NO2	8.70905	-2.35934	302.305	pos	M+H	91486	OTKJDMGTUTTYMP-ZWKOTPCHSA-N	CCCCCCCCCCCCCCC[C@H]([C@H](CO)N)O	5.8	C00836	Organic nitrogen compounds	Organonitrogen compounds	Amines	281650
9.23_328.2299m/z	Altrenogest	C21H26O2	9.23203	8.94887	328.23	pos	M+NH4									278701
4.40_345.2125m/z	Val Asn Ile	C15H28N4O5	4.40257	-2.21376	345.212	pos	M+H	145458953	VHRLUTIMTDOVCG-PEDHHIEDSA-N	CC[C@H](C)[C@@H](C(=O)N[C@@H]([C@@H](C)CC)C(=O)O)NC(=O)[C@H](C(C)C)N	-2.1		Organic acids and derivatives	Carboxylic acids and derivatives	Amino acids, peptides, and analogues	273067
1.92_298.1138m/z	3'-O-Methylguanosine	C11H15N5O5	1.92273	-2.67994	298.114	pos	M+H	135742509	UYARPHAXAJAZLU-KQYNXXCUSA-N	CO[C@@H]1[C@H](O[C@H]([C@@H]1O)N2C=NC3=C2N=C(NC3=O)N)CO	-1.9		Nucleosides, nucleotides, and analogues	Purine nucleosides		261181
3.55_294.1209n	Glu Phe	C14H18N2O5	3.55045	-2.26396	295.128	pos	M+H-H2O, M+H	19365626	XMBSYZWANAQXEV-UHFFFAOYSA-N	C1=CC=C(C=C1)CC(C(=O)O)NC(=O)C(CCC(=O)O)N	-3	C01425	Organic acids and derivatives	Carboxylic acids and derivatives	Amino acids, peptides, and analogues	260464
6.66_439.2294m/z	Thr Arg Tyr	C19H30N6O6	6.6587	-1.18485	439.229	pos	M+H									255970
8.67_211.1324m/z	Jasmonic acid	C12H18O3	8.67458	-2.04791	211.132	pos	M+H	5281166	ZNJFBWYDHIGLCU-HWKXXFMVSA-N	CC/C=C\C[C@@H]1[C@H](CCC1=O)CC(=O)O	1.6	C08491	Lipids and lipid-like molecules	Fatty Acyls	Lineolic acids and derivatives	255453
6.15_301.0336m/z	myricetin	C15H10O8	6.1472	-2.10564	301.034	pos	M+H-H2O	5281672	IKMDFBPHZNJCSN-UHFFFAOYSA-N	C1=C(C=C(C(=C1O)O)O)C2=C(C(=O)C3=C(C=C(C=C3O2)O)O)O	1.2	C10107	Phenylpropanoids and polyketides	Flavonoids	Flavones	252568
7.35_359.0765m/z	Jaceidin	C18H16O8	7.3489	-2.0693	359.076	neg	M-H	5464461	XUWTZJRCCPNNJR-UHFFFAOYSA-N	COC1=C(C=CC(=C1)C2=C(C(=O)C3=C(O2)C=C(C(=C3O)OC)O)OC)O	2.8		Phenylpropanoids and polyketides	Flavonoids	O-methylated flavonoids	249324
1.36_126.0315n	1,3,5-Trihydroxybenzene	C6H6O3	1.36178	-1.7858	144.065	pos	M+NH4, M+ACN+H	359	QCDYQQDYXPDABM-UHFFFAOYSA-N	C1=C(C=C(C=C1O)O)O	0.2	C02183	Benzenoids	Phenols	Benzenetriols and derivatives	246739
6.74_238.1928n	4(15)-Selinene-11,12-diol	C15H26O2	6.74138	-2.00886	221.19	pos	M+H-H2O, M+H									244941
7.60_233.1531m/z	Costunolide	C15H20O2	7.6033	-2.29773	233.153	pos	M+H	5281437	HRYLQFBHBWLLLL-AHNJNIBGSA-N	C/C/1=C\CC/C(=C/[C@@H]2[C@@H](CC1)C(=C)C(=O)O2)/C	2.1	C09382	Lipids and lipid-like molecules	Prenol lipids	Terpene lactones	239960
7.99_315.0504m/z	Rhamnetin	C16H12O7	7.99383	-1.89989	315.05	neg	M-H	5281691	JGUZGNYPMHHYRK-UHFFFAOYSA-N	COC1=CC(=C2C(=C1)OC(=C(C2=O)O)C3=CC(=C(C=C3)O)O)O	1.9	C10176	Phenylpropanoids and polyketides	Flavonoids	Flavones	225050
7.37_207.0648m/z	Scoparone	C11H10O4	7.36903	-2.0089	207.065	pos	M+H	8417	GUAFOGOEJLSQBT-UHFFFAOYSA-N	COC1=C(C=C2C(=C1)C=CC(=O)O2)OC	1.9	C09311	Phenylpropanoids and polyketides	Coumarins and derivatives		224183
0.84_146.0921m/z	4-Guanidinobutanoic acid	C5H11N3O2	0.840283	-2.31742	146.092	pos	M+H	500	TUHVEAJXIMEOSA-UHFFFAOYSA-N	C(CC(=O)O)CN=C(N)N	-1.5		Organic acids and derivatives	Carboxylic acids and derivatives	Amino acids, peptides, and analogues	220027
4.87_346.1964m/z	Asp Val Leu	C15H27N3O6	4.87192	-2.39953	346.196	pos	M+H	145454616	GIKOVDMXBAFXDF-NHCYSSNCSA-N	CC(C)C[C@@H](C(=O)O)NC(=O)[C@H](C(C)C)NC(=O)[C@H](CC(=O)O)N	-3.8		Organic acids and derivatives	Carboxylic acids and derivatives	Amino acids, peptides, and analogues	215530
6.44_243.1230m/z	4-Oxododecanedioic acid	C12H20O5	6.43565	-3.17996	243.123	neg	M-H	13213508	HHXMOTDTSDYYEI-UHFFFAOYSA-N	C(CCCC(=O)CCC(=O)O)CCCC(=O)O	1.1		Organic acids and derivatives	Keto acids and derivatives	Medium-chain keto acids and derivatives	213693
4.94_359.2279m/z	Ile Asn Ile	C16H30N4O5	4.9398	-2.7189	359.228	pos	M+H	145457149	KIEPQOIQHFKQLK-PCBIJLKTSA-N	CC[C@H](C)[C@@H](C(=O)O)NC(=O)[C@H](CC(=O)N)NC(=O)[C@H](CC1=CC=CC=C1)N	-2.9		Organic acids and derivatives	Carboxylic acids and derivatives	Amino acids, peptides, and analogues	212409
10.15_480.3076m/z	PC(15:1/0:0)	C23H46NO7P	10.1516	-1.7664	480.308	pos	M+H	24779458	RJZVWDTYEWCUAR-JOCHJYFZSA-N	CCCCCCCCCCCCCCC(=O)OC[C@H](COP(=O)([O-])OCC[N+](C)(C)C)O	5		Lipids and lipid-like molecules	Glycerophospholipids	Glycerophosphocholines	211965
0.82_360.1491m/z	-Gentiobiose	C12H22O11	0.821567	-2.78675	360.149	pos	M+NH4	441422	DLRVVLDZNNYCBX-LIZSDCNHSA-N	C([C@@H]1[C@H]([C@@H]([C@H]([C@@H](O1)OC[C@@H]2[C@H]([C@@H]([C@H]([C@@H](O2)O)O)O)O)O)O)O)O	-4.7	C08240	Organic oxygen compounds	Organooxygen compounds	Carbohydrates and carbohydrate conjugates	211331
2.63_223.1073m/z	Gly Phe	C11H14N2O3	2.62638	-2.08951	223.107	pos	M+H	6992304	GLUBLISJVJFHQS-VIFPVBQESA-N	C1=CC=C(C=C1)C[C@@H](C(=O)NCC(=O)O)N	-2.5		Organic acids and derivatives	Carboxylic acids and derivatives	Amino acids, peptides, and analogues	211296
6.22_99.0807m/z	2-Hexenal	C6H10O	6.21638	2.54059	99.0807	pos	M+H					C08497				205197
0.91_383.1183m/z	Quinic acid	C7H12O6	0.91045	-3.07894	383.118	neg	2M-H	6508	AAWZDTNXLSGCEK-LNVDRNJUSA-N	C1[C@H](C([C@@H](CC1(C(=O)O)O)O)O)O	-2.4	C00296	Organic oxygen compounds	Organooxygen compounds	Alcohols and polyols	204043
8.57_309.2064m/z	9S-Hydroperoxy-10E,12Z,15Z-octadecatrienoic acid	C18H30O4	8.57472	-2.47921	309.206	neg	M-H	6450029	RWKJTIHNYSIIHW-MEBVTJQTSA-N	CC/C=C\C/C=C\C=C\[C@H](CCCCCCCC(=O)O)OO	4.7		Lipids and lipid-like molecules	Fatty Acyls	Lineolic acids and derivatives	193515
4.78_330.2379m/z	Leu Val Val	C16H31N3O4	4.78375	-2.51762	330.238	pos	M+H	11559237	FTKXYXACXYOHND-XUXIUFHCSA-N	CC[C@H](C)[C@@H](C(=O)N[C@@H](CC(C)C)C(=O)O)NC(=O)[C@H](C(C)C)N	0		Organic acids and derivatives	Carboxylic acids and derivatives	Amino acids, peptides, and analogues	188895
10.95_313.2376m/z	9,10-Dihydroxy-12Z-octadecenoic acid	C18H34O4	10.9524	-2.53894	313.238	neg	M-H	9966640	XEBKSQSGNGRGDW-YFHOEESVSA-N	CCCCC/C=C\CC(C(CCCCCCCC(=O)O)O)O	4.6		Lipids and lipid-like molecules	Fatty Acyls	Fatty acids and conjugates	186683
7.02_297.0760m/z	5-O-Methylbiochanin A	C17H14O5	7.01782	-2.69387	297.076	neg	M-H	14308334	JQQULYXWXRNRAX-UHFFFAOYSA-N	COC1=CC=C(C=C1)C2=COC3=C(C2=O)C(=CC(=C3)O)OC	2.8		Phenylpropanoids and polyketides	Isoflavonoids	O-methylated isoflavonoids	183856
3.74_282.1190m/z	N6-Methyladenosine	C11H15N5O4	3.73987	-2.30331	282.119	pos	M+H	102175	VQAYFKKCNSOZKM-IOSLPCCCSA-N	CNC1=C2C(=NC=N1)N(C=N2)[C@H]3[C@@H]([C@@H]([C@H](O3)CO)O)O	-0.4		Nucleosides, nucleotides, and analogues	Purine nucleosides		178553
5.95_161.0594m/z	6-Methylcoumarin	C10H8O2	5.94685	-1.96934	161.059	pos	M+H	7092	FXFYOPQLGGEACP-UHFFFAOYSA-N	CC1=CC2=C(C=C1)OC(=O)C=C2	1.8		Phenylpropanoids and polyketides	Coumarins and derivatives		172654
8.37_221.1895m/z	Caryophyllene epoxide	C15H24O	8.3666	-2.23875	221.189	pos	M+H	14350	NVEQFIOZRFFVFW-UHFFFAOYSA-N	CC1(CC2C1CCC3(C(O3)CCC2=C)C)C	3.6	C16908	Lipids and lipid-like molecules	Prenol lipids	Sesquiterpenoids	171976
6.07_516.1258n	3,5-Di-O-caffeoylquinic acid	C25H24O12	6.06892	-1.89012	517.133	pos	M+H, M+Na	6474310	KRZBCHWVBQOTNZ-RDJMKVHDSA-N	C1C(C[C@H](C([C@@H]1OC(=O)/C=C/C2=CC(=C(C=C2)O)O)O)OC(=O)/C=C/C3=CC(=C(C=C3)O)O)(O)C(=O)O	1.5		Organic oxygen compounds	Organooxygen compounds	Alcohols and polyols	169316
7.83_303.1595m/z	2,6-dihydroxy-7-methoxy-1,1,4a-trimethyl-3,4,10,10a-tetrahydro-2H-phenanthren-9-one	C18H24O4	7.83223	-2.40858	303.159	neg	M-H									168164
6.40_135.1166m/z	Perilla alcohol	C10H16O	6.40278	-1.47049	135.117	pos	M+H-H2O	10819	NDTYTMIUWGWIMO-UHFFFAOYSA-N	CC(=C)C1CCC(=CC1)CO	2.1		Lipids and lipid-like molecules	Prenol lipids	Monoterpenoids	167590
0.84_160.0965m/z	Acetyl-Valine	C7H13NO3	0.840283	-2.05566	160.096	pos	M+H									165854
5.27_289.1176m/z	Honokiol	C18H18O2	5.2673	-8.56735	289.118	pos	M+Na	72303	FVYXIJYOAGAUQK-UHFFFAOYSA-N	C=CCC1=CC(=C(C=C1)O)C2=CC(=C(C=C2)O)CC=C	5	C10630	Benzenoids	Benzene and substituted derivatives	Biphenyls and derivatives	165506
3.97_280.1053n	Asp Phe	C13H16N2O5	3.96703	-2.28402	281.113	pos	M+H, M+Na									165391
8.27_248.1407n	1-Hydroxy-4(15),11(13)-eudesmadien-12,6-olide	C15H20O3	8.27448	-2.15154	249.148	pos	M+H, M+CH3OH+H									159478
5.39_369.1173m/z	3-O-Feruloylquinic acid	C17H20O9	5.3928	-1.94776	369.117	pos	M+H	9799386	RAGZUCNPTLULOL-KJJWLSQTSA-N	COC1=C(C=CC(=C1)/C=C/C(=O)O[C@@H]2C[C@@](C[C@H]([C@H]2O)O)(C(=O)O)O)O	-0.1	C02572	Organic oxygen compounds	Organooxygen compounds	Alcohols and polyols	158721
5.46_133.0646m/z	cinnamaldehyde	C9H8O	5.45875	-1.45893	133.065	pos	M+H	637511	KJPRLNWUNMBNBZ-QPJJXVBHSA-N	C1=CC=C(C=C1)/C=C/C=O	1.9	C00903	Phenylpropanoids and polyketides	Cinnamaldehydes		158115
5.53_360.2119m/z	Asp Ile Ile	C16H29N3O6	5.5345	-2.68238	360.212	pos	M+H	145454467	NHSDEZURHWEZPN-SXTJYALSSA-N	CC[C@H](C)[C@@H](C(=O)N[C@@H]([C@@H](C)CC)C(=O)O)NC(=O)[C@H](CC(=O)O)N	-3.3		Organic acids and derivatives	Carboxylic acids and derivatives	Amino acids, peptides, and analogues	153403
8.85_201.1634m/z	Alpha-Calacorene	C15H20	8.84733	-1.94323	201.163	pos	M+H	12302243	CUUMXRBKJIDIAY-ZDUSSCGKSA-N	CC1=CC[C@H](C2=C1C=CC(=C2)C)C(C)C	4.4		Lipids and lipid-like molecules	Prenol lipids	Sesquiterpenoids	152656
5.19_243.1333m/z	Glutamylleucine	C11H20N2O5	5.19045	-2.37703	243.133	pos	M+H-H2O	9856500	YBAFDPFAUTYYRW-YUMQZZPRSA-N	CC(C)C[C@@H](C(=O)O)NC(=O)[C@H](CCC(=O)O)N	-3.3		Organic acids and derivatives	Carboxylic acids and derivatives	Amino acids, peptides, and analogues	151571
11.60_365.2678m/z	1a,1b-dihomo PGF2Alpha	C22H38O5	11.6036	-2.24441	365.268	pos	M+H-H2O	6443812	ZCTAOAWRUXSOQF-GWSKAPOCSA-N	CCCCC[C@@H](/C=C/[C@H]1[C@@H](C[C@@H]([C@@H]1C/C=C\CCCCCC(=O)O)O)O)O	3.8		Lipids and lipid-like molecules	Fatty Acyls	Eicosanoids	150389
11.58_522.3543m/z	PC(18:1/0:0)	C26H52NO7P	11.5786	-2.06931	522.354	pos	M+H	16081932	YAMUFBLWGFFICM-PTGWMXDISA-N	CCCCCCCC/C=C\CCCCCCCC(=O)OC[C@H](COP(=O)([O-])OCC[N+](C)(C)C)O	5.7		Lipids and lipid-like molecules	Glycerophospholipids	Glycerophosphocholines	148100
7.55_345.0606m/z	5,7,3',4'-Tetrahydroxy-6,8-dimethoxyflavone	C17H14O8	7.54962	-2.86808	345.061	neg	M-H	5321859	GLMWHQIFJIURES-UHFFFAOYSA-N	COC1=C(C(=C2C(=C1O)C(=O)C=C(O2)C3=CC(=C(C=C3)O)O)OC)O	2.3	C04581	Phenylpropanoids and polyketides	Flavonoids	O-methylated flavonoids	147942
5.22_225.0763m/z	Ethyl syringate	C11H14O5	5.21757	-2.35332	225.076	neg	M-H	19845	WKUVKFZZCHINKG-UHFFFAOYSA-N	CCOC(=O)C1=CC(=C(C(=C1)OC)O)OC	1.7		Benzenoids	Benzene and substituted derivatives	Benzoic acids and derivatives	144148
6.09_191.0699m/z	6-Methoxy-4-methylcoumarin	C11H10O3	6.09282	-2.09148	191.07	pos	M+H	223821	KNGPIBWCWOQBEK-UHFFFAOYSA-N	CC1=CC(=O)OC2=C1C=C(C=C2)OC	2.2		Phenylpropanoids and polyketides	Coumarins and derivatives		140741
10.79_303.1583m/z	Nordihydroguaiaretic acid	C18H22O4	10.7931	-2.54267	303.158	pos	M+H	4534	HCZKYJDFEPMADG-UHFFFAOYSA-N	CC(CC1=CC(=C(C=C1)O)O)C(C)CC2=CC(=C(C=C2)O)O	4.3	C10719	Lignans, neolignans and related compounds	Dibenzylbutane lignans		135420
5.23_626.1471n	Quercetin-3,4'-O-di-beta-glucoside	C27H30O17	5.22565	-1.89696	627.154	pos	M+H, M+Na	22630387	RPVIQWDFJPYNJM-UHFFFAOYSA-N	C1=CC(=C(C=C1C2=C(C(=O)C3=C(C=C(C=C3O2)O)O)OC4C(C(C(C(O4)CO)O)O)O)O)OC5C(C(C(C(O5)CO)O)O)O	-1.4	C05623	Phenylpropanoids and polyketides	Flavonoids	Flavonoid glycosides	134666
5.76_242.1745m/z	1,2,4-Trideoxy-3-C-methyl-4-{[(2E,4E)-2-methyl-2,4-hexadienoyl]amino}pentitol	C13H23NO3	5.75683	-2.2095	242.175	pos	M+H									133241
6.30_461.0717m/z	Kaempferol 3-glucuronoside	C21H18O12	6.30258	-1.88778	461.072	neg	M-H	22846027	FNTJVYCFNVUBOL-MBIBTLSJSA-N	C1=CC(=CC=C1C2=C(C(=O)C3=C(C=C(C=C3O2)O)O)OC4[C@@H]([C@H]([C@@H]([C@H](O4)C(=O)O)O)O)O)O	1		Phenylpropanoids and polyketides	Flavonoids	Flavonoid glycosides	133048
0.89_348.0695m/z	3'-AMP	C10H14N5O7P	0.89425	-2.50979	348.069	pos	M+H	41211	LNQVTSROQXJCDD-KQYNXXCUSA-N	C1=NC(=C2C(=N1)N(C=N2)[C@H]3[C@@H]([C@@H]([C@H](O3)CO)OP(=O)(O)O)O)N	-2.7	C01367	Nucleosides, nucleotides, and analogues	Ribonucleoside 3'-phosphates		130443
6.43_323.1382m/z	Indole-3-acetyl-L-phenylalanine	C19H18N2O3	6.42505	-2.58382	323.138	pos	M+H	644227	BUGQHORRADGONS-KRWDZBQOSA-N	C1=CC=C(C=C1)C[C@@H](C(=O)O)NC(=O)CC2=CNC3=CC=CC=C32	2		Organic acids and derivatives	Carboxylic acids and derivatives	Amino acids, peptides, and analogues	128734
8.18_175.0396m/z	4-Methylumbelliferone	C10H8O3	8.18495	-2.50269	175.04	neg	M-H	5280567	HSHNITRMYYLLCV-UHFFFAOYSA-N	CC1=CC(=O)OC2=C1C=CC(=C2)O	1.9	C03081	Phenylpropanoids and polyketides	Coumarins and derivatives	Hydroxycoumarins	126938
6.55_168.1016m/z	p-Synephrine	C9H13NO2	6.54805	-2.03726	168.102	pos	M+H	7172	YRCWQPVGYLYSOX-UHFFFAOYSA-N	CNCC(C1=CC=C(C=C1)O)O	-0.6	C01869	Benzenoids	Phenols	1-hydroxy-2-unsubstituted benzenoids	124160
4.17_374.2277m/z	Ile Leu Glu	C17H31N3O6	4.16655	-2.26851	374.228	pos	M+H	145456189	HUORUFRRJHELPD-MNXVOIDGSA-N	CC[C@H](C)[C@@H](C(=O)N[C@@H](CC(C)C)C(=O)N[C@@H](CCC(=O)O)C(=O)O)N	-1.7		Organic acids and derivatives	Carboxylic acids and derivatives	Amino acids, peptides, and analogues	123695
11.77_365.2677m/z	16,16-dimethyl-PGE1	C22H38O5	11.7668	-2.37795	365.268	pos	M+H-H2O	5283058	RQOFITYRYPQNLL-ZWSAOQBFSA-N	CCCCC(C)(C)[C@@H](/C=C/[C@H]1[C@@H](CC(=O)[C@@H]1CCCCCCC(=O)O)O)O	4		Lipids and lipid-like molecules	Fatty Acyls	Eicosanoids	123305
6.82_311.1271m/z	15,16-Dihydrotanshinone I	C18H14O3	6.81825	-2.54853	311.127	pos	M+CH3OH+H	11425923	HARGZZNYNSYSGJ-JTQLQIEISA-N	C[C@H]1COC2=C1C(=O)C(=O)C3=C2C=CC4=C(C=CC=C43)C	3.2		Lipids and lipid-like molecules	Prenol lipids	Diterpenoids	116757
5.10_190.0495m/z	Kynurenic acid	C10H7NO3	5.09542	-1.93646	190.05	pos	M+H	3845	HCZHHEIFKROPDY-UHFFFAOYSA-N	C1=CC=C2C(=C1)C(=O)C=C(N2)C(=O)O	1.3	C01717	Organoheterocyclic compounds	Quinolines and derivatives	Quinoline carboxylic acids	116124
4.74_429.1327m/z	Morroniside	C17H26O11	4.73788	-9.89381	429.133	pos	M+Na	11228693	YTZSBJLNMIQROD-SFBCHFHNSA-N	C[C@H]1[C@@H]2[C@H](C[C@@H](O1)O)C(=CO[C@H]2O[C@H]3[C@@H]([C@H]([C@@H]([C@H](O3)CO)O)O)O)C(=O)OC	-1.8	C17000	Organic oxygen compounds	Organooxygen compounds	Carbohydrates and carbohydrate conjugates	112506
5.18_325.0911m/z	Skimmin	C15H16O8	5.17893	-1.99345	325.091	pos	M+H	99693	VPAOSFFTKWUGAD-TVKJYDDYSA-N	C1=CC(=CC2=C1C=CC(=O)O2)O[C@H]3[C@@H]([C@H]([C@@H]([C@H](O3)CO)O)O)O	-0.7		Phenylpropanoids and polyketides	Coumarins and derivatives	Coumarin glycosides	110551
10.14_474.2617m/z	PE(18:3/0:0)	C23H42NO7P	10.1425	-2.00421	474.262	neg	M-H	9547068	BBYWOYAFBUOUFP-JOCHJYFZSA-N	CCCCCCCCCCCCCCCCCC(=O)OC[C@H](COP(=O)(O)OCCN)O	3.4		Lipids and lipid-like molecules	Glycerophospholipids	Glycerophosphoethanolamines	110530
7.55_213.1127m/z	2,2'-(3-Methylcyclohexane-1,1-diyl)diacetic acid	C11H18O4	7.54962	-2.54241	213.113	neg	M-H	220370	HJPDHTDUPWGUHP-UHFFFAOYSA-N	CC1CCCC(C1)(CC(=O)O)CC(=O)O	2.1		Organic acids and derivatives	Carboxylic acids and derivatives	Dicarboxylic acids and derivatives	110187
6.75_353.1827n	4-(butan-2-yl)phenyl 2-(acetylamino)-2-deoxy-beta-D-glucopyranoside	C18H27NO6	6.75292	-3.1243	354.19	pos	M+H-H2O, M+H	16398230	NZLBBWKRFWAHOK-NTCFCCFRSA-N	CCC(C)C1=CC=C(C=C1)O[C@H]2[C@@H]([C@H]([C@@H]([C@H](O2)CO)O)O)NC(=O)C	1.8		Organic oxygen compounds	Organooxygen compounds	Carbohydrates and carbohydrate conjugates	110105
4.34_359.2279m/z	Gln Val Leu	C16H30N4O5	4.34452	-2.64717	359.228	pos	M+H	145455275	VEYGCDYMOXHJLS-GVXVVHGQSA-N	CC(C)C[C@@H](C(=O)O)NC(=O)[C@H](C(C)C)NC(=O)[C@H](CCC(=O)N)N	-4.1		Organic acids and derivatives	Carboxylic acids and derivatives	Amino acids, peptides, and analogues	108239
5.89_289.1540m/z	Indole-3-acetyl-L-leucine	C16H20N2O3	5.8911	-2.4074	289.154	pos	M+H	3945661	HCZNPUHZYPPINM-UHFFFAOYSA-N	CC(C)CC(C(=O)O)NC(=O)CC1=CNC2=CC=CC=C21	2.5		Organic acids and derivatives	Carboxylic acids and derivatives	Amino acids, peptides, and analogues	107697
5.05_410.1912m/z	Tyr Asp Ile	C19H27N3O7	5.05055	-2.3766	410.191	pos	M+H	145454476	RTXQQDVBACBSCW-CFMVVWHZSA-N	CC[C@H](C)[C@@H](C(=O)N[C@@H](CC1=CC=C(C=C1)O)C(=O)O)NC(=O)[C@H](CC(=O)O)N	-2.9		Organic acids and derivatives	Carboxylic acids and derivatives	Amino acids, peptides, and analogues	103697
5.69_507.1123m/z	Quercetin 3-(6-O-acetyl-beta-glucoside)	C23H22O13	5.68698	-2.0337	507.112	pos	M+H	10006384	IGLUNMMNDNWZOA-LNNZMUSMSA-N	CC(=O)OC[C@@H]1[C@H]([C@@H]([C@H]([C@@H](O1)OC2=C(OC3=CC(=CC(=C3C2=O)O)O)C4=CC(=C(C=C4)O)O)O)O)O	0.4		Phenylpropanoids and polyketides	Flavonoids	Flavonoid glycosides	102486
4.27_346.2329m/z	Ile Leu Thr	C16H31N3O5	4.26653	-2.23864	346.233	pos	M+H	145456197	PHRWFSFCNJPWRO-PPCPHDFISA-N	CC[C@H](C)[C@@H](C(=O)N[C@@H](CC(C)C)C(=O)N[C@@H]([C@@H](C)O)C(=O)O)N	-2.1		Organic acids and derivatives	Carboxylic acids and derivatives	Amino acids, peptides, and analogues	101035
1.34_267.0725m/z	Inosine	C10H12N4O5	1.34272	-3.79398	267.072	neg	M-H	135398641	UGQMRVRMYYASKQ-KQYNXXCUSA-N	C1=NC2=C(C(=O)N1)N=CN2[C@H]3[C@@H]([C@@H]([C@H](O3)CO)O)O	-1.3	C00294	Nucleosides, nucleotides, and analogues	Purine nucleosides		100888
6.37_160.0400m/z	2-Indolecarboxylic acid	C9H7NO2	6.3669	-2.73444	160.04	neg	M-H	72899	HCUARRIEZVDMPT-UHFFFAOYSA-N	C1=CC=C2C(=C1)C=C(N2)C(=O)O	2.3		Organoheterocyclic compounds	Indoles and derivatives	Indolecarboxylic acids and derivatives	95522.1
6.92_339.1228m/z	alpha-guaiaconic acid	C20H20O5	6.92015	-2.89214	339.123	neg	M-H	165795	OIXPKFRMEUTHOG-UHFFFAOYSA-N	CC1=C(OC(=C1C)C2=CC(=C(C=C2)O)OC)C3=CC(=C(C=C3)O)OC	4.3		Organoheterocyclic compounds	Furans	Diphenylfurans	93959.8
10.04_468.3074m/z	PC(14:0/0:0)	C22H46NO7P	10.0355	-2.31023	468.307	pos	M+H	24779456	JXGLGTFMAQOJBB-HEDKFQSOSA-N	CCCC/C=C\CCCCCCCC(=O)OC[C@H](COP(=O)([O-])OCC[N+](C)(C)C)O	3.5		Lipids and lipid-like molecules	Glycerophospholipids	Glycerophosphocholines	91543.7
1.07_211.0595m/z	7,8-Dihydroxycoumarin	C9H6O4	1.07498	-3.28826	211.06	pos	M+CH3OH+H	5280569	ATEFPOUAMCWAQS-UHFFFAOYSA-N	C1=CC(=C(C2=C1C=CC(=O)O2)O)O	1.2	C03093	Phenylpropanoids and polyketides	Coumarins and derivatives	Hydroxycoumarins	91501.6
1.54_293.0540m/z	1-Methylpseudouridine	C10H14N2O6	1.5421	-2.32785	293.054	neg	M+Cl	99543	UVBYMVOUBXYSFV-XUTVFYLZSA-N	CN1C=C(C(=O)NC1=O)[C@H]2[C@@H]([C@@H]([C@H](O2)CO)O)O	-2.6		Nucleosides, nucleotides, and analogues	Nucleoside and nucleotide analogues		91382
1.79_201.1240m/z	Alanylisoleucine	C9H18N2O3	1.78603	-2.51522	201.124	neg	M-H									91056.6
11.22_315.1932m/z	7-oxodehydroabietic acid	C20H26O3	11.2223	-7.23012	315.193	pos	M+H	29212	MSWJSDLNPCSSNW-MISYRCLQSA-N	CC(C)C1=CC2=C(C=C1)[C@]3(CCC[C@@]([C@@H]3CC2=O)(C)C(=O)O)C	4.5		Lipids and lipid-like molecules	Prenol lipids	Diterpenoids	89493.8
5.40_378.2378m/z	Val Leu Phe	C20H31N3O4	5.4035	-2.39486	378.238	pos	M+H	101750924	ZZGPVSZDZQRJQY-ULQDDVLXSA-N	CC(C)C[C@@H](C(=O)N[C@@H](CC1=CC=CC=C1)C(=O)O)NC(=O)[C@H](C(C)C)N	-1.3		Organic acids and derivatives	Carboxylic acids and derivatives	Amino acids, peptides, and analogues	86657.8
8.92_160.0521n	4-Methylcoumarin	C10H8O2	8.91708	-2.06434	193.086	pos	M+H, M+CH3OH+H	11833	PSGQCCSGKGJLRL-UHFFFAOYSA-N	CC1=CC(=O)OC2=CC=CC=C12	2.3		Phenylpropanoids and polyketides	Coumarins and derivatives		84273.8
2.36_122.0964m/z	Phenethylamine	C8H11N	2.36202	-0.248526	122.096	pos	M+H					C05332				83151.8
4.23_261.1438m/z	gamma-Glutamylleucine	C11H20N2O5	4.2333	-2.54579	261.144	pos	M+H	151023	MYFMARDICOWMQP-YUMQZZPRSA-N	CC(C)C[C@@H](C(=O)O)NC(=O)CC[C@@H](C(=O)O)N	-2.4		Organic acids and derivatives	Carboxylic acids and derivatives	Amino acids, peptides, and analogues	81332.3
11.16_452.2772m/z	PE(16:0/0:0)	C21H44NO7P	11.1572	-2.42875	452.277	neg	M-H	9547069	YVYMBNSKXOXSKW-HXUWFJFHSA-N	CCCCCCCCCCCCCCCC(=O)OC[C@H](COP(=O)(O)OCCN)O	2.4		Lipids and lipid-like molecules	Glycerophospholipids	Glycerophosphoethanolamines	78508.5
8.26_423.1289m/z	Campestrinoside	C20H24O10	8.25885	-1.79317	423.129	neg	M-H									76936.4
6.59_245.1379m/z	9-(2,3-Dihydroxypropoxy)-9-oxononanoic acid	C12H22O6	6.59313	-1.74935	245.138	pos	M+H-H2O	45783154	BQRISQXLSXCXSC-UHFFFAOYSA-N	C(CCCC(=O)O)CCCC(=O)OCC(CO)O	0.8		Lipids and lipid-like molecules	Fatty Acyls	Fatty acids and conjugates	75974.6
10.80_359.1116m/z	Gardenin B	C19H18O7	10.8045	-2.72598	359.112	pos	M+H	96539	LXEVSYZNYDZSOB-UHFFFAOYSA-N	COC1=CC=C(C=C1)C2=CC(=O)C3=C(C(=C(C(=C3O2)OC)OC)OC)O	3.3	C15109	Phenylpropanoids and polyketides	Flavonoids	O-methylated flavonoids	75900.1
4.43_339.0712m/z	Esculin	C15H16O9	4.4256	-2.78897	339.071	neg	M-H	5281417	XHCADAYNFIFUHF-TVKJYDDYSA-N	C1=CC(=O)OC2=CC(=C(C=C21)O[C@H]3[C@@H]([C@H]([C@@H]([C@H](O3)CO)O)O)O)O	-0.6	C09264	Phenylpropanoids and polyketides	Coumarins and derivatives	Coumarin glycosides	75528.6
15.03_218.0154m/z	Arecoline hydrobromide	C8H14BrNO2	15.0281	-9.03877	218.015	pos	M+H-H2O									74982.6
5.45_275.1383m/z	IAA-Val	C15H18N2O3	5.44825	-2.58177	275.138	pos	M+H	446641	AZEGJHGXTSUPPG-AWEZNQCLSA-N	CC(C)[C@@H](C(=O)O)NC(=O)CC1=CNC2=CC=CC=C21	2.1		Organic acids and derivatives	Carboxylic acids and derivatives	Amino acids, peptides, and analogues	72905.5
3.94_314.2068m/z	Pro Val Val	C15H27N3O4	3.94425	-2.07209	314.207	pos	M+H	15199694	FHJQROWZEJFZPO-SRVKXCTJSA-N	CC(C)[C@@H](C(=O)N[C@@H](C(C)C)C(=O)O)NC(=O)[C@@H]1CCCN1	-2.2		Organic acids and derivatives	Carboxylic acids and derivatives	Amino acids, peptides, and analogues	72614.1
3.18_149.0240m/z	3-Hydroxymandelic acid	C8H8O4	3.18133	-2.53531	149.024	neg	M-H2O-H	86957	OLSDAJRAVOVKLG-UHFFFAOYSA-N	C1=CC(=CC(=C1)O)C(C(=O)O)O	-0.1	C11527	Benzenoids	Phenols	1-hydroxy-4-unsubstituted benzenoids	69958.2
11.38_296.2577m/z	linolenic acid	C18H30O2	11.3811	-2.47055	296.258	pos	M+NH4	5280934	DTOSIQBPPRVQHS-PDBXOOCHSA-N	CC/C=C\C/C=C\C/C=C\CCCCCCCC(=O)O	5.9	C01595	Lipids and lipid-like molecules	Fatty Acyls	Lineolic acids and derivatives	68468.4
5.47_610.1523n	Kaempferol 3-O-gentiobioside	C27H30O16	5.46925	-1.75775	611.16	pos	M+H, M+Na	9960512	BITPRCODIALMOV-DEFKTLOSSA-N	C1=CC(=CC=C1C2=C(C(=O)C3=C(C=C(C=C3O2)O)O)O[C@H]4[C@@H]([C@H]([C@@H]([C@H](O4)CO[C@H]5[C@@H]([C@H]([C@@H]([C@H](O5)CO)O)O)O)O)O)O)O	-1.4		Phenylpropanoids and polyketides	Flavonoids	Flavonoid glycosides	64774.4
12.78_169.0140m/z	Gallic acid	C7H6O5	12.776	-1.45982	169.014	neg	M-H	370	LNTHITQWFMADLM-UHFFFAOYSA-N	C1=C(C=C(C(=C1O)O)O)C(=O)O	0.7	C01424	Benzenoids	Benzene and substituted derivatives	Benzoic acids and derivatives	64732.7
5.47_287.0543m/z	kaempferol	C15H10O6	5.46925	-2.38164	287.054	pos	M+H	5280863	IYRMWMYZSQPJKC-UHFFFAOYSA-N	C1=CC(=CC=C1C2=C(C(=O)C3=C(C=C(C=C3O2)O)O)O)O	1.9	C05903	Phenylpropanoids and polyketides	Flavonoids	Flavones	63477.3
13.41_271.2271m/z	2-hydroxyhexadecanoic acid	C16H32O3	13.4103	-2.77141	271.227	neg	M-H	92836	JGHSBPIZNUXPLA-UHFFFAOYSA-N	CCCCCCCCCCCCCCC(C(=O)O)O	6.4		Lipids and lipid-like molecules	Fatty Acyls	Fatty acids and conjugates	61150.7
10.53_249.1480m/z	Atractylenolide III	C15H20O3	10.525	-1.96416	249.148	pos	M+H	155948	FBMORZZOJSDNRQ-GLQYFDAESA-N	CC1=C2C[C@H]3C(=C)CCC[C@@]3(C[C@@]2(OC1=O)O)C	2.1	C17887	Lipids and lipid-like molecules	Prenol lipids	Terpene lactones	59359.7
5.17_244.0878n	biotin	C10H16N2O3S	5.16785	-1.49061	245.095	pos	M+H-H2O, M+H	171548	YBJHBAHKTGYVGT-ZKWXMUAHSA-N	C1[C@H]2[C@@H]([C@@H](S1)CCCCC(=O)O)NC(=O)N2	0.3	C00120	Organoheterocyclic compounds	Biotin and derivatives		58887.5
0.81_90.0553m/z	Alanine	C3H7NO2	0.8108	3.88351	90.0553	pos	M+H	602	QNAYBMKLOCPYGJ-UHFFFAOYSA-N	CC(C(=O)O)N	-3	C01401	Organic acids and derivatives	Carboxylic acids and derivatives	Amino acids, peptides, and analogues	58362.8
5.77_165.0543m/z	4-Hydroxycinnamic acid	C9H8O3	5.76893	-1.96814	165.054	pos	M+H	637542	NGSWKAQJJWESNS-ZZXKWVIFSA-N	C1=CC(=CC=C1/C=C/C(=O)O)O	1.5	C00811	Phenylpropanoids and polyketides	Cinnamic acids and derivatives	Hydroxycinnamic acids and derivatives	57521.9
11.53_219.1739m/z	Muurolladie-3-One	C15H22O	11.5287	-2.1023	219.174	pos	M+H	3989419	LMILVXQXGKTFSZ-UHFFFAOYSA-N	CC1=CCC(C2C1CC(=O)C(=C2)C)C(C)C	3.2		Lipids and lipid-like molecules	Prenol lipids	Sesquiterpenoids	56544.5
1.89_207.1125m/z	(S)-alpha-Amino-beta-phenylpropionicacid	C9H11NO2	1.89043	-1.71084	207.113	pos	M+ACN+H					C00079				53976.4
11.49_198.1041n	o-Methylbenzhydrol	C14H14O	11.4919	-2.07245	181.101	pos	M+H-H2O, M+H	95659	MXHXXJOHFRHBFB-UHFFFAOYSA-N	CC1=CC=CC=C1C(C2=CC=CC=C2)O	3.1		Benzenoids	Benzene and substituted derivatives	Diphenylmethanes	53611.7
7.01_138.0193m/z	2-Nitrophenol	C6H5NO3	7.00763	-2.38461	138.019	neg	M-H	6947	IQUPABOKLQSFBK-UHFFFAOYSA-N	C1=CC=C(C(=C1)[N+](=O)[O-])O	1.8	C01988	Benzenoids	Phenols	Nitrophenols	53565.2
0.88_208.9853m/z	Dehydroascorbic acid	C6H6O6	0.880417	-3.21876	208.985	neg	M+Cl	440667	SBJKKFFYIZUCET-JLAZNSOCSA-N	C([C@@H]([C@@H]1C(=O)C(=O)C(=O)O1)O)O	-1	C05422	Organoheterocyclic compounds	Lactones	Gamma butyrolactones	53045
6.49_357.1336m/z	Pinoresinol	C20H22O6	6.48685	-2.23956	357.134	neg	M-H	73399	HGXBRUKMWQGOIE-AFHBHXEDSA-N	COC1=C(C=CC(=C1)[C@@H]2[C@H]3CO[C@@H]([C@H]3CO2)C4=CC(=C(C=C4)O)OC)O	2.3	C05366	Lignans, neolignans and related compounds	Furanoid lignans		51385.2
4.38_222.0764m/z	Acetyl-Tyrosine	C11H13NO4	4.37607	-3.4315	222.076	neg	M-H	68310	CAHKINHBCWCHCF-JTQLQIEISA-N	CC(=O)N[C@@H](CC1=CC=C(C=C1)O)C(=O)O	-0.2		Organic acids and derivatives	Carboxylic acids and derivatives	Amino acids, peptides, and analogues	51124.6
10.61_482.3234m/z	PC(15:0/0:0)	C23H48NO7P	10.6101	-1.56104	482.323	pos	M+H	24779458	RJZVWDTYEWCUAR-JOCHJYFZSA-N	CCCCCCCCCCCCCCC(=O)OC[C@H](COP(=O)([O-])OCC[N+](C)(C)C)O	5		Lipids and lipid-like molecules	Glycerophospholipids	Glycerophosphocholines	50320.4
8.08_177.0542m/z	ferulic acid	C10H10O4	8.07818	-1.91609	177.054	pos	M+H-H2O	445858	KSEBMYQBYZTDHS-HWKANZROSA-N	COC1=C(C=CC(=C1)/C=C/C(=O)O)O	1.5	C01494	Phenylpropanoids and polyketides	Cinnamic acids and derivatives	Hydroxycinnamic acids and derivatives	47568.1
0.86_323.0277m/z	Uridine 5'-monophosphate	C9H13N2O9P	0.861783	-2.8557	323.028	neg	M-H	6030	DJJCXFVJDGTHFX-XVFCMESISA-N	C1=CN(C(=O)NC1=O)[C@H]2[C@@H]([C@@H]([C@H](O2)COP(=O)(O)O)O)O	-3.6	C00105	Nucleosides, nucleotides, and analogues	Pyrimidine nucleotides	Pyrimidine ribonucleotides	44857.8
5.71_303.1331m/z	(5R)-trans-1,7-diphenyl-5-hydroxy-6-hepten-3-one	C19H20O2	5.71025	-8.57766	303.133	pos	M+Na	13347321	NEQGOKAKPXXESR-ACCUITESSA-N	C1=CC=C(C=C1)CCC(=O)CC(/C=C/C2=CC=CC=C2)O	3.3		Phenylpropanoids and polyketides	Diarylheptanoids	Linear diarylheptanoids	44393.6
8.93_255.1584m/z	Gliocladic acid	C14H22O4	8.92902	-2.56588	255.158	pos	M+H	6439616	SLVSUVFUFJKMCV-MZGZCWAVSA-N	CC(C)[C@@H]1CCC(=C[C@H]1/C=C(\CO)/C(=O)O)CO	1.1		Lipids and lipid-like molecules	Prenol lipids	Monoterpenoids	44196.4
8.48_369.1324m/z	Isopsoralidin	C20H16O5	8.48395	-2.51488	369.132	pos	M+CH3OH+H	12304285	JWCDJOWFOVBBCP-UHFFFAOYSA-N	CC1(CCC2=CC3=C(C=C2O1)OC(=O)C4=C3OC5=C4C=CC(=C5)O)C	4.1		Phenylpropanoids and polyketides	Isoflavonoids	Coumestans	44051.2
0.71_132.0299m/z	L-aspartic acid	C4H7NO4	0.706783	-2.2517	132.03	neg	M-H	5960	CKLJMWTZIZZHCS-REOHCLBHSA-N	C([C@@H](C(=O)O)N)C(=O)O	-2.8	C00049	Organic acids and derivatives	Carboxylic acids and derivatives	Amino acids, peptides, and analogues	42544.1
4.53_293.1139m/z	Glutamylphenylalanine	C14H18N2O5	4.52912	-1.50468	293.114	neg	M-H	111299	XHHOHZPNYFQJKL-QWRGUYRKSA-N	C1=CC=C(C=C1)C[C@@H](C(=O)O)NC(=O)CC[C@@H](C(=O)O)N	-3		Organic acids and derivatives	Carboxylic acids and derivatives	Amino acids, peptides, and analogues	40794.8
7.91_331.0804m/z	3,7-Di-O-methylquercetin	C17H14O7	7.90968	-2.40999	331.08	pos	M+H	5280417	LUJAXSNNYBCFEE-UHFFFAOYSA-N	COC1=CC(=C2C(=C1)OC(=C(C2=O)OC)C3=CC(=C(C=C3)O)O)O	2.8	C01265	Phenylpropanoids and polyketides	Flavonoids	O-methylated flavonoids	40230.8
4.70_337.1017m/z	N-[4-(dimethylsulfamoyl)phenyl]-2-(4-fluorophenyl)acetamide	C16H17FN2O3S	4.6955	0.00232897	337.102	pos	M+H									39947.2
4.26_326.0993n	Melilotoside	C15H18O8	4.26128	-2.55402	325.092	neg	M-H, M+Cl	5280759	GVRIYIMNJGULCZ-ZMKUSUEASA-N	C1=CC=C(C(=C1)/C=C/C(=O)O)O[C@H]2[C@@H]([C@H]([C@@H]([C@H](O2)CO)O)O)O	-0.4		Organic oxygen compounds	Organooxygen compounds	Carbohydrates and carbohydrate conjugates	37107.6
14.79_192.1378m/z	N-Ethyl-N-Methylcathinone	C12H17NO	14.7949	-2.41443	192.138	pos	M+H	43794825	LOQPFJRCXJZNQV-UHFFFAOYSA-N	CCN(C)C(C)C(=O)C1=CC=CC=C1	2.4		Organic oxygen compounds	Organooxygen compounds	Carbonyl compounds	37023.8
4.67_225.0864m/z	Hydroxykynurenine	C10H12N2O4	4.6731	-2.47593	225.086	pos	M+H	89	VCKPUUFAIGNJHC-UHFFFAOYSA-N	C1=CC(=C(C(=C1)O)N)C(=O)CC(C(=O)O)N	-2.5	C02794	Organic oxygen compounds	Organooxygen compounds	Carbonyl compounds	36656.9
9.10_387.2269m/z	MDL 72832 HCL	C22H30N2O4	9.10157	-2.29669	387.227	pos	M+H									35975.9
10.10_247.1334m/z	5,9-dihydroxy-5,7,7-trimethyl-4,5a,6,8,8a,9-hexahydro-1H-azuleno[5,6-c]furan-3-one	C15H22O4	10.0972	-1.9485	247.133	neg	M-H2O-H	156145	MWDNWQAVYQDZQI-UHFFFAOYSA-N	CC1(CC2C(C1)C(CC3=C(C2O)C(OC3=O)O)(C)O)C	0.2		Lipids and lipid-like molecules	Prenol lipids	Terpene lactones	35957.8
6.14_247.1071m/z	N-Acetyl-tryptophan	C13H14N2O3	6.13697	-2.39291	247.107	pos	M+H	700653	DZTHIGRZJZPRDV-LBPRGKRZSA-N	CC(=O)N[C@@H](CC1=CNC2=CC=CC=C21)C(=O)O	1.1	C03137	Organic acids and derivatives	Carboxylic acids and derivatives	Amino acids, peptides, and analogues	34482.8
3.73_318.2016m/z	Ser Leu Val	C14H27N3O5	3.72937	-2.29113	318.202	pos	M+H	101769071	IXZHZUGGKLRHJD-DCAQKATOSA-N	CC(C)C[C@@H](C(=O)N[C@@H](C(C)C)C(=O)O)NC(=O)[C@H](CO)N	-2.3		Organic acids and derivatives	Carboxylic acids and derivatives	Amino acids, peptides, and analogues	33904.5
14.87_175.1186m/z	L-Arginine	C6H14N4O2	14.8731	-1.82563	175.119	pos	M+H	6322	ODKSFYDXXFIFQN-BYPYZUCNSA-N	C(C[C@@H](C(=O)O)N)CN=C(N)N	-4.2	C00062	Organic acids and derivatives	Carboxylic acids and derivatives	Amino acids, peptides, and analogues	31644
1.03_188.0560m/z	N-Acetyl-L-glutamic acid	C7H11NO5	1.02993	-2.54333	188.056	neg	M-H	70914	RFMMMVDNIPUKGG-YFKPBYRVSA-N	CC(=O)N[C@@H](CCC(=O)O)C(=O)O	-1.8	C00624	Organic acids and derivatives	Carboxylic acids and derivatives	Amino acids, peptides, and analogues	30742.9
0.72_147.0528n	L-glutamic acid	C5H9NO4	0.717533	-2.32084	146.046	neg	M-H, M+K-2H	33032	WHUUTDBJXJRKMK-VKHMYHEASA-N	C(CC(=O)O)[C@@H](C(=O)O)N	-3.7	C00025	Organic acids and derivatives	Carboxylic acids and derivatives	Amino acids, peptides, and analogues	30715.9
7.01_195.1012m/z	Methoxyeugenol	C11H14O3	7.01192	-1.69032	195.101	pos	M+H	226486	FWMPKHMKIJDEMJ-UHFFFAOYSA-N	COC1=CC(=CC(=C1O)OC)CC=C	2.6		Benzenoids	Phenols	Methoxyphenols	30448.5
9.59_177.0543m/z	Monoethyl phthalate	C10H10O4	9.5857	-1.74231	177.054	pos	M+H-H2O	75318	YWWHKOHZGJFMIE-UHFFFAOYSA-N	CCOC(=O)C1=CC=CC=C1C(=O)O	1.8		Benzenoids	Benzene and substituted derivatives	Benzoic acids and derivatives	30433.9
10.08_170.0727n	2-Hyroxybiphenyl	C12H10O	10.0821	-2.9801	171.08	pos	M+H, M+ACN+H, M+H-H2O					C02499				29888.5
9.80_299.1998m/z	14-Deoxyandrographolide	C20H30O4	9.79925	-2.21486	299.2	pos	M+H-2H2O	11624161	GVRNTWSGBWPJGS-YSDSKTICSA-N	C[C@@]12CC[C@H]([C@@]([C@H]1CCC(=C)[C@H]2CCC3=CCOC3=O)(C)CO)O	3.4		Lipids and lipid-like molecules	Prenol lipids	Terpene lactones	29626
5.47_449.1073m/z	Luteolin 4'-glucoside	C21H20O11	5.46925	-1.19107	449.107	pos	M+H	12304737	UHNXUSWGOJMEFO-UHFFFAOYSA-N	C1=CC(=C(C=C1C2=CC(=O)C3=C(C=C(C=C3O2)O)O)O)OC4C(C(C(C(O4)CO)O)O)O	0.5		Phenylpropanoids and polyketides	Flavonoids	Flavonoid glycosides	28560.8
0.77_118.0507m/z	Threonine	C4H9NO3	0.765683	-2.41894	118.051	neg	M-H	6288	AYFVYJQAPQTCCC-GBXIJSLDSA-N	C[C@H]([C@@H](C(=O)O)N)O	-2.9	C00188	Organic acids and derivatives	Carboxylic acids and derivatives	Amino acids, peptides, and analogues	26427.4
10.77_277.2163m/z	13-Hydroxy-9Z,11E-octadecadienoic acid	C18H32O3	10.7738	-3.32933	277.216	neg	M-H2O-H	5282947	HNICUWMFWZBIFP-BSZOFBHHSA-N	CCCCCC(/C=C/C=C\CCCCCCCC(=O)O)O	5.3	C04056	Lipids and lipid-like molecules	Fatty Acyls	Lineolic acids and derivatives	25297.5
4.98_251.1385m/z	Feruloyl allylamine	C13H15NO3	4.9849	-2.11476	251.139	pos	M+NH4	139291976	NAYMCRXFMBIDTH-FNORWQNLSA-N	COC1=C(C=CC(=C1)/C=C/C(=O)NCC=C)O	1.9					24412.9
4.47_160.1329m/z	DL-2-Aminooctanoic acid	C8H17NO2	4.46777	-1.66601	160.133	pos	M+H	69522	AKVBCGQVQXPRLD-UHFFFAOYSA-N	CCCCCCC(C(=O)O)N	-0.5		Organic acids and derivatives	Carboxylic acids and derivatives	Amino acids, peptides, and analogues	24281.1
5.36_206.0808m/z	Indolelactic acid	C11H11NO3	5.35922	-1.70684	206.081	pos	M+H	92904	XGILAAMKEQUXLS-UHFFFAOYSA-N	C1=CC=C2C(=C1)C(=CN2)CC(C(=O)O)O	1.5		Organoheterocyclic compounds	Indoles and derivatives	Indolyl carboxylic acids and derivatives	22792.6
7.92_137.1322m/z	beta-Myrcene	C10H16	7.92032	-2.11185	137.132	pos	M+H	31253	UAHWPYUMFXYFJY-UHFFFAOYSA-N	CC(=CCCC(=C)C=C)C	4.3	C06074	Lipids and lipid-like molecules	Prenol lipids	Monoterpenoids	21131.3
14.78_311.1256m/z	Cl-Amidine	C14H19ClN4O2	14.7823	-4.40048	311.126	pos	M+H					C06060				20853.2
7.79_247.1334m/z	Pechueloic Acid	C15H20O3	7.79167	-2.40411	247.133	neg	M-H	24094149	ZFHSKBJBODQVBX-AXTRIDKLSA-N	C[C@H]1CC[C@H](CC2=C(C(=O)C[C@@H]12)C)C(=C)C(=O)O	2.4		Lipids and lipid-like molecules	Prenol lipids	Sesquiterpenoids	20744.5
7.17_327.1220m/z	7-Acetoxy-2-methylisoflavone	C18H14O4	7.17002	-2.53229	327.122	pos	M+CH3OH+H									19274
4.70_401.1069m/z	4-(4-chlorophenoxy)-N-[5-methyl-4-(4-methylphenyl)-1,3-thiazol-2-yl]butanamide	C21H21ClN2O2S	4.6955	-4.00735	401.107	pos	M+H									19211.8
5.14_427.1590m/z	N-methyl-N-(2-(pyridin-2-yl)ethyl)-2-(2,3,5-trimethyl-7-oxo-7H-furo[3,2-g]chromen-6-yl)acetamide	C24H24N2O4	5.13593	-9.58635	427.159	pos	M+Na									19107.8
9.34_287.1385m/z	(2-methoxyphenyl)-[2-(5-methyl-1,2-oxazol-3-yl)pyrrolidin-1-yl]methanone	C16H18N2O3	9.33643	-1.76233	287.139	pos	M+H									19097
10.60_451.2832m/z	Celastrol	C29H38O4	10.5979	-2.32685	451.283	pos	M+H	122724	KQJSQWZMSAGSHN-JJWQIEBTSA-N	CC1=C(C(=O)C=C2C1=CC=C3[C@]2(CC[C@@]4([C@@]3(CC[C@@]5([C@H]4C[C@](CC5)(C)C(=O)O)C)C)C)C)O	5.9		Lipids and lipid-like molecules	Prenol lipids	Triterpenoids	19091.1
4.66_182.0455m/z	4-Pyridoxic acid	C8H9NO4	4.65563	-2.28415	182.045	neg	M-H	6723	HXACOUQIXZGNBF-UHFFFAOYSA-N	CC1=NC=C(C(=C1O)C(=O)O)CO	0.1	C00847	Organoheterocyclic compounds	Pyridines and derivatives	Pyridinecarboxylic acids and derivatives	18980.3
4.59_341.1376m/z	Clemaphenol A	C20H22O6	4.59303	-2.12413	341.138	pos	M+H-H2O	46173999	VRHZMFGDDGFRLP-AFHBHXEDSA-N	COC1=C(C=C(C=C1)[C@@H]2[C@H]3CO[C@@H]([C@H]3CO2)C4=CC(=C(C=C4)OC)O)O	2.3	C17808	Lignans, neolignans and related compounds	Furanoid lignans		18566.7
5.29_447.0922m/z	Isoorientin	C21H20O11	5.28958	-2.32403	447.092	neg	M-H	114776	ODBRNZZJSYPIDI-VJXVFPJBSA-N	C1=CC(=C(C=C1C2=CC(=O)C3=C(O2)C=C(C(=C3O)[C@H]4[C@@H]([C@H]([C@@H]([C@H](O4)CO)O)O)O)O)O)O	-0.2	C01821	Phenylpropanoids and polyketides	Flavonoids	Flavonoid glycosides	18174.5
8.31_261.1115m/z	7-O-Prenylscopoletin	C15H16O4	8.30978	-2.28276	261.112	pos	M+H	1764914	ZLPLFUBVEZVYDX-UHFFFAOYSA-N	CC(=CCOC1=C(C=C2C=CC(=O)OC2=C1)OC)C	3.4		Phenylpropanoids and polyketides	Coumarins and derivatives		17781.2
10.39_263.2363m/z	Farnesyl acetone	C18H30O	10.3907	-2.33539	263.236	pos	M+H	1711945	LTUMRKDLVGQMJU-IUBLYSDUSA-N	CC(=CCC/C(=C/CC/C(=C/CCC(=O)C)/C)/C)C	5.6		Lipids and lipid-like molecules	Prenol lipids	Diterpenoids	16820.2
7.86_353.1373m/z	Corylin	C20H16O4	7.86372	-3.1972	353.137	pos	M+CH3OH+H	5316097	PWAACAMQKVIVPZ-UHFFFAOYSA-N	CC1(C=CC2=C(O1)C=CC(=C2)C3=COC4=C(C3=O)C=CC(=C4)O)C	3.7		Phenylpropanoids and polyketides	Isoflavonoids	Pyranoisoflavonoids	16035
9.67_193.0492m/z	scopoletin	C10H8O4	9.66895	-1.72739	193.049	pos	M+H	5280460	RODXRVNMMDRFIK-UHFFFAOYSA-N	COC1=C(C=C2C(=C1)C=CC(=O)O2)O	1.5	C01752	Phenylpropanoids and polyketides	Coumarins and derivatives	Hydroxycoumarins	14550
12.48_205.1947m/z	gamma-Cadinene	C15H24	12.4766	-2.08135	205.195	pos	M+H	92313	WRHGORWNJGOVQY-RBSFLKMASA-N	CC1=C[C@H]2[C@H](CC1)C(=C)CC[C@@H]2C(C)C	4.3	C19738	Lipids and lipid-like molecules	Prenol lipids	Sesquiterpenoids	13665.3
5.81_397.1487m/z	[3-[2-(4-fluoroanilino)pyrimidin-4-yl]piperidin-1-yl]-(5-methylthiophen-2-yl)methanone	C21H21FN4OS	5.81235	-1.48132	397.149	pos	M+H									13420
0.90_187.0720m/z	NAlpha-Acetyl-L-glutamine	C7H12N2O4	0.899833	-2.51338	187.072	neg	M-H	182230	KSMRODHGGIIXDV-YFKPBYRVSA-N	CC(=O)N[C@@H](CCC(=O)N)C(=O)O	-1.4		Organic acids and derivatives	Carboxylic acids and derivatives	Amino acids, peptides, and analogues	10896.2
10.08_158.0729n	1-Naphthylmethanol	C11H10O	10.0821	-1.9841	141.07	pos	M+H-H2O, M+H									10166.9
7.99_339.1218m/z	Coniferyl ferulate	C20H20O6	7.99103	-2.56014	339.122	pos	M+H-H2O					C17855				9077.69
5.67_433.1126m/z	Vitexin	C21H20O10	5.66643	-0.732791	433.113	pos	M+H	5280441	SGEWCQFRYRRZDC-VPRICQMDSA-N	C1=CC(=CC=C1C2=CC(=O)C3=C(O2)C(=C(C=C3O)O)[C@H]4[C@@H]([C@H]([C@@H]([C@H](O4)CO)O)O)O)O	0.2	C01460	Phenylpropanoids and polyketides	Flavonoids	Flavonoid glycosides	8483.89
7.32_492.2431m/z	N-cyclohexyl-4-[4-(1,2-dihydroacenaphthylen-3-ylsulfonyl)piperazin-1-yl]-6-methylpyrimidin-2-amine	C27H33N5O2S	7.32263	0.693174	492.243	pos	M+H									7837.37
6.38_306.1362m/z	Brevicarine	C17H21N3	6.37967	-1.89249	306.136	pos	M+K	5490034	OMGIBPZQATWNBX-UHFFFAOYSA-N	CC1=NC=C(C2=C1NC3=CC=CC=C32)CCCCNC	3.3		Alkaloids and derivatives	Harmala alkaloids		7738.68
4.13_382.1712m/z	Trans-Zeatin-o-glucoside	C16H23N5O6	4.1318	-2.51039	382.171	pos	M+H	5461146	UUPDCCPAOMDMPT-HNVSNYHQSA-N	C/C(=C\CNC1=NC=NC2=C1NC=N2)/CO[C@H]3[C@@H]([C@H]([C@@H]([C@H](O3)CO)O)O)O	-0.9	C03423	Lipids and lipid-like molecules	Fatty Acyls	Fatty acyl glycosides	7332.51
16.64_99.0449m/z	Tiglic acid	C5H8O2	16.6389	-2.16172	99.0449	neg	M-H	125468	UIERETOOQGIECD-ONEGZZNKSA-N	C/C=C(\C)/C(=O)O	1	C08279	Lipids and lipid-like molecules	Fatty Acyls	Fatty acids and conjugates	6815.19
6.31_345.1465m/z	[4-(4-chlorophenyl)piperazin-1-yl]-(5,6,7,8-tetrahydroimidazo[1,2-a]pyridin-2-yl)methanone	C18H21ClN4O	6.31398	-3.29401	345.147	pos	M+H									5619.49
7.89_329.0659m/z	3,6-Dimethoxyapigenin	C17H14O7	7.88715	-2.33255	329.066	neg	M-H									5529.51
6.35_147.0449m/z	3-Isochromanone	C9H8O2	6.35462	-2.03498	147.045	neg	M-H					C07728				3831.04
6.82_593.1854m/z	Acaciin	C28H32O14	6.81825	-1.88757	593.185	pos	M+H	5317025	YFVGIJBUXMQFOF-PJOVQGMDSA-N	C[C@H]1[C@@H]([C@H]([C@H]([C@@H](O1)OC[C@@H]2[C@H]([C@@H]([C@H]([C@@H](O2)OC3=CC(=C4C(=C3)OC(=CC4=O)C5=CC=C(C=C5)OC)O)O)O)O)O)O)O	-0.5		Phenylpropanoids and polyketides	Flavonoids	Flavonoid glycosides	1643.82
4.78_148.9522m/z	Trifluoromethanesulfonic acid	CHF3O3S	4.78298	-2.68289	148.952	neg	M-H									618.247
7.53_269.0812m/z	2',5'-Dihydroxy-4-methoxychalcone	C16H14O4	7.52822	-2.64447	269.081	neg	M-H									473.538
8.13_333.2063m/z	5(S)-HpEPE	C20H30O4	8.13115	-2.5685	333.206	neg	M-H	5283184	NKXYOIJDQPQELO-GHWNLOBHSA-N	CC/C=C\C/C=C\C/C=C\C/C=C\C=C\[C@H](CCCC(=O)O)OO	4.6		Lipids and lipid-like molecules	Fatty Acyls	Eicosanoids	14.6836
5.10_581.1490m/z	4-(3,4-Dihydroxyphenyl)-7-hydroxy-2-oxo-2H-chromen-5-yl 6-O-D-xylopyranosyl-beta-D-glucopyranoside	C26H28O15	5.09542	-1.84828	581.149	pos	M+H									0
5.60_401.1081m/z	Gentiopicroside	C16H20O9	5.59642	-2.32703	401.108	neg	M+FA-H	88708	DUAGQYUORDTXOR-GPQRQXLASA-N	C=C[C@H]1[C@@H](OC=C2C1=CCOC2=O)O[C@H]3[C@@H]([C@H]([C@@H]([C@H](O3)CO)O)O)O	-1.2	C09782	Organic oxygen compounds	Organooxygen compounds	Carbohydrates and carbohydrate conjugates	0
5.19_565.1554m/z	Corymboside	C26H28O14	5.19045	0.300749	565.155	pos	M+H	13644660	OVMFOVNOXASTPA-UHFFFAOYSA-N	C1C(C(C(C(O1)C2=C(C(=C3C(=C2O)C(=O)C=C(O3)C4=CC=C(C=C4)O)C5C(C(C(C(O5)CO)O)O)O)O)O)O)O	-2.2		Phenylpropanoids and polyketides	Flavonoids	Flavonoid glycosides	0
5.65_431.0972m/z	Saponaretin	C21H20O10	5.64888	-2.63019	431.097	neg	M-H					C01714				0
5.35_463.1227m/z	Swertiajaponin	C22H22O11	5.34753	-1.63817	463.123	pos	M+H	442659	DLVLXOYLQKCAME-DGHBBABESA-N	COC1=C(C(=C2C(=C1)OC(=CC2=O)C3=CC(=C(C=C3)O)O)O)[C@H]4[C@@H]([C@H]([C@@H]([C@H](O4)CO)O)O)O	0.2	C10187	Phenylpropanoids and polyketides	Flavonoids	Flavonoid glycosides	0
6.81_283.0604m/z	Glycitein	C16H12O5	6.81237	-2.69205	283.06	neg	M-H	5317750	DXYUAIFZCFRPTH-UHFFFAOYSA-N	COC1=C(C=C2C(=C1)C(=O)C(=CO2)C3=CC=C(C=C3)O)O	2.4	C14536	Phenylpropanoids and polyketides	Isoflavonoids	Isoflav-2-enes	0
6.82_285.0750m/z	Genkwanin	C16H12O5	6.81825	-2.57415	285.075	pos	M+H	5281617	JPMYFOBNRRGFNO-UHFFFAOYSA-N	COC1=CC(=C2C(=C1)OC(=CC2=O)C3=CC=C(C=C3)O)O	2.1	C10046	Phenylpropanoids and polyketides	Flavonoids	O-methylated flavonoids	0

## Sheet: Fig5 Leaf
ID	Metabolite	Formula	Retention time(min)	Mass Error (ppm)	m/z	Mode	Adducts	Pubchem_ID	InChiKeys	SMILES	xlogp	KEGG	classA	classB	classC	NXJY
6.88_172.0730n	1,4-Cyclohexanedicarboxylic acid	C8H12O4	6.87993	-3.03508	171.066	neg	M-H, 2M-H	14106	PXGZQGDTEZPERC-UHFFFAOYSA-N	C1CC(CCC1C(=O)O)C(=O)O	0.5		Organic acids and derivatives	Carboxylic acids and derivatives	Dicarboxylic acids and derivatives	3.42577e+08
5.34_480.0892n	Gossypin	C21H20O13	5.33662	-2.42722	481.097	pos	M+H, M+Na					C10051				5.24101e+07
1.43_268.1033m/z	Adenosine	C10H13N5O4	1.43417	-2.91788	268.103	pos	M+H	60961	OIRDTQYFTABQOQ-KQYNXXCUSA-N	C1=NC(=C2C(=N1)N(C=N2)[C@H]3[C@@H]([C@@H]([C@H](O3)CO)O)O)N	-1.1	C00212	Nucleosides, nucleotides, and analogues	Purine nucleosides		4.47887e+07
0.79_377.0845m/z	Trehalose	C12H22O11	0.793683	-3.23365	377.085	neg	M+Cl	7427	HDTRYLNUVZCQOY-LIZSDCNHSA-N	C([C@@H]1[C@H]([C@@H]([C@H]([C@H](O1)O[C@@H]2[C@@H]([C@H]([C@@H]([C@H](O2)CO)O)O)O)O)O)O)O	-4.2	C01083	Organic oxygen compounds	Organooxygen compounds	Carbohydrates and carbohydrate conjugates	3.74048e+07
6.40_196.1095n	Loliolide	C11H16O3	6.40278	-2.16399	197.117	pos	M+H-H2O, M+H, M+ACN+H, M+H-2H2O	100332	XEVQXKKKAVVSMW-WRWORJQWSA-N	C[C@@]12C[C@H](CC(C1=CC(=O)O2)(C)C)O	1		Organoheterocyclic compounds	Benzofurans		2.43927e+07
6.17_516.1256n	3,4-Dicaffeoylquinic acid	C25H24O12	6.16993	-2.32534	515.118	neg	M-2H, M-H	5281780	UFCLZKMFXSILNL-PSEXTPKNSA-N	C1[C@H]([C@H]([C@@H](C[C@@]1(C(=O)O)O)OC(=O)/C=C/C2=CC(=C(C=C2)O)O)OC(=O)/C=C/C3=CC(=C(C=C3)O)O)O	1.5		Organic oxygen compounds	Organooxygen compounds	Alcohols and polyols	2.14387e+07
8.06_330.2398n	9S,10S,11R-trihydroxy-12Z-octadecenoic acid	C18H34O5	8.0575	-2.41644	329.233	neg	M-H, 2M-H, M+Cl	16061050	JHGVFGJXFVIYSM-BSHMHQBXSA-N	CCCCC/C=C\[C@H]([C@H]([C@H](CCCCCCCC(=O)O)O)O)O	3.5		Lipids and lipid-like molecules	Fatty Acyls	Fatty acids and conjugates	2.09876e+07
1.03_243.0629m/z	Uridine	C9H12N2O6	1.02993	2.73513	243.063	neg	M-H	6029	DRTQHJPVMGBUCF-XVFCMESISA-N	C1=CN(C(=O)NC1=O)[C@H]2[C@@H]([C@@H]([C@H](O2)CO)O)O	-2	C00299	Nucleosides, nucleotides, and analogues	Pyrimidine nucleosides		1.8301e+07
6.07_516.1257n	Isochlorogenic acid A	C25H24O12	6.0677	-2.17	515.118	neg	M-2H, M-H	6474310	KRZBCHWVBQOTNZ-RDJMKVHDSA-N	C1C(C[C@H](C([C@@H]1OC(=O)/C=C/C2=CC(=C(C=C2)O)O)O)OC(=O)/C=C/C3=CC(=C(C=C3)O)O)(O)C(=O)O	1.5	C10468	Organic oxygen compounds	Organooxygen compounds	Alcohols and polyols	1.81123e+07
3.66_360.1047n	1-O-(3-Hydroxy-4,5-dimethoxybenzoyl)hexopyranose	C15H20O10	3.65662	-2.58236	359.097	neg	M-H, M+Cl									1.79568e+07
4.66_354.0942n	Cyclohexanecarboxylic acid	C16H18O9	4.66087	-2.61987	355.101	pos	M+H-H2O, M+H, M+K, M+Na, 2M+Na, M+NH4	7413	NZNMSOFKMUBTKW-UHFFFAOYSA-N	C1CCC(CC1)C(=O)O	1.9	C09822	Organic acids and derivatives	Carboxylic acids and derivatives	Carboxylic acids	1.65082e+07
1.20_118.0262n	Succinic acid	C4H6O4	1.2041	-3.74453	117.019	neg	M-H, M+Cl, M-H2O-H	1110	KDYFGRWQOYBRFD-UHFFFAOYSA-N	C(CC(=O)O)C(=O)O	-0.6	C00042	Organic acids and derivatives	Carboxylic acids and derivatives	Dicarboxylic acids and derivatives	1.54897e+07
5.72_465.1018m/z	Spiraeoside	C21H20O12	5.72168	-2.04774	465.102	pos	M+H	5320844	OIUBYZLTFSLSBY-HMGRVEAOSA-N	C1=CC(=C(C=C1C2=C(C(=O)C3=C(C=C(C=C3O2)O)O)O)O)O[C@H]4[C@@H]([C@H]([C@@H]([C@H](O4)CO)O)O)O	0.4		Phenylpropanoids and polyketides	Flavonoids	Flavonoid glycosides	1.53472e+07
8.41_361.0906m/z	5,7,3'-Trihydroxy-6,4',5'-trimethoxyflavone	C18H16O8	8.41495	-3.21578	361.091	pos	M+H	5496475	PMBOOVZSTMWOFS-UHFFFAOYSA-N	COC1=CC(=CC(=C1OC)O)C2=CC(=O)C3=C(O2)C=C(C(=C3O)OC)O	2.6	C04552	Phenylpropanoids and polyketides	Flavonoids	O-methylated flavonoids	1.50614e+07
0.79_342.1151n	α，β-Trehalose	C12H22O11	0.789917	-3.30083	381.078	pos	M+K, 2M+K, M+Na	10871590	HDTRYLNUVZCQOY-BTLHAWITSA-N	C([C@@H]1[C@H]([C@@H]([C@H]([C@H](O1)O[C@H]2[C@@H]([C@H]([C@@H]([C@H](O2)CO)O)O)O)O)O)O)O	-4.2	C01083	Organic oxygen compounds	Organooxygen compounds	Carbohydrates and carbohydrate conjugates	1.23057e+07
3.64_203.0820m/z	D-Tryptophan	C11H12N2O2	3.63682	-2.73271	203.082	neg	M-H	9060	QIVBCDIJIAJPQS-SECBINFHSA-N	C1=CC=C2C(=C1)C(=CN2)C[C@H](C(=O)O)N	-1.1	C00525	Organoheterocyclic compounds	Indoles and derivatives	Indolyl carboxylic acids and derivatives	1.17256e+07
5.35_959.1720m/z	Myricetin-3-O-galactoside	C21H20O13	5.35247	-1.56168	959.172	neg	2M-H	5491408	FOHXFLPXBUAOJM-MGMURXEASA-N	C1=C(C=C(C(=C1O)O)O)C2=C(C(=O)C3=C(C=C(C=C3O2)O)O)O[C@H]4[C@@H]([C@H]([C@H]([C@H](O4)CO)O)O)O	0		Phenylpropanoids and polyketides	Flavonoids	Flavonoid glycosides	1.09923e+07
5.97_495.1122m/z	Laricitrin 3-galactoside	C22H22O13	5.97053	-2.22778	495.112	pos	M+H									1.06057e+07
8.85_180.1146n	Dihydroactinidiolide	C11H16O2	8.84733	-2.51107	181.122	pos	M+H, M+ACN+H, M+H-H2O, M+H-2H2O	27209	IMKHDCBNRDRUEB-UHFFFAOYSA-N	CC1(CCCC2(C1=CC(=O)O2)C)C	2.2		Organoheterocyclic compounds	Benzofurans		1.00977e+07
3.04_153.1271m/z	(R)-Camphor	C10H16O	3.04152	-2.09831	153.127	pos	M+H	159055	DSSYKIVIOFKYAU-XCBNKYQSSA-N	C[C@@]12CC[C@@H](C1(C)C)CC2=O	2.2	C00808	Lipids and lipid-like molecules	Prenol lipids	Monoterpenoids	9.81976e+06
7.04_428.1669n	1-[3-[(4-fluorophenyl)methyl]-4-oxothieno[3,2-d]pyrimidin-2-yl]-N-propylpiperidine-4-carboxamide	C22H25FN4O2S	7.04355	-3.04023	429.174	pos	M+Na, 2M+H, M+K, M+NH4, M+H, M+H-H2O, M+H-2H2O									9.70977e+06
1.90_165.0785n	D-phenylalanine	C9H11NO2	1.90188	-2.71996	164.071	neg	M-H, 2M-H	71567	COLNVLDHVKWLRT-MRVPVSSYSA-N	C1=CC=C(C=C1)C[C@H](C(=O)O)N	-1.5	C02265	Organic acids and derivatives	Carboxylic acids and derivatives	Amino acids, peptides, and analogues	9.29983e+06
4.66_162.0313n	4-Methylphthalic anhydride	C9H6O3	4.66087	-2.55444	163.039	pos	M+H-H2O, M+H	88069	ZOXBWJMCXHTKNU-UHFFFAOYSA-N	CC1=CC2=C(C=C1)C(=O)OC2=O	1.7		Organoheterocyclic compounds	Benzofurans	Benzofuranones	8.0962e+06
7.35_209.0298m/z	Mucicacid	C6H10O8	7.3489	-2.4988	209.03	neg	M-H	3037582	DSLZVSRJTYRBFB-DUHBMQHGSA-N	[C@@H]([C@@H]([C@H](C(=O)O)O)O)([C@@H](C(=O)O)O)O	-2.5	C00879	Organic oxygen compounds	Organooxygen compounds	Carbohydrates and carbohydrate conjugates	7.77344e+06
8.80_161.0240m/z	3 Hydroxycoumarin	C9H6O3	8.80318	-2.37124	161.024	neg	M-H	13650	MJKVTPMWOKAVMS-UHFFFAOYSA-N	C1=CC=C2C(=C1)C=C(C(=O)O2)O	1.8		Phenylpropanoids and polyketides	Coumarins and derivatives	Hydroxycoumarins	6.06626e+06
0.83_863.2428m/z	Verbascose	C30H52O26	0.834033	-1.5685	863.243	neg	M+Cl					C08252				5.81256e+06
0.88_226.9958m/z	D-threo-Isocitric acid	C6H8O7	0.880417	-3.11901	226.996	neg	M+Cl	5318532	ODBLHEXUDAPZAU-ZAFYKAAXSA-N	C([C@@H]([C@H](C(=O)O)O)C(=O)O)C(=O)O	-1.8	C00451	Organic acids and derivatives	Carboxylic acids and derivatives	Tricarboxylic acids and derivatives	5.7042e+06
3.66_153.0189m/z	Protocatechuic acid	C7H6O4	3.65662	-2.68206	153.019	neg	M-H	72	YQUVCSBJEUQKSH-UHFFFAOYSA-N	C1=CC(=C(C=C1C(=O)O)O)O	1.1	C00230	Benzenoids	Benzene and substituted derivatives	Benzoic acids and derivatives	5.57092e+06
6.18_508.1207n	Syringetin-3-O-galactoside	C23H24O13	6.18157	-1.86264	509.128	pos	M+H, M+Na	20056941	JMFWYRWPJVEZPV-SFBSONLZSA-N	COC1=CC(=CC(=C1O)OC)C2=C(C(=O)C3=C(C=C(C=C3O2)O)O)OC4[C@@H]([C@H]([C@H]([C@H](O4)CO)O)O)O	0.7		Phenylpropanoids and polyketides	Flavonoids	Flavonoid glycosides	5.43636e+06
6.15_505.0979m/z	Quercetin 3-O-beta-glucopyranosyl-6'-acetate	C23H22O13	6.1479	-1.76349	505.098	neg	M-H									4.26739e+06
10.19_517.3158n	PC(18:3/0:0)	C26H48NO7P	10.1864	-1.99308	518.323	pos	M+H, M+Na	24779469	WKQNRCYKYCKESD-YVHLTTHBSA-N	CC/C=C\C/C=C\C/C=C\CCCCCCCC(=O)OC[C@H](COP(=O)([O-])OCC[N+](C)(C)C)O	4.3		Lipids and lipid-like molecules	Glycerophospholipids	Glycerophosphocholines	3.99933e+06
4.76_403.1598m/z	Diethyloxalpropionate	C9H14O5	4.76215	-2.79586	403.16	neg	2M-H	97750	OQOCQBJWOCRPQY-UHFFFAOYSA-N	CCOC(=O)C(C)C(=O)C(=O)OCC	1.3	C04067	Organic acids and derivatives	Keto acids and derivatives	Beta-keto acids and derivatives	3.7345e+06
1.23_191.0193m/z	Citrate	C6H8O7	1.2276	-2.38215	191.019	neg	M-H	31348	KRKNYBCHXYNGOX-UHFFFAOYSA-K	C(C(=O)[O-])C(CC(=O)[O-])(C(=O)[O-])O	0.2	C00158	Organic acids and derivatives	Carboxylic acids and derivatives	Tricarboxylic acids and derivatives	3.72264e+06
11.40_834.5282m/z	GPSer(22:6/18:0)	C46H78NO10P	11.4002	-0.967084	834.528	neg	M-H									3.71309e+06
0.79_539.1374m/z	Raffinose	C18H32O16	0.793683	-2.14831	539.137	neg	M+Cl	439242	MUPFEKGTMRGPLJ-ZQSKZDJDSA-N	C([C@@H]1[C@@H]([C@@H]([C@H]([C@H](O1)OC[C@@H]2[C@H]([C@@H]([C@H]([C@H](O2)O[C@]3([C@H]([C@@H]([C@H](O3)CO)O)O)CO)O)O)O)O)O)O)O	-5.8	C00492	Organic oxygen compounds	Organooxygen compounds	Carbohydrates and carbohydrate conjugates	3.59933e+06
10.20_351.2521m/z	(E)-5-(1,2,4a,5-tetramethyl-7-oxo-3,4,8,8a-tetrahydro-2H-naphthalen-1-yl)-3-methylpent-2-enoic acid	C20H30O3	10.1988	-2.80631	351.252	pos	M+CH3OH+H	13918478	SLMFLTPPPXRYHP-JLHYYAGUSA-N	CC1CCC2(C(C1(C)CC/C(=C/C(=O)O)/C)CC(=O)C=C2C)C	4.8		Lipids and lipid-like molecules	Prenol lipids	Diterpenoids	3.52939e+06
1.03_86.0968m/z	Piperidine	C5H11N	1.03448	4.31138	86.0968	pos	M+H	8082	NQRYJNQNLNOLGT-UHFFFAOYSA-N	C1CCNCC1	0.8	C01746	Organoheterocyclic compounds	Piperidines		3.48408e+06
10.79_519.3315n	PC(18:2/0:0)	C26H50NO7P	10.7931	-1.86819	520.339	pos	M+H, M+K, M+Na	497299	IHNKQIMGVNPMTC-RUZDIDTESA-N	CCCCCCCCCCCCCCCCCC(=O)OC[C@H](COP(=O)([O-])OCC[N+](C)(C)C)O	6.6		Lipids and lipid-like molecules	Glycerophospholipids	Glycerophosphocholines	3.39497e+06
0.86_213.0167m/z	D-(-)-Gulono-gamma-lactone	C6H10O6	0.861783	-2.58163	213.017	neg	M+Cl									3.39252e+06
1.63_231.0140m/z	Maleic acid	C4H4O4	1.62638	-2.96133	231.014	neg	2M-H	444266	VZCYOOQTPOCHFL-UPHRSURJSA-N	C(=C\C(=O)O)\C(=O)O	-0.3	C01384	Organic acids and derivatives	Carboxylic acids and derivatives	Dicarboxylic acids and derivatives	2.65373e+06
2.58_282.1191m/z	2'-O-Methyladenosine	C11H15N5O4	2.58262	-2.20729	282.119	pos	M+H	102213	FPUGCISOLXNPPC-IOSLPCCCSA-N	CO[C@@H]1[C@@H]([C@H](O[C@H]1N2C=NC3=C(N=CN=C32)N)CO)O	-0.5		Nucleosides, nucleotides, and analogues	Purine nucleosides		2.30076e+06
5.72_927.1822m/z	Quercetin-3-O-glucoside	C21H20O12	5.7212	-1.56426	927.182	neg	2M-H	22630387	RPVIQWDFJPYNJM-UHFFFAOYSA-N	C1=CC(=C(C=C1C2=C(C(=O)C3=C(C=C(C=C3O2)O)O)OC4C(C(C(C(O4)CO)O)O)O)O)OC5C(C(C(C(O5)CO)O)O)O	-1.4	C05623	Phenylpropanoids and polyketides	Flavonoids	Flavonoid glycosides	2.25747e+06
6.16_551.1021m/z	Quercetin 3-O-malonylglucoside	C24H22O15	6.15927	-1.81801	551.102	pos	M+H	5282159	NBQPHANHNTWDML-UJKBSQBPSA-N	C1=CC(=C(C=C1C2=C(C(=O)C3=C(C=C(C=C3O2)O)O)O[C@H]4[C@@H]([C@H]([C@@H]([C@H](O4)COC(=O)CC(=O)O)O)O)O)O)O	0.1	C12638	Phenylpropanoids and polyketides	Flavonoids	Flavonoid glycosides	2.25618e+06
7.06_163.0761m/z	Isoeugenol	C10H12O2	7.05685	-2.27488	163.076	neg	M-H	853433	BJIOGJUNALELMI-ONEGZZNKSA-N	C/C=C/C1=CC(=C(C=C1)O)OC	2.6	C10469	Benzenoids	Phenols	Methoxyphenols	2.19324e+06
2.30_146.1172m/z	N-Methylisoleucine	C7H15NO2	2.29983	-2.36422	146.117	pos	M+H	560437	KSPIYJQBLVDRRI-UHFFFAOYSA-N	CCC(C)C(C(=O)O)NC	-1.8		Organic acids and derivatives	Carboxylic acids and derivatives	Amino acids, peptides, and analogues	2.07034e+06
5.76_303.0492m/z	quercetin	C15H10O7	5.75683	-2.36778	303.049	pos	M+H	5280343	REFJWTPEDVJJIY-UHFFFAOYSA-N	C1=CC(=C(C=C1C2=C(C(=O)C3=C(C=C(C=C3O2)O)O)O)O)O	1.5	C00389	Phenylpropanoids and polyketides	Flavonoids	Flavones	2.04341e+06
5.91_206.0817m/z	N-acetylphenylalanine	C11H13NO3	5.90983	-2.57456	206.082	neg	M-H	74839	CBQJSKKFNMDLON-JTQLQIEISA-N	CC(=O)N[C@@H](CC1=CC=CC=C1)C(=O)O	0.6		Organic acids and derivatives	Carboxylic acids and derivatives	Amino acids, peptides, and analogues	1.90167e+06
0.81_133.0739n	N-Methylthreonine	C5H11NO3	0.8108	0.285119	116.071	pos	M+H-H2O, M+H	7010355	CCAIIPMIAFGKSI-DMTCNVIQSA-N	C[C@H]([C@@H](C(=O)O)NC)O	-3.1		Organic acids and derivatives	Carboxylic acids and derivatives	Amino acids, peptides, and analogues	1.8371e+06
1.34_152.0564m/z	Guanine	C5H5N5O	1.34035	-1.80985	152.056	pos	M+H	135398634	UYTPUPDQBNUYGX-UHFFFAOYSA-N	C1=NC2=C(N1)C(=O)NC(=N2)N	-1.1	C00242	Organoheterocyclic compounds	Imidazopyrimidines	Purines and purine derivatives	1.78555e+06
5.47_172.0975m/z	N-Acetyl-leucine	C8H15NO3	5.46552	-2.29244	172.098	neg	M-H	70912	WXNXCEHXYPACJF-ZETCQYMHSA-N	CC(C)C[C@@H](C(=O)O)NC(=O)C	0.5	C02710	Organic acids and derivatives	Carboxylic acids and derivatives	Amino acids, peptides, and analogues	1.76952e+06
6.60_493.1331m/z	6-Hydroxyluteolin 6,3'-dimethyl ether 7-glucoside	C23H24O12	6.60338	-1.84436	493.133	pos	M+H	44258501	YFZSQPRYLBGYKE-SLYRBRRESA-N	COC1=C(C=CC(=C1)C2=CC(=O)C3=C(C(=C(C=C3O2)O[C@H]4C([C@H]([C@@H](C(O4)CO)O)O)O)OC)O)O	0.8		Phenylpropanoids and polyketides	Flavonoids	Flavonoid glycosides	1.62963e+06
6.23_479.1174m/z	Isorhamnetin-3-galactoside	C22H22O12	6.22755	-2.08289	479.117	pos	M+H	13245586	CQLRUIIRRZYHHS-UHFFFAOYSA-N	COC1=C(C=CC(=C1)C2=C(C(=O)C3=C(C=C(C=C3O2)O)O)OC4C(C(C(C(O4)CO)O)O)O)O	0.7		Phenylpropanoids and polyketides	Flavonoids	Flavonoid glycosides	1.61035e+06
5.40_165.0189m/z	Phthalic acid	C8H6O4	5.40348	-2.80619	165.019	neg	M-H	1017	XNGIFLGASWRNHJ-UHFFFAOYSA-N	C1=CC=C(C(=C1)C(=O)O)C(=O)O	0.7	C01606	Benzenoids	Benzene and substituted derivatives	Benzoic acids and derivatives	1.59716e+06
11.24_495.3314n	PC(16:0/0:0)	C24H50NO7P	11.2351	-2.13144	496.339	pos	M+H, M+Na	460602	ASWBNKHCZGQVJV-HSZRJFAPSA-N	CCCCCCCCCCCCCCCC(=O)OC[C@H](COP(=O)([O-])OCC[N+](C)(C)C)O	5.6		Lipids and lipid-like molecules	Glycerophospholipids	Glycerophosphocholines	1.58369e+06
6.48_187.0971m/z	Azelaic acid	C9H16O4	6.4755	-2.75232	187.097	neg	M-H	2266	BDJRBEYXGGNYIS-UHFFFAOYSA-N	C(CCCC(=O)O)CCCC(=O)O	1.6	C08261	Lipids and lipid-like molecules	Fatty Acyls	Fatty acids and conjugates	1.45673e+06
9.77_312.2293n	9-Hydroxy-10,12-octadecadienoic acid	C18H32O4	9.76813	-2.333	311.222	neg	M-H2O-H, M-H	5282945	NPDSHTNEKLQQIJ-SIGMCMEVSA-N	CCCCC/C=C/C=C/C(CCCCCCCC(=O)O)O	5.3	C21923	Lipids and lipid-like molecules	Fatty Acyls	Lineolic acids and derivatives	1.45145e+06
7.81_466.2194n	4-(4-benzyl-2,3-dioxopiperazin-1-yl)-N-(2,5-dimethoxyphenyl)piperidine-1-carboxamide	C25H30N4O5	7.80528	-4.81793	467.227	pos	M+H-2H2O, M+H-H2O, M+H									1.44352e+06
8.58_235.1687m/z	Curcumenol	C15H22O2	8.5798	-2.27386	235.169	pos	M+H	167812	ISFMXVMWEWLJGJ-NZBPQXDJSA-N	C[C@H]1CC[C@@H]2[C@]13CC(=C(C)C)[C@](O3)(C=C2C)O	2.2	C16942	Lipids and lipid-like molecules	Prenol lipids	Sesquiterpenoids	1.3266e+06
8.16_467.2265m/z	Glu Arg Tyr	C20H30N6O7	8.15537	3.58334	467.227	pos	M+H	10181671	WVRUKYLYMFGKAN-IHRRRGAJSA-N	C1=CC(=CC=C1C[C@@H](C(=O)N[C@@H](CCC(=O)O)C(=O)N[C@@H](CCC(=O)O)C(=O)O)N)O	-4.8		Organic acids and derivatives	Carboxylic acids and derivatives	Amino acids, peptides, and analogues	1.31382e+06
4.21_179.0346m/z	caffeic acid	C9H8O4	4.20835	-2.33571	179.035	neg	M-H	689043	QAIPRVGONGVQAS-DUXPYHPUSA-N	C1=CC(=C(C=C1/C=C/C(=O)O)O)O	1.2	C01481	Phenylpropanoids and polyketides	Cinnamic acids and derivatives	Hydroxycinnamic acids and derivatives	1.25306e+06
1.03_284.0983m/z	Guanosine	C10H13N5O5	1.03448	-2.41588	284.098	pos	M+H	135398635	NYHBQMYGNKIUIF-UUOKFMHZSA-N	C1=NC2=C(N1[C@H]3[C@@H]([C@@H]([C@H](O3)CO)O)O)N=C(NC2=O)N	-1.9	C00387	Nucleosides, nucleotides, and analogues	Purine nucleosides		1.2109e+06
0.91_133.0139m/z	malate	C4H6O5	0.91045	-2.75594	133.014	neg	M-H	525	BJEPYKJPYRNKOW-UHFFFAOYSA-N	C(C(C(=O)O)O)C(=O)O	-1.3	C00711	Organic acids and derivatives	Hydroxy acids and derivatives	Beta hydroxy acids and derivatives	1.20669e+06
6.69_137.0240m/z	p-Hydroxybenzoic acid	C7H6O3	6.6949	-2.71861	137.024	neg	M-H	135	FJKROLUGYXJWQN-UHFFFAOYSA-N	C1=CC(=CC=C1C(=O)O)O	1.6	C00156	Benzenoids	Benzene and substituted derivatives	Benzoic acids and derivatives	1.13699e+06
5.05_377.1447m/z	Flavin mononucleotide	C17H20N4O6	5.05055	-2.40482	377.145	pos	M+H	643976	FVTCRASFADXXNN-SCRDCRAPSA-N	CC1=CC2=C(C=C1C)N(C3=NC(=O)NC(=O)C3=N2)C[C@@H]([C@@H]([C@@H](COP(=O)(O)O)O)O)O	-2.6	C00061	Nucleosides, nucleotides, and analogues	Flavin nucleotides		1.13413e+06
6.07_516.1258n	3,5-Di-O-caffeoylquinic acid	C25H24O12	6.06892	-1.89012	517.133	pos	M+H, M+Na	6474310	KRZBCHWVBQOTNZ-RDJMKVHDSA-N	C1C(C[C@H](C([C@@H]1OC(=O)/C=C/C2=CC(=C(C=C2)O)O)O)OC(=O)/C=C/C3=CC(=C(C=C3)O)O)(O)C(=O)O	1.5		Organic oxygen compounds	Organooxygen compounds	Alcohols and polyols	1.11096e+06
10.87_310.2136n	13S-Hydroperoxy-9Z,11E,15Z-octadecatrienoic acid	C18H30O4	10.8661	-2.47823	293.21	pos	M+H-H2O, M+H, M+ACN+H	5497123	UYQGVDXDXBAABN-FQSPHKRJSA-N	CC/C=C\C[C@@H](/C=C/C=C\CCCCCCCC(=O)O)OO	4.8		Lipids and lipid-like molecules	Fatty Acyls	Lineolic acids and derivatives	1.09889e+06
0.81_103.0637n	gamma-Aminobutyric acid	C4H9NO2	0.8108	3.84825	104.071	pos	M+H-H2O, M+H	119	BTCSSZJGUNDROE-UHFFFAOYSA-N	C(CC(=O)O)CN	-3.2	C00334	Organic acids and derivatives	Carboxylic acids and derivatives	Amino acids, peptides, and analogues	1.08866e+06
5.09_177.0189m/z	Esculetin	C9H6O4	5.08508	-2.41614	177.019	neg	M-H	5281416	ILEDWLMCKZNDJK-UHFFFAOYSA-N	C1=CC(=O)OC2=CC(=C(C=C21)O)O	1.2	C09263	Phenylpropanoids and polyketides	Coumarins and derivatives	Hydroxycoumarins	1.02995e+06
5.10_167.0345m/z	Vanillic acid	C8H8O4	5.0956	-2.59883	167.035	neg	M-H	8468	WKOLLVMJNQIZCI-UHFFFAOYSA-N	COC1=C(C=CC(=C1)C(=O)O)O	1.4	C06672	Benzenoids	Benzene and substituted derivatives	Benzoic acids and derivatives	973534
6.43_133.1010m/z	Cumic alcohol	C10H14O	6.42505	-1.33619	133.101	pos	M+H-H2O	325	OIGWAXDAPKFNCQ-UHFFFAOYSA-N	CC(C)C1=CC=C(C=C1)CO	2.3	C06576	Lipids and lipid-like molecules	Prenol lipids	Monoterpenoids	929773
6.15_479.0813m/z	Quercetin 3-O-glucuronide	C21H18O13	6.1472	-1.49902	479.081	pos	M+H	5274585	DUBCCGAQYVUYEU-ZUGPOPFOSA-N	C1=CC(=C(C=C1C2=C(C(=O)C3=C(C=C(C=C3O2)O)O)O[C@H]4[C@@H]([C@H]([C@@H]([C@H](O4)C(=O)O)O)O)O)O)O	0.6		Phenylpropanoids and polyketides	Flavonoids	Flavonoid glycosides	923891
0.82_243.0850n	Cytidine	C9H13N3O5	0.821567	-1.985	244.092	pos	M+H, 2M+Na, 2M+H	6175	UHDGCWIWMRVCDJ-XVFCMESISA-N	C1=CN(C(=O)N=C1N)[C@H]2[C@@H]([C@@H]([C@H](O2)CO)O)O	-2.1	C00475	Nucleosides, nucleotides, and analogues	Pyrimidine nucleosides		855177
6.74_238.1928n	4(15)-Selinene-11,12-diol	C15H26O2	6.74138	-2.00886	221.19	pos	M+H-H2O, M+H									842271
6.17_449.1068m/z	Cynaroside	C21H20O11	6.16943	-2.30575	449.107	pos	M+H	5280637	PEFNSGRTCBGNAN-QNDFHXLGSA-N	C1=CC(=C(C=C1C2=CC(=O)C3=C(C=C(C=C3O2)O[C@H]4[C@@H]([C@H]([C@@H]([C@H](O4)CO)O)O)O)O)O)O	0.5	C03951	Phenylpropanoids and polyketides	Flavonoids	Flavonoid glycosides	794104
3.63_118.0651m/z	2-Aminoacetophenone	C8H9NO	3.6343	0.0660587	118.065	pos	M+H-H2O	11952	HEQOJEGTZCTHCF-UHFFFAOYSA-N	C1=CC=C(C=C1)C(=O)CN	0.8		Organic oxygen compounds	Organooxygen compounds	Carbonyl compounds	709961
3.46_346.1254n	4-Hydroxy-3,5-dimethoxybenzyl -D-glucopyranoside	C15H22O9	3.4634	-2.80323	369.115	pos	M+Na, 2M+Na, M+NH4									697340
7.60_233.1531m/z	Costunolide	C15H20O2	7.6033	-2.29773	233.153	pos	M+H	5281437	HRYLQFBHBWLLLL-AHNJNIBGSA-N	C/C/1=C\CC/C(=C/[C@@H]2[C@@H](CC1)C(=C)C(=O)O2)/C	2.1	C09382	Lipids and lipid-like molecules	Prenol lipids	Terpene lactones	669636
3.67_197.0450m/z	Syringic acid	C9H10O5	3.66838	-2.68812	197.045	neg	M-H	10742	JMSVCTWVEWCHDZ-UHFFFAOYSA-N	COC1=CC(=CC(=C1O)OC)C(=O)O	1	C10833	Benzenoids	Benzene and substituted derivatives	Benzoic acids and derivatives	669301
3.94_197.0450m/z	2-Hydroxy-3,4-Dimethoxybenzoic Acid	C9H10O5	3.93693	-2.6734	197.045	neg	M-H	79737	CJFQIVAOBBTJCI-UHFFFAOYSA-N	COC1=C(C(=C(C=C1)C(=O)O)O)OC	1.9		Benzenoids	Benzene and substituted derivatives	Benzoic acids and derivatives	646693
7.92_230.2474m/z	N,N-Dimethyldodecylamine N-oxide	C14H31NO	7.92032	-2.07058	230.247	pos	M+H	15433	SYELZBGXAIXKHU-UHFFFAOYSA-N	CCCCCCCCCCCC[N+](C)(C)[O-]	5.3		Organic nitrogen compounds	Organonitrogen compounds	Aminoxides	642368
4.60_360.2119m/z	Leu Glu Val	C16H29N3O6	4.6033	-2.85705	360.212	pos	M+H	145456420	HVJVUYQWFYMGJS-GVXVVHGQSA-N	CC(C)C[C@@H](C(=O)N[C@@H](CCC(=O)O)C(=O)N[C@@H](C(C)C)C(=O)O)N	-3.4		Organic acids and derivatives	Carboxylic acids and derivatives	Amino acids, peptides, and analogues	634862
6.11_163.0396m/z	Phenylpyruvic acid	C9H8O3	6.10918	-2.62419	163.04	neg	M-H	997	BTNMPGBKDVTSJY-UHFFFAOYSA-N	C1=CC=C(C=C1)CC(=O)C(=O)O	1.3	C00166	Benzenoids	Benzene and substituted derivatives	Phenylpyruvic acid derivatives	617629
6.21_477.1024m/z	Isorhamnetin-3-O-glucoside	C22H22O12	6.21292	-3.07228	477.102	neg	M-H	5318645	CQLRUIIRRZYHHS-LFXZADKFSA-N	COC1=C(C=CC(=C1)C2=C(C(=O)C3=C(C=C(C=C3O2)O)O)O[C@H]4[C@@H]([C@H]([C@@H]([C@H](O4)CO)O)O)O)O	0.7	C22589	Phenylpropanoids and polyketides	Flavonoids	Flavonoid glycosides	597965
2.27_156.0662m/z	N-Acetyl-proline	C7H11NO3	2.26707	-2.45606	156.066	neg	M-H	322640	GNMSLDIYJOSUSW-UHFFFAOYSA-N	CC(=O)N1CCCC1C(=O)O	-0.7		Organic acids and derivatives	Carboxylic acids and derivatives	Amino acids, peptides, and analogues	581698
5.98_181.0502m/z	Syringaldehyde	C9H10O4	5.97972	-2.17245	181.05	neg	M-H	8655	KCDXJAYRVLXPFO-UHFFFAOYSA-N	COC1=CC(=CC(=C1O)OC)C=O	0		Benzenoids	Phenols	Methoxyphenols	570579
6.40_135.1166m/z	Perilla alcohol	C10H16O	6.40278	-1.47049	135.117	pos	M+H-H2O	10819	NDTYTMIUWGWIMO-UHFFFAOYSA-N	CC(=C)C1CCC(=CC1)CO	2.1		Lipids and lipid-like molecules	Prenol lipids	Monoterpenoids	539490
5.57_611.1598m/z	RUTIN	C27H30O16	5.56797	-1.3909	611.16	pos	M+H	5280805	IKGXIBQEEMLURG-NVPNHPEKSA-N	C[C@H]1[C@@H]([C@H]([C@H]([C@@H](O1)OC[C@@H]2[C@H]([C@@H]([C@H]([C@@H](O2)OC3=C(OC4=CC(=CC(=C4C3=O)O)O)C5=CC(=C(C=C5)O)O)O)O)O)O)O)O	-1.3	C05625	Phenylpropanoids and polyketides	Flavonoids	Flavonoid glycosides	537098
11.69_294.2187n	9-Oxo-10E,12Z-octadecadienoic acid	C18H30O3	11.6911	-2.54018	295.226	pos	M+H, M+Na	9839084	LUZSWWYKKLTDHU-ZJHFMPGASA-N	CCCCC/C=C\C=C\C(=O)CCCCCCCC(=O)O	5.2		Lipids and lipid-like molecules	Fatty Acyls	Lineolic acids and derivatives	516298
6.53_160.1096n	(R)-2-Hydroxycaprylic acid	C8H16O3	6.53118	-1.97647	141.092	neg	M-H2O-H, M-H	5312860	JKRDADVRIYVCCY-SSDOTTSWSA-N	CCCCCC[C@H](C(=O)O)O	2		Lipids and lipid-like molecules	Fatty Acyls	Fatty acids and conjugates	505964
8.13_325.2001m/z	(2E,4E)-12-hydroxy-13-(hydroxymethyl)-3,5,7-trimethyltetradeca-2,4-dienedioic acid	C18H30O6	8.1322	-2.43931	325.2	pos	M+H-H2O	10405119	QFZISQBFEIXWDM-UTLPMFLDSA-N	CC(CCCCC(C(CO)C(=O)O)O)C/C(=C/C(=C/C(=O)O)/C)/C	3.2		Lipids and lipid-like molecules	Fatty Acyls	Fatty acids and conjugates	504114
2.52_218.1027m/z	Pantothenic acid	C9H17NO5	2.52208	-2.97234	218.103	neg	M-H	6613	GHOKWGTUZJEAQD-ZETCQYMHSA-N	CC(C)(CO)[C@H](C(=O)NCCC(=O)O)O	-1.1	C00864	Organic oxygen compounds	Organooxygen compounds	Alcohols and polyols	488507
4.62_160.0521n	2,6-Dihydroxynaphthalene	C10H8O2	4.6153	-2.1384	193.086	pos	M+H, 2M+ACN+H, M+CH3OH+H	93552	MNZMMCVIXORAQL-UHFFFAOYSA-N	C1=CC2=C(C=CC(=C2)O)C=C1O	2.3	C16213	Benzenoids	Naphthalenes	Naphthols and derivatives	488401
10.75_476.2772m/z	PE(18:2/0:0)	C23H44NO7P	10.7501	-2.16845	476.277	neg	M-H	9547068	BBYWOYAFBUOUFP-JOCHJYFZSA-N	CCCCCCCCCCCCCCCCCC(=O)OC[C@H](COP(=O)(O)OCCN)O	3.4		Lipids and lipid-like molecules	Glycerophospholipids	Glycerophosphoethanolamines	487512
1.53_252.1086m/z	Cordycepin	C10H13N5O3	1.53248	-1.95947	252.109	pos	M+H	6303	OFEZSBMBBKLLBJ-BAJZRUMYSA-N	C1[C@H](O[C@H]([C@@H]1O)N2C=NC3=C(N=CN=C32)N)CO	-1.2	C08431	Nucleosides, nucleotides, and analogues	Purine nucleosides	Purine 3'-deoxyribonucleosides	484670
5.98_183.0649m/z	4-Hydroxy-3,5-dimethoxybenzaldehyde	C9H10O4	5.98267	-1.77566	183.065	pos	M+H	8655	KCDXJAYRVLXPFO-UHFFFAOYSA-N	COC1=CC(=CC(=C1O)OC)C=O	0	C02201	Benzenoids	Phenols	Methoxyphenols	471671
8.57_309.2064m/z	9S-Hydroperoxy-10E,12Z,15Z-octadecatrienoic acid	C18H30O4	8.57472	-2.47921	309.206	neg	M-H	6450029	RWKJTIHNYSIIHW-MEBVTJQTSA-N	CC/C=C\C/C=C\C=C\[C@H](CCCCCCCC(=O)O)OO	4.7		Lipids and lipid-like molecules	Fatty Acyls	Lineolic acids and derivatives	459658
4.26_326.0993n	Melilotoside	C15H18O8	4.26128	-2.55402	325.092	neg	M-H, M+Cl	5280759	GVRIYIMNJGULCZ-ZMKUSUEASA-N	C1=CC=C(C(=C1)/C=C/C(=O)O)O[C@H]2[C@@H]([C@H]([C@@H]([C@H](O2)CO)O)O)O	-0.4		Organic oxygen compounds	Organooxygen compounds	Carbohydrates and carbohydrate conjugates	455063
6.31_345.1465m/z	[4-(4-chlorophenyl)piperazin-1-yl]-(5,6,7,8-tetrahydroimidazo[1,2-a]pyridin-2-yl)methanone	C18H21ClN4O	6.31398	-3.29401	345.147	pos	M+H									445256
1.03_181.0735n	L-Tyrosine	C9H11NO3	1.02993	-2.38027	180.066	neg	M-H, M+Cl	6057	OUYCCCASQSFEME-QMMMGPOBSA-N	C1=CC(=CC=C1C[C@@H](C(=O)O)N)O	-2.3	C00082	Organic acids and derivatives	Carboxylic acids and derivatives	Amino acids, peptides, and analogues	443568
5.61_207.0657m/z	Sinapaldehyde	C11H12O4	5.60717	-2.61742	207.066	neg	M-H	5280802	CDICDSOGTRCHMG-ONEGZZNKSA-N	COC1=CC(=CC(=C1O)OC)/C=C/C=O	1.4	C05610	Benzenoids	Phenols	Methoxyphenols	432090
3.63_174.0790n	Indole-3-acetamide	C10H10N2O	3.6343	-1.91949	175.086	pos	M+H-H2O, M+H	397	ZOAMBXDOGPRZLP-UHFFFAOYSA-N	C1=CC=C2C(=C1)C(=CN2)CC(=O)N	0.8	C02693	Organoheterocyclic compounds	Indoles and derivatives	Indoles	414063
0.82_112.0506m/z	Cytosine	C4H5N3O	0.821567	0.87657	112.051	pos	M+H	597	OPTASPLRGRRNAP-UHFFFAOYSA-N	C1=C(NC(=O)N=C1)N	-1.7	C00380	Organoheterocyclic compounds	Diazines	Pyrimidines and pyrimidine derivatives	413791
1.65_281.1489m/z	Val Tyr	C14H20N2O4	1.65085	-2.28433	281.149	pos	M+H	7009555	VEYJKJORLPYVLO-RYUDHWBXSA-N	CC(C)[C@@H](C(=O)N[C@@H](CC1=CC=C(C=C1)O)C(=O)O)N	-2.5		Organic acids and derivatives	Carboxylic acids and derivatives	Amino acids, peptides, and analogues	408504
3.65_109.0292m/z	Pyrocatechol	C6H6O2	3.64662	-3.08043	109.029	neg	M-H	289	YCIMNLLNPGFGHC-UHFFFAOYSA-N	C1=CC=C(C(=C1)O)O	0.9	C00090	Benzenoids	Phenols	Benzenediols	404072
5.99_174.0556m/z	Indoleacetic acid	C10H9NO2	5.98958	-2.67928	174.056	neg	M-H	802	SEOVTRFCIGRIMH-UHFFFAOYSA-N	C1=CC=C2C(=C1)C(=CN2)CC(=O)O	1.4	C00954	Organoheterocyclic compounds	Indoles and derivatives	Indolyl carboxylic acids and derivatives	397333
1.57_283.0676m/z	xanthosine	C10H12N4O6	1.57432	-2.90081	283.068	neg	M-H	64959	UBORTCNDUKBEOP-UUOKFMHZSA-N	C1=NC2=C(N1[C@H]3[C@@H]([C@@H]([C@H](O3)CO)O)O)NC(=O)NC2=O	-2.4	C01762	Nucleosides, nucleotides, and analogues	Purine nucleosides		396332
1.19_129.0425n	L-Pyroglutamic acid	C5H7NO3	1.19307	-0.717222	130.05	pos	M+H, M+ACN+H	7405	ODHCTXKNWHHXJC-VKHMYHEASA-N	C1CC(=O)N[C@@H]1C(=O)O	-0.8	C01879	Organic acids and derivatives	Carboxylic acids and derivatives	Amino acids, peptides, and analogues	372392
7.09_359.0763m/z	Centaureidin	C18H16O8	7.08875	-2.50687	359.076	neg	M-H	5315773	BZXULYMZYPRZOG-UHFFFAOYSA-N	COC1=C(C=C(C=C1)C2=C(C(=O)C3=C(O2)C=C(C(=C3O)OC)O)OC)O	2.8		Phenylpropanoids and polyketides	Flavonoids	O-methylated flavonoids	372124
4.32_295.1646m/z	Tyr Leu	C15H22N2O4	4.3232	-2.02224	295.165	pos	M+H	4466134	AUEJLPRZGVVDNU-UHFFFAOYSA-N	CC(C)CC(C(=O)O)NC(=O)C(CC1=CC=C(C=C1)O)N	-1.8		Organic acids and derivatives	Carboxylic acids and derivatives	Amino acids, peptides, and analogues	357003
3.81_229.1541m/z	Leu Pro	C11H20N2O3	3.81435	-2.33177	229.154	pos	M+H									348452
7.32_492.2431m/z	N-cyclohexyl-4-[4-(1,2-dihydroacenaphthylen-3-ylsulfonyl)piperazin-1-yl]-6-methylpyrimidin-2-amine	C27H33N5O2S	7.32263	0.693174	492.243	pos	M+H									348069
8.27_248.1407n	1-Hydroxy-4(15),11(13)-eudesmadien-12,6-olide	C15H20O3	8.27448	-2.15154	249.148	pos	M+H, M+CH3OH+H									327944
5.14_427.1590m/z	N-methyl-N-(2-(pyridin-2-yl)ethyl)-2-(2,3,5-trimethyl-7-oxo-7H-furo[3,2-g]chromen-6-yl)acetamide	C24H24N2O4	5.13593	-9.58635	427.159	pos	M+Na									327535
5.16_344.2535m/z	Leu Val Leu	C17H33N3O4	5.1575	-2.49802	344.254	pos	M+H	11515702	FPPCCQGECVKLDY-IHRRRGAJSA-N	CC(C)C[C@@H](C(=O)N[C@@H](C(C)C)C(=O)N[C@@H](CC(C)C)C(=O)O)N	-1.6		Organic acids and derivatives	Carboxylic acids and derivatives	Amino acids, peptides, and analogues	320676
5.40_378.2378m/z	Val Leu Phe	C20H31N3O4	5.4035	-2.39486	378.238	pos	M+H	101750924	ZZGPVSZDZQRJQY-ULQDDVLXSA-N	CC(C)C[C@@H](C(=O)N[C@@H](CC1=CC=CC=C1)C(=O)O)NC(=O)[C@H](C(C)C)N	-1.3		Organic acids and derivatives	Carboxylic acids and derivatives	Amino acids, peptides, and analogues	311217
10.14_474.2617m/z	PE(18:3/0:0)	C23H42NO7P	10.1425	-2.00421	474.262	neg	M-H	9547068	BBYWOYAFBUOUFP-JOCHJYFZSA-N	CCCCCCCCCCCCCCCCCC(=O)OC[C@H](COP(=O)(O)OCCN)O	3.4		Lipids and lipid-like molecules	Glycerophospholipids	Glycerophosphoethanolamines	307834
1.03_123.0440m/z	4-Hydroxybenzaldehyde	C7H6O2	1.02553	-0.111172	123.044	pos	M+H	126	RGHHSNMVTDWUBI-UHFFFAOYSA-N	C1=CC(=CC=C1C=O)O	1.4	C00633	Organic oxygen compounds	Organooxygen compounds	Carbonyl compounds	306708
5.85_151.0397m/z	Vanillin	C8H8O3	5.85038	-2.53617	151.04	neg	M-H	1183	MWOOGOJBHIARFG-UHFFFAOYSA-N	COC1=C(C=CC(=C1)C=O)O	1.2	C00755	Benzenoids	Phenols	Methoxyphenols	298769
1.69_260.1599m/z	Gln Ile	C11H21N3O4	1.69367	-2.35077	260.16	pos	M+H	7020102	CNPNWGHRMBQHBZ-ZKWXMUAHSA-N	CC[C@H](C)[C@@H](C(=O)N[C@@H](CCC(=O)N)C(=O)O)N	-4.2		Organic acids and derivatives	Carboxylic acids and derivatives	Amino acids, peptides, and analogues	292550
4.41_332.2172m/z	Val Thr Leu	C15H29N3O5	4.41345	-2.37852	332.217	pos	M+H	101986938	LCHZBEUVGAVMKS-RHYQMDGZSA-N	C[C@H]([C@@H](C(=O)N[C@@H](CC(C)C)C(=O)O)NC(=O)[C@H](C(C)C)N)O	-2		Organic acids and derivatives	Carboxylic acids and derivatives	Amino acids, peptides, and analogues	289308
6.66_439.2294m/z	Thr Arg Tyr	C19H30N6O6	6.6587	-1.18485	439.229	pos	M+H									287391
8.71_302.3046m/z	Sphinganine	C18H39NO2	8.70905	-2.35934	302.305	pos	M+H	91486	OTKJDMGTUTTYMP-ZWKOTPCHSA-N	CCCCCCCCCCCCCCC[C@H]([C@H](CO)N)O	5.8	C00836	Organic nitrogen compounds	Organonitrogen compounds	Amines	269974
5.23_281.1386m/z	Lactarorufin B	C15H22O5	5.22843	-3.03743	281.139	neg	M-H	182703	DBKIEMOKQWYZOA-UHFFFAOYSA-N	CC1(CC2C(C1)C(CC3=C(C2O)COC3=O)(C)O)CO	-0.5		Lipids and lipid-like molecules	Prenol lipids	Terpene lactones	268841
3.60_312.1295m/z	N2,N2-Dimethylguanosine	C12H17N5O5	3.60143	-2.51607	312.129	pos	M+H	135501639	RSPURTUNRHNVGF-IOSLPCCCSA-N	CN(C)C1=NC2=C(C(=O)N1)N=CN2[C@H]3[C@@H]([C@@H]([C@H](O3)CO)O)O	-1.3		Nucleosides, nucleotides, and analogues	Purine nucleosides		259227
6.44_243.1230m/z	4-Oxododecanedioic acid	C12H20O5	6.43565	-3.17996	243.123	neg	M-H	13213508	HHXMOTDTSDYYEI-UHFFFAOYSA-N	C(CCCC(=O)CCC(=O)O)CCCC(=O)O	1.1		Organic acids and derivatives	Keto acids and derivatives	Medium-chain keto acids and derivatives	251490
14.81_857.5163n	GPSer(22:6/20:3)	C48H76NO10P	14.8067	-5.16601	858.524	pos	M+H, M+Na									247192
4.43_339.0712m/z	Esculin	C15H16O9	4.4256	-2.78897	339.071	neg	M-H	5281417	XHCADAYNFIFUHF-TVKJYDDYSA-N	C1=CC(=O)OC2=CC(=C(C=C21)O[C@H]3[C@@H]([C@H]([C@@H]([C@H](O3)CO)O)O)O)O	-0.6	C09264	Phenylpropanoids and polyketides	Coumarins and derivatives	Coumarin glycosides	246646
1.36_126.0315n	1,3,5-Trihydroxybenzene	C6H6O3	1.36178	-1.7858	144.065	pos	M+NH4, M+ACN+H	359	QCDYQQDYXPDABM-UHFFFAOYSA-N	C1=C(C=C(C=C1O)O)O	0.2	C02183	Benzenoids	Phenols	Benzenetriols and derivatives	235050
0.83_221.0896n	N-Acetyl-D-Glucosamine	C8H15NO6	0.831017	-1.70479	222.097	pos	M+H, M+H-2H2O	439174	OVRNDRQMDRJTHS-RTRLPJTCSA-N	CC(=O)N[C@@H]1[C@H]([C@@H]([C@H](OC1O)CO)O)O	-1.7	C00140	Organic oxygen compounds	Organooxygen compounds	Carbohydrates and carbohydrate conjugates	224284
4.74_263.1385m/z	Phe Pro	C14H18N2O3	4.73788	-2.14883	263.138	pos	M+H	7020642	WEQJQNWXCSUVMA-RYUDHWBXSA-N	C1C[C@H](N(C1)C(=O)[C@H](CC2=CC=CC=C2)N)C(=O)O	-1.4		Organic acids and derivatives	Carboxylic acids and derivatives	Amino acids, peptides, and analogues	223851
8.85_201.1634m/z	Alpha-Calacorene	C15H20	8.84733	-1.94323	201.163	pos	M+H	12302243	CUUMXRBKJIDIAY-ZDUSSCGKSA-N	CC1=CC[C@H](C2=C1C=CC(=C2)C)C(C)C	4.4		Lipids and lipid-like molecules	Prenol lipids	Sesquiterpenoids	217705
4.46_318.2016m/z	Ser Val Leu	C14H27N3O5	4.45763	-2.31123	318.202	pos	M+H	145457935	YEDSOSIKVUMIJE-DCAQKATOSA-N	CC(C)C[C@@H](C(=O)O)NC(=O)[C@H](C(C)C)NC(=O)[C@H](CO)N	-2.3		Organic acids and derivatives	Carboxylic acids and derivatives	Amino acids, peptides, and analogues	217666
4.74_149.0595m/z	(E)-Cinnamic acid	C9H8O2	4.73788	-1.69515	149.059	pos	M+H	444539	WBYWAXJHAXSJNI-VOTSOKGWSA-N	C1=CC=C(C=C1)/C=C/C(=O)O	2.1	C10438	Phenylpropanoids and polyketides	Cinnamic acids and derivatives	Cinnamic acids	215973
5.89_289.1540m/z	Indole-3-acetyl-L-leucine	C16H20N2O3	5.8911	-2.4074	289.154	pos	M+H	3945661	HCZNPUHZYPPINM-UHFFFAOYSA-N	CC(C)CC(C(=O)O)NC(=O)CC1=CNC2=CC=CC=C21	2.5		Organic acids and derivatives	Carboxylic acids and derivatives	Amino acids, peptides, and analogues	214992
4.40_345.2125m/z	Val Asn Ile	C15H28N4O5	4.40257	-2.21376	345.212	pos	M+H	145458953	VHRLUTIMTDOVCG-PEDHHIEDSA-N	CC[C@H](C)[C@@H](C(=O)N[C@@H]([C@@H](C)CC)C(=O)O)NC(=O)[C@H](C(C)C)N	-2.1		Organic acids and derivatives	Carboxylic acids and derivatives	Amino acids, peptides, and analogues	212026
1.92_298.1138m/z	3'-O-Methylguanosine	C11H15N5O5	1.92273	-2.67994	298.114	pos	M+H	135742509	UYARPHAXAJAZLU-KQYNXXCUSA-N	CO[C@@H]1[C@H](O[C@H]([C@@H]1O)N2C=NC3=C2N=C(NC3=O)N)CO	-1.9		Nucleosides, nucleotides, and analogues	Purine nucleosides		210936
6.75_353.1827n	4-(butan-2-yl)phenyl 2-(acetylamino)-2-deoxy-beta-D-glucopyranoside	C18H27NO6	6.75292	-3.1243	354.19	pos	M+H-H2O, M+H	16398230	NZLBBWKRFWAHOK-NTCFCCFRSA-N	CCC(C)C1=CC=C(C=C1)O[C@H]2[C@@H]([C@H]([C@@H]([C@H](O2)CO)O)O)NC(=O)C	1.8		Organic oxygen compounds	Organooxygen compounds	Carbohydrates and carbohydrate conjugates	210838
0.88_208.9853m/z	Dehydroascorbic acid	C6H6O6	0.880417	-3.21876	208.985	neg	M+Cl	440667	SBJKKFFYIZUCET-JLAZNSOCSA-N	C([C@@H]([C@@H]1C(=O)C(=O)C(=O)O1)O)O	-1	C05422	Organoheterocyclic compounds	Lactones	Gamma butyrolactones	209033
4.78_330.2379m/z	Leu Val Val	C16H31N3O4	4.78375	-2.51762	330.238	pos	M+H	11559237	FTKXYXACXYOHND-XUXIUFHCSA-N	CC[C@H](C)[C@@H](C(=O)N[C@@H](CC(C)C)C(=O)O)NC(=O)[C@H](C(C)C)N	0		Organic acids and derivatives	Carboxylic acids and derivatives	Amino acids, peptides, and analogues	201834
8.37_221.1895m/z	Caryophyllene epoxide	C15H24O	8.3666	-2.23875	221.189	pos	M+H	14350	NVEQFIOZRFFVFW-UHFFFAOYSA-N	CC1(CC2C1CCC3(C(O3)CCC2=C)C)C	3.6	C16908	Lipids and lipid-like molecules	Prenol lipids	Sesquiterpenoids	199342
5.27_289.1176m/z	Honokiol	C18H18O2	5.2673	-8.56735	289.118	pos	M+Na	72303	FVYXIJYOAGAUQK-UHFFFAOYSA-N	C=CCC1=CC(=C(C=C1)O)C2=CC(=C(C=C2)O)CC=C	5	C10630	Benzenoids	Benzene and substituted derivatives	Biphenyls and derivatives	198279
5.84_227.0910m/z	Isoferulic Acid	C10H10O4	5.83575	-2.30847	227.091	pos	M+CH3OH+H	736186	QURCVMIEKCOAJU-HWKANZROSA-N	COC1=C(C=C(C=C1)/C=C/C(=O)O)O	1.5	C10470	Phenylpropanoids and polyketides	Cinnamic acids and derivatives	Hydroxycinnamic acids and derivatives	196376
2.93_295.1646m/z	Ile Tyr	C15H22N2O4	2.93335	-2.26329	295.165	pos	M+H	7408195	MUFXDFWAJSPHIQ-XDTLVQLUSA-N	CC[C@H](C)[C@@H](C(=O)N[C@@H](CC1=CC=C(C=C1)O)C(=O)O)N	-2.2		Organic acids and derivatives	Carboxylic acids and derivatives	Amino acids, peptides, and analogues	194622
10.60_451.2832m/z	Celastrol	C29H38O4	10.5979	-2.32685	451.283	pos	M+H	122724	KQJSQWZMSAGSHN-JJWQIEBTSA-N	CC1=C(C(=O)C=C2C1=CC=C3[C@]2(CC[C@@]4([C@@]3(CC[C@@]5([C@H]4C[C@](CC5)(C)C(=O)O)C)C)C)C)O	5.9		Lipids and lipid-like molecules	Prenol lipids	Triterpenoids	185606
5.47_610.1523n	Kaempferol 3-O-gentiobioside	C27H30O16	5.46925	-1.75775	611.16	pos	M+H, M+Na	9960512	BITPRCODIALMOV-DEFKTLOSSA-N	C1=CC(=CC=C1C2=C(C(=O)C3=C(C=C(C=C3O2)O)O)O[C@H]4[C@@H]([C@H]([C@@H]([C@H](O4)CO[C@H]5[C@@H]([C@H]([C@@H]([C@H](O5)CO)O)O)O)O)O)O)O	-1.4		Phenylpropanoids and polyketides	Flavonoids	Flavonoid glycosides	184668
5.76_242.1745m/z	1,2,4-Trideoxy-3-C-methyl-4-{[(2E,4E)-2-methyl-2,4-hexadienoyl]amino}pentitol	C13H23NO3	5.75683	-2.2095	242.175	pos	M+H									173304
7.16_263.1282m/z	(+)-Abscisic acid	C15H20O4	7.15988	-2.6738	263.128	neg	M-H	5280896	JLIDBLDQVAYHNE-YKALOCIXSA-N	CC1=CC(=O)CC([C@]1(/C=C/C(=C\C(=O)O)/C)O)(C)C	1.6	C06082	Lipids and lipid-like molecules	Prenol lipids	Sesquiterpenoids	167686
0.84_146.0921m/z	4-Guanidinobutanoic acid	C5H11N3O2	0.840283	-2.31742	146.092	pos	M+H	500	TUHVEAJXIMEOSA-UHFFFAOYSA-N	C(CC(=O)O)CN=C(N)N	-1.5		Organic acids and derivatives	Carboxylic acids and derivatives	Amino acids, peptides, and analogues	165879
10.53_249.1480m/z	Atractylenolide III	C15H20O3	10.525	-1.96416	249.148	pos	M+H	155948	FBMORZZOJSDNRQ-GLQYFDAESA-N	CC1=C2C[C@H]3C(=C)CCC[C@@]3(C[C@@]2(OC1=O)O)C	2.1	C17887	Lipids and lipid-like molecules	Prenol lipids	Terpene lactones	164522
5.10_190.0495m/z	Kynurenic acid	C10H7NO3	5.09542	-1.93646	190.05	pos	M+H	3845	HCZHHEIFKROPDY-UHFFFAOYSA-N	C1=CC=C2C(=C1)C(=O)C=C(N2)C(=O)O	1.3	C01717	Organoheterocyclic compounds	Quinolines and derivatives	Quinoline carboxylic acids	160065
5.19_243.1333m/z	Glutamylleucine	C11H20N2O5	5.19045	-2.37703	243.133	pos	M+H-H2O	9856500	YBAFDPFAUTYYRW-YUMQZZPRSA-N	CC(C)C[C@@H](C(=O)O)NC(=O)[C@H](CCC(=O)O)N	-3.3		Organic acids and derivatives	Carboxylic acids and derivatives	Amino acids, peptides, and analogues	158594
6.13_299.0189m/z	Irigenol	C15H10O8	6.12753	-2.71522	299.019	neg	M-H2O-H									151485
5.47_287.0543m/z	kaempferol	C15H10O6	5.46925	-2.38164	287.054	pos	M+H	5280863	IYRMWMYZSQPJKC-UHFFFAOYSA-N	C1=CC(=CC=C1C2=C(C(=O)C3=C(C=C(C=C3O2)O)O)O)O	1.9	C05903	Phenylpropanoids and polyketides	Flavonoids	Flavones	150364
5.05_410.1912m/z	Tyr Asp Ile	C19H27N3O7	5.05055	-2.3766	410.191	pos	M+H	145454476	RTXQQDVBACBSCW-CFMVVWHZSA-N	CC[C@H](C)[C@@H](C(=O)N[C@@H](CC1=CC=C(C=C1)O)C(=O)O)NC(=O)[C@H](CC(=O)O)N	-2.9		Organic acids and derivatives	Carboxylic acids and derivatives	Amino acids, peptides, and analogues	148825
0.82_360.1491m/z	-Gentiobiose	C12H22O11	0.821567	-2.78675	360.149	pos	M+NH4	441422	DLRVVLDZNNYCBX-LIZSDCNHSA-N	C([C@@H]1[C@H]([C@@H]([C@H]([C@@H](O1)OC[C@@H]2[C@H]([C@@H]([C@H]([C@@H](O2)O)O)O)O)O)O)O)O	-4.7	C08240	Organic oxygen compounds	Organooxygen compounds	Carbohydrates and carbohydrate conjugates	146239
7.27_303.0491m/z	Tricetin	C15H10O7	7.27465	-2.59982	303.049	pos	M+H	5281701	ARSRJFRKVXALTF-UHFFFAOYSA-N	C1=C(C=C(C(=C1O)O)O)C2=CC(=O)C3=C(C=C(C=C3O2)O)O	1	C10192	Phenylpropanoids and polyketides	Flavonoids	Flavones	145725
5.45_275.1383m/z	IAA-Val	C15H18N2O3	5.44825	-2.58177	275.138	pos	M+H	446641	AZEGJHGXTSUPPG-AWEZNQCLSA-N	CC(C)[C@@H](C(=O)O)NC(=O)CC1=CNC2=CC=CC=C21	2.1		Organic acids and derivatives	Carboxylic acids and derivatives	Amino acids, peptides, and analogues	145481
4.27_346.2329m/z	Ile Leu Thr	C16H31N3O5	4.26653	-2.23864	346.233	pos	M+H	145456197	PHRWFSFCNJPWRO-PPCPHDFISA-N	CC[C@H](C)[C@@H](C(=O)N[C@@H](CC(C)C)C(=O)N[C@@H]([C@@H](C)O)C(=O)O)N	-2.1		Organic acids and derivatives	Carboxylic acids and derivatives	Amino acids, peptides, and analogues	145434
6.33_291.0968m/z	Malonyltryptophan	C14H14N2O5	6.32682	-2.50433	291.097	pos	M+H	5199636	OVEAWSPZRGBTSS-UHFFFAOYSA-N	C1=CC=C2C(=C1)C(=CN2)CC(C(=O)O)NC(=O)CC(=O)O	0.3		Organic acids and derivatives	Carboxylic acids and derivatives	Amino acids, peptides, and analogues	145248
4.94_359.2279m/z	Ile Asn Ile	C16H30N4O5	4.9398	-2.7189	359.228	pos	M+H	145457149	KIEPQOIQHFKQLK-PCBIJLKTSA-N	CC[C@H](C)[C@@H](C(=O)O)NC(=O)[C@H](CC(=O)N)NC(=O)[C@H](CC1=CC=CC=C1)N	-2.9		Organic acids and derivatives	Carboxylic acids and derivatives	Amino acids, peptides, and analogues	145095
1.54_293.0540m/z	1-Methylpseudouridine	C10H14N2O6	1.5421	-2.32785	293.054	neg	M+Cl	99543	UVBYMVOUBXYSFV-XUTVFYLZSA-N	CN1C=C(C(=O)NC1=O)[C@H]2[C@@H]([C@@H]([C@H](O2)CO)O)O	-2.6		Nucleosides, nucleotides, and analogues	Nucleoside and nucleotide analogues		138160
10.61_311.2207m/z	9-Oxo-12,13-Epoxy-10-Octadecenoic acid	C18H30O4	10.6101	-3.17293	311.221	pos	M+H	5283007	RCMABBHQYMBYKV-BUHFOSPRSA-N	CCCCCC1C(O1)/C=C/C(=O)CCCCCCCC(=O)O	4		Lipids and lipid-like molecules	Fatty Acyls	Fatty acids and conjugates	136402
6.22_99.0807m/z	2-Hexenal	C6H10O	6.21638	2.54059	99.0807	pos	M+H					C08497				134220
9.23_328.2299m/z	Altrenogest	C21H26O2	9.23203	8.94887	328.23	pos	M+NH4									130804
4.78_148.9522m/z	Trifluoromethanesulfonic acid	CHF3O3S	4.78298	-2.68289	148.952	neg	M-H									130649
6.60_313.0710m/z	Dipteryxin	C17H14O6	6.6025	-2.44908	313.071	neg	M-H	44257265	BSXFDHHTXOAUGB-UHFFFAOYSA-N	COC1=CC=C(C=C1)C2=COC3=C(C(=C(C=C3C2=O)OC)O)O	2.4		Phenylpropanoids and polyketides	Isoflavonoids	O-methylated isoflavonoids	130428
6.60_329.0659m/z	Jaceosidin	C17H14O7	6.6025	-2.48081	329.066	neg	M-H	5379096	GLAAQZFBFGEBPS-UHFFFAOYSA-N	COC1=C(C=CC(=C1)C2=CC(=O)C3=C(O2)C=C(C(=C3O)OC)O)O	1.7		Phenylpropanoids and polyketides	Flavonoids	O-methylated flavonoids	127991
7.55_213.1127m/z	2,2'-(3-Methylcyclohexane-1,1-diyl)diacetic acid	C11H18O4	7.54962	-2.54241	213.113	neg	M-H	220370	HJPDHTDUPWGUHP-UHFFFAOYSA-N	CC1CCCC(C1)(CC(=O)O)CC(=O)O	2.1		Organic acids and derivatives	Carboxylic acids and derivatives	Dicarboxylic acids and derivatives	127309
5.71_303.1331m/z	(5R)-trans-1,7-diphenyl-5-hydroxy-6-hepten-3-one	C19H20O2	5.71025	-8.57766	303.133	pos	M+Na	13347321	NEQGOKAKPXXESR-ACCUITESSA-N	C1=CC=C(C=C1)CCC(=O)CC(/C=C/C2=CC=CC=C2)O	3.3		Phenylpropanoids and polyketides	Diarylheptanoids	Linear diarylheptanoids	126794
6.55_168.1016m/z	p-Synephrine	C9H13NO2	6.54805	-2.03726	168.102	pos	M+H	7172	YRCWQPVGYLYSOX-UHFFFAOYSA-N	CNCC(C1=CC=C(C=C1)O)O	-0.6	C01869	Benzenoids	Phenols	1-hydroxy-2-unsubstituted benzenoids	126774
6.43_323.1382m/z	Indole-3-acetyl-L-phenylalanine	C19H18N2O3	6.42505	-2.58382	323.138	pos	M+H	644227	BUGQHORRADGONS-KRWDZBQOSA-N	C1=CC=C(C=C1)C[C@@H](C(=O)O)NC(=O)CC2=CNC3=CC=CC=C32	2		Organic acids and derivatives	Carboxylic acids and derivatives	Amino acids, peptides, and analogues	126720
4.87_346.1964m/z	Asp Val Leu	C15H27N3O6	4.87192	-2.39953	346.196	pos	M+H	145454616	GIKOVDMXBAFXDF-NHCYSSNCSA-N	CC(C)C[C@@H](C(=O)O)NC(=O)[C@H](C(C)C)NC(=O)[C@H](CC(=O)O)N	-3.8		Organic acids and derivatives	Carboxylic acids and derivatives	Amino acids, peptides, and analogues	126375
0.84_160.0965m/z	Acetyl-Valine	C7H13NO3	0.840283	-2.05566	160.096	pos	M+H									125249
3.18_149.0240m/z	3-Hydroxymandelic acid	C8H8O4	3.18133	-2.53531	149.024	neg	M-H2O-H	86957	OLSDAJRAVOVKLG-UHFFFAOYSA-N	C1=CC(=CC(=C1)O)C(C(=O)O)O	-0.1	C11527	Benzenoids	Phenols	1-hydroxy-4-unsubstituted benzenoids	124946
4.34_359.2279m/z	Gln Val Leu	C16H30N4O5	4.34452	-2.64717	359.228	pos	M+H	145455275	VEYGCDYMOXHJLS-GVXVVHGQSA-N	CC(C)C[C@@H](C(=O)O)NC(=O)[C@H](C(C)C)NC(=O)[C@H](CCC(=O)N)N	-4.1		Organic acids and derivatives	Carboxylic acids and derivatives	Amino acids, peptides, and analogues	124683
0.84_99.0443m/z	Tulipalin A	C5H6O2	0.840283	2.51506	99.0443	pos	M+H	68352	GSLDEZOOOSBFGP-UHFFFAOYSA-N	C=C1CCOC1=O	0.8	C20578	Organoheterocyclic compounds	Lactones	Gamma butyrolactones	123447
1.90_346.0539m/z	3',5'-cyclic GMP	C10H12N5O7P	1.90113	-2.3812	346.054	pos	M+H	135398570	ZOOGRGPOEVQQDX-UUOKFMHZSA-N	C1[C@@H]2[C@H]([C@H]([C@@H](O2)N3C=NC4=C3N=C(NC4=O)N)O)OP(=O)(O1)O	-3.4	C00942	Nucleosides, nucleotides, and analogues	Purine nucleotides	Cyclic purine nucleotides	122125
0.85_174.1121m/z	swainsonine	C8H15NO3	0.848983	-1.88655	174.112	pos	M+H	51683	FXUAIOOAOAVCGD-WCTZXXKLSA-N	C1C[C@H]([C@@H]2[C@@H]([C@@H](CN2C1)O)O)O	-1.3	C10173	Organoheterocyclic compounds	Indolizidines		119313
11.22_315.1932m/z	7-oxodehydroabietic acid	C20H26O3	11.2223	-7.23012	315.193	pos	M+H	29212	MSWJSDLNPCSSNW-MISYRCLQSA-N	CC(C)C1=CC2=C(C=C1)[C@]3(CCC[C@@]([C@@H]3CC2=O)(C)C(=O)O)C	4.5		Lipids and lipid-like molecules	Prenol lipids	Diterpenoids	117446
9.87_233.1103m/z	N-Cyclohexyl-2-benzothiazol-amine	C13H16N2S	9.86887	-1.76127	233.11	pos	M+H	591790	UPWPIFMHSFSVLE-UHFFFAOYSA-N	C1CCC(CC1)NC2=NC3=CC=CC=C3S2	4.4		Organoheterocyclic compounds	Benzothiazoles		115574
3.55_294.1209n	Glu Phe	C14H18N2O5	3.55045	-2.26396	295.128	pos	M+H-H2O, M+H	19365626	XMBSYZWANAQXEV-UHFFFAOYSA-N	C1=CC=C(C=C1)CC(C(=O)O)NC(=O)C(CCC(=O)O)N	-3	C01425	Organic acids and derivatives	Carboxylic acids and derivatives	Amino acids, peptides, and analogues	115210
8.67_211.1324m/z	Jasmonic acid	C12H18O3	8.67458	-2.04791	211.132	pos	M+H	5281166	ZNJFBWYDHIGLCU-HWKXXFMVSA-N	CC/C=C\C[C@@H]1[C@H](CCC1=O)CC(=O)O	1.6	C08491	Lipids and lipid-like molecules	Fatty Acyls	Lineolic acids and derivatives	114889
1.34_267.0725m/z	Inosine	C10H12N4O5	1.34272	-3.79398	267.072	neg	M-H	135398641	UGQMRVRMYYASKQ-KQYNXXCUSA-N	C1=NC2=C(C(=O)N1)N=CN2[C@H]3[C@@H]([C@@H]([C@H](O3)CO)O)O	-1.3	C00294	Nucleosides, nucleotides, and analogues	Purine nucleosides		112700
2.63_223.1073m/z	Gly Phe	C11H14N2O3	2.62638	-2.08951	223.107	pos	M+H	6992304	GLUBLISJVJFHQS-VIFPVBQESA-N	C1=CC=C(C=C1)C[C@@H](C(=O)NCC(=O)O)N	-2.5		Organic acids and derivatives	Carboxylic acids and derivatives	Amino acids, peptides, and analogues	112395
5.65_503.1901m/z	Olivil 4'-O-Glucoside	C26H34O12	5.64507	-2.08259	503.19	pos	M+H-2H2O	14033815	SXGSYHDLSPXCMU-CTQTXEDXSA-N	COC1=C(C=CC(=C1)C[C@]2(CO[C@@H]([C@H]2CO)C3=CC(=C(C=C3)O)OC)O)O[C@H]4[C@@H]([C@H]([C@@H]([C@H](O4)CO)O)O)O	0.1		Lignans, neolignans and related compounds	Lignan glycosides		112141
0.81_90.0553m/z	Alanine	C3H7NO2	0.8108	3.88351	90.0553	pos	M+H	602	QNAYBMKLOCPYGJ-UHFFFAOYSA-N	CC(C(=O)O)N	-3	C01401	Organic acids and derivatives	Carboxylic acids and derivatives	Amino acids, peptides, and analogues	111824
8.13_333.2063m/z	5(S)-HpEPE	C20H30O4	8.13115	-2.5685	333.206	neg	M-H	5283184	NKXYOIJDQPQELO-GHWNLOBHSA-N	CC/C=C\C/C=C\C/C=C\C/C=C\C=C\[C@H](CCCC(=O)O)OO	4.6		Lipids and lipid-like molecules	Fatty Acyls	Eicosanoids	109477
7.02_297.0760m/z	5-O-Methylbiochanin A	C17H14O5	7.01782	-2.69387	297.076	neg	M-H	14308334	JQQULYXWXRNRAX-UHFFFAOYSA-N	COC1=CC=C(C=C1)C2=COC3=C(C2=O)C(=CC(=C3)O)OC	2.8		Phenylpropanoids and polyketides	Isoflavonoids	O-methylated isoflavonoids	109055
5.76_301.0336m/z	Isodemethylwedelolactone	C15H8O7	5.75683	-2.21423	301.034	pos	M+H	5318547	OBEHELRBTWMPHI-UHFFFAOYSA-N	C1=C(C=C(C2=C1C3=C(C4=CC(=C(C=C4O3)O)O)C(=O)O2)O)O	2.1		Phenylpropanoids and polyketides	Isoflavonoids	Coumestans	107130
5.18_325.0911m/z	Skimmin	C15H16O8	5.17893	-1.99345	325.091	pos	M+H	99693	VPAOSFFTKWUGAD-TVKJYDDYSA-N	C1=CC(=CC2=C1C=CC(=O)O2)O[C@H]3[C@@H]([C@H]([C@@H]([C@H](O3)CO)O)O)O	-0.7		Phenylpropanoids and polyketides	Coumarins and derivatives	Coumarin glycosides	103010
6.59_245.1379m/z	9-(2,3-Dihydroxypropoxy)-9-oxononanoic acid	C12H22O6	6.59313	-1.74935	245.138	pos	M+H-H2O	45783154	BQRISQXLSXCXSC-UHFFFAOYSA-N	C(CCCC(=O)O)CCCC(=O)OCC(CO)O	0.8		Lipids and lipid-like molecules	Fatty Acyls	Fatty acids and conjugates	102460
4.74_429.1327m/z	Morroniside	C17H26O11	4.73788	-9.89381	429.133	pos	M+Na	11228693	YTZSBJLNMIQROD-SFBCHFHNSA-N	C[C@H]1[C@@H]2[C@H](C[C@@H](O1)O)C(=CO[C@H]2O[C@H]3[C@@H]([C@H]([C@@H]([C@H](O3)CO)O)O)O)C(=O)OC	-1.8	C17000	Organic oxygen compounds	Organooxygen compounds	Carbohydrates and carbohydrate conjugates	100242
5.53_177.0553m/z	Coniferaldehyde	C10H10O3	5.52565	-2.53857	177.055	neg	M-H	5280536	DKZBBWMURDFHNE-NSCUHMNNSA-N	COC1=C(C=CC(=C1)/C=C/C=O)O	1.5	C02666	Benzenoids	Phenols	Methoxyphenols	99744.9
8.55_257.0814m/z	2',4',6'-Trihydroxydihydrochalcone	C15H14O4	8.55238	-2.17529	257.081	neg	M-H	1226045	QWQGMMRHTWIOGH-UHFFFAOYSA-N	C1=CC=C(C=C1)CCC(=O)C2=C(C=C(C=C2O)O)O	3	C09618	Phenylpropanoids and polyketides	Linear 1,3-diarylpropanoids	Chalcones and dihydrochalcones	97914
11.58_522.3543m/z	PC(18:1/0:0)	C26H52NO7P	11.5786	-2.06931	522.354	pos	M+H	16081932	YAMUFBLWGFFICM-PTGWMXDISA-N	CCCCCCCC/C=C\CCCCCCCC(=O)OC[C@H](COP(=O)([O-])OCC[N+](C)(C)C)O	5.7		Lipids and lipid-like molecules	Glycerophospholipids	Glycerophosphocholines	95960.6
5.22_225.0763m/z	Ethyl syringate	C11H14O5	5.21757	-2.35332	225.076	neg	M-H	19845	WKUVKFZZCHINKG-UHFFFAOYSA-N	CCOC(=O)C1=CC(=C(C(=C1)OC)O)OC	1.7		Benzenoids	Benzene and substituted derivatives	Benzoic acids and derivatives	93899.1
8.26_423.1289m/z	Campestrinoside	C20H24O10	8.25885	-1.79317	423.129	neg	M-H									93272.3
11.16_452.2772m/z	PE(16:0/0:0)	C21H44NO7P	11.1572	-2.42875	452.277	neg	M-H	9547069	YVYMBNSKXOXSKW-HXUWFJFHSA-N	CCCCCCCCCCCCCCCC(=O)OC[C@H](COP(=O)(O)OCCN)O	2.4		Lipids and lipid-like molecules	Glycerophospholipids	Glycerophosphoethanolamines	91745.8
10.95_313.2376m/z	9,10-Dihydroxy-12Z-octadecenoic acid	C18H34O4	10.9524	-2.53894	313.238	neg	M-H	9966640	XEBKSQSGNGRGDW-YFHOEESVSA-N	CCCCC/C=C\CC(C(CCCCCCCC(=O)O)O)O	4.6		Lipids and lipid-like molecules	Fatty Acyls	Fatty acids and conjugates	90085.7
7.49_317.0649m/z	3-O-Methylquercetin	C16H12O7	7.48722	-2.24022	317.065	pos	M+H	5280681	WEPBGSIAWZTEJR-UHFFFAOYSA-N	COC1=C(OC2=CC(=CC(=C2C1=O)O)O)C3=CC(=C(C=C3)O)O	2.5	C04443	Phenylpropanoids and polyketides	Flavonoids	O-methylated flavonoids	87400.7
5.95_161.0594m/z	6-Methylcoumarin	C10H8O2	5.94685	-1.96934	161.059	pos	M+H	7092	FXFYOPQLGGEACP-UHFFFAOYSA-N	CC1=CC2=C(C=C1)OC(=O)C=C2	1.8		Phenylpropanoids and polyketides	Coumarins and derivatives		84892.7
1.79_201.1240m/z	Alanylisoleucine	C9H18N2O3	1.78603	-2.51522	201.124	neg	M-H									84058.4
3.73_318.2016m/z	Ser Leu Val	C14H27N3O5	3.72937	-2.29113	318.202	pos	M+H	101769071	IXZHZUGGKLRHJD-DCAQKATOSA-N	CC(C)C[C@@H](C(=O)N[C@@H](C(C)C)C(=O)O)NC(=O)[C@H](CO)N	-2.3		Organic acids and derivatives	Carboxylic acids and derivatives	Amino acids, peptides, and analogues	83476.3
4.67_225.0864m/z	Hydroxykynurenine	C10H12N2O4	4.6731	-2.47593	225.086	pos	M+H	89	VCKPUUFAIGNJHC-UHFFFAOYSA-N	C1=CC(=C(C(=C1)O)N)C(=O)CC(C(=O)O)N	-2.5	C02794	Organic oxygen compounds	Organooxygen compounds	Carbonyl compounds	81175
4.23_261.1438m/z	gamma-Glutamylleucine	C11H20N2O5	4.2333	-2.54579	261.144	pos	M+H	151023	MYFMARDICOWMQP-YUMQZZPRSA-N	CC(C)C[C@@H](C(=O)O)NC(=O)CC[C@@H](C(=O)O)N	-2.4		Organic acids and derivatives	Carboxylic acids and derivatives	Amino acids, peptides, and analogues	80943.8
2.36_122.0964m/z	Phenethylamine	C8H11N	2.36202	-0.248526	122.096	pos	M+H					C05332				78549.9
7.01_138.0193m/z	2-Nitrophenol	C6H5NO3	7.00763	-2.38461	138.019	neg	M-H	6947	IQUPABOKLQSFBK-UHFFFAOYSA-N	C1=CC=C(C(=C1)[N+](=O)[O-])O	1.8	C01988	Benzenoids	Phenols	Nitrophenols	78196.5
5.23_626.1471n	Quercetin-3,4'-O-di-beta-glucoside	C27H30O17	5.22565	-1.89696	627.154	pos	M+H, M+Na	22630387	RPVIQWDFJPYNJM-UHFFFAOYSA-N	C1=CC(=C(C=C1C2=C(C(=O)C3=C(C=C(C=C3O2)O)O)OC4C(C(C(C(O4)CO)O)O)O)O)OC5C(C(C(C(O5)CO)O)O)O	-1.4	C05623	Phenylpropanoids and polyketides	Flavonoids	Flavonoid glycosides	77583.9
5.46_133.0646m/z	cinnamaldehyde	C9H8O	5.45875	-1.45893	133.065	pos	M+H	637511	KJPRLNWUNMBNBZ-QPJJXVBHSA-N	C1=CC=C(C=C1)/C=C/C=O	1.9	C00903	Phenylpropanoids and polyketides	Cinnamaldehydes		75751.5
11.60_365.2678m/z	1a,1b-dihomo PGF2Alpha	C22H38O5	11.6036	-2.24441	365.268	pos	M+H-H2O	6443812	ZCTAOAWRUXSOQF-GWSKAPOCSA-N	CCCCC[C@@H](/C=C/[C@H]1[C@@H](C[C@@H]([C@@H]1C/C=C\CCCCCC(=O)O)O)O)O	3.8		Lipids and lipid-like molecules	Fatty Acyls	Eicosanoids	73505.1
5.47_449.1073m/z	Luteolin 4'-glucoside	C21H20O11	5.46925	-1.19107	449.107	pos	M+H	12304737	UHNXUSWGOJMEFO-UHFFFAOYSA-N	C1=CC(=C(C=C1C2=CC(=O)C3=C(C=C(C=C3O2)O)O)O)OC4C(C(C(C(O4)CO)O)O)O	0.5		Phenylpropanoids and polyketides	Flavonoids	Flavonoid glycosides	73072.4
5.17_244.0878n	biotin	C10H16N2O3S	5.16785	-1.49061	245.095	pos	M+H-H2O, M+H	171548	YBJHBAHKTGYVGT-ZKWXMUAHSA-N	C1[C@H]2[C@@H]([C@@H](S1)CCCCC(=O)O)NC(=O)N2	0.3	C00120	Organoheterocyclic compounds	Biotin and derivatives		69964.2
3.97_280.1053n	Asp Phe	C13H16N2O5	3.96703	-2.28402	281.113	pos	M+H, M+Na									69170.9
6.37_160.0400m/z	2-Indolecarboxylic acid	C9H7NO2	6.3669	-2.73444	160.04	neg	M-H	72899	HCUARRIEZVDMPT-UHFFFAOYSA-N	C1=CC=C2C(=C1)C=C(N2)C(=O)O	2.3		Organoheterocyclic compounds	Indoles and derivatives	Indolecarboxylic acids and derivatives	68760.2
11.77_365.2677m/z	16,16-dimethyl-PGE1	C22H38O5	11.7668	-2.37795	365.268	pos	M+H-H2O	5283058	RQOFITYRYPQNLL-ZWSAOQBFSA-N	CCCCC(C)(C)[C@@H](/C=C/[C@H]1[C@@H](CC(=O)[C@@H]1CCCCCCC(=O)O)O)O	4		Lipids and lipid-like molecules	Fatty Acyls	Eicosanoids	68389.1
7.37_207.0648m/z	Scoparone	C11H10O4	7.36903	-2.0089	207.065	pos	M+H	8417	GUAFOGOEJLSQBT-UHFFFAOYSA-N	COC1=C(C=C2C(=C1)C=CC(=O)O2)OC	1.9	C09311	Phenylpropanoids and polyketides	Coumarins and derivatives		68352.5
6.15_301.0336m/z	myricetin	C15H10O8	6.1472	-2.10564	301.034	pos	M+H-H2O	5281672	IKMDFBPHZNJCSN-UHFFFAOYSA-N	C1=C(C=C(C(=C1O)O)O)C2=C(C(=O)C3=C(C=C(C=C3O2)O)O)O	1.2	C10107	Phenylpropanoids and polyketides	Flavonoids	Flavones	68128.8
7.83_303.1595m/z	2,6-dihydroxy-7-methoxy-1,1,4a-trimethyl-3,4,10,10a-tetrahydro-2H-phenanthren-9-one	C18H24O4	7.83223	-2.40858	303.159	neg	M-H									62782.5
10.04_468.3074m/z	PC(14:0/0:0)	C22H46NO7P	10.0355	-2.31023	468.307	pos	M+H	24779456	JXGLGTFMAQOJBB-HEDKFQSOSA-N	CCCC/C=C\CCCCCCCC(=O)OC[C@H](COP(=O)([O-])OCC[N+](C)(C)C)O	3.5		Lipids and lipid-like molecules	Glycerophospholipids	Glycerophosphocholines	62470.4
4.59_341.1376m/z	Clemaphenol A	C20H22O6	4.59303	-2.12413	341.138	pos	M+H-H2O	46173999	VRHZMFGDDGFRLP-AFHBHXEDSA-N	COC1=C(C=C(C=C1)[C@@H]2[C@H]3CO[C@@H]([C@H]3CO2)C4=CC(=C(C=C4)OC)O)O	2.3	C17808	Lignans, neolignans and related compounds	Furanoid lignans		60878.2
5.53_360.2119m/z	Asp Ile Ile	C16H29N3O6	5.5345	-2.68238	360.212	pos	M+H	145454467	NHSDEZURHWEZPN-SXTJYALSSA-N	CC[C@H](C)[C@@H](C(=O)N[C@@H]([C@@H](C)CC)C(=O)O)NC(=O)[C@H](CC(=O)O)N	-3.3		Organic acids and derivatives	Carboxylic acids and derivatives	Amino acids, peptides, and analogues	59756.4
9.80_299.1998m/z	14-Deoxyandrographolide	C20H30O4	9.79925	-2.21486	299.2	pos	M+H-2H2O	11624161	GVRNTWSGBWPJGS-YSDSKTICSA-N	C[C@@]12CC[C@H]([C@@]([C@H]1CCC(=C)[C@H]2CCC3=CCOC3=O)(C)CO)O	3.4		Lipids and lipid-like molecules	Prenol lipids	Terpene lactones	59016.1
11.53_219.1739m/z	Muurolladie-3-One	C15H22O	11.5287	-2.1023	219.174	pos	M+H	3989419	LMILVXQXGKTFSZ-UHFFFAOYSA-N	CC1=CCC(C2C1CC(=O)C(=C2)C)C(C)C	3.2		Lipids and lipid-like molecules	Prenol lipids	Sesquiterpenoids	55324.9
10.77_277.2163m/z	13-Hydroxy-9Z,11E-octadecadienoic acid	C18H32O3	10.7738	-3.32933	277.216	neg	M-H2O-H	5282947	HNICUWMFWZBIFP-BSZOFBHHSA-N	CCCCCC(/C=C/C=C\CCCCCCCC(=O)O)O	5.3	C04056	Lipids and lipid-like molecules	Fatty Acyls	Lineolic acids and derivatives	55170.3
4.38_222.0764m/z	Acetyl-Tyrosine	C11H13NO4	4.37607	-3.4315	222.076	neg	M-H	68310	CAHKINHBCWCHCF-JTQLQIEISA-N	CC(=O)N[C@@H](CC1=CC=C(C=C1)O)C(=O)O	-0.2		Organic acids and derivatives	Carboxylic acids and derivatives	Amino acids, peptides, and analogues	52724.3
7.92_137.1322m/z	beta-Myrcene	C10H16	7.92032	-2.11185	137.132	pos	M+H	31253	UAHWPYUMFXYFJY-UHFFFAOYSA-N	CC(=CCCC(=C)C=C)C	4.3	C06074	Lipids and lipid-like molecules	Prenol lipids	Monoterpenoids	50243.1
4.53_293.1139m/z	Glutamylphenylalanine	C14H18N2O5	4.52912	-1.50468	293.114	neg	M-H	111299	XHHOHZPNYFQJKL-QWRGUYRKSA-N	C1=CC=C(C=C1)C[C@@H](C(=O)O)NC(=O)CC[C@@H](C(=O)O)N	-3		Organic acids and derivatives	Carboxylic acids and derivatives	Amino acids, peptides, and analogues	49833.7
15.03_218.0154m/z	Arecoline hydrobromide	C8H14BrNO2	15.0281	-9.03877	218.015	pos	M+H-H2O									49114.8
1.89_207.1125m/z	(S)-alpha-Amino-beta-phenylpropionicacid	C9H11NO2	1.89043	-1.71084	207.113	pos	M+ACN+H					C00079				47563.8
7.50_315.0503m/z	6-Methoxyluteolin	C16H12O7	7.49582	-2.19427	315.05	neg	M-H	5317284	FHHSEFRSDKWJKJ-UHFFFAOYSA-N	COC1=C(C2=C(C=C1O)OC(=CC2=O)C3=CC(=C(C=C3)O)O)O	1.4		Phenylpropanoids and polyketides	Flavonoids	O-methylated flavonoids	46259.9
8.80_218.9616m/z	2,4-Dichlorophenoxyacetic acid	C8H6Cl2O3	8.80318	-2.51552	218.962	neg	M-H	1486	OVSKIKFHRZPJSS-UHFFFAOYSA-N	C1=CC(=C(C=C1Cl)Cl)OCC(=O)O	2.8	C03664	Benzenoids	Benzene and substituted derivatives	Phenoxyacetic acid derivatives	45287.1
8.92_160.0521n	4-Methylcoumarin	C10H8O2	8.91708	-2.06434	193.086	pos	M+H, M+CH3OH+H	11833	PSGQCCSGKGJLRL-UHFFFAOYSA-N	CC1=CC(=O)OC2=CC=CC=C12	2.3		Phenylpropanoids and polyketides	Coumarins and derivatives		45252.9
9.34_287.1385m/z	(2-methoxyphenyl)-[2-(5-methyl-1,2-oxazol-3-yl)pyrrolidin-1-yl]methanone	C16H18N2O3	9.33643	-1.76233	287.139	pos	M+H									45194
0.77_118.0507m/z	Threonine	C4H9NO3	0.765683	-2.41894	118.051	neg	M-H	6288	AYFVYJQAPQTCCC-GBXIJSLDSA-N	C[C@H]([C@@H](C(=O)O)N)O	-2.9	C00188	Organic acids and derivatives	Carboxylic acids and derivatives	Amino acids, peptides, and analogues	44049.2
10.79_303.1583m/z	Nordihydroguaiaretic acid	C18H22O4	10.7931	-2.54267	303.158	pos	M+H	4534	HCZKYJDFEPMADG-UHFFFAOYSA-N	CC(CC1=CC(=C(C=C1)O)O)C(C)CC2=CC(=C(C=C2)O)O	4.3	C10719	Lignans, neolignans and related compounds	Dibenzylbutane lignans		44047.4
7.35_359.0765m/z	Jaceidin	C18H16O8	7.3489	-2.0693	359.076	neg	M-H	5464461	XUWTZJRCCPNNJR-UHFFFAOYSA-N	COC1=C(C=CC(=C1)C2=C(C(=O)C3=C(O2)C=C(C(=C3O)OC)O)OC)O	2.8		Phenylpropanoids and polyketides	Flavonoids	O-methylated flavonoids	43549.4
4.13_382.1712m/z	Trans-Zeatin-o-glucoside	C16H23N5O6	4.1318	-2.51039	382.171	pos	M+H	5461146	UUPDCCPAOMDMPT-HNVSNYHQSA-N	C/C(=C\CNC1=NC=NC2=C1NC=N2)/CO[C@H]3[C@@H]([C@H]([C@@H]([C@H](O3)CO)O)O)O	-0.9	C03423	Lipids and lipid-like molecules	Fatty Acyls	Fatty acyl glycosides	43024.8
5.19_565.1554m/z	Corymboside	C26H28O14	5.19045	0.300749	565.155	pos	M+H	13644660	OVMFOVNOXASTPA-UHFFFAOYSA-N	C1C(C(C(C(O1)C2=C(C(=C3C(=C2O)C(=O)C=C(O3)C4=CC=C(C=C4)O)C5C(C(C(C(O5)CO)O)O)O)O)O)O)O	-2.2		Phenylpropanoids and polyketides	Flavonoids	Flavonoid glycosides	42317
7.01_195.1012m/z	Methoxyeugenol	C11H14O3	7.01192	-1.69032	195.101	pos	M+H	226486	FWMPKHMKIJDEMJ-UHFFFAOYSA-N	COC1=CC(=CC(=C1O)OC)CC=C	2.6		Benzenoids	Phenols	Methoxyphenols	42099
1.07_211.0595m/z	7,8-Dihydroxycoumarin	C9H6O4	1.07498	-3.28826	211.06	pos	M+CH3OH+H	5280569	ATEFPOUAMCWAQS-UHFFFAOYSA-N	C1=CC(=C(C2=C1C=CC(=O)O2)O)O	1.2	C03093	Phenylpropanoids and polyketides	Coumarins and derivatives	Hydroxycoumarins	41852.1
10.80_359.1116m/z	Gardenin B	C19H18O7	10.8045	-2.72598	359.112	pos	M+H	96539	LXEVSYZNYDZSOB-UHFFFAOYSA-N	COC1=CC=C(C=C1)C2=CC(=O)C3=C(C(=C(C(=C3O2)OC)OC)OC)O	3.3	C15109	Phenylpropanoids and polyketides	Flavonoids	O-methylated flavonoids	40038.4
4.66_182.0455m/z	4-Pyridoxic acid	C8H9NO4	4.65563	-2.28415	182.045	neg	M-H	6723	HXACOUQIXZGNBF-UHFFFAOYSA-N	CC1=NC=C(C(=C1O)C(=O)O)CO	0.1	C00847	Organoheterocyclic compounds	Pyridines and derivatives	Pyridinecarboxylic acids and derivatives	38824.5
8.93_255.1584m/z	Gliocladic acid	C14H22O4	8.92902	-2.56588	255.158	pos	M+H	6439616	SLVSUVFUFJKMCV-MZGZCWAVSA-N	CC(C)[C@@H]1CCC(=C[C@H]1/C=C(\CO)/C(=O)O)CO	1.1		Lipids and lipid-like molecules	Prenol lipids	Monoterpenoids	36971.5
0.91_383.1183m/z	Quinic acid	C7H12O6	0.91045	-3.07894	383.118	neg	2M-H	6508	AAWZDTNXLSGCEK-LNVDRNJUSA-N	C1[C@H](C([C@@H](CC1(C(=O)O)O)O)O)O	-2.4	C00296	Organic oxygen compounds	Organooxygen compounds	Alcohols and polyols	35673.3
6.92_339.1228m/z	alpha-guaiaconic acid	C20H20O5	6.92015	-2.89214	339.123	neg	M-H	165795	OIXPKFRMEUTHOG-UHFFFAOYSA-N	CC1=C(OC(=C1C)C2=CC(=C(C=C2)O)OC)C3=CC(=C(C=C3)O)OC	4.3		Organoheterocyclic compounds	Furans	Diphenylfurans	35371
5.77_165.0543m/z	4-Hydroxycinnamic acid	C9H8O3	5.76893	-1.96814	165.054	pos	M+H	637542	NGSWKAQJJWESNS-ZZXKWVIFSA-N	C1=CC(=CC=C1/C=C/C(=O)O)O	1.5	C00811	Phenylpropanoids and polyketides	Cinnamic acids and derivatives	Hydroxycinnamic acids and derivatives	35325.4
9.10_387.2269m/z	MDL 72832 HCL	C22H30N2O4	9.10157	-2.29669	387.227	pos	M+H									34112.7
12.78_169.0140m/z	Gallic acid	C7H6O5	12.776	-1.45982	169.014	neg	M-H	370	LNTHITQWFMADLM-UHFFFAOYSA-N	C1=C(C=C(C(=C1O)O)O)C(=O)O	0.7	C01424	Benzenoids	Benzene and substituted derivatives	Benzoic acids and derivatives	33361.6
10.61_482.3234m/z	PC(15:0/0:0)	C23H48NO7P	10.6101	-1.56104	482.323	pos	M+H	24779458	RJZVWDTYEWCUAR-JOCHJYFZSA-N	CCCCCCCCCCCCCCC(=O)OC[C@H](COP(=O)([O-])OCC[N+](C)(C)C)O	5		Lipids and lipid-like molecules	Glycerophospholipids	Glycerophosphocholines	33100.4
10.15_480.3076m/z	PC(15:1/0:0)	C23H46NO7P	10.1516	-1.7664	480.308	pos	M+H	24779458	RJZVWDTYEWCUAR-JOCHJYFZSA-N	CCCCCCCCCCCCCCC(=O)OC[C@H](COP(=O)([O-])OCC[N+](C)(C)C)O	5		Lipids and lipid-like molecules	Glycerophospholipids	Glycerophosphocholines	32855.6
0.90_187.0720m/z	NAlpha-Acetyl-L-glutamine	C7H12N2O4	0.899833	-2.51338	187.072	neg	M-H	182230	KSMRODHGGIIXDV-YFKPBYRVSA-N	CC(=O)N[C@@H](CCC(=O)N)C(=O)O	-1.4		Organic acids and derivatives	Carboxylic acids and derivatives	Amino acids, peptides, and analogues	32652.5
4.98_251.1385m/z	Feruloyl allylamine	C13H15NO3	4.9849	-2.11476	251.139	pos	M+NH4	139291976	NAYMCRXFMBIDTH-FNORWQNLSA-N	COC1=C(C=CC(=C1)/C=C/C(=O)NCC=C)O	1.9					30250.2
6.14_247.1071m/z	N-Acetyl-tryptophan	C13H14N2O3	6.13697	-2.39291	247.107	pos	M+H	700653	DZTHIGRZJZPRDV-LBPRGKRZSA-N	CC(=O)N[C@@H](CC1=CNC2=CC=CC=C21)C(=O)O	1.1	C03137	Organic acids and derivatives	Carboxylic acids and derivatives	Amino acids, peptides, and analogues	29609.8
0.86_323.0277m/z	Uridine 5'-monophosphate	C9H13N2O9P	0.861783	-2.8557	323.028	neg	M-H	6030	DJJCXFVJDGTHFX-XVFCMESISA-N	C1=CN(C(=O)NC1=O)[C@H]2[C@@H]([C@@H]([C@H](O2)COP(=O)(O)O)O)O	-3.6	C00105	Nucleosides, nucleotides, and analogues	Pyrimidine nucleotides	Pyrimidine ribonucleotides	29382
6.09_191.0699m/z	6-Methoxy-4-methylcoumarin	C11H10O3	6.09282	-2.09148	191.07	pos	M+H	223821	KNGPIBWCWOQBEK-UHFFFAOYSA-N	CC1=CC(=O)OC2=C1C=C(C=C2)OC	2.2		Phenylpropanoids and polyketides	Coumarins and derivatives		29089.5
7.55_345.0606m/z	5,7,3',4'-Tetrahydroxy-6,8-dimethoxyflavone	C17H14O8	7.54962	-2.86808	345.061	neg	M-H	5321859	GLMWHQIFJIURES-UHFFFAOYSA-N	COC1=C(C(=C2C(=C1O)C(=O)C=C(O2)C3=CC(=C(C=C3)O)O)OC)O	2.3	C04581	Phenylpropanoids and polyketides	Flavonoids	O-methylated flavonoids	27872.8
1.03_188.0560m/z	N-Acetyl-L-glutamic acid	C7H11NO5	1.02993	-2.54333	188.056	neg	M-H	70914	RFMMMVDNIPUKGG-YFKPBYRVSA-N	CC(=O)N[C@@H](CCC(=O)O)C(=O)O	-1.8	C00624	Organic acids and derivatives	Carboxylic acids and derivatives	Amino acids, peptides, and analogues	27818
8.00_317.0648m/z	Isorhamnetin	C16H12O7	8.00352	-2.45512	317.065	pos	M+H	5281654	IZQSVPBOUDKVDZ-UHFFFAOYSA-N	COC1=C(C=CC(=C1)C2=C(C(=O)C3=C(C=C(C=C3O2)O)O)O)O	1.9	C10084	Phenylpropanoids and polyketides	Flavonoids	Flavones	27166.2
11.38_296.2577m/z	linolenic acid	C18H30O2	11.3811	-2.47055	296.258	pos	M+NH4	5280934	DTOSIQBPPRVQHS-PDBXOOCHSA-N	CC/C=C\C/C=C\C/C=C\CCCCCCCC(=O)O	5.9	C01595	Lipids and lipid-like molecules	Fatty Acyls	Lineolic acids and derivatives	26189.2
7.79_247.1334m/z	Pechueloic Acid	C15H20O3	7.79167	-2.40411	247.133	neg	M-H	24094149	ZFHSKBJBODQVBX-AXTRIDKLSA-N	C[C@H]1CC[C@H](CC2=C(C(=O)C[C@@H]12)C)C(=C)C(=O)O	2.4		Lipids and lipid-like molecules	Prenol lipids	Sesquiterpenoids	24399.9
4.70_337.1017m/z	N-[4-(dimethylsulfamoyl)phenyl]-2-(4-fluorophenyl)acetamide	C16H17FN2O3S	4.6955	0.00232897	337.102	pos	M+H									23993.4
3.74_282.1190m/z	N6-Methyladenosine	C11H15N5O4	3.73987	-2.30331	282.119	pos	M+H	102175	VQAYFKKCNSOZKM-IOSLPCCCSA-N	CNC1=C2C(=NC=N1)N(C=N2)[C@H]3[C@@H]([C@@H]([C@H](O3)CO)O)O	-0.4		Nucleosides, nucleotides, and analogues	Purine nucleosides		23363.6
5.81_397.1487m/z	[3-[2-(4-fluoroanilino)pyrimidin-4-yl]piperidin-1-yl]-(5-methylthiophen-2-yl)methanone	C21H21FN4OS	5.81235	-1.48132	397.149	pos	M+H									23196.5
10.39_263.2363m/z	Farnesyl acetone	C18H30O	10.3907	-2.33539	263.236	pos	M+H	1711945	LTUMRKDLVGQMJU-IUBLYSDUSA-N	CC(=CCC/C(=C/CC/C(=C/CCC(=O)C)/C)/C)C	5.6		Lipids and lipid-like molecules	Prenol lipids	Diterpenoids	22804.5
14.79_192.1378m/z	N-Ethyl-N-Methylcathinone	C12H17NO	14.7949	-2.41443	192.138	pos	M+H	43794825	LOQPFJRCXJZNQV-UHFFFAOYSA-N	CCN(C)C(C)C(=O)C1=CC=CC=C1	2.4		Organic oxygen compounds	Organooxygen compounds	Carbonyl compounds	20781.3
7.99_315.0504m/z	Rhamnetin	C16H12O7	7.99383	-1.89989	315.05	neg	M-H	5281691	JGUZGNYPMHHYRK-UHFFFAOYSA-N	COC1=CC(=C2C(=C1)OC(=C(C2=O)O)C3=CC(=C(C=C3)O)O)O	1.9	C10176	Phenylpropanoids and polyketides	Flavonoids	Flavones	20609.3
5.39_369.1173m/z	3-O-Feruloylquinic acid	C17H20O9	5.3928	-1.94776	369.117	pos	M+H	9799386	RAGZUCNPTLULOL-KJJWLSQTSA-N	COC1=C(C=CC(=C1)/C=C/C(=O)O[C@@H]2C[C@@](C[C@H]([C@H]2O)O)(C(=O)O)O)O	-0.1	C02572	Organic oxygen compounds	Organooxygen compounds	Alcohols and polyols	20492.3
5.29_447.0922m/z	Isoorientin	C21H20O11	5.28958	-2.32403	447.092	neg	M-H	114776	ODBRNZZJSYPIDI-VJXVFPJBSA-N	C1=CC(=C(C=C1C2=CC(=O)C3=C(O2)C=C(C(=C3O)[C@H]4[C@@H]([C@H]([C@@H]([C@H](O4)CO)O)O)O)O)O)O	-0.2	C01821	Phenylpropanoids and polyketides	Flavonoids	Flavonoid glycosides	19670.7
6.39_424.1271m/z	1-(4-oxo-4h-chromen-3-yl)-2,3,4,9-tetrahydro-1h-beta-carboline-3-carboxylic acid	C21H16N2O4	6.39213	0.994421	424.127	pos	M+ACN+Na									19495
12.48_205.1947m/z	gamma-Cadinene	C15H24	12.4766	-2.08135	205.195	pos	M+H	92313	WRHGORWNJGOVQY-RBSFLKMASA-N	CC1=C[C@H]2[C@H](CC1)C(=C)CC[C@@H]2C(C)C	4.3	C19738	Lipids and lipid-like molecules	Prenol lipids	Sesquiterpenoids	18406
14.87_175.1186m/z	L-Arginine	C6H14N4O2	14.8731	-1.82563	175.119	pos	M+H	6322	ODKSFYDXXFIFQN-BYPYZUCNSA-N	C(C[C@@H](C(=O)O)N)CN=C(N)N	-4.2	C00062	Organic acids and derivatives	Carboxylic acids and derivatives	Amino acids, peptides, and analogues	18202.6
4.83_287.0542m/z	Scutellarein	C15H10O6	4.82712	-2.77809	287.054	pos	M+H	5281697	JVXZRQGOGOXCEC-UHFFFAOYSA-N	C1=CC(=CC=C1C2=CC(=O)C3=C(O2)C=C(C(=C3O)O)O)O	1.4	C10184	Phenylpropanoids and polyketides	Flavonoids	Flavones	18156.4
5.67_433.1126m/z	Vitexin	C21H20O10	5.66643	-0.732791	433.113	pos	M+H	5280441	SGEWCQFRYRRZDC-VPRICQMDSA-N	C1=CC(=CC=C1C2=CC(=O)C3=C(O2)C(=C(C=C3O)O)[C@H]4[C@@H]([C@H]([C@@H]([C@H](O4)CO)O)O)O)O	0.2	C01460	Phenylpropanoids and polyketides	Flavonoids	Flavonoid glycosides	17418
7.91_331.0804m/z	3,7-Di-O-methylquercetin	C17H14O7	7.90968	-2.40999	331.08	pos	M+H	5280417	LUJAXSNNYBCFEE-UHFFFAOYSA-N	COC1=CC(=C2C(=C1)OC(=C(C2=O)OC)C3=CC(=C(C=C3)O)O)O	2.8	C01265	Phenylpropanoids and polyketides	Flavonoids	O-methylated flavonoids	17239.6
8.18_175.0396m/z	4-Methylumbelliferone	C10H8O3	8.18495	-2.50269	175.04	neg	M-H	5280567	HSHNITRMYYLLCV-UHFFFAOYSA-N	CC1=CC(=O)OC2=C1C=CC(=C2)O	1.9	C03081	Phenylpropanoids and polyketides	Coumarins and derivatives	Hydroxycoumarins	17026.9
6.30_461.0717m/z	Kaempferol 3-glucuronoside	C21H18O12	6.30258	-1.88778	461.072	neg	M-H	22846027	FNTJVYCFNVUBOL-MBIBTLSJSA-N	C1=CC(=CC=C1C2=C(C(=O)C3=C(C=C(C=C3O2)O)O)OC4[C@@H]([C@H]([C@@H]([C@H](O4)C(=O)O)O)O)O)O	1		Phenylpropanoids and polyketides	Flavonoids	Flavonoid glycosides	16666.5
13.41_271.2271m/z	2-hydroxyhexadecanoic acid	C16H32O3	13.4103	-2.77141	271.227	neg	M-H	92836	JGHSBPIZNUXPLA-UHFFFAOYSA-N	CCCCCCCCCCCCCCC(C(=O)O)O	6.4		Lipids and lipid-like molecules	Fatty Acyls	Fatty acids and conjugates	14889.3
4.47_160.1329m/z	DL-2-Aminooctanoic acid	C8H17NO2	4.46777	-1.66601	160.133	pos	M+H	69522	AKVBCGQVQXPRLD-UHFFFAOYSA-N	CCCCCCC(C(=O)O)N	-0.5		Organic acids and derivatives	Carboxylic acids and derivatives	Amino acids, peptides, and analogues	14731.2
0.72_147.0528n	L-glutamic acid	C5H9NO4	0.717533	-2.32084	146.046	neg	M-H, M+K-2H	33032	WHUUTDBJXJRKMK-VKHMYHEASA-N	C(CC(=O)O)[C@@H](C(=O)O)N	-3.7	C00025	Organic acids and derivatives	Carboxylic acids and derivatives	Amino acids, peptides, and analogues	14667.1
9.59_177.0543m/z	Monoethyl phthalate	C10H10O4	9.5857	-1.74231	177.054	pos	M+H-H2O	75318	YWWHKOHZGJFMIE-UHFFFAOYSA-N	CCOC(=O)C1=CC=CC=C1C(=O)O	1.8		Benzenoids	Benzene and substituted derivatives	Benzoic acids and derivatives	14545.3
5.69_507.1123m/z	Quercetin 3-(6-O-acetyl-beta-glucoside)	C23H22O13	5.68698	-2.0337	507.112	pos	M+H	10006384	IGLUNMMNDNWZOA-LNNZMUSMSA-N	CC(=O)OC[C@@H]1[C@H]([C@@H]([C@H]([C@@H](O1)OC2=C(OC3=CC(=CC(=C3C2=O)O)O)C4=CC(=C(C=C4)O)O)O)O)O	0.4		Phenylpropanoids and polyketides	Flavonoids	Flavonoid glycosides	14458.7
11.49_198.1041n	o-Methylbenzhydrol	C14H14O	11.4919	-2.07245	181.101	pos	M+H-H2O, M+H	95659	MXHXXJOHFRHBFB-UHFFFAOYSA-N	CC1=CC=CC=C1C(C2=CC=CC=C2)O	3.1		Benzenoids	Benzene and substituted derivatives	Diphenylmethanes	13781.9
0.89_348.0695m/z	3'-AMP	C10H14N5O7P	0.89425	-2.50979	348.069	pos	M+H	41211	LNQVTSROQXJCDD-KQYNXXCUSA-N	C1=NC(=C2C(=N1)N(C=N2)[C@H]3[C@@H]([C@@H]([C@H](O3)CO)OP(=O)(O)O)O)N	-2.7	C01367	Nucleosides, nucleotides, and analogues	Ribonucleoside 3'-phosphates		13737.2
4.31_465.1026m/z	Glucodistylin	C21H22O12	4.31108	-2.68753	465.103	neg	M-H	14187088	FVQOMEDMFUMIMO-UHFFFAOYSA-N	C1=CC(=C(C=C1C2C(C(=O)C3=C(C=C(C=C3O2)O)O)OC4C(C(C(C(O4)CO)O)O)O)O)O	-0.1		Phenylpropanoids and polyketides	Flavonoids	Flavonoid glycosides	13134.1
8.08_177.0542m/z	ferulic acid	C10H10O4	8.07818	-1.91609	177.054	pos	M+H-H2O	445858	KSEBMYQBYZTDHS-HWKANZROSA-N	COC1=C(C=CC(=C1)/C=C/C(=O)O)O	1.5	C01494	Phenylpropanoids and polyketides	Cinnamic acids and derivatives	Hydroxycinnamic acids and derivatives	12009.6
9.67_193.0492m/z	scopoletin	C10H8O4	9.66895	-1.72739	193.049	pos	M+H	5280460	RODXRVNMMDRFIK-UHFFFAOYSA-N	COC1=C(C=C2C(=C1)C=CC(=O)O2)O	1.5	C01752	Phenylpropanoids and polyketides	Coumarins and derivatives	Hydroxycoumarins	11553.3
8.31_261.1115m/z	7-O-Prenylscopoletin	C15H16O4	8.30978	-2.28276	261.112	pos	M+H	1764914	ZLPLFUBVEZVYDX-UHFFFAOYSA-N	CC(=CCOC1=C(C=C2C=CC(=O)OC2=C1)OC)C	3.4		Phenylpropanoids and polyketides	Coumarins and derivatives		10754.2
5.36_206.0808m/z	Indolelactic acid	C11H11NO3	5.35922	-1.70684	206.081	pos	M+H	92904	XGILAAMKEQUXLS-UHFFFAOYSA-N	C1=CC=C2C(=C1)C(=CN2)CC(C(=O)O)O	1.5		Organoheterocyclic compounds	Indoles and derivatives	Indolyl carboxylic acids and derivatives	10073.5
10.10_247.1334m/z	5,9-dihydroxy-5,7,7-trimethyl-4,5a,6,8,8a,9-hexahydro-1H-azuleno[5,6-c]furan-3-one	C15H22O4	10.0972	-1.9485	247.133	neg	M-H2O-H	156145	MWDNWQAVYQDZQI-UHFFFAOYSA-N	CC1(CC2C(C1)C(CC3=C(C2O)C(OC3=O)O)(C)O)C	0.2		Lipids and lipid-like molecules	Prenol lipids	Terpene lactones	9043.05
14.78_311.1256m/z	Cl-Amidine	C14H19ClN4O2	14.7823	-4.40048	311.126	pos	M+H					C06060				8857.19
0.71_132.0299m/z	L-aspartic acid	C4H7NO4	0.706783	-2.2517	132.03	neg	M-H	5960	CKLJMWTZIZZHCS-REOHCLBHSA-N	C([C@@H](C(=O)O)N)C(=O)O	-2.8	C00049	Organic acids and derivatives	Carboxylic acids and derivatives	Amino acids, peptides, and analogues	8779.04
4.17_374.2277m/z	Ile Leu Glu	C17H31N3O6	4.16655	-2.26851	374.228	pos	M+H	145456189	HUORUFRRJHELPD-MNXVOIDGSA-N	CC[C@H](C)[C@@H](C(=O)N[C@@H](CC(C)C)C(=O)N[C@@H](CCC(=O)O)C(=O)O)N	-1.7		Organic acids and derivatives	Carboxylic acids and derivatives	Amino acids, peptides, and analogues	8596.05
10.08_170.0727n	2-Hyroxybiphenyl	C12H10O	10.0821	-2.9801	171.08	pos	M+H, M+ACN+H, M+H-H2O					C02499				8513.43
10.08_158.0729n	1-Naphthylmethanol	C11H10O	10.0821	-1.9841	141.07	pos	M+H-H2O, M+H									6079.37
3.94_314.2068m/z	Pro Val Val	C15H27N3O4	3.94425	-2.07209	314.207	pos	M+H	15199694	FHJQROWZEJFZPO-SRVKXCTJSA-N	CC(C)[C@@H](C(=O)N[C@@H](C(C)C)C(=O)O)NC(=O)[C@@H]1CCCN1	-2.2		Organic acids and derivatives	Carboxylic acids and derivatives	Amino acids, peptides, and analogues	5361.88
8.48_369.1324m/z	Isopsoralidin	C20H16O5	8.48395	-2.51488	369.132	pos	M+CH3OH+H	12304285	JWCDJOWFOVBBCP-UHFFFAOYSA-N	CC1(CCC2=CC3=C(C=C2O1)OC(=O)C4=C3OC5=C4C=CC(=C5)O)C	4.1		Phenylpropanoids and polyketides	Isoflavonoids	Coumestans	4138.14
16.64_99.0449m/z	Tiglic acid	C5H8O2	16.6389	-2.16172	99.0449	neg	M-H	125468	UIERETOOQGIECD-ONEGZZNKSA-N	C/C=C(\C)/C(=O)O	1	C08279	Lipids and lipid-like molecules	Fatty Acyls	Fatty acids and conjugates	4017.85
6.82_311.1271m/z	15,16-Dihydrotanshinone I	C18H14O3	6.81825	-2.54853	311.127	pos	M+CH3OH+H	11425923	HARGZZNYNSYSGJ-JTQLQIEISA-N	C[C@H]1COC2=C1C(=O)C(=O)C3=C2C=CC4=C(C=CC=C43)C	3.2		Lipids and lipid-like molecules	Prenol lipids	Diterpenoids	3746.95
5.50_433.1130m/z	Hemiphloin	C21H22O10	5.49628	-2.4104	433.113	neg	M-H	160711	QKPKGDDHOGIEOO-JVVVWQBKSA-N	C1[C@H](OC2=C(C1=O)C(=C(C(=C2)O)[C@H]3[C@@H]([C@H]([C@@H]([C@H](O3)CO)O)O)O)O)C4=CC=C(C=C4)O	-0.1		Phenylpropanoids and polyketides	Flavonoids	Flavonoid glycosides	2575.31
5.01_491.1175m/z	Cyanidin 3-(6''-acetylglucoside)	C23H22O12	5.00887	-1.78009	491.118	pos	M+H									2180.16
7.89_329.0659m/z	3,6-Dimethoxyapigenin	C17H14O7	7.88715	-2.33255	329.066	neg	M-H									2139.61
7.17_327.1220m/z	7-Acetoxy-2-methylisoflavone	C18H14O4	7.17002	-2.53229	327.122	pos	M+CH3OH+H									1790.99
5.60_401.1081m/z	Gentiopicroside	C16H20O9	5.59642	-2.32703	401.108	neg	M+FA-H	88708	DUAGQYUORDTXOR-GPQRQXLASA-N	C=C[C@H]1[C@@H](OC=C2C1=CCOC2=O)O[C@H]3[C@@H]([C@H]([C@@H]([C@H](O3)CO)O)O)O	-1.2	C09782	Organic oxygen compounds	Organooxygen compounds	Carbohydrates and carbohydrate conjugates	1445.65
7.53_269.0812m/z	2',5'-Dihydroxy-4-methoxychalcone	C16H14O4	7.52822	-2.64447	269.081	neg	M-H									1327.13
6.35_147.0449m/z	3-Isochromanone	C9H8O2	6.35462	-2.03498	147.045	neg	M-H					C07728				1215.74
4.70_401.1069m/z	4-(4-chlorophenoxy)-N-[5-methyl-4-(4-methylphenyl)-1,3-thiazol-2-yl]butanamide	C21H21ClN2O2S	4.6955	-4.00735	401.107	pos	M+H									1214.88
7.86_353.1373m/z	Corylin	C20H16O4	7.86372	-3.1972	353.137	pos	M+CH3OH+H	5316097	PWAACAMQKVIVPZ-UHFFFAOYSA-N	CC1(C=CC2=C(O1)C=CC(=C2)C3=COC4=C(C3=O)C=CC(=C4)O)C	3.7		Phenylpropanoids and polyketides	Isoflavonoids	Pyranoisoflavonoids	937.002
6.38_306.1362m/z	Brevicarine	C17H21N3	6.37967	-1.89249	306.136	pos	M+K	5490034	OMGIBPZQATWNBX-UHFFFAOYSA-N	CC1=NC=C(C2=C1NC3=CC=CC=C32)CCCCNC	3.3		Alkaloids and derivatives	Harmala alkaloids		2.26382
5.56_434.1206n	Naringenin 5-O-beta-D-glucopyranoside	C21H22O10	5.55783	-1.50029	435.128	pos	M+H-H2O, M+H	3083618	MFQIWHVVFBCURA-KYSZGLPYSA-N	C1[C@@H](OC2=C(C1=O)C(=CC(=C2)O)O[C@H]3[C@@H]([C@H]([C@@H]([C@H](O3)CO)O)O)O)C4=CC=C(C=C4)O	0		Phenylpropanoids and polyketides	Flavonoids	Flavonoid glycosides	0
6.49_357.1336m/z	Pinoresinol	C20H22O6	6.48685	-2.23956	357.134	neg	M-H	73399	HGXBRUKMWQGOIE-AFHBHXEDSA-N	COC1=C(C=CC(=C1)[C@@H]2[C@H]3CO[C@@H]([C@H]3CO2)C4=CC(=C(C=C4)O)OC)O	2.3	C05366	Lignans, neolignans and related compounds	Furanoid lignans		0
7.99_339.1218m/z	Coniferyl ferulate	C20H20O6	7.99103	-2.56014	339.122	pos	M+H-H2O					C17855				0
6.82_593.1854m/z	Acaciin	C28H32O14	6.81825	-1.88757	593.185	pos	M+H	5317025	YFVGIJBUXMQFOF-PJOVQGMDSA-N	C[C@H]1[C@@H]([C@H]([C@H]([C@@H](O1)OC[C@@H]2[C@H]([C@@H]([C@H]([C@@H](O2)OC3=CC(=C4C(=C3)OC(=CC4=O)C5=CC=C(C=C5)OC)O)O)O)O)O)O)O	-0.5		Phenylpropanoids and polyketides	Flavonoids	Flavonoid glycosides	0
5.10_581.1490m/z	4-(3,4-Dihydroxyphenyl)-7-hydroxy-2-oxo-2H-chromen-5-yl 6-O-D-xylopyranosyl-beta-D-glucopyranoside	C26H28O15	5.09542	-1.84828	581.149	pos	M+H									0
5.65_431.0972m/z	Saponaretin	C21H20O10	5.64888	-2.63019	431.097	neg	M-H					C01714				0
5.35_463.1227m/z	Swertiajaponin	C22H22O11	5.34753	-1.63817	463.123	pos	M+H	442659	DLVLXOYLQKCAME-DGHBBABESA-N	COC1=C(C(=C2C(=C1)OC(=CC2=O)C3=CC(=C(C=C3)O)O)O)[C@H]4[C@@H]([C@H]([C@@H]([C@H](O4)CO)O)O)O	0.2	C10187	Phenylpropanoids and polyketides	Flavonoids	Flavonoid glycosides	0
6.81_283.0604m/z	Glycitein	C16H12O5	6.81237	-2.69205	283.06	neg	M-H	5317750	DXYUAIFZCFRPTH-UHFFFAOYSA-N	COC1=C(C=C2C(=C1)C(=O)C(=CO2)C3=CC=C(C=C3)O)O	2.4	C14536	Phenylpropanoids and polyketides	Isoflavonoids	Isoflav-2-enes	0
6.82_285.0750m/z	Genkwanin	C16H12O5	6.81825	-2.57415	285.075	pos	M+H	5281617	JPMYFOBNRRGFNO-UHFFFAOYSA-N	COC1=CC(=C2C(=C1)OC(=CC2=O)C3=CC=C(C=C3)O)O	2.1	C10046	Phenylpropanoids and polyketides	Flavonoids	O-methylated flavonoids	0

## Sheet: Fig Whole plant
ID	Metabolite	Formula	Retention time(min)	Mass Error (ppm)	m/z	Mode	Adducts	Pubchem_ID	InChiKeys	SMILES	xlogp	KEGG	classA	classB	classC	NXJZZ
6.88_172.0730n	1,4-Cyclohexanedicarboxylic acid	C8H12O4	6.87993	-3.03508	171.066	neg	M-H, 2M-H	14106	PXGZQGDTEZPERC-UHFFFAOYSA-N	C1CC(CCC1C(=O)O)C(=O)O	0.5		Organic acids and derivatives	Carboxylic acids and derivatives	Dicarboxylic acids and derivatives	3.65873e+08
0.79_377.0845m/z	Trehalose	C12H22O11	0.793683	-3.23365	377.085	neg	M+Cl	7427	HDTRYLNUVZCQOY-LIZSDCNHSA-N	C([C@@H]1[C@H]([C@@H]([C@H]([C@H](O1)O[C@@H]2[C@@H]([C@H]([C@@H]([C@H](O2)CO)O)O)O)O)O)O)O	-4.2	C01083	Organic oxygen compounds	Organooxygen compounds	Carbohydrates and carbohydrate conjugates	1.0804e+08
5.34_480.0892n	Gossypin	C21H20O13	5.33662	-2.42722	481.097	pos	M+H, M+Na					C10051				6.79017e+07
0.79_342.1151n	α，β-Trehalose	C12H22O11	0.789917	-3.30083	381.078	pos	M+K, 2M+K, M+Na	10871590	HDTRYLNUVZCQOY-BTLHAWITSA-N	C([C@@H]1[C@H]([C@@H]([C@H]([C@H](O1)O[C@H]2[C@@H]([C@H]([C@@H]([C@H](O2)CO)O)O)O)O)O)O)O	-4.2	C01083	Organic oxygen compounds	Organooxygen compounds	Carbohydrates and carbohydrate conjugates	4.48916e+07
1.43_268.1033m/z	Adenosine	C10H13N5O4	1.43417	-2.91788	268.103	pos	M+H	60961	OIRDTQYFTABQOQ-KQYNXXCUSA-N	C1=NC(=C2C(=N1)N(C=N2)[C@H]3[C@@H]([C@@H]([C@H](O3)CO)O)O)N	-1.1	C00212	Nucleosides, nucleotides, and analogues	Purine nucleosides		4.40661e+07
4.66_354.0942n	Cyclohexanecarboxylic acid	C16H18O9	4.66087	-2.61987	355.101	pos	M+H-H2O, M+H, M+K, M+Na, 2M+Na, M+NH4	7413	NZNMSOFKMUBTKW-UHFFFAOYSA-N	C1CCC(CC1)C(=O)O	1.9	C09822	Organic acids and derivatives	Carboxylic acids and derivatives	Carboxylic acids	4.24422e+07
6.17_516.1256n	3,4-Dicaffeoylquinic acid	C25H24O12	6.16993	-2.32534	515.118	neg	M-2H, M-H	5281780	UFCLZKMFXSILNL-PSEXTPKNSA-N	C1[C@H]([C@H]([C@@H](C[C@@]1(C(=O)O)O)OC(=O)/C=C/C2=CC(=C(C=C2)O)O)OC(=O)/C=C/C3=CC(=C(C=C3)O)O)O	1.5		Organic oxygen compounds	Organooxygen compounds	Alcohols and polyols	3.81729e+07
1.20_118.0262n	Succinic acid	C4H6O4	1.2041	-3.74453	117.019	neg	M-H, M+Cl, M-H2O-H	1110	KDYFGRWQOYBRFD-UHFFFAOYSA-N	C(CC(=O)O)C(=O)O	-0.6	C00042	Organic acids and derivatives	Carboxylic acids and derivatives	Dicarboxylic acids and derivatives	2.9678e+07
0.79_539.1374m/z	Raffinose	C18H32O16	0.793683	-2.14831	539.137	neg	M+Cl	439242	MUPFEKGTMRGPLJ-ZQSKZDJDSA-N	C([C@@H]1[C@@H]([C@@H]([C@H]([C@H](O1)OC[C@@H]2[C@H]([C@@H]([C@H]([C@H](O2)O[C@]3([C@H]([C@@H]([C@H](O3)CO)O)O)CO)O)O)O)O)O)O)O	-5.8	C00492	Organic oxygen compounds	Organooxygen compounds	Carbohydrates and carbohydrate conjugates	2.37271e+07
3.64_203.0820m/z	D-Tryptophan	C11H12N2O2	3.63682	-2.73271	203.082	neg	M-H	9060	QIVBCDIJIAJPQS-SECBINFHSA-N	C1=CC=C2C(=C1)C(=CN2)C[C@H](C(=O)O)N	-1.1	C00525	Organoheterocyclic compounds	Indoles and derivatives	Indolyl carboxylic acids and derivatives	2.30583e+07
6.07_516.1257n	Isochlorogenic acid A	C25H24O12	6.0677	-2.17	515.118	neg	M-2H, M-H	6474310	KRZBCHWVBQOTNZ-RDJMKVHDSA-N	C1C(C[C@H](C([C@@H]1OC(=O)/C=C/C2=CC(=C(C=C2)O)O)O)OC(=O)/C=C/C3=CC(=C(C=C3)O)O)(O)C(=O)O	1.5	C10468	Organic oxygen compounds	Organooxygen compounds	Alcohols and polyols	2.30297e+07
0.83_863.2428m/z	Verbascose	C30H52O26	0.834033	-1.5685	863.243	neg	M+Cl					C08252				2.12693e+07
5.72_465.1018m/z	Spiraeoside	C21H20O12	5.72168	-2.04774	465.102	pos	M+H	5320844	OIUBYZLTFSLSBY-HMGRVEAOSA-N	C1=CC(=C(C=C1C2=C(C(=O)C3=C(C=C(C=C3O2)O)O)O)O)O[C@H]4[C@@H]([C@H]([C@@H]([C@H](O4)CO)O)O)O	0.4		Phenylpropanoids and polyketides	Flavonoids	Flavonoid glycosides	1.97331e+07
8.41_361.0906m/z	5,7,3'-Trihydroxy-6,4',5'-trimethoxyflavone	C18H16O8	8.41495	-3.21578	361.091	pos	M+H	5496475	PMBOOVZSTMWOFS-UHFFFAOYSA-N	COC1=CC(=CC(=C1OC)O)C2=CC(=O)C3=C(O2)C=C(C(=C3O)OC)O	2.6	C04552	Phenylpropanoids and polyketides	Flavonoids	O-methylated flavonoids	1.89409e+07
4.66_162.0313n	4-Methylphthalic anhydride	C9H6O3	4.66087	-2.55444	163.039	pos	M+H-H2O, M+H	88069	ZOXBWJMCXHTKNU-UHFFFAOYSA-N	CC1=CC2=C(C=C1)C(=O)OC2=O	1.7		Organoheterocyclic compounds	Benzofurans	Benzofuranones	1.84806e+07
5.97_495.1122m/z	Laricitrin 3-galactoside	C22H22O13	5.97053	-2.22778	495.112	pos	M+H									1.70276e+07
6.18_508.1207n	Syringetin-3-O-galactoside	C23H24O13	6.18157	-1.86264	509.128	pos	M+H, M+Na	20056941	JMFWYRWPJVEZPV-SFBSONLZSA-N	COC1=CC(=CC(=C1O)OC)C2=C(C(=O)C3=C(C=C(C=C3O2)O)O)OC4[C@@H]([C@H]([C@H]([C@H](O4)CO)O)O)O	0.7		Phenylpropanoids and polyketides	Flavonoids	Flavonoid glycosides	1.6929e+07
5.35_959.1720m/z	Myricetin-3-O-galactoside	C21H20O13	5.35247	-1.56168	959.172	neg	2M-H	5491408	FOHXFLPXBUAOJM-MGMURXEASA-N	C1=C(C=C(C(=C1O)O)O)C2=C(C(=O)C3=C(C=C(C=C3O2)O)O)O[C@H]4[C@@H]([C@H]([C@H]([C@H](O4)CO)O)O)O	0		Phenylpropanoids and polyketides	Flavonoids	Flavonoid glycosides	1.6258e+07
7.35_209.0298m/z	Mucicacid	C6H10O8	7.3489	-2.4988	209.03	neg	M-H	3037582	DSLZVSRJTYRBFB-DUHBMQHGSA-N	[C@@H]([C@@H]([C@H](C(=O)O)O)O)([C@@H](C(=O)O)O)O	-2.5	C00879	Organic oxygen compounds	Organooxygen compounds	Carbohydrates and carbohydrate conjugates	1.60865e+07
3.66_360.1047n	1-O-(3-Hydroxy-4,5-dimethoxybenzoyl)hexopyranose	C15H20O10	3.65662	-2.58236	359.097	neg	M-H, M+Cl									1.56754e+07
6.40_196.1095n	Loliolide	C11H16O3	6.40278	-2.16399	197.117	pos	M+H-H2O, M+H, M+ACN+H, M+H-2H2O	100332	XEVQXKKKAVVSMW-WRWORJQWSA-N	C[C@@]12C[C@H](CC(C1=CC(=O)O2)(C)C)O	1		Organoheterocyclic compounds	Benzofurans		1.48825e+07
1.63_231.0140m/z	Maleic acid	C4H4O4	1.62638	-2.96133	231.014	neg	2M-H	444266	VZCYOOQTPOCHFL-UPHRSURJSA-N	C(=C\C(=O)O)\C(=O)O	-0.3	C01384	Organic acids and derivatives	Carboxylic acids and derivatives	Dicarboxylic acids and derivatives	1.22199e+07
8.06_330.2398n	9S,10S,11R-trihydroxy-12Z-octadecenoic acid	C18H34O5	8.0575	-2.41644	329.233	neg	M-H, 2M-H, M+Cl	16061050	JHGVFGJXFVIYSM-BSHMHQBXSA-N	CCCCC/C=C\[C@H]([C@H]([C@H](CCCCCCCC(=O)O)O)O)O	3.5		Lipids and lipid-like molecules	Fatty Acyls	Fatty acids and conjugates	1.19378e+07
8.80_161.0240m/z	3 Hydroxycoumarin	C9H6O3	8.80318	-2.37124	161.024	neg	M-H	13650	MJKVTPMWOKAVMS-UHFFFAOYSA-N	C1=CC=C2C(=C1)C=C(C(=O)O2)O	1.8		Phenylpropanoids and polyketides	Coumarins and derivatives	Hydroxycoumarins	1.05291e+07
3.04_153.1271m/z	(R)-Camphor	C10H16O	3.04152	-2.09831	153.127	pos	M+H	159055	DSSYKIVIOFKYAU-XCBNKYQSSA-N	C[C@@]12CC[C@@H](C1(C)C)CC2=O	2.2	C00808	Lipids and lipid-like molecules	Prenol lipids	Monoterpenoids	1.02211e+07
1.03_243.0629m/z	Uridine	C9H12N2O6	1.02993	2.73513	243.063	neg	M-H	6029	DRTQHJPVMGBUCF-XVFCMESISA-N	C1=CN(C(=O)NC1=O)[C@H]2[C@@H]([C@@H]([C@H](O2)CO)O)O	-2	C00299	Nucleosides, nucleotides, and analogues	Pyrimidine nucleosides		1.01093e+07
1.90_165.0785n	D-phenylalanine	C9H11NO2	1.90188	-2.71996	164.071	neg	M-H, 2M-H	71567	COLNVLDHVKWLRT-MRVPVSSYSA-N	C1=CC=C(C=C1)C[C@H](C(=O)O)N	-1.5	C02265	Organic acids and derivatives	Carboxylic acids and derivatives	Amino acids, peptides, and analogues	9.85736e+06
0.88_226.9958m/z	D-threo-Isocitric acid	C6H8O7	0.880417	-3.11901	226.996	neg	M+Cl	5318532	ODBLHEXUDAPZAU-ZAFYKAAXSA-N	C([C@@H]([C@H](C(=O)O)O)C(=O)O)C(=O)O	-1.8	C00451	Organic acids and derivatives	Carboxylic acids and derivatives	Tricarboxylic acids and derivatives	8.68998e+06
6.15_505.0979m/z	Quercetin 3-O-beta-glucopyranosyl-6'-acetate	C23H22O13	6.1479	-1.76349	505.098	neg	M-H									8.6074e+06
10.79_519.3315n	PC(18:2/0:0)	C26H50NO7P	10.7931	-1.86819	520.339	pos	M+H, M+K, M+Na	497299	IHNKQIMGVNPMTC-RUZDIDTESA-N	CCCCCCCCCCCCCCCCCC(=O)OC[C@H](COP(=O)([O-])OCC[N+](C)(C)C)O	6.6		Lipids and lipid-like molecules	Glycerophospholipids	Glycerophosphocholines	7.8533e+06
7.04_428.1669n	1-[3-[(4-fluorophenyl)methyl]-4-oxothieno[3,2-d]pyrimidin-2-yl]-N-propylpiperidine-4-carboxamide	C22H25FN4O2S	7.04355	-3.04023	429.174	pos	M+Na, 2M+H, M+K, M+NH4, M+H, M+H-H2O, M+H-2H2O									7.20778e+06
10.19_517.3158n	PC(18:3/0:0)	C26H48NO7P	10.1864	-1.99308	518.323	pos	M+H, M+Na	24779469	WKQNRCYKYCKESD-YVHLTTHBSA-N	CC/C=C\C/C=C\C/C=C\CCCCCCCC(=O)OC[C@H](COP(=O)([O-])OCC[N+](C)(C)C)O	4.3		Lipids and lipid-like molecules	Glycerophospholipids	Glycerophosphocholines	6.58911e+06
8.85_180.1146n	Dihydroactinidiolide	C11H16O2	8.84733	-2.51107	181.122	pos	M+H, M+ACN+H, M+H-H2O, M+H-2H2O	27209	IMKHDCBNRDRUEB-UHFFFAOYSA-N	CC1(CCCC2(C1=CC(=O)O2)C)C	2.2		Organoheterocyclic compounds	Benzofurans		5.66949e+06
6.15_479.0813m/z	Quercetin 3-O-glucuronide	C21H18O13	6.1472	-1.49902	479.081	pos	M+H	5274585	DUBCCGAQYVUYEU-ZUGPOPFOSA-N	C1=CC(=C(C=C1C2=C(C(=O)C3=C(C=C(C=C3O2)O)O)O[C@H]4[C@@H]([C@H]([C@@H]([C@H](O4)C(=O)O)O)O)O)O)O	0.6		Phenylpropanoids and polyketides	Flavonoids	Flavonoid glycosides	5.08425e+06
2.30_146.1172m/z	N-Methylisoleucine	C7H15NO2	2.29983	-2.36422	146.117	pos	M+H	560437	KSPIYJQBLVDRRI-UHFFFAOYSA-N	CCC(C)C(C(=O)O)NC	-1.8		Organic acids and derivatives	Carboxylic acids and derivatives	Amino acids, peptides, and analogues	4.70402e+06
1.23_191.0193m/z	Citrate	C6H8O7	1.2276	-2.38215	191.019	neg	M-H	31348	KRKNYBCHXYNGOX-UHFFFAOYSA-K	C(C(=O)[O-])C(CC(=O)[O-])(C(=O)[O-])O	0.2	C00158	Organic acids and derivatives	Carboxylic acids and derivatives	Tricarboxylic acids and derivatives	4.53815e+06
11.40_834.5282m/z	GPSer(22:6/18:0)	C46H78NO10P	11.4002	-0.967084	834.528	neg	M-H									3.8708e+06
6.16_551.1021m/z	Quercetin 3-O-malonylglucoside	C24H22O15	6.15927	-1.81801	551.102	pos	M+H	5282159	NBQPHANHNTWDML-UJKBSQBPSA-N	C1=CC(=C(C=C1C2=C(C(=O)C3=C(C=C(C=C3O2)O)O)O[C@H]4[C@@H]([C@H]([C@@H]([C@H](O4)COC(=O)CC(=O)O)O)O)O)O)O	0.1	C12638	Phenylpropanoids and polyketides	Flavonoids	Flavonoid glycosides	3.74275e+06
6.60_493.1331m/z	6-Hydroxyluteolin 6,3'-dimethyl ether 7-glucoside	C23H24O12	6.60338	-1.84436	493.133	pos	M+H	44258501	YFZSQPRYLBGYKE-SLYRBRRESA-N	COC1=C(C=CC(=C1)C2=CC(=O)C3=C(C(=C(C=C3O2)O[C@H]4C([C@H]([C@@H](C(O4)CO)O)O)O)OC)O)O	0.8		Phenylpropanoids and polyketides	Flavonoids	Flavonoid glycosides	3.64115e+06
5.72_927.1822m/z	Quercetin-3-O-glucoside	C21H20O12	5.7212	-1.56426	927.182	neg	2M-H	22630387	RPVIQWDFJPYNJM-UHFFFAOYSA-N	C1=CC(=C(C=C1C2=C(C(=O)C3=C(C=C(C=C3O2)O)O)OC4C(C(C(C(O4)CO)O)O)O)O)OC5C(C(C(C(O5)CO)O)O)O	-1.4	C05623	Phenylpropanoids and polyketides	Flavonoids	Flavonoid glycosides	3.62225e+06
5.76_303.0492m/z	quercetin	C15H10O7	5.75683	-2.36778	303.049	pos	M+H	5280343	REFJWTPEDVJJIY-UHFFFAOYSA-N	C1=CC(=C(C=C1C2=C(C(=O)C3=C(C=C(C=C3O2)O)O)O)O)O	1.5	C00389	Phenylpropanoids and polyketides	Flavonoids	Flavones	3.36681e+06
10.20_351.2521m/z	(E)-5-(1,2,4a,5-tetramethyl-7-oxo-3,4,8,8a-tetrahydro-2H-naphthalen-1-yl)-3-methylpent-2-enoic acid	C20H30O3	10.1988	-2.80631	351.252	pos	M+CH3OH+H	13918478	SLMFLTPPPXRYHP-JLHYYAGUSA-N	CC1CCC2(C(C1(C)CC/C(=C/C(=O)O)/C)CC(=O)C=C2C)C	4.8		Lipids and lipid-like molecules	Prenol lipids	Diterpenoids	3.34292e+06
1.03_86.0968m/z	Piperidine	C5H11N	1.03448	4.31138	86.0968	pos	M+H	8082	NQRYJNQNLNOLGT-UHFFFAOYSA-N	C1CCNCC1	0.8	C01746	Organoheterocyclic compounds	Piperidines		3.15115e+06
5.23_626.1471n	Quercetin-3,4'-O-di-beta-glucoside	C27H30O17	5.22565	-1.89696	627.154	pos	M+H, M+Na	22630387	RPVIQWDFJPYNJM-UHFFFAOYSA-N	C1=CC(=C(C=C1C2=C(C(=O)C3=C(C=C(C=C3O2)O)O)OC4C(C(C(C(O4)CO)O)O)O)O)OC5C(C(C(C(O5)CO)O)O)O	-1.4	C05623	Phenylpropanoids and polyketides	Flavonoids	Flavonoid glycosides	3.1011e+06
11.24_495.3314n	PC(16:0/0:0)	C24H50NO7P	11.2351	-2.13144	496.339	pos	M+H, M+Na	460602	ASWBNKHCZGQVJV-HSZRJFAPSA-N	CCCCCCCCCCCCCCCC(=O)OC[C@H](COP(=O)([O-])OCC[N+](C)(C)C)O	5.6		Lipids and lipid-like molecules	Glycerophospholipids	Glycerophosphocholines	3.08104e+06
3.66_153.0189m/z	Protocatechuic acid	C7H6O4	3.65662	-2.68206	153.019	neg	M-H	72	YQUVCSBJEUQKSH-UHFFFAOYSA-N	C1=CC(=C(C=C1C(=O)O)O)O	1.1	C00230	Benzenoids	Benzene and substituted derivatives	Benzoic acids and derivatives	3.02463e+06
6.23_479.1174m/z	Isorhamnetin-3-galactoside	C22H22O12	6.22755	-2.08289	479.117	pos	M+H	13245586	CQLRUIIRRZYHHS-UHFFFAOYSA-N	COC1=C(C=CC(=C1)C2=C(C(=O)C3=C(C=C(C=C3O2)O)O)OC4C(C(C(C(O4)CO)O)O)O)O	0.7		Phenylpropanoids and polyketides	Flavonoids	Flavonoid glycosides	2.84809e+06
0.81_133.0739n	N-Methylthreonine	C5H11NO3	0.8108	0.285119	116.071	pos	M+H-H2O, M+H	7010355	CCAIIPMIAFGKSI-DMTCNVIQSA-N	C[C@H]([C@@H](C(=O)O)NC)O	-3.1		Organic acids and derivatives	Carboxylic acids and derivatives	Amino acids, peptides, and analogues	2.6702e+06
5.47_610.1523n	Kaempferol 3-O-gentiobioside	C27H30O16	5.46925	-1.75775	611.16	pos	M+H, M+Na	9960512	BITPRCODIALMOV-DEFKTLOSSA-N	C1=CC(=CC=C1C2=C(C(=O)C3=C(C=C(C=C3O2)O)O)O[C@H]4[C@@H]([C@H]([C@@H]([C@H](O4)CO[C@H]5[C@@H]([C@H]([C@@H]([C@H](O5)CO)O)O)O)O)O)O)O	-1.4		Phenylpropanoids and polyketides	Flavonoids	Flavonoid glycosides	2.61233e+06
0.91_133.0139m/z	malate	C4H6O5	0.91045	-2.75594	133.014	neg	M-H	525	BJEPYKJPYRNKOW-UHFFFAOYSA-N	C(C(C(=O)O)O)C(=O)O	-1.3	C00711	Organic acids and derivatives	Hydroxy acids and derivatives	Beta hydroxy acids and derivatives	2.59353e+06
5.57_611.1598m/z	RUTIN	C27H30O16	5.56797	-1.3909	611.16	pos	M+H	5280805	IKGXIBQEEMLURG-NVPNHPEKSA-N	C[C@H]1[C@@H]([C@H]([C@H]([C@@H](O1)OC[C@@H]2[C@H]([C@@H]([C@H]([C@@H](O2)OC3=C(OC4=CC(=CC(=C4C3=O)O)O)C5=CC(=C(C=C5)O)O)O)O)O)O)O)O	-1.3	C05625	Phenylpropanoids and polyketides	Flavonoids	Flavonoid glycosides	2.54838e+06
5.91_206.0817m/z	N-acetylphenylalanine	C11H13NO3	5.90983	-2.57456	206.082	neg	M-H	74839	CBQJSKKFNMDLON-JTQLQIEISA-N	CC(=O)N[C@@H](CC1=CC=CC=C1)C(=O)O	0.6		Organic acids and derivatives	Carboxylic acids and derivatives	Amino acids, peptides, and analogues	2.01266e+06
5.47_287.0543m/z	kaempferol	C15H10O6	5.46925	-2.38164	287.054	pos	M+H	5280863	IYRMWMYZSQPJKC-UHFFFAOYSA-N	C1=CC(=CC=C1C2=C(C(=O)C3=C(C=C(C=C3O2)O)O)O)O	1.9	C05903	Phenylpropanoids and polyketides	Flavonoids	Flavones	2.00428e+06
5.47_172.0975m/z	N-Acetyl-leucine	C8H15NO3	5.46552	-2.29244	172.098	neg	M-H	70912	WXNXCEHXYPACJF-ZETCQYMHSA-N	CC(C)C[C@@H](C(=O)O)NC(=O)C	0.5	C02710	Organic acids and derivatives	Carboxylic acids and derivatives	Amino acids, peptides, and analogues	1.9913e+06
6.48_187.0971m/z	Azelaic acid	C9H16O4	6.4755	-2.75232	187.097	neg	M-H	2266	BDJRBEYXGGNYIS-UHFFFAOYSA-N	C(CCCC(=O)O)CCCC(=O)O	1.6	C08261	Lipids and lipid-like molecules	Fatty Acyls	Fatty acids and conjugates	1.97081e+06
0.86_213.0167m/z	D-(-)-Gulono-gamma-lactone	C6H10O6	0.861783	-2.58163	213.017	neg	M+Cl									1.90054e+06
5.40_165.0189m/z	Phthalic acid	C8H6O4	5.40348	-2.80619	165.019	neg	M-H	1017	XNGIFLGASWRNHJ-UHFFFAOYSA-N	C1=CC=C(C(=C1)C(=O)O)C(=O)O	0.7	C01606	Benzenoids	Benzene and substituted derivatives	Benzoic acids and derivatives	1.77546e+06
6.21_477.1024m/z	Isorhamnetin-3-O-glucoside	C22H22O12	6.21292	-3.07228	477.102	neg	M-H	5318645	CQLRUIIRRZYHHS-LFXZADKFSA-N	COC1=C(C=CC(=C1)C2=C(C(=O)C3=C(C=C(C=C3O2)O)O)O[C@H]4[C@@H]([C@H]([C@@H]([C@H](O4)CO)O)O)O)O	0.7	C22589	Phenylpropanoids and polyketides	Flavonoids	Flavonoid glycosides	1.54845e+06
7.06_163.0761m/z	Isoeugenol	C10H12O2	7.05685	-2.27488	163.076	neg	M-H	853433	BJIOGJUNALELMI-ONEGZZNKSA-N	C/C=C/C1=CC(=C(C=C1)O)OC	2.6	C10469	Benzenoids	Phenols	Methoxyphenols	1.53701e+06
6.07_516.1258n	3,5-Di-O-caffeoylquinic acid	C25H24O12	6.06892	-1.89012	517.133	pos	M+H, M+Na	6474310	KRZBCHWVBQOTNZ-RDJMKVHDSA-N	C1C(C[C@H](C([C@@H]1OC(=O)/C=C/C2=CC(=C(C=C2)O)O)O)OC(=O)/C=C/C3=CC(=C(C=C3)O)O)(O)C(=O)O	1.5		Organic oxygen compounds	Organooxygen compounds	Alcohols and polyols	1.29837e+06
5.09_177.0189m/z	Esculetin	C9H6O4	5.08508	-2.41614	177.019	neg	M-H	5281416	ILEDWLMCKZNDJK-UHFFFAOYSA-N	C1=CC(=O)OC2=CC(=C(C=C21)O)O	1.2	C09263	Phenylpropanoids and polyketides	Coumarins and derivatives	Hydroxycoumarins	1.21407e+06
0.81_103.0637n	gamma-Aminobutyric acid	C4H9NO2	0.8108	3.84825	104.071	pos	M+H-H2O, M+H	119	BTCSSZJGUNDROE-UHFFFAOYSA-N	C(CC(=O)O)CN	-3.2	C00334	Organic acids and derivatives	Carboxylic acids and derivatives	Amino acids, peptides, and analogues	1.19757e+06
1.34_152.0564m/z	Guanine	C5H5N5O	1.34035	-1.80985	152.056	pos	M+H	135398634	UYTPUPDQBNUYGX-UHFFFAOYSA-N	C1=NC2=C(N1)C(=O)NC(=N2)N	-1.1	C00242	Organoheterocyclic compounds	Imidazopyrimidines	Purines and purine derivatives	1.19348e+06
3.63_118.0651m/z	2-Aminoacetophenone	C8H9NO	3.6343	0.0660587	118.065	pos	M+H-H2O	11952	HEQOJEGTZCTHCF-UHFFFAOYSA-N	C1=CC=C(C=C1)C(=O)CN	0.8		Organic oxygen compounds	Organooxygen compounds	Carbonyl compounds	1.19181e+06
7.02_297.0760m/z	5-O-Methylbiochanin A	C17H14O5	7.01782	-2.69387	297.076	neg	M-H	14308334	JQQULYXWXRNRAX-UHFFFAOYSA-N	COC1=CC=C(C=C1)C2=COC3=C(C2=O)C(=CC(=C3)O)OC	2.8		Phenylpropanoids and polyketides	Isoflavonoids	O-methylated isoflavonoids	1.15488e+06
8.16_467.2265m/z	Glu Arg Tyr	C20H30N6O7	8.15537	3.58334	467.227	pos	M+H	10181671	WVRUKYLYMFGKAN-IHRRRGAJSA-N	C1=CC(=CC=C1C[C@@H](C(=O)N[C@@H](CCC(=O)O)C(=O)N[C@@H](CCC(=O)O)C(=O)O)N)O	-4.8		Organic acids and derivatives	Carboxylic acids and derivatives	Amino acids, peptides, and analogues	1.10614e+06
1.65_281.1489m/z	Val Tyr	C14H20N2O4	1.65085	-2.28433	281.149	pos	M+H	7009555	VEYJKJORLPYVLO-RYUDHWBXSA-N	CC(C)[C@@H](C(=O)N[C@@H](CC1=CC=C(C=C1)O)C(=O)O)N	-2.5		Organic acids and derivatives	Carboxylic acids and derivatives	Amino acids, peptides, and analogues	1.10192e+06
7.81_466.2194n	4-(4-benzyl-2,3-dioxopiperazin-1-yl)-N-(2,5-dimethoxyphenyl)piperidine-1-carboxamide	C25H30N4O5	7.80528	-4.81793	467.227	pos	M+H-2H2O, M+H-H2O, M+H									1.09166e+06
1.57_283.0676m/z	xanthosine	C10H12N4O6	1.57432	-2.90081	283.068	neg	M-H	64959	UBORTCNDUKBEOP-UUOKFMHZSA-N	C1=NC2=C(N1[C@H]3[C@@H]([C@@H]([C@H](O3)CO)O)O)NC(=O)NC2=O	-2.4	C01762	Nucleosides, nucleotides, and analogues	Purine nucleosides		1.08067e+06
4.76_403.1598m/z	Diethyloxalpropionate	C9H14O5	4.76215	-2.79586	403.16	neg	2M-H	97750	OQOCQBJWOCRPQY-UHFFFAOYSA-N	CCOC(=O)C(C)C(=O)C(=O)OCC	1.3	C04067	Organic acids and derivatives	Keto acids and derivatives	Beta-keto acids and derivatives	1.05683e+06
10.87_310.2136n	13S-Hydroperoxy-9Z,11E,15Z-octadecatrienoic acid	C18H30O4	10.8661	-2.47823	293.21	pos	M+H-H2O, M+H, M+ACN+H	5497123	UYQGVDXDXBAABN-FQSPHKRJSA-N	CC/C=C\C[C@@H](/C=C/C=C\CCCCCCCC(=O)O)OO	4.8		Lipids and lipid-like molecules	Fatty Acyls	Lineolic acids and derivatives	1.05319e+06
2.52_218.1027m/z	Pantothenic acid	C9H17NO5	2.52208	-2.97234	218.103	neg	M-H	6613	GHOKWGTUZJEAQD-ZETCQYMHSA-N	CC(C)(CO)[C@H](C(=O)NCCC(=O)O)O	-1.1	C00864	Organic oxygen compounds	Organooxygen compounds	Alcohols and polyols	967857
6.17_449.1068m/z	Cynaroside	C21H20O11	6.16943	-2.30575	449.107	pos	M+H	5280637	PEFNSGRTCBGNAN-QNDFHXLGSA-N	C1=CC(=C(C=C1C2=CC(=O)C3=C(C=C(C=C3O2)O[C@H]4[C@@H]([C@H]([C@@H]([C@H](O4)CO)O)O)O)O)O)O	0.5	C03951	Phenylpropanoids and polyketides	Flavonoids	Flavonoid glycosides	931841
4.62_160.0521n	2,6-Dihydroxynaphthalene	C10H8O2	4.6153	-2.1384	193.086	pos	M+H, 2M+ACN+H, M+CH3OH+H	93552	MNZMMCVIXORAQL-UHFFFAOYSA-N	C1=CC2=C(C=CC(=C2)O)C=C1O	2.3	C16213	Benzenoids	Naphthalenes	Naphthols and derivatives	925483
6.13_299.0189m/z	Irigenol	C15H10O8	6.12753	-2.71522	299.019	neg	M-H2O-H									904435
8.58_235.1687m/z	Curcumenol	C15H22O2	8.5798	-2.27386	235.169	pos	M+H	167812	ISFMXVMWEWLJGJ-NZBPQXDJSA-N	C[C@H]1CC[C@@H]2[C@]13CC(=C(C)C)[C@](O3)(C=C2C)O	2.2	C16942	Lipids and lipid-like molecules	Prenol lipids	Sesquiterpenoids	891443
9.77_312.2293n	9-Hydroxy-10,12-octadecadienoic acid	C18H32O4	9.76813	-2.333	311.222	neg	M-H2O-H, M-H	5282945	NPDSHTNEKLQQIJ-SIGMCMEVSA-N	CCCCC/C=C/C=C/C(CCCCCCCC(=O)O)O	5.3	C21923	Lipids and lipid-like molecules	Fatty Acyls	Lineolic acids and derivatives	867232
5.05_377.1447m/z	Flavin mononucleotide	C17H20N4O6	5.05055	-2.40482	377.145	pos	M+H	643976	FVTCRASFADXXNN-SCRDCRAPSA-N	CC1=CC2=C(C=C1C)N(C3=NC(=O)NC(=O)C3=N2)C[C@@H]([C@@H]([C@@H](COP(=O)(O)O)O)O)O	-2.6	C00061	Nucleosides, nucleotides, and analogues	Flavin nucleotides		858758
7.09_359.0763m/z	Centaureidin	C18H16O8	7.08875	-2.50687	359.076	neg	M-H	5315773	BZXULYMZYPRZOG-UHFFFAOYSA-N	COC1=C(C=C(C=C1)C2=C(C(=O)C3=C(O2)C=C(C(=C3O)OC)O)OC)O	2.8		Phenylpropanoids and polyketides	Flavonoids	O-methylated flavonoids	831439
2.58_282.1191m/z	2'-O-Methyladenosine	C11H15N5O4	2.58262	-2.20729	282.119	pos	M+H	102213	FPUGCISOLXNPPC-IOSLPCCCSA-N	CO[C@@H]1[C@@H]([C@H](O[C@H]1N2C=NC3=C(N=CN=C32)N)CO)O	-0.5		Nucleosides, nucleotides, and analogues	Purine nucleosides		812387
4.21_179.0346m/z	caffeic acid	C9H8O4	4.20835	-2.33571	179.035	neg	M-H	689043	QAIPRVGONGVQAS-DUXPYHPUSA-N	C1=CC(=C(C=C1/C=C/C(=O)O)O)O	1.2	C01481	Phenylpropanoids and polyketides	Cinnamic acids and derivatives	Hydroxycinnamic acids and derivatives	804797
1.03_284.0983m/z	Guanosine	C10H13N5O5	1.03448	-2.41588	284.098	pos	M+H	135398635	NYHBQMYGNKIUIF-UUOKFMHZSA-N	C1=NC2=C(N1[C@H]3[C@@H]([C@@H]([C@H](O3)CO)O)O)N=C(NC2=O)N	-1.9	C00387	Nucleosides, nucleotides, and analogues	Purine nucleosides		804290
6.11_163.0396m/z	Phenylpyruvic acid	C9H8O3	6.10918	-2.62419	163.04	neg	M-H	997	BTNMPGBKDVTSJY-UHFFFAOYSA-N	C1=CC=C(C=C1)CC(=O)C(=O)O	1.3	C00166	Benzenoids	Benzene and substituted derivatives	Phenylpyruvic acid derivatives	738813
5.10_581.1490m/z	4-(3,4-Dihydroxyphenyl)-7-hydroxy-2-oxo-2H-chromen-5-yl 6-O-D-xylopyranosyl-beta-D-glucopyranoside	C26H28O15	5.09542	-1.84828	581.149	pos	M+H									717173
7.27_303.0491m/z	Tricetin	C15H10O7	7.27465	-2.59982	303.049	pos	M+H	5281701	ARSRJFRKVXALTF-UHFFFAOYSA-N	C1=C(C=C(C(=C1O)O)O)C2=CC(=O)C3=C(C=C(C=C3O2)O)O	1	C10192	Phenylpropanoids and polyketides	Flavonoids	Flavones	623447
7.92_230.2474m/z	N,N-Dimethyldodecylamine N-oxide	C14H31NO	7.92032	-2.07058	230.247	pos	M+H	15433	SYELZBGXAIXKHU-UHFFFAOYSA-N	CCCCCCCCCCCC[N+](C)(C)[O-]	5.3		Organic nitrogen compounds	Organonitrogen compounds	Aminoxides	622472
6.43_133.1010m/z	Cumic alcohol	C10H14O	6.42505	-1.33619	133.101	pos	M+H-H2O	325	OIGWAXDAPKFNCQ-UHFFFAOYSA-N	CC(C)C1=CC=C(C=C1)CO	2.3	C06576	Lipids and lipid-like molecules	Prenol lipids	Monoterpenoids	619803
6.74_238.1928n	4(15)-Selinene-11,12-diol	C15H26O2	6.74138	-2.00886	221.19	pos	M+H-H2O, M+H									619200
5.47_449.1073m/z	Luteolin 4'-glucoside	C21H20O11	5.46925	-1.19107	449.107	pos	M+H	12304737	UHNXUSWGOJMEFO-UHFFFAOYSA-N	C1=CC(=C(C=C1C2=CC(=O)C3=C(C=C(C=C3O2)O)O)O)OC4C(C(C(C(O4)CO)O)O)O	0.5		Phenylpropanoids and polyketides	Flavonoids	Flavonoid glycosides	612683
3.67_197.0450m/z	Syringic acid	C9H10O5	3.66838	-2.68812	197.045	neg	M-H	10742	JMSVCTWVEWCHDZ-UHFFFAOYSA-N	COC1=CC(=CC(=C1O)OC)C(=O)O	1	C10833	Benzenoids	Benzene and substituted derivatives	Benzoic acids and derivatives	594468
2.27_156.0662m/z	N-Acetyl-proline	C7H11NO3	2.26707	-2.45606	156.066	neg	M-H	322640	GNMSLDIYJOSUSW-UHFFFAOYSA-N	CC(=O)N1CCCC1C(=O)O	-0.7		Organic acids and derivatives	Carboxylic acids and derivatives	Amino acids, peptides, and analogues	594399
5.85_151.0397m/z	Vanillin	C8H8O3	5.85038	-2.53617	151.04	neg	M-H	1183	MWOOGOJBHIARFG-UHFFFAOYSA-N	COC1=C(C=CC(=C1)C=O)O	1.2	C00755	Benzenoids	Phenols	Methoxyphenols	575642
1.03_181.0735n	L-Tyrosine	C9H11NO3	1.02993	-2.38027	180.066	neg	M-H, M+Cl	6057	OUYCCCASQSFEME-QMMMGPOBSA-N	C1=CC(=CC=C1C[C@@H](C(=O)O)N)O	-2.3	C00082	Organic acids and derivatives	Carboxylic acids and derivatives	Amino acids, peptides, and analogues	572694
11.69_294.2187n	9-Oxo-10E,12Z-octadecadienoic acid	C18H30O3	11.6911	-2.54018	295.226	pos	M+H, M+Na	9839084	LUZSWWYKKLTDHU-ZJHFMPGASA-N	CCCCC/C=C\C=C\C(=O)CCCCCCCC(=O)O	5.2		Lipids and lipid-like molecules	Fatty Acyls	Lineolic acids and derivatives	567947
4.98_251.1385m/z	Feruloyl allylamine	C13H15NO3	4.9849	-2.11476	251.139	pos	M+NH4	139291976	NAYMCRXFMBIDTH-FNORWQNLSA-N	COC1=C(C=CC(=C1)/C=C/C(=O)NCC=C)O	1.9					550801
10.75_476.2772m/z	PE(18:2/0:0)	C23H44NO7P	10.7501	-2.16845	476.277	neg	M-H	9547068	BBYWOYAFBUOUFP-JOCHJYFZSA-N	CCCCCCCCCCCCCCCCCC(=O)OC[C@H](COP(=O)(O)OCCN)O	3.4		Lipids and lipid-like molecules	Glycerophospholipids	Glycerophosphoethanolamines	537741
6.33_291.0968m/z	Malonyltryptophan	C14H14N2O5	6.32682	-2.50433	291.097	pos	M+H	5199636	OVEAWSPZRGBTSS-UHFFFAOYSA-N	C1=CC=C2C(=C1)C(=CN2)CC(C(=O)O)NC(=O)CC(=O)O	0.3		Organic acids and derivatives	Carboxylic acids and derivatives	Amino acids, peptides, and analogues	537171
1.19_129.0425n	L-Pyroglutamic acid	C5H7NO3	1.19307	-0.717222	130.05	pos	M+H, M+ACN+H	7405	ODHCTXKNWHHXJC-VKHMYHEASA-N	C1CC(=O)N[C@@H]1C(=O)O	-0.8	C01879	Organic acids and derivatives	Carboxylic acids and derivatives	Amino acids, peptides, and analogues	527710
3.63_174.0790n	Indole-3-acetamide	C10H10N2O	3.6343	-1.91949	175.086	pos	M+H-H2O, M+H	397	ZOAMBXDOGPRZLP-UHFFFAOYSA-N	C1=CC=C2C(=C1)C(=CN2)CC(=O)N	0.8	C02693	Organoheterocyclic compounds	Indoles and derivatives	Indoles	502670
0.82_243.0850n	Cytidine	C9H13N3O5	0.821567	-1.985	244.092	pos	M+H, 2M+Na, 2M+H	6175	UHDGCWIWMRVCDJ-XVFCMESISA-N	C1=CN(C(=O)N=C1N)[C@H]2[C@@H]([C@@H]([C@H](O2)CO)O)O	-2.1	C00475	Nucleosides, nucleotides, and analogues	Pyrimidine nucleosides		499985
6.69_137.0240m/z	p-Hydroxybenzoic acid	C7H6O3	6.6949	-2.71861	137.024	neg	M-H	135	FJKROLUGYXJWQN-UHFFFAOYSA-N	C1=CC(=CC=C1C(=O)O)O	1.6	C00156	Benzenoids	Benzene and substituted derivatives	Benzoic acids and derivatives	484925
3.94_197.0450m/z	2-Hydroxy-3,4-Dimethoxybenzoic Acid	C9H10O5	3.93693	-2.6734	197.045	neg	M-H	79737	CJFQIVAOBBTJCI-UHFFFAOYSA-N	COC1=C(C(=C(C=C1)C(=O)O)O)OC	1.9		Benzenoids	Benzene and substituted derivatives	Benzoic acids and derivatives	479593
5.65_503.1901m/z	Olivil 4'-O-Glucoside	C26H34O12	5.64507	-2.08259	503.19	pos	M+H-2H2O	14033815	SXGSYHDLSPXCMU-CTQTXEDXSA-N	COC1=C(C=CC(=C1)C[C@]2(CO[C@@H]([C@H]2CO)C3=CC(=C(C=C3)O)OC)O)O[C@H]4[C@@H]([C@H]([C@@H]([C@H](O4)CO)O)O)O	0.1		Lignans, neolignans and related compounds	Lignan glycosides		476680
6.53_160.1096n	(R)-2-Hydroxycaprylic acid	C8H16O3	6.53118	-1.97647	141.092	neg	M-H2O-H, M-H	5312860	JKRDADVRIYVCCY-SSDOTTSWSA-N	CCCCCC[C@H](C(=O)O)O	2		Lipids and lipid-like molecules	Fatty Acyls	Fatty acids and conjugates	460868
5.10_167.0345m/z	Vanillic acid	C8H8O4	5.0956	-2.59883	167.035	neg	M-H	8468	WKOLLVMJNQIZCI-UHFFFAOYSA-N	COC1=C(C=CC(=C1)C(=O)O)O	1.4	C06672	Benzenoids	Benzene and substituted derivatives	Benzoic acids and derivatives	459867
8.92_160.0521n	4-Methylcoumarin	C10H8O2	8.91708	-2.06434	193.086	pos	M+H, M+CH3OH+H	11833	PSGQCCSGKGJLRL-UHFFFAOYSA-N	CC1=CC(=O)OC2=CC=CC=C12	2.3		Phenylpropanoids and polyketides	Coumarins and derivatives		445089
7.60_233.1531m/z	Costunolide	C15H20O2	7.6033	-2.29773	233.153	pos	M+H	5281437	HRYLQFBHBWLLLL-AHNJNIBGSA-N	C/C/1=C\CC/C(=C/[C@@H]2[C@@H](CC1)C(=C)C(=O)O2)/C	2.1	C09382	Lipids and lipid-like molecules	Prenol lipids	Terpene lactones	434302
3.46_346.1254n	4-Hydroxy-3,5-dimethoxybenzyl -D-glucopyranoside	C15H22O9	3.4634	-2.80323	369.115	pos	M+Na, 2M+Na, M+NH4									416278
6.30_461.0717m/z	Kaempferol 3-glucuronoside	C21H18O12	6.30258	-1.88778	461.072	neg	M-H	22846027	FNTJVYCFNVUBOL-MBIBTLSJSA-N	C1=CC(=CC=C1C2=C(C(=O)C3=C(C=C(C=C3O2)O)O)OC4[C@@H]([C@H]([C@@H]([C@H](O4)C(=O)O)O)O)O)O	1		Phenylpropanoids and polyketides	Flavonoids	Flavonoid glycosides	391694
1.53_252.1086m/z	Cordycepin	C10H13N5O3	1.53248	-1.95947	252.109	pos	M+H	6303	OFEZSBMBBKLLBJ-BAJZRUMYSA-N	C1[C@H](O[C@H]([C@@H]1O)N2C=NC3=C(N=CN=C32)N)CO	-1.2	C08431	Nucleosides, nucleotides, and analogues	Purine nucleosides	Purine 3'-deoxyribonucleosides	388174
5.69_507.1123m/z	Quercetin 3-(6-O-acetyl-beta-glucoside)	C23H22O13	5.68698	-2.0337	507.112	pos	M+H	10006384	IGLUNMMNDNWZOA-LNNZMUSMSA-N	CC(=O)OC[C@@H]1[C@H]([C@@H]([C@H]([C@@H](O1)OC2=C(OC3=CC(=CC(=C3C2=O)O)O)C4=CC(=C(C=C4)O)O)O)O)O	0.4		Phenylpropanoids and polyketides	Flavonoids	Flavonoid glycosides	380504
5.01_491.1175m/z	Cyanidin 3-(6''-acetylglucoside)	C23H22O12	5.00887	-1.78009	491.118	pos	M+H									376779
5.61_207.0657m/z	Sinapaldehyde	C11H12O4	5.60717	-2.61742	207.066	neg	M-H	5280802	CDICDSOGTRCHMG-ONEGZZNKSA-N	COC1=CC(=CC(=C1O)OC)/C=C/C=O	1.4	C05610	Benzenoids	Phenols	Methoxyphenols	374329
6.60_313.0710m/z	Dipteryxin	C17H14O6	6.6025	-2.44908	313.071	neg	M-H	44257265	BSXFDHHTXOAUGB-UHFFFAOYSA-N	COC1=CC=C(C=C1)C2=COC3=C(C(=C(C=C3C2=O)OC)O)O	2.4		Phenylpropanoids and polyketides	Isoflavonoids	O-methylated isoflavonoids	368710
5.23_281.1386m/z	Lactarorufin B	C15H22O5	5.22843	-3.03743	281.139	neg	M-H	182703	DBKIEMOKQWYZOA-UHFFFAOYSA-N	CC1(CC2C(C1)C(CC3=C(C2O)COC3=O)(C)O)CO	-0.5		Lipids and lipid-like molecules	Prenol lipids	Terpene lactones	365357
1.03_123.0440m/z	4-Hydroxybenzaldehyde	C7H6O2	1.02553	-0.111172	123.044	pos	M+H	126	RGHHSNMVTDWUBI-UHFFFAOYSA-N	C1=CC(=CC=C1C=O)O	1.4	C00633	Organic oxygen compounds	Organooxygen compounds	Carbonyl compounds	341531
6.40_135.1166m/z	Perilla alcohol	C10H16O	6.40278	-1.47049	135.117	pos	M+H-H2O	10819	NDTYTMIUWGWIMO-UHFFFAOYSA-N	CC(=C)C1CCC(=CC1)CO	2.1		Lipids and lipid-like molecules	Prenol lipids	Monoterpenoids	341319
4.83_287.0542m/z	Scutellarein	C15H10O6	4.82712	-2.77809	287.054	pos	M+H	5281697	JVXZRQGOGOXCEC-UHFFFAOYSA-N	C1=CC(=CC=C1C2=CC(=O)C3=C(O2)C=C(C(=C3O)O)O)O	1.4	C10184	Phenylpropanoids and polyketides	Flavonoids	Flavones	326420
1.36_126.0315n	1,3,5-Trihydroxybenzene	C6H6O3	1.36178	-1.7858	144.065	pos	M+NH4, M+ACN+H	359	QCDYQQDYXPDABM-UHFFFAOYSA-N	C1=C(C=C(C=C1O)O)O	0.2	C02183	Benzenoids	Phenols	Benzenetriols and derivatives	321445
4.43_339.0712m/z	Esculin	C15H16O9	4.4256	-2.78897	339.071	neg	M-H	5281417	XHCADAYNFIFUHF-TVKJYDDYSA-N	C1=CC(=O)OC2=CC(=C(C=C21)O[C@H]3[C@@H]([C@H]([C@@H]([C@H](O3)CO)O)O)O)O	-0.6	C09264	Phenylpropanoids and polyketides	Coumarins and derivatives	Coumarin glycosides	312635
5.14_427.1590m/z	N-methyl-N-(2-(pyridin-2-yl)ethyl)-2-(2,3,5-trimethyl-7-oxo-7H-furo[3,2-g]chromen-6-yl)acetamide	C24H24N2O4	5.13593	-9.58635	427.159	pos	M+Na									306713
10.14_474.2617m/z	PE(18:3/0:0)	C23H42NO7P	10.1425	-2.00421	474.262	neg	M-H	9547068	BBYWOYAFBUOUFP-JOCHJYFZSA-N	CCCCCCCCCCCCCCCCCC(=O)OC[C@H](COP(=O)(O)OCCN)O	3.4		Lipids and lipid-like molecules	Glycerophospholipids	Glycerophosphoethanolamines	302690
5.98_181.0502m/z	Syringaldehyde	C9H10O4	5.97972	-2.17245	181.05	neg	M-H	8655	KCDXJAYRVLXPFO-UHFFFAOYSA-N	COC1=CC(=CC(=C1O)OC)C=O	0		Benzenoids	Phenols	Methoxyphenols	298279
0.85_174.1121m/z	swainsonine	C8H15NO3	0.848983	-1.88655	174.112	pos	M+H	51683	FXUAIOOAOAVCGD-WCTZXXKLSA-N	C1C[C@H]([C@@H]2[C@@H]([C@@H](CN2C1)O)O)O	-1.3	C10173	Organoheterocyclic compounds	Indolizidines		297973
0.88_208.9853m/z	Dehydroascorbic acid	C6H6O6	0.880417	-3.21876	208.985	neg	M+Cl	440667	SBJKKFFYIZUCET-JLAZNSOCSA-N	C([C@@H]([C@@H]1C(=O)C(=O)C(=O)O1)O)O	-1	C05422	Organoheterocyclic compounds	Lactones	Gamma butyrolactones	291599
7.16_263.1282m/z	(+)-Abscisic acid	C15H20O4	7.15988	-2.6738	263.128	neg	M-H	5280896	JLIDBLDQVAYHNE-YKALOCIXSA-N	CC1=CC(=O)CC([C@]1(/C=C/C(=C\C(=O)O)/C)O)(C)C	1.6	C06082	Lipids and lipid-like molecules	Prenol lipids	Sesquiterpenoids	287987
14.81_857.5163n	GPSer(22:6/20:3)	C48H76NO10P	14.8067	-5.16601	858.524	pos	M+H, M+Na									285156
3.65_109.0292m/z	Pyrocatechol	C6H6O2	3.64662	-3.08043	109.029	neg	M-H	289	YCIMNLLNPGFGHC-UHFFFAOYSA-N	C1=CC=C(C(=C1)O)O	0.9	C00090	Benzenoids	Phenols	Benzenediols	284243
6.60_329.0659m/z	Jaceosidin	C17H14O7	6.6025	-2.48081	329.066	neg	M-H	5379096	GLAAQZFBFGEBPS-UHFFFAOYSA-N	COC1=C(C=CC(=C1)C2=CC(=O)C3=C(O2)C=C(C(=C3O)OC)O)O	1.7		Phenylpropanoids and polyketides	Flavonoids	O-methylated flavonoids	270769
4.60_360.2119m/z	Leu Glu Val	C16H29N3O6	4.6033	-2.85705	360.212	pos	M+H	145456420	HVJVUYQWFYMGJS-GVXVVHGQSA-N	CC(C)C[C@@H](C(=O)N[C@@H](CCC(=O)O)C(=O)N[C@@H](C(C)C)C(=O)O)N	-3.4		Organic acids and derivatives	Carboxylic acids and derivatives	Amino acids, peptides, and analogues	266226
8.13_325.2001m/z	(2E,4E)-12-hydroxy-13-(hydroxymethyl)-3,5,7-trimethyltetradeca-2,4-dienedioic acid	C18H30O6	8.1322	-2.43931	325.2	pos	M+H-H2O	10405119	QFZISQBFEIXWDM-UTLPMFLDSA-N	CC(CCCCC(C(CO)C(=O)O)O)C/C(=C/C(=C/C(=O)O)/C)/C	3.2		Lipids and lipid-like molecules	Fatty Acyls	Fatty acids and conjugates	264496
1.90_346.0539m/z	3',5'-cyclic GMP	C10H12N5O7P	1.90113	-2.3812	346.054	pos	M+H	135398570	ZOOGRGPOEVQQDX-UUOKFMHZSA-N	C1[C@@H]2[C@H]([C@H]([C@@H](O2)N3C=NC4=C3N=C(NC4=O)N)O)OP(=O)(O1)O	-3.4	C00942	Nucleosides, nucleotides, and analogues	Purine nucleotides	Cyclic purine nucleotides	258921
6.15_301.0336m/z	myricetin	C15H10O8	6.1472	-2.10564	301.034	pos	M+H-H2O	5281672	IKMDFBPHZNJCSN-UHFFFAOYSA-N	C1=C(C=C(C(=C1O)O)O)C2=C(C(=O)C3=C(C=C(C=C3O2)O)O)O	1.2	C10107	Phenylpropanoids and polyketides	Flavonoids	Flavones	256349
5.84_227.0910m/z	Isoferulic Acid	C10H10O4	5.83575	-2.30847	227.091	pos	M+CH3OH+H	736186	QURCVMIEKCOAJU-HWKANZROSA-N	COC1=C(C=C(C=C1)/C=C/C(=O)O)O	1.5	C10470	Phenylpropanoids and polyketides	Cinnamic acids and derivatives	Hydroxycinnamic acids and derivatives	253948
3.81_229.1541m/z	Leu Pro	C11H20N2O3	3.81435	-2.33177	229.154	pos	M+H									241192
5.98_183.0649m/z	4-Hydroxy-3,5-dimethoxybenzaldehyde	C9H10O4	5.98267	-1.77566	183.065	pos	M+H	8655	KCDXJAYRVLXPFO-UHFFFAOYSA-N	COC1=CC(=CC(=C1O)OC)C=O	0	C02201	Benzenoids	Phenols	Methoxyphenols	240623
8.27_248.1407n	1-Hydroxy-4(15),11(13)-eudesmadien-12,6-olide	C15H20O3	8.27448	-2.15154	249.148	pos	M+H, M+CH3OH+H									228090
6.66_439.2294m/z	Thr Arg Tyr	C19H30N6O6	6.6587	-1.18485	439.229	pos	M+H									228026
5.27_289.1176m/z	Honokiol	C18H18O2	5.2673	-8.56735	289.118	pos	M+Na	72303	FVYXIJYOAGAUQK-UHFFFAOYSA-N	C=CCC1=CC(=C(C=C1)O)C2=CC(=C(C=C2)O)CC=C	5	C10630	Benzenoids	Benzene and substituted derivatives	Biphenyls and derivatives	226209
10.79_303.1583m/z	Nordihydroguaiaretic acid	C18H22O4	10.7931	-2.54267	303.158	pos	M+H	4534	HCZKYJDFEPMADG-UHFFFAOYSA-N	CC(CC1=CC(=C(C=C1)O)O)C(C)CC2=CC(=C(C=C2)O)O	4.3	C10719	Lignans, neolignans and related compounds	Dibenzylbutane lignans		223748
0.83_221.0896n	N-Acetyl-D-Glucosamine	C8H15NO6	0.831017	-1.70479	222.097	pos	M+H, M+H-2H2O	439174	OVRNDRQMDRJTHS-RTRLPJTCSA-N	CC(=O)N[C@@H]1[C@H]([C@@H]([C@H](OC1O)CO)O)O	-1.7	C00140	Organic oxygen compounds	Organooxygen compounds	Carbohydrates and carbohydrate conjugates	218641
11.58_522.3543m/z	PC(18:1/0:0)	C26H52NO7P	11.5786	-2.06931	522.354	pos	M+H	16081932	YAMUFBLWGFFICM-PTGWMXDISA-N	CCCCCCCC/C=C\CCCCCCCC(=O)OC[C@H](COP(=O)([O-])OCC[N+](C)(C)C)O	5.7		Lipids and lipid-like molecules	Glycerophospholipids	Glycerophosphocholines	211948
5.99_174.0556m/z	Indoleacetic acid	C10H9NO2	5.98958	-2.67928	174.056	neg	M-H	802	SEOVTRFCIGRIMH-UHFFFAOYSA-N	C1=CC=C2C(=C1)C(=CN2)CC(=O)O	1.4	C00954	Organoheterocyclic compounds	Indoles and derivatives	Indolyl carboxylic acids and derivatives	202855
10.15_480.3076m/z	PC(15:1/0:0)	C23H46NO7P	10.1516	-1.7664	480.308	pos	M+H	24779458	RJZVWDTYEWCUAR-JOCHJYFZSA-N	CCCCCCCCCCCCCCC(=O)OC[C@H](COP(=O)([O-])OCC[N+](C)(C)C)O	5		Lipids and lipid-like molecules	Glycerophospholipids	Glycerophosphocholines	202717
4.31_465.1026m/z	Glucodistylin	C21H22O12	4.31108	-2.68753	465.103	neg	M-H	14187088	FVQOMEDMFUMIMO-UHFFFAOYSA-N	C1=CC(=C(C=C1C2C(C(=O)C3=C(C=C(C=C3O2)O)O)OC4C(C(C(C(O4)CO)O)O)O)O)O	-0.1		Phenylpropanoids and polyketides	Flavonoids	Flavonoid glycosides	199861
6.31_345.1465m/z	[4-(4-chlorophenyl)piperazin-1-yl]-(5,6,7,8-tetrahydroimidazo[1,2-a]pyridin-2-yl)methanone	C18H21ClN4O	6.31398	-3.29401	345.147	pos	M+H									196265
5.16_344.2535m/z	Leu Val Leu	C17H33N3O4	5.1575	-2.49802	344.254	pos	M+H	11515702	FPPCCQGECVKLDY-IHRRRGAJSA-N	CC(C)C[C@@H](C(=O)N[C@@H](C(C)C)C(=O)N[C@@H](CC(C)C)C(=O)O)N	-1.6		Organic acids and derivatives	Carboxylic acids and derivatives	Amino acids, peptides, and analogues	194361
8.00_317.0648m/z	Isorhamnetin	C16H12O7	8.00352	-2.45512	317.065	pos	M+H	5281654	IZQSVPBOUDKVDZ-UHFFFAOYSA-N	COC1=C(C=CC(=C1)C2=C(C(=O)C3=C(C=C(C=C3O2)O)O)O)O	1.9	C10084	Phenylpropanoids and polyketides	Flavonoids	Flavones	193627
4.74_263.1385m/z	Phe Pro	C14H18N2O3	4.73788	-2.14883	263.138	pos	M+H	7020642	WEQJQNWXCSUVMA-RYUDHWBXSA-N	C1C[C@H](N(C1)C(=O)[C@H](CC2=CC=CC=C2)N)C(=O)O	-1.4		Organic acids and derivatives	Carboxylic acids and derivatives	Amino acids, peptides, and analogues	187448
0.82_112.0506m/z	Cytosine	C4H5N3O	0.821567	0.87657	112.051	pos	M+H	597	OPTASPLRGRRNAP-UHFFFAOYSA-N	C1=C(NC(=O)N=C1)N	-1.7	C00380	Organoheterocyclic compounds	Diazines	Pyrimidines and pyrimidine derivatives	186574
5.76_242.1745m/z	1,2,4-Trideoxy-3-C-methyl-4-{[(2E,4E)-2-methyl-2,4-hexadienoyl]amino}pentitol	C13H23NO3	5.75683	-2.2095	242.175	pos	M+H									180938
0.84_146.0921m/z	4-Guanidinobutanoic acid	C5H11N3O2	0.840283	-2.31742	146.092	pos	M+H	500	TUHVEAJXIMEOSA-UHFFFAOYSA-N	C(CC(=O)O)CN=C(N)N	-1.5		Organic acids and derivatives	Carboxylic acids and derivatives	Amino acids, peptides, and analogues	180759
4.32_295.1646m/z	Tyr Leu	C15H22N2O4	4.3232	-2.02224	295.165	pos	M+H	4466134	AUEJLPRZGVVDNU-UHFFFAOYSA-N	CC(C)CC(C(=O)O)NC(=O)C(CC1=CC=C(C=C1)O)N	-1.8		Organic acids and derivatives	Carboxylic acids and derivatives	Amino acids, peptides, and analogues	178065
6.44_243.1230m/z	4-Oxododecanedioic acid	C12H20O5	6.43565	-3.17996	243.123	neg	M-H	13213508	HHXMOTDTSDYYEI-UHFFFAOYSA-N	C(CCCC(=O)CCC(=O)O)CCCC(=O)O	1.1		Organic acids and derivatives	Keto acids and derivatives	Medium-chain keto acids and derivatives	177623
5.10_190.0495m/z	Kynurenic acid	C10H7NO3	5.09542	-1.93646	190.05	pos	M+H	3845	HCZHHEIFKROPDY-UHFFFAOYSA-N	C1=CC=C2C(=C1)C(=O)C=C(N2)C(=O)O	1.3	C01717	Organoheterocyclic compounds	Quinolines and derivatives	Quinoline carboxylic acids	175928
0.84_99.0443m/z	Tulipalin A	C5H6O2	0.840283	2.51506	99.0443	pos	M+H	68352	GSLDEZOOOSBFGP-UHFFFAOYSA-N	C=C1CCOC1=O	0.8	C20578	Organoheterocyclic compounds	Lactones	Gamma butyrolactones	174638
5.50_433.1130m/z	Hemiphloin	C21H22O10	5.49628	-2.4104	433.113	neg	M-H	160711	QKPKGDDHOGIEOO-JVVVWQBKSA-N	C1[C@H](OC2=C(C1=O)C(=C(C(=C2)O)[C@H]3[C@@H]([C@H]([C@@H]([C@H](O3)CO)O)O)O)O)C4=CC=C(C=C4)O	-0.1		Phenylpropanoids and polyketides	Flavonoids	Flavonoid glycosides	173613
0.82_360.1491m/z	-Gentiobiose	C12H22O11	0.821567	-2.78675	360.149	pos	M+NH4	441422	DLRVVLDZNNYCBX-LIZSDCNHSA-N	C([C@@H]1[C@H]([C@@H]([C@H]([C@@H](O1)OC[C@@H]2[C@H]([C@@H]([C@H]([C@@H](O2)O)O)O)O)O)O)O)O	-4.7	C08240	Organic oxygen compounds	Organooxygen compounds	Carbohydrates and carbohydrate conjugates	172686
8.71_302.3046m/z	Sphinganine	C18H39NO2	8.70905	-2.35934	302.305	pos	M+H	91486	OTKJDMGTUTTYMP-ZWKOTPCHSA-N	CCCCCCCCCCCCCCC[C@H]([C@H](CO)N)O	5.8	C00836	Organic nitrogen compounds	Organonitrogen compounds	Amines	170993
4.23_261.1438m/z	gamma-Glutamylleucine	C11H20N2O5	4.2333	-2.54579	261.144	pos	M+H	151023	MYFMARDICOWMQP-YUMQZZPRSA-N	CC(C)C[C@@H](C(=O)O)NC(=O)CC[C@@H](C(=O)O)N	-2.4		Organic acids and derivatives	Carboxylic acids and derivatives	Amino acids, peptides, and analogues	170978
10.04_468.3074m/z	PC(14:0/0:0)	C22H46NO7P	10.0355	-2.31023	468.307	pos	M+H	24779456	JXGLGTFMAQOJBB-HEDKFQSOSA-N	CCCC/C=C\CCCCCCCC(=O)OC[C@H](COP(=O)([O-])OCC[N+](C)(C)C)O	3.5		Lipids and lipid-like molecules	Glycerophospholipids	Glycerophosphocholines	168607
7.49_317.0649m/z	3-O-Methylquercetin	C16H12O7	7.48722	-2.24022	317.065	pos	M+H	5280681	WEPBGSIAWZTEJR-UHFFFAOYSA-N	COC1=C(OC2=CC(=CC(=C2C1=O)O)O)C3=CC(=C(C=C3)O)O	2.5	C04443	Phenylpropanoids and polyketides	Flavonoids	O-methylated flavonoids	164211
8.55_257.0814m/z	2',4',6'-Trihydroxydihydrochalcone	C15H14O4	8.55238	-2.17529	257.081	neg	M-H	1226045	QWQGMMRHTWIOGH-UHFFFAOYSA-N	C1=CC=C(C=C1)CCC(=O)C2=C(C=C(C=C2O)O)O	3	C09618	Phenylpropanoids and polyketides	Linear 1,3-diarylpropanoids	Chalcones and dihydrochalcones	163742
8.37_221.1895m/z	Caryophyllene epoxide	C15H24O	8.3666	-2.23875	221.189	pos	M+H	14350	NVEQFIOZRFFVFW-UHFFFAOYSA-N	CC1(CC2C1CCC3(C(O3)CCC2=C)C)C	3.6	C16908	Lipids and lipid-like molecules	Prenol lipids	Sesquiterpenoids	163594
4.70_337.1017m/z	N-[4-(dimethylsulfamoyl)phenyl]-2-(4-fluorophenyl)acetamide	C16H17FN2O3S	4.6955	0.00232897	337.102	pos	M+H									157666
7.32_492.2431m/z	N-cyclohexyl-4-[4-(1,2-dihydroacenaphthylen-3-ylsulfonyl)piperazin-1-yl]-6-methylpyrimidin-2-amine	C27H33N5O2S	7.32263	0.693174	492.243	pos	M+H									157635
4.41_332.2172m/z	Val Thr Leu	C15H29N3O5	4.41345	-2.37852	332.217	pos	M+H	101986938	LCHZBEUVGAVMKS-RHYQMDGZSA-N	C[C@H]([C@@H](C(=O)N[C@@H](CC(C)C)C(=O)O)NC(=O)[C@H](C(C)C)N)O	-2		Organic acids and derivatives	Carboxylic acids and derivatives	Amino acids, peptides, and analogues	157204
5.40_378.2378m/z	Val Leu Phe	C20H31N3O4	5.4035	-2.39486	378.238	pos	M+H	101750924	ZZGPVSZDZQRJQY-ULQDDVLXSA-N	CC(C)C[C@@H](C(=O)N[C@@H](CC1=CC=CC=C1)C(=O)O)NC(=O)[C@H](C(C)C)N	-1.3		Organic acids and derivatives	Carboxylic acids and derivatives	Amino acids, peptides, and analogues	156651
2.36_122.0964m/z	Phenethylamine	C8H11N	2.36202	-0.248526	122.096	pos	M+H					C05332				153293
4.74_149.0595m/z	(E)-Cinnamic acid	C9H8O2	4.73788	-1.69515	149.059	pos	M+H	444539	WBYWAXJHAXSJNI-VOTSOKGWSA-N	C1=CC=C(C=C1)/C=C/C(=O)O	2.1	C10438	Phenylpropanoids and polyketides	Cinnamic acids and derivatives	Cinnamic acids	151159
9.23_328.2299m/z	Altrenogest	C21H26O2	9.23203	8.94887	328.23	pos	M+NH4									150981
6.22_99.0807m/z	2-Hexenal	C6H10O	6.21638	2.54059	99.0807	pos	M+H					C08497				149787
1.69_260.1599m/z	Gln Ile	C11H21N3O4	1.69367	-2.35077	260.16	pos	M+H	7020102	CNPNWGHRMBQHBZ-ZKWXMUAHSA-N	CC[C@H](C)[C@@H](C(=O)N[C@@H](CCC(=O)N)C(=O)O)N	-4.2		Organic acids and derivatives	Carboxylic acids and derivatives	Amino acids, peptides, and analogues	148155
0.84_160.0965m/z	Acetyl-Valine	C7H13NO3	0.840283	-2.05566	160.096	pos	M+H									147532
5.95_161.0594m/z	6-Methylcoumarin	C10H8O2	5.94685	-1.96934	161.059	pos	M+H	7092	FXFYOPQLGGEACP-UHFFFAOYSA-N	CC1=CC2=C(C=C1)OC(=O)C=C2	1.8		Phenylpropanoids and polyketides	Coumarins and derivatives		144761
4.46_318.2016m/z	Ser Val Leu	C14H27N3O5	4.45763	-2.31123	318.202	pos	M+H	145457935	YEDSOSIKVUMIJE-DCAQKATOSA-N	CC(C)C[C@@H](C(=O)O)NC(=O)[C@H](C(C)C)NC(=O)[C@H](CO)N	-2.3		Organic acids and derivatives	Carboxylic acids and derivatives	Amino acids, peptides, and analogues	144736
10.61_311.2207m/z	9-Oxo-12,13-Epoxy-10-Octadecenoic acid	C18H30O4	10.6101	-3.17293	311.221	pos	M+H	5283007	RCMABBHQYMBYKV-BUHFOSPRSA-N	CCCCCC1C(O1)/C=C/C(=O)CCCCCCCC(=O)O	4		Lipids and lipid-like molecules	Fatty Acyls	Fatty acids and conjugates	143847
9.87_233.1103m/z	N-Cyclohexyl-2-benzothiazol-amine	C13H16N2S	9.86887	-1.76127	233.11	pos	M+H	591790	UPWPIFMHSFSVLE-UHFFFAOYSA-N	C1CCC(CC1)NC2=NC3=CC=CC=C3S2	4.4		Organoheterocyclic compounds	Benzothiazoles		143147
6.92_339.1228m/z	alpha-guaiaconic acid	C20H20O5	6.92015	-2.89214	339.123	neg	M-H	165795	OIXPKFRMEUTHOG-UHFFFAOYSA-N	CC1=C(OC(=C1C)C2=CC(=C(C=C2)O)OC)C3=CC(=C(C=C3)O)OC	4.3		Organoheterocyclic compounds	Furans	Diphenylfurans	137547
5.39_369.1173m/z	3-O-Feruloylquinic acid	C17H20O9	5.3928	-1.94776	369.117	pos	M+H	9799386	RAGZUCNPTLULOL-KJJWLSQTSA-N	COC1=C(C=CC(=C1)/C=C/C(=O)O[C@@H]2C[C@@](C[C@H]([C@H]2O)O)(C(=O)O)O)O	-0.1	C02572	Organic oxygen compounds	Organooxygen compounds	Alcohols and polyols	131095
1.34_267.0725m/z	Inosine	C10H12N4O5	1.34272	-3.79398	267.072	neg	M-H	135398641	UGQMRVRMYYASKQ-KQYNXXCUSA-N	C1=NC2=C(C(=O)N1)N=CN2[C@H]3[C@@H]([C@@H]([C@H](O3)CO)O)O	-1.3	C00294	Nucleosides, nucleotides, and analogues	Purine nucleosides		126656
5.89_289.1540m/z	Indole-3-acetyl-L-leucine	C16H20N2O3	5.8911	-2.4074	289.154	pos	M+H	3945661	HCZNPUHZYPPINM-UHFFFAOYSA-N	CC(C)CC(C(=O)O)NC(=O)CC1=CNC2=CC=CC=C21	2.5		Organic acids and derivatives	Carboxylic acids and derivatives	Amino acids, peptides, and analogues	125943
11.16_452.2772m/z	PE(16:0/0:0)	C21H44NO7P	11.1572	-2.42875	452.277	neg	M-H	9547069	YVYMBNSKXOXSKW-HXUWFJFHSA-N	CCCCCCCCCCCCCCCC(=O)OC[C@H](COP(=O)(O)OCCN)O	2.4		Lipids and lipid-like molecules	Glycerophospholipids	Glycerophosphoethanolamines	122623
0.89_348.0695m/z	3'-AMP	C10H14N5O7P	0.89425	-2.50979	348.069	pos	M+H	41211	LNQVTSROQXJCDD-KQYNXXCUSA-N	C1=NC(=C2C(=N1)N(C=N2)[C@H]3[C@@H]([C@@H]([C@H](O3)CO)OP(=O)(O)O)O)N	-2.7	C01367	Nucleosides, nucleotides, and analogues	Ribonucleoside 3'-phosphates		120867
8.57_309.2064m/z	9S-Hydroperoxy-10E,12Z,15Z-octadecatrienoic acid	C18H30O4	8.57472	-2.47921	309.206	neg	M-H	6450029	RWKJTIHNYSIIHW-MEBVTJQTSA-N	CC/C=C\C/C=C\C=C\[C@H](CCCCCCCC(=O)O)OO	4.7		Lipids and lipid-like molecules	Fatty Acyls	Lineolic acids and derivatives	118802
5.53_177.0553m/z	Coniferaldehyde	C10H10O3	5.52565	-2.53857	177.055	neg	M-H	5280536	DKZBBWMURDFHNE-NSCUHMNNSA-N	COC1=C(C=CC(=C1)/C=C/C=O)O	1.5	C02666	Benzenoids	Phenols	Methoxyphenols	117027
5.76_301.0336m/z	Isodemethylwedelolactone	C15H8O7	5.75683	-2.21423	301.034	pos	M+H	5318547	OBEHELRBTWMPHI-UHFFFAOYSA-N	C1=C(C=C(C2=C1C3=C(C4=CC(=C(C=C4O3)O)O)C(=O)O2)O)O	2.1		Phenylpropanoids and polyketides	Isoflavonoids	Coumestans	116024
8.85_201.1634m/z	Alpha-Calacorene	C15H20	8.84733	-1.94323	201.163	pos	M+H	12302243	CUUMXRBKJIDIAY-ZDUSSCGKSA-N	CC1=CC[C@H](C2=C1C=CC(=C2)C)C(C)C	4.4		Lipids and lipid-like molecules	Prenol lipids	Sesquiterpenoids	112525
5.56_434.1206n	Naringenin 5-O-beta-D-glucopyranoside	C21H22O10	5.55783	-1.50029	435.128	pos	M+H-H2O, M+H	3083618	MFQIWHVVFBCURA-KYSZGLPYSA-N	C1[C@@H](OC2=C(C1=O)C(=CC(=C2)O)O[C@H]3[C@@H]([C@H]([C@@H]([C@H](O3)CO)O)O)O)C4=CC=C(C=C4)O	0		Phenylpropanoids and polyketides	Flavonoids	Flavonoid glycosides	112473
0.91_383.1183m/z	Quinic acid	C7H12O6	0.91045	-3.07894	383.118	neg	2M-H	6508	AAWZDTNXLSGCEK-LNVDRNJUSA-N	C1[C@H](C([C@@H](CC1(C(=O)O)O)O)O)O	-2.4	C00296	Organic oxygen compounds	Organooxygen compounds	Alcohols and polyols	111946
8.80_218.9616m/z	2,4-Dichlorophenoxyacetic acid	C8H6Cl2O3	8.80318	-2.51552	218.962	neg	M-H	1486	OVSKIKFHRZPJSS-UHFFFAOYSA-N	C1=CC(=C(C=C1Cl)Cl)OCC(=O)O	2.8	C03664	Benzenoids	Benzene and substituted derivatives	Phenoxyacetic acid derivatives	109611
4.40_345.2125m/z	Val Asn Ile	C15H28N4O5	4.40257	-2.21376	345.212	pos	M+H	145458953	VHRLUTIMTDOVCG-PEDHHIEDSA-N	CC[C@H](C)[C@@H](C(=O)N[C@@H]([C@@H](C)CC)C(=O)O)NC(=O)[C@H](C(C)C)N	-2.1		Organic acids and derivatives	Carboxylic acids and derivatives	Amino acids, peptides, and analogues	109179
6.55_168.1016m/z	p-Synephrine	C9H13NO2	6.54805	-2.03726	168.102	pos	M+H	7172	YRCWQPVGYLYSOX-UHFFFAOYSA-N	CNCC(C1=CC=C(C=C1)O)O	-0.6	C01869	Benzenoids	Phenols	1-hydroxy-2-unsubstituted benzenoids	107987
6.39_424.1271m/z	1-(4-oxo-4h-chromen-3-yl)-2,3,4,9-tetrahydro-1h-beta-carboline-3-carboxylic acid	C21H16N2O4	6.39213	0.994421	424.127	pos	M+ACN+Na									107504
11.53_219.1739m/z	Muurolladie-3-One	C15H22O	11.5287	-2.1023	219.174	pos	M+H	3989419	LMILVXQXGKTFSZ-UHFFFAOYSA-N	CC1=CCC(C2C1CC(=O)C(=C2)C)C(C)C	3.2		Lipids and lipid-like molecules	Prenol lipids	Sesquiterpenoids	107368
5.46_133.0646m/z	cinnamaldehyde	C9H8O	5.45875	-1.45893	133.065	pos	M+H	637511	KJPRLNWUNMBNBZ-QPJJXVBHSA-N	C1=CC=C(C=C1)/C=C/C=O	1.9	C00903	Phenylpropanoids and polyketides	Cinnamaldehydes		106257
4.78_330.2379m/z	Leu Val Val	C16H31N3O4	4.78375	-2.51762	330.238	pos	M+H	11559237	FTKXYXACXYOHND-XUXIUFHCSA-N	CC[C@H](C)[C@@H](C(=O)N[C@@H](CC(C)C)C(=O)O)NC(=O)[C@H](C(C)C)N	0		Organic acids and derivatives	Carboxylic acids and derivatives	Amino acids, peptides, and analogues	102375
4.94_359.2279m/z	Ile Asn Ile	C16H30N4O5	4.9398	-2.7189	359.228	pos	M+H	145457149	KIEPQOIQHFKQLK-PCBIJLKTSA-N	CC[C@H](C)[C@@H](C(=O)O)NC(=O)[C@H](CC(=O)N)NC(=O)[C@H](CC1=CC=CC=C1)N	-2.9		Organic acids and derivatives	Carboxylic acids and derivatives	Amino acids, peptides, and analogues	101101
11.22_315.1932m/z	7-oxodehydroabietic acid	C20H26O3	11.2223	-7.23012	315.193	pos	M+H	29212	MSWJSDLNPCSSNW-MISYRCLQSA-N	CC(C)C1=CC2=C(C=C1)[C@]3(CCC[C@@]([C@@H]3CC2=O)(C)C(=O)O)C	4.5		Lipids and lipid-like molecules	Prenol lipids	Diterpenoids	100203
10.95_313.2376m/z	9,10-Dihydroxy-12Z-octadecenoic acid	C18H34O4	10.9524	-2.53894	313.238	neg	M-H	9966640	XEBKSQSGNGRGDW-YFHOEESVSA-N	CCCCC/C=C\CC(C(CCCCCCCC(=O)O)O)O	4.6		Lipids and lipid-like molecules	Fatty Acyls	Fatty acids and conjugates	99198.1
5.71_303.1331m/z	(5R)-trans-1,7-diphenyl-5-hydroxy-6-hepten-3-one	C19H20O2	5.71025	-8.57766	303.133	pos	M+Na	13347321	NEQGOKAKPXXESR-ACCUITESSA-N	C1=CC=C(C=C1)CCC(=O)CC(/C=C/C2=CC=CC=C2)O	3.3		Phenylpropanoids and polyketides	Diarylheptanoids	Linear diarylheptanoids	98470.7
3.60_312.1295m/z	N2,N2-Dimethylguanosine	C12H17N5O5	3.60143	-2.51607	312.129	pos	M+H	135501639	RSPURTUNRHNVGF-IOSLPCCCSA-N	CN(C)C1=NC2=C(C(=O)N1)N=CN2[C@H]3[C@@H]([C@@H]([C@H](O3)CO)O)O	-1.3		Nucleosides, nucleotides, and analogues	Purine nucleosides		98403.3
0.81_90.0553m/z	Alanine	C3H7NO2	0.8108	3.88351	90.0553	pos	M+H	602	QNAYBMKLOCPYGJ-UHFFFAOYSA-N	CC(C(=O)O)N	-3	C01401	Organic acids and derivatives	Carboxylic acids and derivatives	Amino acids, peptides, and analogues	93552.3
10.60_451.2832m/z	Celastrol	C29H38O4	10.5979	-2.32685	451.283	pos	M+H	122724	KQJSQWZMSAGSHN-JJWQIEBTSA-N	CC1=C(C(=O)C=C2C1=CC=C3[C@]2(CC[C@@]4([C@@]3(CC[C@@]5([C@H]4C[C@](CC5)(C)C(=O)O)C)C)C)C)O	5.9		Lipids and lipid-like molecules	Prenol lipids	Triterpenoids	93498.8
10.61_482.3234m/z	PC(15:0/0:0)	C23H48NO7P	10.6101	-1.56104	482.323	pos	M+H	24779458	RJZVWDTYEWCUAR-JOCHJYFZSA-N	CCCCCCCCCCCCCCC(=O)OC[C@H](COP(=O)([O-])OCC[N+](C)(C)C)O	5		Lipids and lipid-like molecules	Glycerophospholipids	Glycerophosphocholines	93371.8
5.18_325.0911m/z	Skimmin	C15H16O8	5.17893	-1.99345	325.091	pos	M+H	99693	VPAOSFFTKWUGAD-TVKJYDDYSA-N	C1=CC(=CC2=C1C=CC(=O)O2)O[C@H]3[C@@H]([C@H]([C@@H]([C@H](O3)CO)O)O)O	-0.7		Phenylpropanoids and polyketides	Coumarins and derivatives	Coumarin glycosides	93220
4.87_346.1964m/z	Asp Val Leu	C15H27N3O6	4.87192	-2.39953	346.196	pos	M+H	145454616	GIKOVDMXBAFXDF-NHCYSSNCSA-N	CC(C)C[C@@H](C(=O)O)NC(=O)[C@H](C(C)C)NC(=O)[C@H](CC(=O)O)N	-3.8		Organic acids and derivatives	Carboxylic acids and derivatives	Amino acids, peptides, and analogues	93114
5.22_225.0763m/z	Ethyl syringate	C11H14O5	5.21757	-2.35332	225.076	neg	M-H	19845	WKUVKFZZCHINKG-UHFFFAOYSA-N	CCOC(=O)C1=CC(=C(C(=C1)OC)O)OC	1.7		Benzenoids	Benzene and substituted derivatives	Benzoic acids and derivatives	92895.5
2.93_295.1646m/z	Ile Tyr	C15H22N2O4	2.93335	-2.26329	295.165	pos	M+H	7408195	MUFXDFWAJSPHIQ-XDTLVQLUSA-N	CC[C@H](C)[C@@H](C(=O)N[C@@H](CC1=CC=C(C=C1)O)C(=O)O)N	-2.2		Organic acids and derivatives	Carboxylic acids and derivatives	Amino acids, peptides, and analogues	92450.8
7.50_315.0503m/z	6-Methoxyluteolin	C16H12O7	7.49582	-2.19427	315.05	neg	M-H	5317284	FHHSEFRSDKWJKJ-UHFFFAOYSA-N	COC1=C(C2=C(C=C1O)OC(=CC2=O)C3=CC(=C(C=C3)O)O)O	1.4		Phenylpropanoids and polyketides	Flavonoids	O-methylated flavonoids	92428.6
6.82_311.1271m/z	15,16-Dihydrotanshinone I	C18H14O3	6.81825	-2.54853	311.127	pos	M+CH3OH+H	11425923	HARGZZNYNSYSGJ-JTQLQIEISA-N	C[C@H]1COC2=C1C(=O)C(=O)C3=C2C=CC4=C(C=CC=C43)C	3.2		Lipids and lipid-like molecules	Prenol lipids	Diterpenoids	91304.3
7.17_327.1220m/z	7-Acetoxy-2-methylisoflavone	C18H14O4	7.17002	-2.53229	327.122	pos	M+CH3OH+H									90915.8
7.83_303.1595m/z	2,6-dihydroxy-7-methoxy-1,1,4a-trimethyl-3,4,10,10a-tetrahydro-2H-phenanthren-9-one	C18H24O4	7.83223	-2.40858	303.159	neg	M-H									90740.6
10.53_249.1480m/z	Atractylenolide III	C15H20O3	10.525	-1.96416	249.148	pos	M+H	155948	FBMORZZOJSDNRQ-GLQYFDAESA-N	CC1=C2C[C@H]3C(=C)CCC[C@@]3(C[C@@]2(OC1=O)O)C	2.1	C17887	Lipids and lipid-like molecules	Prenol lipids	Terpene lactones	89495.8
0.86_323.0277m/z	Uridine 5'-monophosphate	C9H13N2O9P	0.861783	-2.8557	323.028	neg	M-H	6030	DJJCXFVJDGTHFX-XVFCMESISA-N	C1=CN(C(=O)NC1=O)[C@H]2[C@@H]([C@@H]([C@H](O2)COP(=O)(O)O)O)O	-3.6	C00105	Nucleosides, nucleotides, and analogues	Pyrimidine nucleotides	Pyrimidine ribonucleotides	88809.9
2.63_223.1073m/z	Gly Phe	C11H14N2O3	2.62638	-2.08951	223.107	pos	M+H	6992304	GLUBLISJVJFHQS-VIFPVBQESA-N	C1=CC=C(C=C1)C[C@@H](C(=O)NCC(=O)O)N	-2.5		Organic acids and derivatives	Carboxylic acids and derivatives	Amino acids, peptides, and analogues	85320.5
5.17_244.0878n	biotin	C10H16N2O3S	5.16785	-1.49061	245.095	pos	M+H-H2O, M+H	171548	YBJHBAHKTGYVGT-ZKWXMUAHSA-N	C1[C@H]2[C@@H]([C@@H](S1)CCCCC(=O)O)NC(=O)N2	0.3	C00120	Organoheterocyclic compounds	Biotin and derivatives		84967.6
7.35_359.0765m/z	Jaceidin	C18H16O8	7.3489	-2.0693	359.076	neg	M-H	5464461	XUWTZJRCCPNNJR-UHFFFAOYSA-N	COC1=C(C=CC(=C1)C2=C(C(=O)C3=C(O2)C=C(C(=C3O)OC)O)OC)O	2.8		Phenylpropanoids and polyketides	Flavonoids	O-methylated flavonoids	84881.7
3.18_149.0240m/z	3-Hydroxymandelic acid	C8H8O4	3.18133	-2.53531	149.024	neg	M-H2O-H	86957	OLSDAJRAVOVKLG-UHFFFAOYSA-N	C1=CC(=CC(=C1)O)C(C(=O)O)O	-0.1	C11527	Benzenoids	Phenols	1-hydroxy-4-unsubstituted benzenoids	81580.2
5.45_275.1383m/z	IAA-Val	C15H18N2O3	5.44825	-2.58177	275.138	pos	M+H	446641	AZEGJHGXTSUPPG-AWEZNQCLSA-N	CC(C)[C@@H](C(=O)O)NC(=O)CC1=CNC2=CC=CC=C21	2.1		Organic acids and derivatives	Carboxylic acids and derivatives	Amino acids, peptides, and analogues	79749.6
7.55_213.1127m/z	2,2'-(3-Methylcyclohexane-1,1-diyl)diacetic acid	C11H18O4	7.54962	-2.54241	213.113	neg	M-H	220370	HJPDHTDUPWGUHP-UHFFFAOYSA-N	CC1CCCC(C1)(CC(=O)O)CC(=O)O	2.1		Organic acids and derivatives	Carboxylic acids and derivatives	Dicarboxylic acids and derivatives	79734
7.99_315.0504m/z	Rhamnetin	C16H12O7	7.99383	-1.89989	315.05	neg	M-H	5281691	JGUZGNYPMHHYRK-UHFFFAOYSA-N	COC1=CC(=C2C(=C1)OC(=C(C2=O)O)C3=CC(=C(C=C3)O)O)O	1.9	C10176	Phenylpropanoids and polyketides	Flavonoids	Flavones	77230.2
6.09_191.0699m/z	6-Methoxy-4-methylcoumarin	C11H10O3	6.09282	-2.09148	191.07	pos	M+H	223821	KNGPIBWCWOQBEK-UHFFFAOYSA-N	CC1=CC(=O)OC2=C1C=C(C=C2)OC	2.2		Phenylpropanoids and polyketides	Coumarins and derivatives		76125.4
7.91_331.0804m/z	3,7-Di-O-methylquercetin	C17H14O7	7.90968	-2.40999	331.08	pos	M+H	5280417	LUJAXSNNYBCFEE-UHFFFAOYSA-N	COC1=CC(=C2C(=C1)OC(=C(C2=O)OC)C3=CC(=C(C=C3)O)O)O	2.8	C01265	Phenylpropanoids and polyketides	Flavonoids	O-methylated flavonoids	76032.2
8.67_211.1324m/z	Jasmonic acid	C12H18O3	8.67458	-2.04791	211.132	pos	M+H	5281166	ZNJFBWYDHIGLCU-HWKXXFMVSA-N	CC/C=C\C[C@@H]1[C@H](CCC1=O)CC(=O)O	1.6	C08491	Lipids and lipid-like molecules	Fatty Acyls	Lineolic acids and derivatives	75397.6
4.34_359.2279m/z	Gln Val Leu	C16H30N4O5	4.34452	-2.64717	359.228	pos	M+H	145455275	VEYGCDYMOXHJLS-GVXVVHGQSA-N	CC(C)C[C@@H](C(=O)O)NC(=O)[C@H](C(C)C)NC(=O)[C@H](CCC(=O)N)N	-4.1		Organic acids and derivatives	Carboxylic acids and derivatives	Amino acids, peptides, and analogues	73401.1
4.26_326.0993n	Melilotoside	C15H18O8	4.26128	-2.55402	325.092	neg	M-H, M+Cl	5280759	GVRIYIMNJGULCZ-ZMKUSUEASA-N	C1=CC=C(C(=C1)/C=C/C(=O)O)O[C@H]2[C@@H]([C@H]([C@@H]([C@H](O2)CO)O)O)O	-0.4		Organic oxygen compounds	Organooxygen compounds	Carbohydrates and carbohydrate conjugates	73079.5
10.80_359.1116m/z	Gardenin B	C19H18O7	10.8045	-2.72598	359.112	pos	M+H	96539	LXEVSYZNYDZSOB-UHFFFAOYSA-N	COC1=CC=C(C=C1)C2=CC(=O)C3=C(C(=C(C(=C3O2)OC)OC)OC)O	3.3	C15109	Phenylpropanoids and polyketides	Flavonoids	O-methylated flavonoids	72714.5
5.05_410.1912m/z	Tyr Asp Ile	C19H27N3O7	5.05055	-2.3766	410.191	pos	M+H	145454476	RTXQQDVBACBSCW-CFMVVWHZSA-N	CC[C@H](C)[C@@H](C(=O)N[C@@H](CC1=CC=C(C=C1)O)C(=O)O)NC(=O)[C@H](CC(=O)O)N	-2.9		Organic acids and derivatives	Carboxylic acids and derivatives	Amino acids, peptides, and analogues	71714.6
4.38_222.0764m/z	Acetyl-Tyrosine	C11H13NO4	4.37607	-3.4315	222.076	neg	M-H	68310	CAHKINHBCWCHCF-JTQLQIEISA-N	CC(=O)N[C@@H](CC1=CC=C(C=C1)O)C(=O)O	-0.2		Organic acids and derivatives	Carboxylic acids and derivatives	Amino acids, peptides, and analogues	70618.6
1.92_298.1138m/z	3'-O-Methylguanosine	C11H15N5O5	1.92273	-2.67994	298.114	pos	M+H	135742509	UYARPHAXAJAZLU-KQYNXXCUSA-N	CO[C@@H]1[C@H](O[C@H]([C@@H]1O)N2C=NC3=C2N=C(NC3=O)N)CO	-1.9		Nucleosides, nucleotides, and analogues	Purine nucleosides		70526.9
7.37_207.0648m/z	Scoparone	C11H10O4	7.36903	-2.0089	207.065	pos	M+H	8417	GUAFOGOEJLSQBT-UHFFFAOYSA-N	COC1=C(C=C2C(=C1)C=CC(=O)O2)OC	1.9	C09311	Phenylpropanoids and polyketides	Coumarins and derivatives		69966.6
10.08_170.0727n	2-Hyroxybiphenyl	C12H10O	10.0821	-2.9801	171.08	pos	M+H, M+ACN+H, M+H-H2O					C02499				66963.3
6.43_323.1382m/z	Indole-3-acetyl-L-phenylalanine	C19H18N2O3	6.42505	-2.58382	323.138	pos	M+H	644227	BUGQHORRADGONS-KRWDZBQOSA-N	C1=CC=C(C=C1)C[C@@H](C(=O)O)NC(=O)CC2=CNC3=CC=CC=C32	2		Organic acids and derivatives	Carboxylic acids and derivatives	Amino acids, peptides, and analogues	66043
9.80_299.1998m/z	14-Deoxyandrographolide	C20H30O4	9.79925	-2.21486	299.2	pos	M+H-2H2O	11624161	GVRNTWSGBWPJGS-YSDSKTICSA-N	C[C@@]12CC[C@H]([C@@]([C@H]1CCC(=C)[C@H]2CCC3=CCOC3=O)(C)CO)O	3.4		Lipids and lipid-like molecules	Prenol lipids	Terpene lactones	64887.7
1.03_188.0560m/z	N-Acetyl-L-glutamic acid	C7H11NO5	1.02993	-2.54333	188.056	neg	M-H	70914	RFMMMVDNIPUKGG-YFKPBYRVSA-N	CC(=O)N[C@@H](CCC(=O)O)C(=O)O	-1.8	C00624	Organic acids and derivatives	Carboxylic acids and derivatives	Amino acids, peptides, and analogues	64880.6
15.03_218.0154m/z	Arecoline hydrobromide	C8H14BrNO2	15.0281	-9.03877	218.015	pos	M+H-H2O									64868.9
6.14_247.1071m/z	N-Acetyl-tryptophan	C13H14N2O3	6.13697	-2.39291	247.107	pos	M+H	700653	DZTHIGRZJZPRDV-LBPRGKRZSA-N	CC(=O)N[C@@H](CC1=CNC2=CC=CC=C21)C(=O)O	1.1	C03137	Organic acids and derivatives	Carboxylic acids and derivatives	Amino acids, peptides, and analogues	63314.7
8.13_333.2063m/z	5(S)-HpEPE	C20H30O4	8.13115	-2.5685	333.206	neg	M-H	5283184	NKXYOIJDQPQELO-GHWNLOBHSA-N	CC/C=C\C/C=C\C/C=C\C/C=C\C=C\[C@H](CCCC(=O)O)OO	4.6		Lipids and lipid-like molecules	Fatty Acyls	Eicosanoids	59978.5
5.19_243.1333m/z	Glutamylleucine	C11H20N2O5	5.19045	-2.37703	243.133	pos	M+H-H2O	9856500	YBAFDPFAUTYYRW-YUMQZZPRSA-N	CC(C)C[C@@H](C(=O)O)NC(=O)[C@H](CCC(=O)O)N	-3.3		Organic acids and derivatives	Carboxylic acids and derivatives	Amino acids, peptides, and analogues	58968.8
4.67_225.0864m/z	Hydroxykynurenine	C10H12N2O4	4.6731	-2.47593	225.086	pos	M+H	89	VCKPUUFAIGNJHC-UHFFFAOYSA-N	C1=CC(=C(C(=C1)O)N)C(=O)CC(C(=O)O)N	-2.5	C02794	Organic oxygen compounds	Organooxygen compounds	Carbonyl compounds	58774.1
3.55_294.1209n	Glu Phe	C14H18N2O5	3.55045	-2.26396	295.128	pos	M+H-H2O, M+H	19365626	XMBSYZWANAQXEV-UHFFFAOYSA-N	C1=CC=C(C=C1)CC(C(=O)O)NC(=O)C(CCC(=O)O)N	-3	C01425	Organic acids and derivatives	Carboxylic acids and derivatives	Amino acids, peptides, and analogues	57019.6
11.49_198.1041n	o-Methylbenzhydrol	C14H14O	11.4919	-2.07245	181.101	pos	M+H-H2O, M+H	95659	MXHXXJOHFRHBFB-UHFFFAOYSA-N	CC1=CC=CC=C1C(C2=CC=CC=C2)O	3.1		Benzenoids	Benzene and substituted derivatives	Diphenylmethanes	56565.1
6.75_353.1827n	4-(butan-2-yl)phenyl 2-(acetylamino)-2-deoxy-beta-D-glucopyranoside	C18H27NO6	6.75292	-3.1243	354.19	pos	M+H-H2O, M+H	16398230	NZLBBWKRFWAHOK-NTCFCCFRSA-N	CCC(C)C1=CC=C(C=C1)O[C@H]2[C@@H]([C@H]([C@@H]([C@H](O2)CO)O)O)NC(=O)C	1.8		Organic oxygen compounds	Organooxygen compounds	Carbohydrates and carbohydrate conjugates	56307.7
4.70_401.1069m/z	4-(4-chlorophenoxy)-N-[5-methyl-4-(4-methylphenyl)-1,3-thiazol-2-yl]butanamide	C21H21ClN2O2S	4.6955	-4.00735	401.107	pos	M+H									54257.9
1.89_207.1125m/z	(S)-alpha-Amino-beta-phenylpropionicacid	C9H11NO2	1.89043	-1.71084	207.113	pos	M+ACN+H					C00079				54144.6
8.26_423.1289m/z	Campestrinoside	C20H24O10	8.25885	-1.79317	423.129	neg	M-H									53558.6
0.77_118.0507m/z	Threonine	C4H9NO3	0.765683	-2.41894	118.051	neg	M-H	6288	AYFVYJQAPQTCCC-GBXIJSLDSA-N	C[C@H]([C@@H](C(=O)O)N)O	-2.9	C00188	Organic acids and derivatives	Carboxylic acids and derivatives	Amino acids, peptides, and analogues	50896.1
7.55_345.0606m/z	5,7,3',4'-Tetrahydroxy-6,8-dimethoxyflavone	C17H14O8	7.54962	-2.86808	345.061	neg	M-H	5321859	GLMWHQIFJIURES-UHFFFAOYSA-N	COC1=C(C(=C2C(=C1O)C(=O)C=C(O2)C3=CC(=C(C=C3)O)O)OC)O	2.3	C04581	Phenylpropanoids and polyketides	Flavonoids	O-methylated flavonoids	49135
8.18_175.0396m/z	4-Methylumbelliferone	C10H8O3	8.18495	-2.50269	175.04	neg	M-H	5280567	HSHNITRMYYLLCV-UHFFFAOYSA-N	CC1=CC(=O)OC2=C1C=CC(=C2)O	1.9	C03081	Phenylpropanoids and polyketides	Coumarins and derivatives	Hydroxycoumarins	49114.2
6.49_357.1336m/z	Pinoresinol	C20H22O6	6.48685	-2.23956	357.134	neg	M-H	73399	HGXBRUKMWQGOIE-AFHBHXEDSA-N	COC1=C(C=CC(=C1)[C@@H]2[C@H]3CO[C@@H]([C@H]3CO2)C4=CC(=C(C=C4)O)OC)O	2.3	C05366	Lignans, neolignans and related compounds	Furanoid lignans		48665.9
4.78_148.9522m/z	Trifluoromethanesulfonic acid	CHF3O3S	4.78298	-2.68289	148.952	neg	M-H									48585.5
5.53_360.2119m/z	Asp Ile Ile	C16H29N3O6	5.5345	-2.68238	360.212	pos	M+H	145454467	NHSDEZURHWEZPN-SXTJYALSSA-N	CC[C@H](C)[C@@H](C(=O)N[C@@H]([C@@H](C)CC)C(=O)O)NC(=O)[C@H](CC(=O)O)N	-3.3		Organic acids and derivatives	Carboxylic acids and derivatives	Amino acids, peptides, and analogues	48255.7
0.90_187.0720m/z	NAlpha-Acetyl-L-glutamine	C7H12N2O4	0.899833	-2.51338	187.072	neg	M-H	182230	KSMRODHGGIIXDV-YFKPBYRVSA-N	CC(=O)N[C@@H](CCC(=O)N)C(=O)O	-1.4		Organic acids and derivatives	Carboxylic acids and derivatives	Amino acids, peptides, and analogues	48097.2
1.07_211.0595m/z	7,8-Dihydroxycoumarin	C9H6O4	1.07498	-3.28826	211.06	pos	M+CH3OH+H	5280569	ATEFPOUAMCWAQS-UHFFFAOYSA-N	C1=CC(=C(C2=C1C=CC(=O)O2)O)O	1.2	C03093	Phenylpropanoids and polyketides	Coumarins and derivatives	Hydroxycoumarins	47397.8
3.74_282.1190m/z	N6-Methyladenosine	C11H15N5O4	3.73987	-2.30331	282.119	pos	M+H	102175	VQAYFKKCNSOZKM-IOSLPCCCSA-N	CNC1=C2C(=NC=N1)N(C=N2)[C@H]3[C@@H]([C@@H]([C@H](O3)CO)O)O	-0.4		Nucleosides, nucleotides, and analogues	Purine nucleosides		47000.9
12.78_169.0140m/z	Gallic acid	C7H6O5	12.776	-1.45982	169.014	neg	M-H	370	LNTHITQWFMADLM-UHFFFAOYSA-N	C1=C(C=C(C(=C1O)O)O)C(=O)O	0.7	C01424	Benzenoids	Benzene and substituted derivatives	Benzoic acids and derivatives	44965.2
4.59_341.1376m/z	Clemaphenol A	C20H22O6	4.59303	-2.12413	341.138	pos	M+H-H2O	46173999	VRHZMFGDDGFRLP-AFHBHXEDSA-N	COC1=C(C=C(C=C1)[C@@H]2[C@H]3CO[C@@H]([C@H]3CO2)C4=CC(=C(C=C4)OC)O)O	2.3	C17808	Lignans, neolignans and related compounds	Furanoid lignans		43908.8
5.60_401.1081m/z	Gentiopicroside	C16H20O9	5.59642	-2.32703	401.108	neg	M+FA-H	88708	DUAGQYUORDTXOR-GPQRQXLASA-N	C=C[C@H]1[C@@H](OC=C2C1=CCOC2=O)O[C@H]3[C@@H]([C@H]([C@@H]([C@H](O3)CO)O)O)O	-1.2	C09782	Organic oxygen compounds	Organooxygen compounds	Carbohydrates and carbohydrate conjugates	43864.8
1.54_293.0540m/z	1-Methylpseudouridine	C10H14N2O6	1.5421	-2.32785	293.054	neg	M+Cl	99543	UVBYMVOUBXYSFV-XUTVFYLZSA-N	CN1C=C(C(=O)NC1=O)[C@H]2[C@@H]([C@@H]([C@H](O2)CO)O)O	-2.6		Nucleosides, nucleotides, and analogues	Nucleoside and nucleotide analogues		43529.9
7.01_195.1012m/z	Methoxyeugenol	C11H14O3	7.01192	-1.69032	195.101	pos	M+H	226486	FWMPKHMKIJDEMJ-UHFFFAOYSA-N	COC1=CC(=CC(=C1O)OC)CC=C	2.6		Benzenoids	Phenols	Methoxyphenols	43442.3
8.31_261.1115m/z	7-O-Prenylscopoletin	C15H16O4	8.30978	-2.28276	261.112	pos	M+H	1764914	ZLPLFUBVEZVYDX-UHFFFAOYSA-N	CC(=CCOC1=C(C=C2C=CC(=O)OC2=C1)OC)C	3.4		Phenylpropanoids and polyketides	Coumarins and derivatives		43144.5
6.59_245.1379m/z	9-(2,3-Dihydroxypropoxy)-9-oxononanoic acid	C12H22O6	6.59313	-1.74935	245.138	pos	M+H-H2O	45783154	BQRISQXLSXCXSC-UHFFFAOYSA-N	C(CCCC(=O)O)CCCC(=O)OCC(CO)O	0.8		Lipids and lipid-like molecules	Fatty Acyls	Fatty acids and conjugates	42923
4.17_374.2277m/z	Ile Leu Glu	C17H31N3O6	4.16655	-2.26851	374.228	pos	M+H	145456189	HUORUFRRJHELPD-MNXVOIDGSA-N	CC[C@H](C)[C@@H](C(=O)N[C@@H](CC(C)C)C(=O)N[C@@H](CCC(=O)O)C(=O)O)N	-1.7		Organic acids and derivatives	Carboxylic acids and derivatives	Amino acids, peptides, and analogues	42348.4
8.08_177.0542m/z	ferulic acid	C10H10O4	8.07818	-1.91609	177.054	pos	M+H-H2O	445858	KSEBMYQBYZTDHS-HWKANZROSA-N	COC1=C(C=CC(=C1)/C=C/C(=O)O)O	1.5	C01494	Phenylpropanoids and polyketides	Cinnamic acids and derivatives	Hydroxycinnamic acids and derivatives	41793.8
9.34_287.1385m/z	(2-methoxyphenyl)-[2-(5-methyl-1,2-oxazol-3-yl)pyrrolidin-1-yl]methanone	C16H18N2O3	9.33643	-1.76233	287.139	pos	M+H									41439
4.74_429.1327m/z	Morroniside	C17H26O11	4.73788	-9.89381	429.133	pos	M+Na	11228693	YTZSBJLNMIQROD-SFBCHFHNSA-N	C[C@H]1[C@@H]2[C@H](C[C@@H](O1)O)C(=CO[C@H]2O[C@H]3[C@@H]([C@H]([C@@H]([C@H](O3)CO)O)O)O)C(=O)OC	-1.8	C17000	Organic oxygen compounds	Organooxygen compounds	Carbohydrates and carbohydrate conjugates	41002.2
7.01_138.0193m/z	2-Nitrophenol	C6H5NO3	7.00763	-2.38461	138.019	neg	M-H	6947	IQUPABOKLQSFBK-UHFFFAOYSA-N	C1=CC=C(C(=C1)[N+](=O)[O-])O	1.8	C01988	Benzenoids	Phenols	Nitrophenols	40204.3
0.72_147.0528n	L-glutamic acid	C5H9NO4	0.717533	-2.32084	146.046	neg	M-H, M+K-2H	33032	WHUUTDBJXJRKMK-VKHMYHEASA-N	C(CC(=O)O)[C@@H](C(=O)O)N	-3.7	C00025	Organic acids and derivatives	Carboxylic acids and derivatives	Amino acids, peptides, and analogues	39777.4
3.97_280.1053n	Asp Phe	C13H16N2O5	3.96703	-2.28402	281.113	pos	M+H, M+Na									39050.4
7.79_247.1334m/z	Pechueloic Acid	C15H20O3	7.79167	-2.40411	247.133	neg	M-H	24094149	ZFHSKBJBODQVBX-AXTRIDKLSA-N	C[C@H]1CC[C@H](CC2=C(C(=O)C[C@@H]12)C)C(=C)C(=O)O	2.4		Lipids and lipid-like molecules	Prenol lipids	Sesquiterpenoids	38612.1
7.92_137.1322m/z	beta-Myrcene	C10H16	7.92032	-2.11185	137.132	pos	M+H	31253	UAHWPYUMFXYFJY-UHFFFAOYSA-N	CC(=CCCC(=C)C=C)C	4.3	C06074	Lipids and lipid-like molecules	Prenol lipids	Monoterpenoids	38521.4
10.77_277.2163m/z	13-Hydroxy-9Z,11E-octadecadienoic acid	C18H32O3	10.7738	-3.32933	277.216	neg	M-H2O-H	5282947	HNICUWMFWZBIFP-BSZOFBHHSA-N	CCCCCC(/C=C/C=C\CCCCCCCC(=O)O)O	5.3	C04056	Lipids and lipid-like molecules	Fatty Acyls	Lineolic acids and derivatives	38240.5
9.10_387.2269m/z	MDL 72832 HCL	C22H30N2O4	9.10157	-2.29669	387.227	pos	M+H									37460.6
4.47_160.1329m/z	DL-2-Aminooctanoic acid	C8H17NO2	4.46777	-1.66601	160.133	pos	M+H	69522	AKVBCGQVQXPRLD-UHFFFAOYSA-N	CCCCCCC(C(=O)O)N	-0.5		Organic acids and derivatives	Carboxylic acids and derivatives	Amino acids, peptides, and analogues	37191.8
8.48_369.1324m/z	Isopsoralidin	C20H16O5	8.48395	-2.51488	369.132	pos	M+CH3OH+H	12304285	JWCDJOWFOVBBCP-UHFFFAOYSA-N	CC1(CCC2=CC3=C(C=C2O1)OC(=O)C4=C3OC5=C4C=CC(=C5)O)C	4.1		Phenylpropanoids and polyketides	Isoflavonoids	Coumestans	36724.6
4.53_293.1139m/z	Glutamylphenylalanine	C14H18N2O5	4.52912	-1.50468	293.114	neg	M-H	111299	XHHOHZPNYFQJKL-QWRGUYRKSA-N	C1=CC=C(C=C1)C[C@@H](C(=O)O)NC(=O)CC[C@@H](C(=O)O)N	-3		Organic acids and derivatives	Carboxylic acids and derivatives	Amino acids, peptides, and analogues	36625.2
5.81_397.1487m/z	[3-[2-(4-fluoroanilino)pyrimidin-4-yl]piperidin-1-yl]-(5-methylthiophen-2-yl)methanone	C21H21FN4OS	5.81235	-1.48132	397.149	pos	M+H									35891.5
11.77_365.2677m/z	16,16-dimethyl-PGE1	C22H38O5	11.7668	-2.37795	365.268	pos	M+H-H2O	5283058	RQOFITYRYPQNLL-ZWSAOQBFSA-N	CCCCC(C)(C)[C@@H](/C=C/[C@H]1[C@@H](CC(=O)[C@@H]1CCCCCCC(=O)O)O)O	4		Lipids and lipid-like molecules	Fatty Acyls	Eicosanoids	34964.5
5.77_165.0543m/z	4-Hydroxycinnamic acid	C9H8O3	5.76893	-1.96814	165.054	pos	M+H	637542	NGSWKAQJJWESNS-ZZXKWVIFSA-N	C1=CC(=CC=C1/C=C/C(=O)O)O	1.5	C00811	Phenylpropanoids and polyketides	Cinnamic acids and derivatives	Hydroxycinnamic acids and derivatives	34626.7
11.60_365.2678m/z	1a,1b-dihomo PGF2Alpha	C22H38O5	11.6036	-2.24441	365.268	pos	M+H-H2O	6443812	ZCTAOAWRUXSOQF-GWSKAPOCSA-N	CCCCC[C@@H](/C=C/[C@H]1[C@@H](C[C@@H]([C@@H]1C/C=C\CCCCCC(=O)O)O)O)O	3.8		Lipids and lipid-like molecules	Fatty Acyls	Eicosanoids	34277.2
6.38_306.1362m/z	Brevicarine	C17H21N3	6.37967	-1.89249	306.136	pos	M+K	5490034	OMGIBPZQATWNBX-UHFFFAOYSA-N	CC1=NC=C(C2=C1NC3=CC=CC=C32)CCCCNC	3.3		Alkaloids and derivatives	Harmala alkaloids		33913.7
4.27_346.2329m/z	Ile Leu Thr	C16H31N3O5	4.26653	-2.23864	346.233	pos	M+H	145456197	PHRWFSFCNJPWRO-PPCPHDFISA-N	CC[C@H](C)[C@@H](C(=O)N[C@@H](CC(C)C)C(=O)N[C@@H]([C@@H](C)O)C(=O)O)N	-2.1		Organic acids and derivatives	Carboxylic acids and derivatives	Amino acids, peptides, and analogues	33135.9
3.94_314.2068m/z	Pro Val Val	C15H27N3O4	3.94425	-2.07209	314.207	pos	M+H	15199694	FHJQROWZEJFZPO-SRVKXCTJSA-N	CC(C)[C@@H](C(=O)N[C@@H](C(C)C)C(=O)O)NC(=O)[C@@H]1CCCN1	-2.2		Organic acids and derivatives	Carboxylic acids and derivatives	Amino acids, peptides, and analogues	32383
10.39_263.2363m/z	Farnesyl acetone	C18H30O	10.3907	-2.33539	263.236	pos	M+H	1711945	LTUMRKDLVGQMJU-IUBLYSDUSA-N	CC(=CCC/C(=C/CC/C(=C/CCC(=O)C)/C)/C)C	5.6		Lipids and lipid-like molecules	Prenol lipids	Diterpenoids	28245
10.10_247.1334m/z	5,9-dihydroxy-5,7,7-trimethyl-4,5a,6,8,8a,9-hexahydro-1H-azuleno[5,6-c]furan-3-one	C15H22O4	10.0972	-1.9485	247.133	neg	M-H2O-H	156145	MWDNWQAVYQDZQI-UHFFFAOYSA-N	CC1(CC2C(C1)C(CC3=C(C2O)C(OC3=O)O)(C)O)C	0.2		Lipids and lipid-like molecules	Prenol lipids	Terpene lactones	27534.3
1.79_201.1240m/z	Alanylisoleucine	C9H18N2O3	1.78603	-2.51522	201.124	neg	M-H									27451.7
9.67_193.0492m/z	scopoletin	C10H8O4	9.66895	-1.72739	193.049	pos	M+H	5280460	RODXRVNMMDRFIK-UHFFFAOYSA-N	COC1=C(C=C2C(=C1)C=CC(=O)O2)O	1.5	C01752	Phenylpropanoids and polyketides	Coumarins and derivatives	Hydroxycoumarins	26844.4
3.73_318.2016m/z	Ser Leu Val	C14H27N3O5	3.72937	-2.29113	318.202	pos	M+H	101769071	IXZHZUGGKLRHJD-DCAQKATOSA-N	CC(C)C[C@@H](C(=O)N[C@@H](C(C)C)C(=O)O)NC(=O)[C@H](CO)N	-2.3		Organic acids and derivatives	Carboxylic acids and derivatives	Amino acids, peptides, and analogues	26638
6.37_160.0400m/z	2-Indolecarboxylic acid	C9H7NO2	6.3669	-2.73444	160.04	neg	M-H	72899	HCUARRIEZVDMPT-UHFFFAOYSA-N	C1=CC=C2C(=C1)C=C(N2)C(=O)O	2.3		Organoheterocyclic compounds	Indoles and derivatives	Indolecarboxylic acids and derivatives	26081.8
8.93_255.1584m/z	Gliocladic acid	C14H22O4	8.92902	-2.56588	255.158	pos	M+H	6439616	SLVSUVFUFJKMCV-MZGZCWAVSA-N	CC(C)[C@@H]1CCC(=C[C@H]1/C=C(\CO)/C(=O)O)CO	1.1		Lipids and lipid-like molecules	Prenol lipids	Monoterpenoids	25887.7
11.38_296.2577m/z	linolenic acid	C18H30O2	11.3811	-2.47055	296.258	pos	M+NH4	5280934	DTOSIQBPPRVQHS-PDBXOOCHSA-N	CC/C=C\C/C=C\C/C=C\CCCCCCCC(=O)O	5.9	C01595	Lipids and lipid-like molecules	Fatty Acyls	Lineolic acids and derivatives	25332.2
14.79_192.1378m/z	N-Ethyl-N-Methylcathinone	C12H17NO	14.7949	-2.41443	192.138	pos	M+H	43794825	LOQPFJRCXJZNQV-UHFFFAOYSA-N	CCN(C)C(C)C(=O)C1=CC=CC=C1	2.4		Organic oxygen compounds	Organooxygen compounds	Carbonyl compounds	24269.7
9.59_177.0543m/z	Monoethyl phthalate	C10H10O4	9.5857	-1.74231	177.054	pos	M+H-H2O	75318	YWWHKOHZGJFMIE-UHFFFAOYSA-N	CCOC(=O)C1=CC=CC=C1C(=O)O	1.8		Benzenoids	Benzene and substituted derivatives	Benzoic acids and derivatives	24225.9
14.87_175.1186m/z	L-Arginine	C6H14N4O2	14.8731	-1.82563	175.119	pos	M+H	6322	ODKSFYDXXFIFQN-BYPYZUCNSA-N	C(C[C@@H](C(=O)O)N)CN=C(N)N	-4.2	C00062	Organic acids and derivatives	Carboxylic acids and derivatives	Amino acids, peptides, and analogues	24204
5.67_433.1126m/z	Vitexin	C21H20O10	5.66643	-0.732791	433.113	pos	M+H	5280441	SGEWCQFRYRRZDC-VPRICQMDSA-N	C1=CC(=CC=C1C2=CC(=O)C3=C(O2)C(=C(C=C3O)O)[C@H]4[C@@H]([C@H]([C@@H]([C@H](O4)CO)O)O)O)O	0.2	C01460	Phenylpropanoids and polyketides	Flavonoids	Flavonoid glycosides	22861.8
5.36_206.0808m/z	Indolelactic acid	C11H11NO3	5.35922	-1.70684	206.081	pos	M+H	92904	XGILAAMKEQUXLS-UHFFFAOYSA-N	C1=CC=C2C(=C1)C(=CN2)CC(C(=O)O)O	1.5		Organoheterocyclic compounds	Indoles and derivatives	Indolyl carboxylic acids and derivatives	22406.3
10.08_158.0729n	1-Naphthylmethanol	C11H10O	10.0821	-1.9841	141.07	pos	M+H-H2O, M+H									20978.1
5.19_565.1554m/z	Corymboside	C26H28O14	5.19045	0.300749	565.155	pos	M+H	13644660	OVMFOVNOXASTPA-UHFFFAOYSA-N	C1C(C(C(C(O1)C2=C(C(=C3C(=C2O)C(=O)C=C(O3)C4=CC=C(C=C4)O)C5C(C(C(C(O5)CO)O)O)O)O)O)O)O	-2.2		Phenylpropanoids and polyketides	Flavonoids	Flavonoid glycosides	20858.8
7.53_269.0812m/z	2',5'-Dihydroxy-4-methoxychalcone	C16H14O4	7.52822	-2.64447	269.081	neg	M-H									18366.1
5.29_447.0922m/z	Isoorientin	C21H20O11	5.28958	-2.32403	447.092	neg	M-H	114776	ODBRNZZJSYPIDI-VJXVFPJBSA-N	C1=CC(=C(C=C1C2=CC(=O)C3=C(O2)C=C(C(=C3O)[C@H]4[C@@H]([C@H]([C@@H]([C@H](O4)CO)O)O)O)O)O)O	-0.2	C01821	Phenylpropanoids and polyketides	Flavonoids	Flavonoid glycosides	17660.9
13.41_271.2271m/z	2-hydroxyhexadecanoic acid	C16H32O3	13.4103	-2.77141	271.227	neg	M-H	92836	JGHSBPIZNUXPLA-UHFFFAOYSA-N	CCCCCCCCCCCCCCC(C(=O)O)O	6.4		Lipids and lipid-like molecules	Fatty Acyls	Fatty acids and conjugates	16996.4
0.71_132.0299m/z	L-aspartic acid	C4H7NO4	0.706783	-2.2517	132.03	neg	M-H	5960	CKLJMWTZIZZHCS-REOHCLBHSA-N	C([C@@H](C(=O)O)N)C(=O)O	-2.8	C00049	Organic acids and derivatives	Carboxylic acids and derivatives	Amino acids, peptides, and analogues	15720.5
12.48_205.1947m/z	gamma-Cadinene	C15H24	12.4766	-2.08135	205.195	pos	M+H	92313	WRHGORWNJGOVQY-RBSFLKMASA-N	CC1=C[C@H]2[C@H](CC1)C(=C)CC[C@@H]2C(C)C	4.3	C19738	Lipids and lipid-like molecules	Prenol lipids	Sesquiterpenoids	12695.2
7.89_329.0659m/z	3,6-Dimethoxyapigenin	C17H14O7	7.88715	-2.33255	329.066	neg	M-H									11838
7.99_339.1218m/z	Coniferyl ferulate	C20H20O6	7.99103	-2.56014	339.122	pos	M+H-H2O					C17855				8927.43
4.13_382.1712m/z	Trans-Zeatin-o-glucoside	C16H23N5O6	4.1318	-2.51039	382.171	pos	M+H	5461146	UUPDCCPAOMDMPT-HNVSNYHQSA-N	C/C(=C\CNC1=NC=NC2=C1NC=N2)/CO[C@H]3[C@@H]([C@H]([C@@H]([C@H](O3)CO)O)O)O	-0.9	C03423	Lipids and lipid-like molecules	Fatty Acyls	Fatty acyl glycosides	8346.08
14.78_311.1256m/z	Cl-Amidine	C14H19ClN4O2	14.7823	-4.40048	311.126	pos	M+H					C06060				8082.34
7.86_353.1373m/z	Corylin	C20H16O4	7.86372	-3.1972	353.137	pos	M+CH3OH+H	5316097	PWAACAMQKVIVPZ-UHFFFAOYSA-N	CC1(C=CC2=C(O1)C=CC(=C2)C3=COC4=C(C3=O)C=CC(=C4)O)C	3.7		Phenylpropanoids and polyketides	Isoflavonoids	Pyranoisoflavonoids	7657.84
16.64_99.0449m/z	Tiglic acid	C5H8O2	16.6389	-2.16172	99.0449	neg	M-H	125468	UIERETOOQGIECD-ONEGZZNKSA-N	C/C=C(\C)/C(=O)O	1	C08279	Lipids and lipid-like molecules	Fatty Acyls	Fatty acids and conjugates	5446.84
6.35_147.0449m/z	3-Isochromanone	C9H8O2	6.35462	-2.03498	147.045	neg	M-H					C07728				5277.17
4.66_182.0455m/z	4-Pyridoxic acid	C8H9NO4	4.65563	-2.28415	182.045	neg	M-H	6723	HXACOUQIXZGNBF-UHFFFAOYSA-N	CC1=NC=C(C(=C1O)C(=O)O)CO	0.1	C00847	Organoheterocyclic compounds	Pyridines and derivatives	Pyridinecarboxylic acids and derivatives	3669.53
6.82_593.1854m/z	Acaciin	C28H32O14	6.81825	-1.88757	593.185	pos	M+H	5317025	YFVGIJBUXMQFOF-PJOVQGMDSA-N	C[C@H]1[C@@H]([C@H]([C@H]([C@@H](O1)OC[C@@H]2[C@H]([C@@H]([C@H]([C@@H](O2)OC3=CC(=C4C(=C3)OC(=CC4=O)C5=CC=C(C=C5)OC)O)O)O)O)O)O)O	-0.5		Phenylpropanoids and polyketides	Flavonoids	Flavonoid glycosides	489.837
5.65_431.0972m/z	Saponaretin	C21H20O10	5.64888	-2.63019	431.097	neg	M-H					C01714				0
5.35_463.1227m/z	Swertiajaponin	C22H22O11	5.34753	-1.63817	463.123	pos	M+H	442659	DLVLXOYLQKCAME-DGHBBABESA-N	COC1=C(C(=C2C(=C1)OC(=CC2=O)C3=CC(=C(C=C3)O)O)O)[C@H]4[C@@H]([C@H]([C@@H]([C@H](O4)CO)O)O)O	0.2	C10187	Phenylpropanoids and polyketides	Flavonoids	Flavonoid glycosides	0
6.81_283.0604m/z	Glycitein	C16H12O5	6.81237	-2.69205	283.06	neg	M-H	5317750	DXYUAIFZCFRPTH-UHFFFAOYSA-N	COC1=C(C=C2C(=C1)C(=O)C(=CO2)C3=CC=C(C=C3)O)O	2.4	C14536	Phenylpropanoids and polyketides	Isoflavonoids	Isoflav-2-enes	0
6.82_285.0750m/z	Genkwanin	C16H12O5	6.81825	-2.57415	285.075	pos	M+H	5281617	JPMYFOBNRRGFNO-UHFFFAOYSA-N	COC1=CC(=C2C(=C1)OC(=CC2=O)C3=CC=C(C=C3)O)O	2.1	C10046	Phenylpropanoids and polyketides	Flavonoids	O-methylated flavonoids	0

## Sheet: M. sativa
1,4-cyclohexanedicarboxylic acid	germination rate				trehalose	germination rate				Root	Germination potential	RI	germination rate	RI	seedling height	RI	fresh weight	RI	chlorophyll content	RI	SAE		Stem	Germination potential	RI	germination rate	RI	seedling height	RI	fresh weight	RI	chlorophyll content	RI	SAE		Leaf	Germination potential	RI	germination rate	RI	seedling height	RI	fresh weight	RI	chlorophyll content	RI	SAE		Whole plant
CK	0.9				CK	0.9				CK	0.9		0.92		1.92		23.34		0.57497				CK	0.9		0.92		1.92		23.34		0.57497				CK	0.9		0.92		1.92		23.34		0.57497				CK
CK	0.933333				CK	0.933333				CK	0.9		0.92		2.077		25.62		0.417295				CK	0.9		0.92		2.077		25.62		0.417295				CK	0.9		0.92		2.077		25.62		0.417295				CK
CK	0.966667				CK	0.966667				CK	0.92		0.94		1.966		21.62		0.430625				CK	0.92		0.94		1.966		21.62		0.430625				CK	0.92		0.94		1.966		21.62		0.430625				CK
CK	0.9				CK	0.9				CK	0.9		0.92		1.87		23.72		0.494995				CK	0.9		0.92		1.87		23.72		0.494995				CK	0.9		0.92		1.87		23.72		0.494995				CK
1e-05	0.9				1e-05					0.25	0.9	-0.010989	0.92	-0.0107527	2.915	0.327616	36.93	0.361495	0.40494	-0.155495	0.102375		0.25	0.92	0.0108696	0.92	-0.0107527	2.343	0.163466	34.03	0.307082	0.421585	-0.120782	0.0699765		0.25	0.88	-0.032967	0.92	-0.0107527	1.735	-0.114796	31.58	0.253325	0.562615	0.14773	0.0485078		0.25
1e-05	0.966667				1e-05					0.25	0.88	-0.032967	0.92	-0.0107527	2.407	0.185708	26.85	0.121788	0.41099	-0.142878	0.0241797		0.25	0.76	-0.164835	0.78	-0.16129	1.829	-0.0668367	20.71	-0.121713	0.430625	-0.101929	-0.123321		0.25	0.84	-0.0769231	0.88	-0.0537634	2.02	0.029703	35.47	0.335213	0.367945	-0.232649	0.000316143		0.25
1e-05	0.9				1e-05					0.25	0.94	0.0319149	0.94	0.0106383	2.913	0.327154	30.71	0.232172	0.458325	-0.0441606	0.111544		0.25	0.88	-0.032967	0.9	-0.0322581	2.193	0.106247	33.62	0.298632	0.251625	-0.475235	-0.0271162		0.25	0.84	-0.0769231	0.86	-0.0752688	2.06	0.0485437	28.31	0.167079	0.54604	0.121859	0.037058		0.25
1e-05	0.92				1e-05					0.25	0.92	0.0108696	0.9	-0.0322581	2.75	0.287273	31.49	0.251191	0.44961	-0.0623358	0.0909479		0.25	0.84	-0.0769231	0.86	-0.0752688	1.866	-0.0479592	25.3	0.0679842	0.600585	0.201612	0.013889		0.25	0.88	-0.032967	0.92	-0.0107527	2.016	0.0277778	34.32	0.312937	0.430625	-0.101929	0.0390132		0.25
0.0001	0.9				0.0001					0.5	0.94	0.0319149	0.92	-0.0107527	2.626	0.253618	31.54	0.252378	0.430625	-0.101929	0.0850457		0.5	0.88	-0.032967	0.88	-0.0537634	1.831	-0.0658163	28.26	0.165605	0.15429	-0.678227	-0.133034		0.5	0.7	-0.230769	0.88	-0.0537634	2.166	0.0951062	37.27	0.36732	0.32666	-0.318749	-0.0281711		0.5
0.0001	0.866667				0.0001					0.5	0.94	0.0319149	0.92	-0.0107527	3.043	0.355899	29.37	0.19714	0.515605	0.0700245	0.128845		0.5	0.88	-0.032967	0.86	-0.0752688	2.329	0.158437	35.07	0.32763	0.60631	0.20915	0.117396		0.5	0.66	-0.274725	0.84	-0.0967742	2.102	0.0675547	32.46	0.273567	0.282315	-0.41123	-0.0883215		0.5
0.0001	0.89				0.0001					0.5	0.94	0.0319149	0.94	0.0106383	2.677	0.267837	23.17	-0.0173876	0.616255	0.221913	0.102983		0.5	0.84	-0.0769231	0.82	-0.11828	2.885	0.320624	37.23	0.36664	0.336605	-0.298008	0.0388105		0.5	0.82	-0.0989011	0.88	-0.0537634	2.099	0.066222	32.23	0.268383	0.29467	-0.385464	-0.0407046		0.5
0.0001	0.9				0.0001					0.5	0.86	-0.0549451	0.88	-0.0537634	1.96	0	22.09	-0.0631891	0.640965	0.251909	0.03		0.5	0.86	-0.0549451	0.86	-0.0752688	1.88	-0.0408163	32.04	0.264045	0.34896	-0.272242	-0.0358454		0.5	0.82	-0.0989011	0.84	-0.0967742	2.008	0.0239044	25.69	0.0821331	0.43329	-0.0963712	-0.0372018		0.5
0.001	0.933333				0.001	0.933333				0.75	0.82	-0.0989011	0.88	-0.0537634	1.944	-0.00816327	18.59	-0.21162	0.468595	-0.0227424	-0.0790381		0.75	0.76	-0.164835	0.84	-0.0967742	2.085	0.059952	22.86	-0.0305344	0.345645	-0.279155	-0.102269		0.75	0.52	-0.428571	0.6	-0.354839	1.825	-0.0688776	20.12	-0.146735	0.298635	-0.377195	-0.275243		0.75
0.001	0.9				0.001	0.9				0.75	0.9	-0.010989	0.94	0.0106383	2.041	0.0396864	17.57	-0.254877	0.399285	-0.167289	-0.076566		0.75	0.72	-0.208791	0.78	-0.16129	1.83	-0.0663265	29.71	0.206328	0.352275	-0.265328	-0.0990817		0.75	0.54	-0.406593	0.6	-0.354839	1.749	-0.107653	18.21	-0.227735	0.32666	-0.318749	-0.283114		0.75
0.001	0.9				0.001	0.9				0.75	0.86	-0.0549451	0.88	-0.0537634	1.875	-0.0433673	14.43	-0.388041	0.508975	0.0579105	-0.0964412		0.75	0.84	-0.0769231	0.86	-0.0752688	1.74	-0.112245	26.42	0.107494	0.282965	-0.409875	-0.113363		0.75	0.5	-0.450549	0.78	-0.16129	1.828	-0.0673469	17.12	-0.273961	0.21697	-0.547508	-0.300131		0.75
0.001	0.933333				0.001	0.833333				0.75	0.82	-0.0989011	0.84	-0.0967742	1.927	-0.0168367	15.95	-0.323579	0.276335	-0.423702	-0.191959		0.75	0.78	-0.142857	0.82	-0.11828	1.515	-0.227041	19.28	-0.182358	0.43394	-0.0950156	-0.15311		0.75	0.74	-0.186813	0.82	-0.11828	1.699	-0.133163	21.07	-0.106446	0.19467	-0.594015	-0.227743		0.75
0.005	0.9				0.005	0.866667				1	0.88	-0.032967	0.88	-0.0537634	1.74222	-0.111111	18.8	-0.202714	0.405335	-0.154672	-0.111045		1	0.58	-0.362637	0.72	-0.225806	1.46143	-0.254373	22.29	-0.0547074	0.282965	-0.409875	-0.26148		1	0.26	-0.714286	0.46	-0.505376	1.583	-0.192347	19.46	-0.174724	0.24168	-0.495975	-0.416542		1
0.005	0.866667				0.005	0.9				1	0.78	-0.142857	0.86	-0.0752688	1.952	-0.00408163	16.87	-0.284563	0.471655	-0.0163608	-0.104626		1	0.68	-0.252747	0.9	-0.0322581	1.542	-0.213265	18.86	-0.20017	0.260665	-0.456382	-0.230964		1	0.32	-0.648352	0.5	-0.462366	1.529	-0.219898	18.03	-0.235369	0.33329	-0.304922	-0.374181		1
0.005	0.9				0.005	0.9				1	0.92	0.0108696	0.88	-0.0537634	1.68125	-0.142219	17.68	-0.250212	0.34597	-0.278478	-0.142761		1	0.7	-0.230769	0.78	-0.16129	1.644	-0.161224	26.59	0.1132	0.23264	-0.514828	-0.190982		1	0.24	-0.736264	0.64	-0.311828	1.69	-0.137755	18.23	-0.226887	0.31762	-0.337602	-0.350067		1
0.005	0.933333				0.005	0.866667				1	0.86	-0.0549451	0.86	-0.0752688	1.84	-0.0612245	17.87	-0.242154	0.34838	-0.273452	-0.141409		1	0.72	-0.208791	0.8	-0.139785	1.55	-0.209184	22.58	-0.0424088	0.235955	-0.507914	-0.221617		1	0.46	-0.494505	0.66	-0.290323	1.457	-0.256633	16.82	-0.286684	0.244995	-0.489062	-0.363441		1
0.01	0.833333				0.01	0.933333
0.01	0.933333				0.01	0.933333
0.01	0.933333				0.01	0.866667
0.01	0.9				0.01	0.9
0.1	0.9				0.1	0.666667
0.1	0.766667				0.1	0.933333
0.1	0.833333				0.1	0.9
0.1	0.966667				0.1	0.9
1	0.6				1	0.866667
1	0.533333				1	0.766667
1	0.433333				1	0.9
1	0.4				1	0.966667
[truncated: 11 more columns]

## Sheet: A. sativa
1,4-cyclohexanedicarboxylic acid	germination rate				trehalose	germination rate				Root	Germination potential	RI	germination rate	RI	seedling height	RI	fresh weight	RI	chlorophyll content		SAE		Stem	Germination potential	RI	germination rate	RI	seedling height	RI	fresh weight	RI	chlorophyll content	RI	SAE		Leaf	Germination potential	RI	germination rate	RI	seedling height	RI	fresh weight	RI	chlorophyll content	RI	SAE		Whole plant
CK	0.8				CK	0.9				CK	0.88		0.92		12.005		137.21		0.725945				CK	0.88		0.92		12.005		137.21		0.725945				CK	0.88		0.92		12.005		137.21		0.725945				CK
CK	0.8				CK	0.933333				CK	0.78		0.9		12.11		148.12		0.455335				CK	0.78		0.9		12.11		148.12		0.455335				CK	0.78		0.9		12.11		148.12		0.455335				CK
CK	0.866667				CK	0.966667				CK	0.88		0.9		10.333		142.86		0.609625				CK	0.88		0.9		10.333		142.86		0.609625				CK	0.88		0.9		10.333		142.86		0.609625				CK
CK	0.733333				CK	0.9				CK	0.76		0.88		10.951		124.86		0.44298				CK	0.76		0.88		10.951		124.86		0.44298				CK	0.76		0.88		10.951		124.86		0.44298				CK
1e-05	0.866667				1e-05					0.25	0.9	0.0777778	0.9	0	10.731	-0.0545374	170.21	0.187709	0.48095	-0.141161	0.0139578		0.25	0.88	0.0568182	0.9	0	11.825	0.0401691	155.15	0.108862	0.42731	-0.234897	-0.00580947		0.25	0.9	0.0777778	0.92	0.0217391	10.664	-0.0604405	148.2	0.0670715	0.511	-0.0850492	0.00421973		0.25
1e-05	0.866667				1e-05					0.25	0.9	0.0777778	0.9	0	11.299	-0.00449339	219.7	0.370687	0.49	-0.125	0.0637943		0.25	0.82	-0.0120482	0.88	-0.0222222	11.53	0.0156114	155.72	0.112124	0.61294	0.0888178	0.0364566		0.25	0.78	-0.060241	0.8	-0.111111	11.733	0.032643	182.74	0.243406	0.563	0.0079929	0.0225379		0.25
1e-05	0.88				1e-05					0.25	0.92	0.0978261	0.92	0.0217391	11.967	0.0515585	200.31	0.30977	0.52	-0.0714286	0.081893		0.25	0.72	-0.13253	0.72	-0.2	13.819	0.178667	170.04	0.186897	0.515605	-0.0768039	-0.00875396		0.25	0.74	-0.108434	0.8	-0.111111	10.903	-0.0393833	169.09	0.182329	0.519	-0.0707252	-0.0294649		0.25
1e-05	0.9				1e-05					0.25	0.94	0.117021	0.94	0.0425532	10.78	-0.0502203	157.86	0.124161	0.44	-0.214286	0.00384583		0.25	0.78	-0.060241	0.8	-0.111111	10.216	-0.0999119	129.84	-0.0608998	0.5185	-0.0716204	-0.0807568		0.25	0.9	0.0777778	0.94	0.0425532	10.319	-0.090837	121.73	-0.119557	0.467	-0.163832	-0.050779		0.25
0.0001	0.9				0.0001					0.5	0.78	-0.060241	0.78	-0.133333	8.452	-0.25533	122.88	-0.11124	0.42	-0.25	-0.162029		0.5	0.56	-0.325301	0.58	-0.355556	9.785	-0.137885	161.45	0.143636	0.5816	0.039718	-0.127078		0.5	0.88	0.0568182	0.86	-0.0444444	9.78	-0.138326	126.64	-0.0840446	0.493305	-0.116732	-0.0653458		0.5
0.0001	0.8				0.0001					0.5	0.84	0.0119048	0.86	-0.0444444	9.42	-0.170044	136.98	-0.00925792	0.466255	-0.167402	-0.0758487		0.5	0.78	-0.060241	0.84	-0.0666667	10.516	-0.0734802	132.6	-0.0409374	0.52796	-0.0546822	-0.0592015		0.5	0.88	0.0568182	0.84	-0.0666667	11.115	-0.0207048	112.7	-0.184869	0.251625	-0.549463	-0.152977		0.5
0.0001	0.86				0.0001					0.5	0.84	0.0119048	0.86	-0.0444444	9.389	-0.172775	130.92	-0.0530884	0.53	-0.0535714	-0.062395		0.5	0.82	-0.0120482	0.84	-0.0666667	11.218	-0.01163	141.92	0.0257892	0.552	-0.0116383	-0.0152388		0.5	0.82	-0.0120482	0.88	-0.0222222	8.238	-0.274185	169.26	0.18315	0.678935	0.177388	0.0104166		0.5
0.0001	0.866667				0.0001					0.5	0.86	0.0348837	0.96	0.0625	10.36	-0.0872247	128.02	-0.0740634	0.414305	-0.26017	-0.0648148		0.5	0.82	-0.0120482	0.9	0	9.418	-0.17022	132.36	-0.0426732	0.56593	0.0131288	-0.0423626		0.5	0.86	0.0348837	0.88	-0.0222222	10.817	-0.0469604	119.99	-0.132142	0.79194	0.29477	0.0256657		0.5
0.001	0.9				0.001	0.8				0.75	0.84	0.0119048	0.84	-0.0666667	8.85	-0.220264	142.67	0.0309105	0.46	-0.178571	-0.0845374		0.75	0.74	-0.108434	0.84	-0.0666667	3.659	-0.677621	107.41	-0.22313	0.515605	-0.0768039	-0.230531		0.75	0.86	0.0348837	0.88	-0.0222222	6.849	-0.396564	133.68	-0.033126	0.41827	-0.251083	-0.133622		0.75
0.001	0.866667				0.001	0.8				0.75	0.86	0.0348837	0.9	0	8.139	-0.282907	124.25	-0.101331	0.48	-0.142857	-0.0984423		0.75	0.68	-0.180723	0.76	-0.155556	3.997	-0.647841	104.12	-0.246926	0.515605	-0.0768039	-0.26157		0.75	0.74	-0.108434	0.86	-0.0444444	6.277	-0.44696	112.76	-0.184435	0.46528	-0.166911	-0.190237		0.75
0.001	0.833333				0.001	0.766667				0.75	0.78	-0.060241	0.78	-0.133333	10.451	-0.079207	144.77	0.0449679	0.499285	-0.10842	-0.0672466		0.75	0.72	-0.13253	0.78	-0.133333	6.293	-0.445551	124.06	-0.102705	0.518	-0.0725157	-0.177327		0.75	0.82	-0.0120482	0.86	-0.0444444	8.114	-0.28511	139.3	0.0074659	0.546945	-0.0206893	-0.0709652		0.75
0.001	0.9				0.001	0.833333				0.75	0.88	0.0568182	0.9	0	5.621	-0.504758	99.9	-0.277448	0.4155	-0.258036	-0.196685		0.75	0.64	-0.228916	0.66	-0.266667	5.67222	-0.500245	121.533	-0.12098	0.59727	0.064912	-0.210379		0.75	0.74	-0.108434	0.84	-0.0666667	7.146	-0.370396	104.95	-0.240923	0.616905	0.0946742	-0.138349		0.75
0.005	0.833333				0.005	0.833333				1	0.9	0.0777778	0.9	0	6.776	-0.402996	147.97	0.0656214	0.61294	0.0863706	-0.0341557		1	0.6	-0.277108	0.76	-0.155556	3.478	-0.693568	113.56	-0.178649	0.452925	-0.189033	-0.298783		1	0.76	-0.0843373	0.8	-0.111111	4.81	-0.576211	117.95	-0.146897	0.658975	0.152472	-0.153217		1
0.005	0.866667				0.005	0.833333				1	0.82	-0.0120482	0.82	-0.0888889	6.9	-0.39207	128.2	-0.0727615	0.51326	-0.0834643	-0.129702		1	0.66	-0.204819	0.68	-0.244444	3.684	-0.675419	120.72	-0.126862	0.5593	0.00143036	-0.250023		1	0.62	-0.253012	0.72	-0.2	4.827	-0.574714	101.46	-0.266165	0.540315	-0.0325604	-0.26529		1
0.005	0.9				0.005	0.766667				1	0.8	-0.0361446	0.82	-0.0888889	6.61	-0.417621	123.35	-0.10784	0.609625	0.0814025	-0.113326		1	0.64	-0.228916	0.72	-0.2	5.174	-0.544141	130.03	-0.0595255	0.484265	-0.132919	-0.2331		1	0.66	-0.204819	0.84	-0.0666667	6.97	-0.385903	122.92	-0.11095	0.515605	-0.0768039	-0.169029		1
0.005	0.866667				0.005	0.8				1	0.72	-0.13253	0.8	-0.111111	6.932	-0.389251	113.16	-0.181542	0.5775	0.030303	-0.156307		1	0.62	-0.253012	0.74	-0.177778	4.181	-0.63163	136.02	-0.0162014	0.499935	-0.104861	-0.236696		1	0.8	-0.0361446	0.86	-0.0444444	6.606	-0.417974	113.31	-0.180457	0.55865	0.000268504	-0.13575		1
0.01	0.933333				0.01	0.8
0.01	0.866667				0.01	0.8
0.01	0.766667				0.01	0.766667
0.01	0.733333				0.01	0.8
0.1	0.8				0.1	0.7
0.1	0.666667				0.1	0.733333
0.1	0.9				0.1	0.766667
0.1	0.666667				0.1	0.8
1	0.533333				1	0.8
1	0.6				1	0.766667
1	0.5				1	0.933333
1	0.733333				1	0.9
[truncated: 11 more columns]

## Sheet: D. sanguinalis
1,4-cyclohexanedicarboxylic acid	germination rate				trehalose	germination rate
CK	0.8				CK	0.8
CK	0.8				CK	0.8
CK	0.8				CK	0.8
CK	0.933333				CK	0.933333
1e-05	0.933333				1e-05	ND
1e-05	0.966667				1e-05	ND
1e-05	1				1e-05	ND
1e-05	0.966667				1e-05	ND
0.0001	0.566667				0.0001	ND
0.0001	0.6				0.0001	ND
0.0001	0.6				0.0001	ND
0.0001	0.633333				0.0001	ND
0.001	0				0.001	0.766667
0.001	0				0.001	0.933333
0.001	0				0.001	0.966667
0.001	0.0333333				0.001	0.966667
0.005	0				0.005	0.9
0.005	0				0.005	0.9
0.005	0				0.005	0.933333
0.005	0				0.005	0.933333
0.01	0				0.01	0.8
0.01	0				0.01	0.866667
0.01	0				0.01	0.8
0.01	0				0.01	0.933333
0.1	0				0.1	0.87
0.1	0				0.1	0.85
0.1	0				0.1	0.83
0.1	0				0.1	0.91
1	0				1	0.8
1	0				1	0.86
1	0				1	0.81
1	0				1	0.83

## Sheet: A. retroflexus
1,4-cyclohexanedicarboxylic acid	germination rate				trehalose	germination rate
CK	0.6				CK	0.6
CK	0.466667				CK	0.466667
CK	0.633333				CK	0.633333
CK	0.6				CK	0.6
1e-05	0.51				1e-05	ND
1e-05	0.566667				1e-05	ND
1e-05	0.566667				1e-05	ND
1e-05	0.5				1e-05	ND
0.0001	0.633333				0.0001	ND
0.0001	0.733333				0.0001	ND
0.0001	0.666667				0.0001	ND
0.0001	0.68				0.0001	ND
0.001	0.833333				0.001	0.766667
0.001	0.833333				0.001	0.566667
0.001	0.8				0.001	0.733333
0.001	0.8				0.001	0.633333
0.005	0.0666667				0.005	0.466667
0.005	0.0333333				0.005	0.366667
0.005	0				0.005	0.533333
0.005	0				0.005	0.666667
0.01	0.133333				0.01	0.7
0.01	0.0333333				0.01	0.4
0.01	0.2				0.01	0.666667
0.01	0.0333333				0.01	0.466667
0.1	0				0.1	0.58
0.1	0				0.1	0.53
0.1	0				0.1	0.56
0.1	0				0.1	0.7
1	0				1	0.57
1	0				1	0.55
1	0				1	0.48
1	0				1	0.46
